# Supplementary material for: Effects of Socioeconomic Status and Social Support on Violence against Pregnant Women: A Structural Equation Modeling Analysis
Source: PLoS One. 2017 Jan 20;12(1):e0170469. doi: 10.1371/journal.pone.0170469 (PMC5249246; doi:10.1371/journal.pone.0170469)
Supplement: S1 File — (XLS) [file pone.0170469.s001.xls]

## Sheet: Sheet1
idadeg	m9tang	m10emo	m11inf	m12tang	m13effe	m14int	m15inf	m16emo	m17effe	m18int	m19tang	m20inf	m21int	m22tang	m23emo	m24inf	m25int	m26emo	m27effe	v1	v2	v3	v4	v5	v6	v7	v8	v9	v10	v11	v12	v13	edu	occu	class	inc
31	1	4	4	2	2	2	3	4	3	3	2	4	4	3	4	4	3	4	4	0	0	0	0	0	0	0	0	0	0	0	0	0	2	1	1	2
40	4	4	4	4	4	4	4	4	4	4	4	4	4	4	4	4	4	4	4	0	0	0	0	0	0	0	0	0	0	0	0	0	3	4	3	4
20	0	2	2	1	3	3	2	2	3	4	2	1	2	2	1	1	4	2	4	0	0	0	0	0	0	0	0	0	0	0	0	0	3	1		2
33	4	2	2	4	3	2	0	3	4	4	3	3	1	4	4	0	4	4	4	2	0	1	0	1	0	0	1	0	1	0	0	0	2	4	2	3
20	4	4	4	4	4	4	4	4	4	4	4	4	4	4	4	4	4	4	4	0	0	0	0	0	0	0	0	0	0	0	0	0	3	1	2	2
29	2	2	2	2	2	2	2	2	2	2	3	2	2	2	2	2	2	2	2	0	0	0	0	0	0	0	0	0	0	0	0	0	3	1	2	3
32	4	4	4	4	4	4	4	4	4	4	4	4	4	4	4	4	4	4	4	0	0	0	0	0	0	0	0	0	0	0	0	0	3	2	2	3
23	1	2	1	1	4	4	3	2	4	1	4	4	4	4	4	1	2	2	4	0	0	0	0	0	0	0	0	0	0	0	0	0	3	2	2	2
20	2	1	4	2	4	2	2	4	4	3	1	4	3	2	4	2	2	4	4	0	0	0	0	0	0	0	0	0	0	0	0	0	3			2
31	4	2	3	1	2	4	4	3	2	1	2	2	2	0	1	3	4	3	4	1	0	0	0	0	1	0	0	0	0	0	0	0	3	2	3	3
27	4	2	3	4	3	2	4	1	2	4	4	3	4	4	3	3	3	2	4	2	1	2	0	0	0	0	0	0	0	0	0	0	3	2	1	2
27	2	1	2	2	4	2	1	3	0	4	2	0	3	2	2	0	4	0	4	1	0	0	0	0	0	0	0	0	0	0	0	0	2	1		1
20	1	1	4	1	4	4	4	2	4	2	4	4	4	4	4	2	2	2	1	3	3	0	0	0	0	0	0	0	0	0	0	0	3		2
23	1	0	0	1	2	2	1	0	3	1	3	0	3	3	0	1	3	0	1	2	0	0	0	0	1	0	0	0	0	0	0	0	3		1	2
34	0	1	1	1	0	0	2	1	0	0	0	2	0	1	1	1	2	1	0	0	1	2	1	0	0	0	0	0	0	0	0	0	3	4	2	2
35	2	4	2	4	3	3	2	3	4	4	2	2	3	2	3	1	4	1	4	0	0	0	0	0	0	0	0	0	0	0	0	0	3	4	2	1
31	2	3	3	1	2	1	2	3	2	2	1	3	2	1	2	2	2	1	2	0	0	0	0	0	0	0	0	0	0	0	0	0	3	2	2	2
39	4	4	4	4	4	4	4	4	4	3	4	4	4	4	4	4	4	4	4	0	0	0	0	0	0	0	0	0	0	0	0	0	2	2	1	2
26	1	3	2	0	2	1	3	3	1	0	1	2	1	1	2	2	1	2	2	0	0	0	0	0	0	0	0	0	0	0	0	0	3	4	2	3
27	3	2	2	4	2	2	1	2	1	1	1	1	2	2	1	2	2	1	1	0	0	0	0	0	0	0	0	0	0	0	0	0	4	4	3	4
30	2	3	4	1	4	4	3	3	4	2	2	4	2	3	2	2	4	3	4	0	0	0	0	0	0	0	0	0	0	0	0	0	3	2	2	3
39	2	4	2	3	0	2	0	0	2	1	0	2	2	0	0	0	2	3	4	0	1	0	0	0	0	0	0	0	0	0	0	0	3	2	1	2
29	4	4	4	2	4	3	4	4	2	4	1	4	2	1	3	4	3	2	4	0	1	1	0	0	0	0	0	0	0	0	0	0	2		1	2
28	4	4	4	3	4	3	3	3	4	4	4	3	3	4	3	4	4	3	4	0	0	2	0	0	0	0	0	0	0	0	0	0	3	2	2	3
26	1	2	3	1	4	2	2	3	4	3	2	3	2	1	3	3	2	2	4	1	0	0	0	0	0	0	0	0	0	0	0	0	3	2	2	2
34	4	4	4	4	4	4	4	4	4	4	4	4	4	4	3	4	4	4	4	0	0	1	0	0	0	0	0	0	0	0	0	0	3	2	2	3
26	1	2	3	1	3	3	3	2	3	1	2	3	2	3	4	4	3	2	4	0	0	0	0	0	0	0	0	0	0	0	0	0	3	2	2	2
30	4	4	4	1	4	1	2	4	4	4	4	1	2	4	4	2	4	2	4	0	0	1	0	0	0	0	0	0	0	0	0	1	3	1	1	1
27	2	1	2	1	1	2	1	1	1	1	1	1	1	2	1	2	2	1	1	1	1	0	0	0	0	0	0	0	0	0	0	0	3	4	2	2
22	4	3	3	4	4	3	3	3	4	3	3	4	3	4	3	4	3	4	4	0	0	0	0	0	0	0	0	0	0	0	0	0	3	2	1	2
41	2	3	2	1	3	2	3	3	2	2	2	2	2	2	1	2	2	2	2	0	0	0	0	0	0	0	0	0	0	0	0	0	4	3	2	4
25	4	3	3	0	3	3	3	2	3	2	2	2	2	3	1	2	2	2	3	2	0	0	0	0	0	0	0	0	0	0	0	0	3	1	2	1
19	1	4	2	4	4	2	1	2	4	1	0	4	4	2	4	3	3	0	3	1	0	0	0	0	0	0	0	0	0	0	0	0	3	1	2	2
31	3	2	3	3	3	2	2	2	3	1	2	1	2	2	1	2	1	1	2	0	0	0	0	0	0	0	0	0	0	0	0	0	3	1	2	2
26	0	3	2	2	3	1	2	2	3	1	2	3	1	2	2	2	1	1	2	0	0	0	0	0	0	0	0	0	0	0	0	0	3	4	2	2
22	4	4	3	4	4	4	4	4	4	4	2	4	4	2	4	4	4	4	4	0	0	0	0	0	0	0	0	0	0	0	0	0	2	2	2	3
32	3	0	0	2	2	0	0	0	0	0	2	0	0	1	0	0	0	0	0	3	2	3	3	0	0	0	0	0	0	0	0	0	2	2	2	2
21	4	4	4	4	4	3	4	4	4	3	3	4	3	4	4	4	4	3	4	0	0	1	0	0	0	0	0	0	0	0	0	0	3	4	2	2
18	4	2	4	4	4	4	4	3	3	2	4	4	2	4	3	4	3	2	4	0	1	0	0	0	0	0	0	0	0	0	0	0	2	1	1	2
28	4	2	2	1	3	3	2	4	4	3	2	3	3	4	3	2	4	3	4	1	1	1	0	0	0	0	0	0	0	0	0	0	4	2	2	2
36	4	4	4	4	4	4	3	4	4	3	4	4	3	4	4	4	4	3	4	0	0	0	0	0	0	0	0	0	0	0	0	0	3	1	2	2
28	3	4	4	2	4	3	3	4	4	4	3	4	4	2	4	4	4	4	4	0	0	0	0	0	0	0	0	0	0	0	0	0	3	2	2	2
21	1	1	0	1	2	1	2	0	1	2	0	2	1	1	0	1	2	2	2	0	0	0	0	0	0	0	0	0	0	0	0	0	3	1	2	2
26	2	1	2	4	4	4	2	4	4	3	4	4	2	4	4	2	4	4	4	0	0	0	0	0	0	0	0	0	0	0	0	0	2	2	2	3
19	4	4	4	4	4	2	4	4	3	3	3	3	3	1	3	3	4	3	4	0	0	0	0	0	0	0	0	0	0	0	0	0	3	2	2	2
22	2	2	3	1	3	3	2	2	4	3	1	3	1	3	0	3	3	2	3	0	0	0	0	0	0	0	0	0	0	0	0	0	3	1	2	2
23	3	3	2	1	2	3	3	3	2	1	1	1	3	2	3	2	1	2	2	0	0	0	0	0	0	0	0	0	0	0	0	0	2		1	2
24	3	3	3	3	3	3	2	2	2	2	3	2	3	2	2	2	3	2	3	0	0	0	0	0	0	0	0	0	0	0	0	0	3	2	2	2
28	4	4	4	4	4	4	4	4	4	4	4	3	4	4	4	4	4	4	4	1	0	0	0	0	0	0	0	0	0	0	0	0	3	2	2	2
24	4	4	4	4	4	2	3	4	4	3	2	3	2	3	2	2	3	3	3	0	0	2	0	0	0	0	0	0	0	0	0	0	3	4	2	2
31	4	4	4	4	4	4	2	2	4	4	4	4	4	2	2	2	2	2	4	2	0	0	0	0	0	0	0	0	0	0	0	0	3	1	2	2
18	0	0	0	0	2	4	2	2	4	4	2	4	2	2	2	2	4	4	4	3	0	0	0	0	0	3	0	0	0	0	0	0	1	1		4
19	4	4	3	4	4	4	3	4	4	4	3	4	3	3	4	4	3	4	4	0	0	0	0	0	0	0	0	0	0	0	0	0	4	5	3	4
27	1	2	2	3	2	3	2	2	2	1	2	2	3	2	1	2	2	2	3	1	0	0	0	1	1	0	0	0	0	0	0	0	3	4	2	3
21	1	0	0	1	1	1	0	0	1	1	1	3	2	0	0	0	1	0	2	1	0	0	0	1	0	0	0	0	0	0	0	0	2			1
28	1	3	2	1	3	4	4	4	4	4	1	3	4	4	4	4	4	4	4	3	2	3	0	0	0	0	0	0	0	0	0	0	3	4	2	3
25	4	4	3	4	4	3	3	4	3	3	4	3	3	4	4	3	4	3	4	0	0	0	0	0	0	0	0	0	0	0	0	0	4	1	2	3
25	3	2	2	3	4	2	2	2	2	2	3	2	2	3	1	2	2	1	2	3	0	3	0	0	0	0	0	0	0	0	0	0	3		1	1
35	4	4	1	4	4	4	3	4	4	4	3	1	4	4	4	4	3	3	4	0	0	0	0	0	0	0	0	0	0	0	0	0	3	3	2	2
35	2	2	1	2	1	1	3	0	2	2	3	3	2	0	1	2	1	2	4	1	0	2	0	0	0	0	0	0	0	0	0	0	3	1	2	2
36	1	2	1	4	4	2	2	2	1	3	3	4	3	2	2	3	1	2	3	0	0	0	0	0	0	0	0	0	0	0	0	0	3		1	3
31	0	0	2	0	0	0	0	0	1	1	0	2	1	1	0	0	1	1	0	2	0	0	0	0	0	0	0	0	0	0	0	0	2	1	1
31	1	3	3	1	3	4	3	3	3	4	4	3	4	3	1	3	4	3	4	1	0	0	1	0	0	0	0	0	0	0	0	0	3	2	2	2
25	3	3	4	3	4	2	3	2	2	3	2	2	2	2	2	2	2	2	2	0	0	0	0	0	0	0	0	0	0	0	0	0	4	4	3	3
24	4	4	4	3	4	4	4	4	4	4	4	4	4	4	3	4	4	4	4	0	0	0	0	0	0	0	0	0	0	0	0	0	4	6	3	3
18	1	2	2	4	2	2	2	2	4	0	0	4	2	4	3	1	2	4	2	2	0	0	0	1	0	0	0	0	0	0	0	0	2	1	2	1
19	4	4	4	4	4	3	2	4	3	3	2	3	3	2	3	3	3	2	3	0	0	0	1	0	0	0	0	0	0	0	0	0	3		2	2
27	4	4	4	4	4	4	4	4	4	4	4	4	3	4	4	4	2	4	4	0	0	0	0	0	0	0	0	0	0	0	0	0	3	4	2	1
16	1	2	1	3	2	1	3	2	1	1	1	2	1	1	1	2	1	2	2	0	0	0	0	0	0	0	0	0	0	0	0	0	3		2	2
28	3	4	4	1	1	2	1	3	4	2	4	3	3	3	2	1	1	2	4	0	0	0	0	0	0	0	0	0	0	0	0	0	3	2	2	1
28	4	4	4	4	4	4	4	4	4	4	4	4	4	4	4	4	4	4	4	0	0	0	0	0	0	0	0	0	0	0	0	0	3	1	2	2
26	4	4	2	4	4	4	4	4	4	4	4	4	4	4	4	4	4	4	4	3	2	0	1	0	0	0	0	0	0	0	0	0	2		2	2
38	4	3	2	4	3	3	3	3	3	3	3	3	3	3	1	3	3	2	4	0	0	0	0	0	0	0	0	0	0	0	0	0	3	1	1	2
20	4	3	2	3	4	4	4	3	4	4	3	4	4	4	3	2	4	2	4	1	1	1	0	0	0	0	0	0	0	0	0	0	4	4	3	2
22	2	3	2	4	3	3	3	2	4	3	1	2	1	2	1	2	3	2	3	0	0	0	0	0	0	0	0	0	0	0	0	0	3	2	3	3
22	4	4	4	3	4	4	4	4	4	4	3	4	4	4	4	4	4	4	4	0	0	0	0	0	0	0	0	0	0	0	0	0	3	2	2	4
34	4	3	4	4	2	2	1	4	1	1	1	1	1	4	2	1	1	1	2	2	1	0	0	0	0	0	0	0	0	0	0	0	3	4	2	2
18	2	4	4	4	2	2	2	4	2	2	4	2	2	4	2	4	2	4	2	1	0	0	0	0	1	0	1	0	0	0	0	0	2		2	2
18	4	4	4	4	4	2	4	4	2	4	4	4	4	4	4	4	4	4	4	0	0	0	0	0	0	0	0	0	0	0	0	0	2		1
29	2	3	4	0	2	3	1	3	1	0	0	4	1	1	4	4	2	3	0	0	1	0	0	0	0	0	0	0	0	0	0	0	3	1	2	2
24	2	3	1	1	1	2	1	1	1	0	0	2	2	3	2	2	2	2	4	1	0	0	0	0	0	0	0	0	0	0	0	0	3	4	2	3
30	2	2	2	2	2	2	2	2	2	2	2	2	2	2	2	2	2	2	2	1	1	1	1	1	1	0	1	0	0	0	0	0	3	2	1	1
29	4	3	3	3	4	2	2	3	4	3	4	4	4	3	4	3	4	3	4	0	0	0	0	0	0	0	0	0	0	0	0	0	3	1	2	2
17	4	3	4	4	4	3	3	3	4	4	3	3	3	4	4	3	4	3	4	2	2	0	0	1	0	0	0	0	0	0	0	0	3	4	2	2
25	4	4	4	3	4	4	4	4	4	4	4	4	4	3	4	4	4	4	4	3	0	0	0	0	0	0	0	0	0	0	0	0	3	2	2	2
37	1	2	2	2	3	3	2	2	3	3	3	2	3	3	2	1	2	2	3	0	0	0	0	0	0	0	0	0	0	0	0	0	3	2	2	2
22	1	2	4	2	2	1	1	4	1	1	2	2	1	1	1	1	1	1	1	0	0	0	0	0	0	0	0	0	0	0	0	0	3	1	1	1
29	0	2	4	2	4	4	3	4	3	3	1	3	4	3	3	4	4	3	4	0	0	0	0	0	0	0	0	0	0	0	0	0	3	4	2
25	2	3	4	2	1	3	3	2	1	1	1	1	1	2	1	1	1	1	1	0	0	0	0	0	0	0	0	0	0	0	0	0	3	1	2	2
22	0	2	3	2	2	1	2	1	2	1	2	1	2	1	2	1	1	2	2	0	0	0	0	0	0	0	0	0	0	0	0	0	3	4	2	2
16	1	2	2	3	4	4	3	3	4	4	1	2	3	3	4	3	4	4	4	0	0	0	0	0	0	0	0	0	0	0	0	0	3	3	2
42	4	4	4	4	4	4	4	4	4	4	4	4	4	3	3	3	4	4	4	2	0	0	0	0	0	0	0	0	0	0	0	0	3	2	2	2
34	4	3	2	4	3	3	3	3	4	3	4	3	2	4	2	3	2	2	4	0	0	0	0	0	0	0	0	0	0	0	0	0	3	1	2	2
31	4	4	4	2	4	4	4	4	4	4	4	4	4	4	4	4	4	4	4	0	0	0	0	0	0	0	0	0	0	0	0	0	3	1	2	1
36	0	4	4	4	4	4	4	4	4	4	3	4	4	4	4	4	4	4	4	0	0	0	1	0	0	0	0	0	0	0	0	0	4	2	2	4
20	3	3	2	3	3	3	3	4	4	4	4	3	3	4	3	3	3	3	4	2	0	0	0	0	0	0	0	0	0	0	0	0	3	2	2	3
33	4	4	3	4	4	4	4	4	4	4	3	4	4	3	4	4	4	4	4	0	0	1	0	0	0	0	0	0	0	0	0	0	3	4	2	2
20	4	4	3	3	4	4	3	3	4	3	2	4	3	3	3	4	3	4	4	2	1	1	0	0	0	0	0	0	0	0	0	0	2	4	2	2
35	4	4	4	4	4	2	2	4	4	4	4	4	4	4	4	2	4	2	4	0	0	0	0	0	0	0	0	0	0	0	0	0	3	2	2	4
22	3	1	1	2	2	2	2	1	3	2	2	2	2	2	1	1	2	2	2	0	0	0	0	0	0	0	0	0	0	0	0	0	3	2	2	2
18	3	2	3	2	4	4	3	4	4	3	4	3	3	4	3	4	4	3	4	0	0	0	0	0	0	0	0	0	0	0	0	0	3	2	3	4
22	3	3	3	2	3	3	3	3	3	3	2	3	3	3	3	3	3	3	3	2	0	0	0	0	0	0	0	0	0	0	0	0	3	2	2	4
14	4	4	4	4	4	4	4	3	4	4	4	4	3	4	2	4	4	4	4	2	0	2	0	0	0	0	0	0	0	0	0	0	2		2	2
29	1	2	2	0	2	2	1	1	2	2	2	2	1	2	2	0	2	1	1	0	0	0	0	0	0	0	0	0	0	0	0	0	3	1	2	3
19	3	2	3	3	3	4	3	2	2	1	2	2	2	1	1	2	3	1	4	0	0	0	0	0	0	0	0	0	0	0	0	0	3	1	2
26	1	2	2	1	3	3	3	3	4	3	2	3	3	3	3	3	3	3	4	0	0	0	0	0	0	0	0	0	0	0	0	0	3	1	2	2
19	4	3	4	3	4	3	3	4	4	3	4	4	4	4	4	4	2	4	4	1	0	0	0	0	1	0	0	0	0	0	0	0	3	4	2
15	0	0	2	4	1	2	2	0	2	0	0	0	2	2	2	2	1	0	2	0	0	0	1	0	0	2	2	0	1	0	0	0	2	2	1	2
29	1	3	3	2	2	3	3	3	3	3	1	3	2	3	3	4	3	3	4	2	2	3	0	0	0	0	0	0	0	0	0	0	3	4	3	4
20	2	3	3	4	4	4	3	3	4	2	2	3	3	2	3	3	3	3	4	2	0	0	0	0	0	0	0	0	0	0	0	0	3	2	2	3
20	4	4	4	4	4	4	4	4	2	4	4	4	2	3	2	2	4	4	4	0	0	0	0	0	0	0	0	0	0	0	0	0	2	2	2	3
27	1	2	3	4	3	4	4	4	4	4	2	4	3	2	2	2	4	4	4	0	0	0	0	0	0	0	0	0	0	0	0	0	3	2	2	2
23	4	3	4	4	4	4	4	4	4	3	4	4	4	4	3	4	4	4	4	0	0	0	0	0	0	0	0	0	0	0	0	0	3	1	1
27	4	4	2	4	2	3	3	4	2	2	4	2	2	4	4	3	2	2	4	2	0	0	0	0	0	0	0	0	0	0	0	0	3	2	2	2
25	2	1	1	0	1	2	1	0	2	1	1	2	1	2	0	0	2	1	4	2	1	0	0	0	0	0	0	0	0	0	0	0	3	2	2	1
33	4	4	4	4	4	4	4	4	4	4	2	4	4	4	4	4	4	4	4	2	0	0	0	1	0	0	0	0	0	0	0	0	2	4	2	3
23	2	0	2	2	3	1	2	0	3	1	2	1	1	2	1	1	2	1	0	2	1	1	1	1	1	1	0	0	1	0	0	0	2	1	2	2
31	2	3	1	1	2	3	2	1	3	2	2	4	3	1	2	3	2	4	3	1	0	0	1	0	0	0	0	0	0	0	0	0	3	4	2	2
27	4	4	4	3	4	4	4	4	4	4	4	4	4	4	4	4	4	4	4	0	1	1	0	0	0	0	0	0	0	0	0	0	4	4	2	3
30	4	4	3	3	4	3	4	3	3	4	3	3	3	4	3	3	3	3	3	0	0	0	0	0	0	0	0	0	0	0	0	0	3	6	2	3
19	3	1	3	4	4	3	3	3	4	3	4	3	3	4	3	3	3	3	4	0	0	0	0	0	0	0	0	0	0	0	0	0	3	1	2	2
24	4	3	3	2	4	2	4	4	4	2	2	2	2	3	2	2	2	3	4	1	1	0	0	0	0	0	0	0	0	0	0	0	4	5	2	3
27	4	3	3	4	4	3	3	2	3	3	4	3	3	4	2	2	3	2	4	1	1	0	0	0	0	0	0	0	0	0	0	0	3	2	2	3
23	4	4	4	4	4	4	4	4	4	4	4	4	4	4	4	4	4	4	4	3	3	0	3	3	3	0	1	0	0	0	0	0	3	2	2
17	4	4	4	4	4	4	3	4	4	4	3	4	4	3	4	4	3	4	4	2	0	1	0	0	0	0	0	0	0	0	0	0	3	1		3
31	3	3	3	2	3	2	2	2	2	1	1	1	3	1	2	2	1	2	1	1	0	0	0	0	0	0	0	0	0	0	0	0	3	1	1	2
27	0	4	4	0	4	4	3	4	4	3	4	4	4	4	4	4	4	4	4	0	0	0	0	0	0	0	0	0	0	2	2	0	4	1	2	2
31	2	2	3	2	4	2	3	4	4	2	2	3	3	2	4	3	2	3	4	0	0	0	0	0	0	0	0	0	0	0	0	0	3	2	2	2
34	4	2	4	4	4	4	4	4	4	4	4	4	4	4	4	4	4	4	4	0	0	0	0	0	0	0	0	0	0	0	0	0	3	4	2	3
24	2	2	4	4	4	3	4	3	4	2	4	2	2	4	2	2	3	2	2	2	1	1	2	1	1	1	1	0	0	0	0	0	3	5	2	2
26	1	2	1	2	4	1	2	1	0	1	1	2	2	3	1	2	1	2	2	2	0	0	0	0	0	0	0	0	0	0	0	0	3	2	2	2
24	4	4	4	4	4	4	4	4	4	4	4	4	4	4	4	4	4	4	4	0	0	0	0	0	0	0	0	0	0	0	0	0	3	2	2	2
32	2	2	3	1	3	2	2	2	2	3	2	2	3	2	2	2	3	2	3	2	0	2	0	0	0	0	0	0	0	0	0	0	3	1	2	2
44	3	3	3	1	4	3	2	3	4	4	1	3	4	2	3	2	4	3	4	3	2	1	2	1	1	0	0	0	0	0	0	0	4	2	2	2
18	1	2	4	4	4	4	4	4	4	4	4	4	3	4	4	3	4	4	4	1	0	0	0	0	0	0	0	0	0	0	0	0	3	2	1	2
30	3	3	3	2	3	2	4	4	3	3	4	4	3	4	4	4	3	2	4	1	0	0	0	0	0	0	0	0	0	0	0	0	2	1	2	3
30	0	0	0	0	4	1	0	1	4	4	0	1	2	4	2	1	2	2	4	0	0	0	0	0	0	0	0	0	0	0	0	0	3	2	2	2
39	1	3	3	1	1	1	1	2	1	1	2	1	2	1	1	1	2	1	2	2	0	0	0	0	0	0	0	0	0	0	0	0		1	1	1
24	4	4	4	4	4	4	4	4	4	2	4	4	4	4	4	4	4	4	4	0	0	0	0	0	0	0	0	0	0	0	0	0	3	1	2	2
32	2	2	2	1	1	1	1	2	1	0	2	1	1	2	2	1	2	2	2	0	1	0	0	0	0	0	0	0	0	0	0	0	2	1	2	2
17	2	4	4	4	4	4	3	3	4	2	4	4	4	4	4	4	3	4	4	0	1	1	0	0	0	0	1	1	1	0	0	0	3			3
32	4	4	4	4	4	4	4	4	4	4	4	4	4	4	4	4	4	4	4	0	0	0	0	0	0	0	0	0	0	0	0	0	3	5	3	2
24	1	1	1	1	2	1	2	1	2	0	0	3	1	0	0	1	2	1	2	1	0	1	0	0	0	0	0	0	0	0	0	0	3	1	2	2
31	2	2	3	1	2	2	2	2	2	2	3	2	2	3	2	2	2	2	2	0	0	0	0	0	0	0	0	0	0	0	0	0	3	4	1	3
24	3	3	0	0	4	4	3	0	4	4	2	2	4	2	0	4	4	2	4	0	0	0	0	0	0	0	0	0	0	0	0	0	1	3	2	2
15	4	4	4	4	4	2	4	4	4	4	2	4	4	4	2	4	3	4	4	0	0	3	2	0	0	0	0	0	0	0	0	0	2	2	2
22	4	4	4	4	4	4	3	4	4	3	3	4	3	4	3	4	3	3	3	3	0	0	0	0	0		0	0	0	0	0	0	3	5	3	1
22	2	3	2	2	2	2	1	2	4	2	1	2	0	4	0	1	2	1	4	0	0	0	0	0	0	0	0	0	0	0	0	0	3	1	1	2
32	2	1	2	0	2	2	2	2	2	1	2	2	2	2	2	2	2	2	2	0	0	0	0	0	0	0	0	0	0	0	0	0	3	2	1	2
25	4	3	3	4	4	4	3	4	3	4	4	3	3	4	3	3	4	3	4	0	0	0	0	0	0	0	0	0	0	0	0	0	3		3	3
33	4	4	2	4	4	1	2	0	0	2	4	4	2	1	2	0	2	0	2	0	0	0	0	0	0	0	0	0	0	0	0	0	2	2	1	2
16	0	4	4	4	4	4	4	4	4	4	2	4	4	2	4	4	4	4	4	0	0	0	0	0	0	0	0	0	0	0	0	0	2	1	2	2
19	2	1	2	3	2	2	0	1	2	3	2	3	2	1	3	0	0	2	4	0	0	1	0	0	0	0	0	0	0	0	0	0	2			2
25	1	2	4	1	3	3	3	2	2	2	3	4	1	2	1	3	2	2	1	0	0	0	0	0	0	0	0	0	0	0	0	0	3	1	1	2
32	2	1	3	0	0	0	2	1	1	4	0	4	1	4	1	2	0	4	3	3	0	0	1	1	0	0	0	0	0	0	0	0	3		2	1
23	4	4	4	3	4	4	3	4	4	4	3	3	4	3	3	3	4	4	4	1	0	0	0	0	0	0	0	0	0	0	0	0	3	2	2	2
26	4	3	2	3	4	4	4	3	4	2	3	1	3	3	4	3	4	3	3	1	0	0	0	0	0	0	0	0	0	0	0	0	3	2	2
23	4	3	4	4	4	4	3	3	4	4	4	4	3	4	3	3	4	3	4	1	1	1	1	0	1	0	0	0	0	0	0	0	3	2	3	2
36	2	2	1	1	2	2	2	2	2	1	2	2	2	2	2	2	2	1	2	2	0	0	0	0	0	0	0	0	0	0	0	0	3	6	2	3
28	1	2	2	3	3	1	1	2	3	2	3	2	1	3	1	2	2	1	3	0	0	0	0	0	0	0	0	0	0	0	0	0	3		2
25	1	4	4	4	3	2	4	2	1	1	0	3	1	3	3	3	2	3	3	0	0	0	0	0	0	0	0	0	0	0	0	0	3	2	2	3
31	4	3	4	3	4	3	4	4	4	3	4	4	3	4	4	4	4	4	4	0	0	0	0	0	0	0	0	0	0	0	0	0	1	1	2	2
33	4	4	4	1	4	4	4	4	4	4	3	4	4	3	4	4	4	3	3	0	0	0	0	0	0	0	0	0	0	0	0	0	3	4	1	2
25	1	3	2	1	2	2	1	2	3	2	1	2	2	1	2	2	3	2	4	0	0	0	0	0	0	0	0	0	0	0	0	0	3	4	2	2
20	4	1	2	4	1	2	1	2	1	0	4	2	1	4	3	1	2	3	2	0	0	0	0	0	0	0	0	0	0	0	0	0	3	2	2	2
26	1	1	2	1	4	4	3	2	3	3	1	2	2	0	1	1	3	2	4	0	1	1	0	0	0	0	0	0	0	0	0	0	3	4	1	2
21	2	2	4	0	4	4	3	4	4	4	3	4	3	3	2	4	4	4	4	0	0	0	0	0	0	0	0	0	0	0	0	0	3	2	2	3
25	4	4	4	4	4	4	4	4	4	4	4	4	4	4	4	4	4	4	4	0	0	0	0	0	0	0	0	0	0	0	0	0	4	4	3	4
22	2	4	4	4	4	4	4	4	4	4	4	4	4	1	2	4	4	4	4	0	0	0	0	0	0	0	0	0	0	0	0	0	3	1	2	2
22	0	0	1	3	1	2	1	1	1	1	2	2	2	1	1	0	2	1	3	0	0	0	0	0	0	0	0	0	0	0	0	0	3	2	1	2
22	4	4	4	3	4	4	4	4	4	3	4	3	3	4	3	4	4	3	4	0	0	0	0	0	0	0	0	0	0	0	0	0	3	1	2	2
26	3	2	1	2	1	1	1	2	1	1	2	1	1	1	0	1	1	0	1	2	0	0	0	0	0	0	0	0	0	0	0	0	3	1	2	2
32	1	0	2	2	3	4	2	4	4	4	4	2	4	4	4	4	4	4	4	0	0	0	0	0		0	0	0	0	0	0	0	3	2	2	3
23	4	4	4	4	4	2	3	2	4	3	3	3	2	3	3	3	3	2	2	2	2	0	0	1	0	0	0	0	0	2	0	1	4	2	1	2
30	0	1	1	0	1	1	1	1	1	2	2	2	2	2	2	2	2	2	1	1	1	1	0	0	0	0	0	0	0	0	0	0	3	1	2	1
40	4	3	3	3	4	3	3	3	3	3	3	3	3	4	2	2	3	3	3	0	0	0	0	0	0	0	0	0	0	0	0	0	3	1	3	3
34	3	4	4	2	4	4	4	4	4	4	3	3	3	3	3	4	4	4	4	0	0	2	0	0	0	0	0	0	0	0	0	0	3	3	2	3
22	4	4	4	4	4	4	2	4	3	2	4	4	4	4	2	4	2	2	4	0	1	0	0	0	0	0	0	0	0	0	0	0	3	1	2	2
21	2	2	2	2	2	1	2	2	2	2	3	4	2	2	1	2	2	2	2	0	0	0	0	0	0	0	0	0	0	0	0	0	4	2	1	2
22	4	3	4	4	4	4	4	4	4	4	2	3	3	4	4	3	4	4	4	0	0	0	0	0	0	0	0	0	0	0	0	0	3	2	2	2
19	2	3	3	4	4	2	2	3	4	2	1	3	3	1	2	2	2	2	4	2	1	2	0	0	2	0	0	0	0	0	0	0	3	3	2	3
25	3	4	2	0	4	2	3	2	1	1	3	4	4	2	2	2	2	3	4	1	0	0	0	0	0	0	0	0	0	0	0	0	3	1	2	2
18	0	3	3	3	3	3	3	3	3	3	4	3	3	4	4	4	4	4	4	0	0	0	0	0	0	0	0	0	0	0	0	0	2	2	2	2
27	2	3	4	2	2	2	2	2	2	2	2	2	2	2	2	2	2	2	2	0	0	0	0	0	0	0	0	0	0	0	0	0	3	2	2	2
28	3	4	4	2	4	4	3	4	4	4	3	4	3	3	1	1	4	4	4	0	0	0	0	0	0	0	0	0	0	0	0	0	3	2		3
20	2	3	4	3	4	4	2	3	4	2	1	4	3	3	3	2	4	4	4	0	0	0	0	0	0	0	0	0	0	0	0	0	3	1	2	2
18	0	1	0	0	1	1	1	1	1	2	1	2	1	1	0	1	1	1	1	0	0	1	0	0	0	0	0	0	0	0	0	0	3	4	3	4
14	0	2	2	3	2	1	0	1	4	4	2	2	1	1	1	1	3	2	2	1	0	1	0	0	0	0	0	0	0	0	0	0	2	2	1	2
23	4	4	4	4	4	3	3	4	4	3	4	4	3	4	4	4	3	3	3	2	1	0	0	0	1	0	0	0	0	0	0	0	3	1	2	4
27	3	4	3	1	4	3	3	3	3	3	3	2	3	1	4	3	2	2	4	0	0	0	0	0	0	0	0	0	0	0	0	0	3	5	3	4
21	2	2	4	0	3	3	4	4	4	3	1	3	3	2	3	3	2	3	1	0	1	3	1	0	1	1	0	0	0	0	0	0	3	1	2	1
23	4	4	4	4	4	4	3	4	4	4	4	4	4	4	3	3	3	2	4	0	2	0	0	0	0	0	0	0	0	0	0	0	3	6	2	4
27	4	3	4	4	4	4	4	4	4	4	4	3	4	4	3	4	4	3	4	1	0	0	0	0	0	0	0	0	0	0	0	0	3	4	2	3
34	4	2	2	4	3	3	3	2	2	2	2	2	2	2	3	2	3	2	3	0	0	0	0	0	0	0	0	0	0	0	0	0	4	5	3	4
26	1	3	3	1	3	3	2	2	3	2	2	2	1	1	2	2	3	2	3	3	2	0	0	0	0	0	0	0	0	0	0	0	4	4	2	2
28	4	4	4	3	4	4	4	4	4	4	4	4	4	4	4	4	4	4	4	0	0	0	0	0	0	0	0	0	0	0	0	0	3	1	1	1
22	3	1	1	2	3	4	3	1	4	2	3	4	3	3	1	3	3	1	4	0	0	1	0	0	0	0	0	0	0	2	0	0	3	2	1	1
27	2	3	3	1	2	2	2	1	2	1	2	4	2	2	2	2	2	3	3	0	0	0	0	0	0	0	0	0	0	0	0	0	3	2	2	3
24	1	4	4	4	4	4	3	4	4	3	1	4	3	1	1	3	4	4	4	0	0	0	0	0	0	0	0	0	0	0	0	0	2	1	2	2
36	1	2	2	1	4	3	3	3	4	4	1	2	2	2	3	2	4	3	4	0	0	1	0	0	0	0	0	0	0	0	0	0	4	5	2	4
27	3	3	4	3	4	3	3	4	4	4	4	4	4	4	4	3	0	2	4	2	0	0	0	0	0	0	0	0	0	0	0	0	3	1	1	2
38	4	2	2	0	2	2	2	4	2	0	2	2	4	2	4	2	2	0	2	2	2	1	2	0	0	0	0	0	0	0	0	0	3	1	2	2
20	4	4	4	4	4	4	4	4	4	4	4	4	4	4	4	4	4	4	4	0	0	0	0	0	0	0	0	0	0	0	0	0	3	4	3	4
22	4	4	4	3	4	4	4	2	4	3	4	3	4	4	4	3	4	3	4	0	0	0	0	0	0	0	0	0	0	0	0	0	3	2	2	3
29	4	4	4	4	4	4	4	4	4	4	4	4	4	4	4	4	4	4	4	1	0	0	0	0	0	0	0	0	0	0	0	0	4	2	2	4
28	4	4	4	4	4	4	4	4	4	4	4	4	4	4	4	4	4	4	4	0	0	0	0	0	0	0	0	0	0	0	0	0	4	4	3	4
25	4	2	4	4	4	3	3	4	2	2	3	1	3	3	3	2	4	2	4	0	0	1	1	0	0	0	0	0	0	0	0	0	3	2	2	2
27	3	3	2	4	3	3	3	2	3	2	1	2	2	2	2	3	2	2	2	2	2	1	0	0	0	0	0	0	0	0	0	0	4	2	2	3
22	1	1	1	1	1	2	1	1	1	1	1	1	1	1	1	1	2	1	1	0	0	0	0	0	0	0	0	0	0	0	0	0	2	2	2	2
24	4	3	4	3	4	3	4	4	4	3	4	4	3	4	3	4	4	4	4	0	0	0	0	0	0	0	0	0	0	0	0	0	3	4	3	4
23	4	4	4	4	4	2	3	4	4	4	4	4	3	4	4	4	4	4	4	0	1	0	0	0	0	0	0	0	0	0	0	0	3	5	3	4
24	4	4	4	4	4	4	4	4	4	4	4	4	4	4	4	4	4	4	4	0	0	0	0	0	0	0	0	0	0	0	0	0	3	2	3	2
26	3	3	3	2	4	4	3	3	4	3	3	3	3	3	2	3	3	3	4	0	0	0	0	0	0	0	0	0	0	0	0	0	3	1	2	2
22	4	2	4	2	4	2	2	2	2	1	1	4	2	1	2	2	1	2	2	3	2	3	3	2	1	0	0	0	0	0	0	0	4	1	2	1
19	3	4	3	3	4	3	4	3	4	3	2	3	2	2	2	2	3	3	4	0	0	0	0	0	0	0	0	0	0	0	0	0	3	4	2	2
33	4	4	4	4	4	4	4	4	4	4	4	4	4	4	4	4	4	4	4	1	1	0	0	0	0	0	0	0	0	0	0	0	3	2	2	2
28	4	4	4	4	4	4	4	4	4	4	4	4	4	4	4	4	4	4	4	0	0	0	0	0	0	0	0	0	0	0	0	0	3	2	2	4
23	4	4	4	4	4	4	4	4	4	4	4	4	4	4	4	4	4	4	4	0	0	0	0	0	0	0	0	0	0	0	0	0	1	4		2
23	1	4	1	3	4	4	1	4	4	4	4	4	4	4	4	4	4	4	4	0	0	0	0	0	0	0	0	0	0	0	0	0	3	3	2	3
29	4	4	4	1	4	3	4	4	3	4	4	3	4	4	4	3	4	4	4	3	3	2	0	0	0	0	0	0	0	0	0	0	2			3
21	0	1	0	4	4	2	2	1	2	3	4	4	4	4	3	2	2	4	3	0	0	0	0	0	0	0	0	0	0	0	0	0	3	1
35	4	3	2	4	4	3	2	2	4	3	2	2	2	3	1	2	4	2	3	0	0	0	0	0	0	0	0	0	0	0	0	0	3	2	2	1
21	4	4	4	4	4	4	4	4	4	4	4	4	4	4	4	4	4	4	4	0	0	0	0	0	0	0	0	0	0	0	0	0	3	2	3	2
27	2	1	3	1	2	1	1	2	1	1	2	1	2	1	1	1	1	1	2	1	0	0	0	0	0	0	0	0	0	0	0	0	3	2	2	1
22	4	4	3	2	4	4	4	3	4	4	1	0	3	1	3	2	3	3	4	0	0	0	0	0	1	0	0	0	0	0	0	0	4	6	2	4
35	4	3	4	4	4	4	3	2	4	4	4	3	2	4	4	4	3	3	4	0	0	0	0	0	0	0	0	0	0	0	0	0	4	4	2	2
24	4	3	3	4	4	2	3	3	4	2	4	2	3	4	4	3	4	3	4	2	1	2	0	0	0	0	0	0	0	0	0	0	4	4	2	2
26	4	4	3	4	4	2	2	3	3	2	4	2	2	4	3	3	3	3	3	0	0	0	0	0	0	0	0	0	0	0	0	0	3	2	2	2
43	0	2	2	0	0	2	2	1	1	1	0	1	2	1	1	2	3	2	0	0	0	0	0	0	0	0	0	0	0	0	0	0	3	3	2	4
27	2	1	3	1	3	3	2	3	4	4	1	2	1	1	3	3	2	4	4	0	0	0	0	0	0	0	0	0	0	0	0	0	4	4	2	2
33	2	2	3	2	4	4	3	3	4	4	4	4	4	3	3	3	2	4	3	1	1	0	0	0	0	0	0	0	0	0	0	0	1	2	1	2
30	1	2	1	0	3	3	2	3	4	3	0	2	2	1	1	2	2	2	2	0	0	0	0	0	0	0	0	0	0	0	0	0	3	1	2	2
22	3	2	3	4	4	4	2	1	3	3	4	3	3	4	3	3	3	2	4	3	0	1	1	1	1	0	0	1	0	0	0	0	3		2	2
32	1	2	2	2	2	0	1	0	1	1	2	2	1	2	2	2	1	1	2	0	0	0	0	0	0	0	0	0	0	0	0	0	3	1	1	1
20	4	4	3	3	3	4	3	3	4	3	4	3	4	4	4	4	4	3	4	2	2	3	2	3	3	2	2	0	1	0	0	0	3	4	2	3
36	2	2	2	0	2	2	2	2	2	0	0	0	2	2	2	2	2	0	0	1	3	0	1	0	0	0	0	0	0	2	0	1	1	1	1	2
17	4	3	2	4	4	4	3	3	4	4	4	4	4	4	3	3	3	2	4	0	0	0	0	0	0	0	0	0	0	0	0	0	3	4	2	2
31	2	3	4	1	4	4	3	3	4	4	4	4	4	4	4	4	4	4	4	0	0	0	0	0	0	0	0	0	0	0	0	0	2	2	1	2
15	2	4	3	4	4	4	4	4	4	4	4	4	4	4	4	2	2	4	4	2	0	0	0	0	0	0	0	0	0	0	0	0	2	1		3
24	4	2	3	2	3	4	4	3	4	3	4	3	3	4	3	3	4	3	4	0	0	0	0	0	0	0	0	0	0	0	0	0	3	1	2	2
19	4	3	4	4	4	3	3	4	4	3	3	4	3	4	4	4	3	3	4	0	0	0	0	0	0	0	0	0	1	0	0	0	3	2	2	2
26	4	1	4	1	4	3	4	4	3	2	2	3	2	3	3	4	2	2	2	0	0	0	0	0	0	0	0	0	0	0	0	0	3	1	3	3
30	4	4	3	4	4	4	3	3	4	3	4	3	3	4	3	3	2	2	4	0	0	0	0	0	0	0	0	0	0	0	0	0	3	2	1	2
21	3	2	4	3	4	3	4	3	4	2	4	4	3	4	3	2	2	2	4	0	0	0	0	0	0	0	0	0	0	0	0	0	3	1	1	2
29	4	2	0	2	0	2	2	2	2	2	2	2	2	2	2	2	2	2	2	0	0	0	0	0	0	0	0	0	0	0	0	0	3	3	2	3
24	3	4	4	2	4	4	4	4	3	1	2	4	4	2	2	2	2	2	2	2	1	1	1	0	0	1	0	0	0	0	0	0	3	1	2	2
26	2	0	0	2	3	1	1	1	1	1	2	2	1	2	1	1	2	1	2	0	0	0	1	0	0	0	0	0	0	0	0	0	3	2	2	2
29	2	3	3	2	3	3	3	3	3	1	4	2	3	3	3	2	3	3	3	0	0	0	0	0	0	0	0	0	0	0	0	0	3	2	2	2
16	2	3	0	4	3	2	2	2	4	2	2	2	2	4	2	2	3	2	3	0	0	0	0	0	0	0	0	0	0	0	0	0	3	2	2
31	2	3	4	3	4	4	3	2	2	2	3	2	2	4	2	3	4	4	4	0	0	0	0	0	0	0	0	0	0	0	0	0	2	1	2	2
23	2	2	4	4	4	4	4	2	4	4	2	3	4	3	1	2	3	3	4	2	0	0	0	0	0	0	0	0	0	0	0	0	3			2
27	3	2	2	1	2	3	2	1	4	2	0	2	3	1	1	1	3	2	2	0	0	0	0	0	0	0	0	0	0	0	0	0	3	6	2	3
33	4	4	4	3	4	3	4	4	4	3	4	4	3	4	4	3	4	2	4	0	0	0	0	0	0	0	0	0	0	0	0	0	3	2	2
30	4	4	4	4	4	3	3	4	4	3	4	4	2	4	4	4	3	3	4	0	0	0	0	0	0	0	0	0	0	0	0	0	3	4	2	2
23	4	3	3	4	3	3	4	3	3	3	3	3	3	3	3	3	3	3	3	0	1	1	0	0	0	1	0	0	0	0	0	0	3	1	1	1
21	4	3	4	3	4	3	3	4	4	3	4	4	3	4	4	3	3	3	4	0	0	0	0	0	0	0	0	0	0	0	0	0	3		2
19	4	3	4	2	4	4	3	4	4	4	3	3	3	4	1	2	4	4	4	0	0	0	0	0	0	0	0	0	0	0	0	0	3	2	1	3
29	2	3	4	4	4	2	4	4	4	4	2	4	2	2	4	4	4	2	2	2	1	2	0	0	0	0	0	0	0	0	0	0	3	2	2	2
25	4	4	4	4	4	4	4	4	4	4	4	4	4	4	4	4	4	4	4	0	0	0	0	0	0	0	0	0	0	0	0	0	3	1	2	2
18	4	4	4	4	4	4	4	4	4	4	4	4	3	3	2	4	3	4	4	0	0	0	0	0	0	0	0	0	0	0	0	0	3	2	2	2
25	4	2	2	1	2	4	2	2	2	1	4	1	2	2	1	2	2	2	2	3	2	2	1	0	0	0	0	0	0	0	0	0	4	2	3	3
18	4	1	2	2	2	3	2	0	4	1	4	1	1	4	1	1	2	2	2	1	0	1	0	0	0	0	0	0	0	0	0	0	3	1	2	2
17	3	1	1	3	2	1	1	1	2	2	2	2	3	2	1	1	1	1	2	3	3	2	0	0	0	0	0	0	0	0	0	0	3	2	2	3
22	4	4	4	3	4	3	4	4	4	3	4	4	4	4	4	4	4	4	4	2	1	2	2	2	2	0	0	0	0	0	0	0	3	2	2	2
33	4	4	4	2	4	4	4	4	3	4	0	2	4	0	4	4	4	4	4	2	0	0	1	1	0	0	0	0	0	0	0	0	3	2	2
19	1	1	1	1	1	1	1	1	2	1	1	1	1	1	1	1	1	1	1	0	0	0	0	0	0	0	0	0	0	0	0	0	3	1		3
20	4	4	4	4	4	4	4	4	4	4	4	4	4	4	4	4	4	4	4	0	0	0	0	0	0	0	0	0	0	0	0	0	3	2	2	2
27	1	4	3	3	4	2	3	2	4	3	1	4	3	2	4	4	3	2	4	1	0	0	0	0	0	0	0	0	0	0	0	0	3	2	2	2
24	2	4	4	3	4	3	4	3	3	3	4	4	3	3	3	4	4	4	4	0	0	2	0	0	0	0	0	0	0	0	0	0	3	2	2	2
30	0	2	2	0	3	1	2	2	3	1	0	0	2	0	1	1	2	3	2	2	0	3	2	0	0	0	0	0	0	0	1	0	3	1	2	2
27	4	3	2	4	4	3	4	3	3	4	4	4	4	1	3	3	4	2	4	0	0	0	0	0	0	0	0	0	0	0	0	0	3	2	2	3
29	2	3	4	1	2	3	3	3	1	1	4	3	2	0	0	2	2	3	4	3	3	3	1	0	0	0	0	0	0	0	0	0	4	5	3	3
29	1	2	2	2	2	2	2	2	2	4	4	0	2	4	2	2	2	2	4	3	3	3	1	0	0	0	0	0	0	0	0	0	4	5	3
29	0	2	2	1	1	4	2	4	4	2	1	2	2	4	3	2	3	3	3	0	0	0	0	0	0	0	0	0	0	0	0	0	3	4	2	3
24	4	4	4	4	4	4	4	4	4	4	4	3	4	4	4	4	4	3	4	0	0	0	0	0	0	0	0	0	0	0	0	0	3	4	2	2
24	4	2	4	2	2	1	3	2	3	2	1	2	2	4	2	2	1	2	2	1	0	0	0	0	0	0	0	0	0	0	0	0	3	4	2	4
24	0	3	3	2	3	3	2	1	2	1	0	0	1	1	2	1	0	2	2	1	0	0	0	0	0	0	0	0	0	0	0	0	3	1	2	2
24	4	4	4	2	4	3	2	4	4	3	4	3	2	4	2	3	4	2	4	1	1	2	2	0	0	0	0	0	0	0	0	0	3	2	1	1
16	4	4	2	1	2	1	2	1	1	2	3	1	2	4	1	3	2	1	1	2	1	3	0	0	0	0	0	0	0	0	0	0	3	6	1	2
23	1	3	4	4	4	4	3	4	0	2	2	2	0	4	4	4	3	3	3	0	2	2	2	0	0	0	0	0	0	0	0	0	3	2	2	2
30	1	3	4	1	4	4	3	3	2	2	2	3	2	1	2	2	2	3	4	0	0	0	1	1	1	0	0	0	0	0	0	0	3	2	2	2
28	3	4	4	3	4	4	4	4	4	4	3	4	4	3	4	4	4	4	4	0	0	0	0	0	0	0	0	0	0	0	0	0	3	4	2	4
37	0	2	2	0	0	2	2	2	2	0	2	2	2	2	0	0	2	2	0	0	0	0	0	0	0	0	0	0	0	0	0	0	2	1	1	2
28	2	4	1	0	4	3	2	1	4	1	0	1	0	2	4	1	4	2	4	1	1	0	0	0	0	0	0	0	0	0	0	0	2	2		2
33	4	4	4	2	4	4	4	4	4	4	4	4	3	3	4	3	4	4	4	1	1	3	1	1	1	1	0	0	1	0	0	0	3	4	1	2
27	4	4	4	3	3	4	4	3	3	2	2	4	2	3	2	2	4	3	4	2	0	0	0	0	0	0	0	0	0	0	0	0	3	2	2	2
30	4	3	4	4	4	4	4	2	2	2	2	2	2	2	1	3	4	4	4	0	2	0	0	0	0	0	0	0	0	0	0	0	4	5	3	3
28	2	3	4	4	4	4	4	4	4	4	2	3	3	3	4	3	4	4	4	0	0	0	0	0	0	0	0	0	0	0	0	0	3	2	2	3
23	2	3	3	2	4	4	3	4	4	4	2	3	2	2	3	3	3	4	3	2	0	0	0	0	2	0	0	0	0	0	0	0	3	1	2	2
31	4	2	3	4	4	0	2	4	4	1	4	4	3	4	1	3	3	1	4	0	0	0	0	0	0	0	0	0	0	0	0	0	3	1	2	2
31	4	4	4	4	4	4	4	4	4	4	4	4	4	4	4	4	4	4	4	0	0	0	0	0	0	0	0	0	0	0	0	0	3	1	2	3
38	1	2	2	0	4	2	2	4	4	4	2	2	2	1	2	3	4	1	4	0	0	0	0	0	0	0	0	0	0	0	0	0	3	2	2	2
26	4	4	4	4	4	4	4	4	4	4	4	4	4	4	3	4	4	4	4	0	0	0	0	0	0	0	0	0	0	0	0	0	3	1	2	4
27	1	2	1	1	4	2	2	2	3	3	1	3	3	2	2	2	4	3	4	0	0	0	0	0	0	0	0	0	0	0	0	0	3	1	2	2
20	0	3	0	0	1	2	1	4	2	4	2	2	1	0	3	2	2	2	4	2	3	0	2	3	1	2	2	3	0	0	0	0	3	1	2	2
20	1	1	2	1	1	0	1	1	1	1	1	4	1	0	0	0	2	0	1	3	1	1	1	0	0	0	0	0	0	0	0	0	3	1	2	2
24	1	2	2	1	3	3	3	2	2	4	4	2	4	4	3	4	4	4	4	1	0	0	0	0	0	0	0	0	0	0	0	0	3	1	2	3
27	3	4	4	3	4	3	4	4	4	3	4	4	4	4	4	4	3	3	4	2	2	0	0	0	1	0	0	0	0	0	0	0	3	3	2	2
18	3	3	3	4	4	3	3	3	4	3	3	4	3	4	4	4	3	4	4	2	0	0	0	0	0	0	0	0	0	0	0	0	3	5	3	4
39	0	0	1	1	3	3	2	2	3	2	3	2	2	4	3	2	2	2	3	0	0	0	0	0	0	0	0	0	0	0	0	0	3	3	2	3
18	4	4	4	4	4	3	4	4	4	1	4	4	3	4	4	4	4	4	4	1	0	0	0	0	0	0	0	0	0	0	0	0	3	4	3
22	4	1	2	3	4	4	4	1	3	3	4	4	4	4	4	4	4	4	4	0	0	0	0	0	0	0	0	0	0	0	0	0	4	3	3	4
23	4	4	4	4	4	4	4	4	4	4	4	4	4	4	4	4	4	4	4	0	0	0	0	0	0	0	0	0	0	0	0	0	3	1	2	3
25	4	4	4	4	4	3	4	3	4	3	3	4	3	3	2	2	4	3	3	0	0	0	0	0	0	0	0	0	0	0	0	0	3	6	2	2
21	4	4	4	3	4	4	4	4	4	4	4	4	4	4	4	4	4	4	4	0	0	0	0	0	0	0	0	0	0	0	0	0	3	4	2	3
30	4	4	4	4	4	3	4	4	4	3	3	3	3	3	4	4	3	3	4	0	0	0	0	0	0	0	0	0	0	0	0	0	3	2	2	3
29	3	4	4	2	4	3	4	4	3	3	3	3	3	2	4	4	3	3	4	3	3	2	3	2	1	0	1	0	0	0	0	0	3	5	2	4
30	1	2	3	0	4	4	2	1	3	2	2	2	2	2	2	2	3	2	3	0	0	0	0	0	0	0	0	0	0	0	0	0	3	3	2	2
23	4	3	3	4	4	3	3	3	4	3	4	3	3	4	3	3	3	2	4	1	0	0	0	0	0	0	0	0	0	0	0	0	3	1	2	3
33	4	4	4	4	4	4	4	4	4	4	4	4	4	4	4	4	4	4	4	0	0	0	0	0	0	0	0	0	0	0	0	0	3	2	3	3
25	4	4	4	4	4	4	4	4	4	4	4	4	4	4	4	4	4	4	4	0	0	0	0	0	0	0	0	0	0	0	0	0	3	1	2	3
32	0	2	2	0	4	4	3	2	4	3	4	3	2	3	2	1	2	1	4	1	0	0	0	0	0	0	0	0	0	0	0	0	2	1	2	2
31	4	4	4	3	4	4	4	4	4	3	2	4	4	2	3	2	2	3	4	0	0	1	0	0	0	0	0	0	0	0	0	0	3	2	2	3
23	0	2	4	2	4	0	3	1	4	3	2	2	2	4	4	2	2	4	4	0	0	0	0	0	0	0	0	0	0	0	0	0	3	1	2	2
21	3	3	4	4	4	3	3	4	4	3	4	4	3	3	4	3	3	3	4	1	0	0	0	0	0	0	0	0	0	0	0	0	3	4	2	3
24	2	3	2	0	4	1	4	4	0	2	1	4	4	2	1	2	1	2	3	0	0	0	0	0	0	0	0	0	0	0	0	0	3	2
23	2	3	2	4	4	2	1	1	4	4	1	0	1	1	2	1	4	3	4	0	0	0	0	0	0	0	0	0	0	0	0	0	3	1	2	2
32	4	0	2	2	2	2	2	0	0	0	4	0	0	4	0	0	0	0	0	0	0	0	0	0	0	0	0	0	0	0	0	0	2	2	2	2
28	2	2	4	4	3	2	2	2	3	2	2	3	2	2	1	2	2	2	3	0	0	0	0	0	0	0	0	0	0	0	0	0	3	2		2
23	4	3	3	3	4	2	3	2	1	1	4	2	2	4	2	2	2	1	1	1	0	0	0	0	0	0	0	0	0	0	0	0	3	2	3	4
30	4	4	4	4	4	4	2	4	4	4	2	4	2	4	4	4	4	4	4	0	0	0	0	0	0	0	0	0	0	0	0	0	1	2	2	2
21	4	4	4	4	4	4	2	2	4	4	2	4	4	2	4	2	4	4	2	3	3	3	3	3	3	0	0	0	0	0	0	0	3	4	3
20	4	2	2	2	4	2	2	2	4	2	2	4	2	2	2	2	2	2	4	2	1	2	2	1	2	2	1	0	0	0	0	0	2	2	2	2
21	4	4	4	4	4	4	4	4	4	4	4	4	4	4	3	4	4	4	4	3	0	2	3	1	0	0	0	0	0	0	0	0	3	2		3
21	3	4	0	2	4	2	0	4	4	4	4	3	3	4	4	4	4	4	4	0	1	0	3	0	3	3	0	0	0	0	0	0	3	2	2	2
27	4	4	4	4	4	4	4	4	4	4	4	4	4	4	4	4	4	4	4	1	1	0	1	0	0	0	0	0	0	0	0	0	3	1		2
17	4	4	4	1	4	4	4	4	3	4	4	4	4	4	4	4	4	4	2	2	1	1	0	1	0	0	0	0	0	0	0	0	3	2	2	3
28	4	4	4	3	4	4	4	4	4	4	4	4	4	2	4	4	4	4	4	0	0	0	0	0	0	0	0	0	0	0	0	0	2	1	2	2
27	2	3	4	2	4	1	3	1	4	2	4	4	2	2	2	2	1	2	3	0	0	0	0	0	0	0	0	0	0	0	0	0	3	5	3	4
27	4	4	4	2	4	4	4	4	4	4	4	4	3	4	4	4	4	4	4	0	0	0	0	0	0	0	0	0	0	0	0	0	3	3	2	2
25	1	2	3	1	4	3	2	2	2	2	2	2	2	2	3	2	3	2	4	2	1	0	0	0	0	0	0	0	0	0	0	0	3	2	2	2
22	4	4	4	3	4	4	4	4	4	4	4	3	3	3	3	4	4	4	4	0	0	0	0	0	0	0	0	0	0	0	0	0	4	2	2	2
35	3	2	2	1	3	3	2	3	2	2	3	2	2	1	3	1	2	3	2	0	0	0	0	0	0	0	0	0	0	0	0	0	3	1	2	2
29	3	2	2	4	4	4	2	2	3	3	3	3	3	1	2	2	2	2	3	2	1	0	0	0	0	0	0	0	0	0	0	0	3	2	2	3
24	4	2	4	1	2	1	1	2	2	1	1	2	2	2	2	2	1	2	4	1	0	0	0	0	0	0	0	0	0	0	0	0	3	2	2	2
18	0	0	4	2	4	4	4	4	4	4	4	3	4	4	3	4	4	3	4	0	0	0	0	0	0	0	0	0	0	0	0	0	3	1	2	3
31	4	1	2	3	4	2	4	4	4	4	4	3	2	4	4	4	4	4	4	0	0	0	0	0	0	0	0	0	0	0	0	0	2	3	3	4
27	4	3	4	2	3	2	3	4	4	4	2	2	3	4	2	3	2	1	4	2	0	0	0	0	0	0	0	0	0	0	0	0	3	3	3	2
19	4	4	4	4	4	4	4	4	4	4	4	3	4	3	3	4	4	4	4	2	0	0	0	0	0	0	0	0	0	0	0	0	3	4	3	4
29	3	3	4	4	3	3	2	3	3	3	3	3	3	3	3	3	4	4	4	0	0	0	0	0	0	0	0	0	0	0	0	0	3	3	2	2
22	4	4	4	4	4	4	4	4	4	4	4	4	4	4	4	4	4	4	4	2	0	0	0	0	0	0	0	0	0	0	0	0	3	4	3	2
29	4	4	4	4	4	4	4	4	4	4	4	4	4	4	4	4	4	4	4	0	0	0	0	0	0	0	0	0	0	0	0	0	3	3	2
22	4	4	4	4	4	3	4	2	4	3	3	2	2	4	2	4	2	2	3	2	0	0	0	0	1	0	0	0	0	0	0	0	3	2	2	2
26	3	3	3	4	3	3	2	3	2	1	2	2	2	3	3	2	2	1	3	3	0	0	0	2	2	0	0	0	0	0	0	0	3	3	2	3
23	1	2	2	3	4	3	3	2	4	3	4	3	3	1	2	2	3	4	4	3	3	3	0	1	0	0	0	0	0	0	0	0	3	4	2	2
31	2	1	2	2	3	2	2	3	2	2	3	3	2	3	4	4	3	4	4	0	0	0	0	0	0	0	0	0	0	0	0	0	3	2	1	2
32	0	3	2	3	4	4	4	4	4	3	2	3	3	2	2	3	2	3	4	0	0	0	2	0	0	0	0	0	0	0	0	0	3	2	2	2
20	0	1	1	1	1	0	1	1	2	0	0	1	0	1	0	1	1	1	1	0	0	0	0	0	0	0	0	0	0	0	0	0	2	1	1	1
26	2	1	2	1	3	2	1	2	3	2	3	2	2	4	3	3	2	3	4	2	1	2	1	1	0	0	0	0	1	0	0	0	3		2	2
19	2	4	3	4	3	3	2	2	4	4	3	3	3	3	3	3	2	3	4	1	2	0	0	0	0	0	0	0	0	0	0	0	3	2	1	2
28	3	3	3	3	3	1	2	3	2	3	1	2	2	2	2	2	2	2	3	0	2	0	0	0	0	0	0	0	0	0	0	0	3	2	2	2
36	4	4	4	4	4	4	3	3	4	4	4	3	4	4	3	3	4	3	3	0	0	0	0	0	0	0	0	0	0	0	0	0	4	5	3	4
17	4	4	4	4	4	4	4	4	4	4	4	4	4	4	4	4	4	4	4	1	1	0	0	0	0	0	0	0	0	0	0	0	3	2	2	2
20	2	3	2	1	3	2	3	2	4	3	3	0	2	3	1	1	2	2	2	1	0	0	0	0	0	0	0	0	0	0	0	0	3	4	2	2
21	2	3	4	4	4	3	3	4	3	4	4	3	3	2	3	3	3	3	4	1	0	1	0	0	0	0	0	0	0	0	0	0	3	1	1	2
32	4	0	4	0	4	4	4	0	4	4	0	4	4	4	4	4	4	2	4	0	0	0	0	0	0	0	0	0	0	0	0	0	3	1	2	2
18	4	3	4	4	4	4	4	3	3	2	1	3	4	3	3	3	4	3	4	0	0	1	0	0	0	0	0	0	0	0	0	0	3			2
22	2	4	3	0	4	4	4	4	4	4	0	1	4	0	4	4	4	4	4	0	0	0	0	0	0	1	0	0	0	0	0	0	3	2	2	2
25	4	4	3	4	4	4	3	3	4	4	4	3	4	4	4	4	4	4	4	0	0	0	0	0	0	0	0	0	0	0	0	0	3	1	1	2
19	1	2	2	0	3	1	2	1	3	3	3	2	2	3	2	2	2	2	3	2	2	2	2	1	1	0	0	0	0	0	0	0	3	1	1	2
41	4	4	4	3	4	3	4	4	4	4	4	4	4	4	4	4	4	3	4	0	0	0	0	0	0	0	0	0	0	0	0	0	4	4	2	2
18	4	2	2	1	4	4	3	2	3	3	2	2	2	2	2	3	3	2	4	1	0	0	0	0	0	0	0	0	0	0	0	0	3	3	2	3
24	2	4	4	3	4	3	2	4	3	3	3	3	3	4	4	3	4	2	4	1	0	1	0	0	0	0	0	0	0	0	0	0	3	1	1	2
28	2	3	2	2	4	4	4	4	2	2	2	1	1	1	1	1	4	3	4	0	0	0	0	0	0	0	0	0	0	0	0	0	3	2	2	2
27	2	3	4	1	3	3	2	2	4	2	1	1	3	1	2	3	2	3	3	2	0	0	0	0	0	0	0	0	0	0	0	0	3	1	1	2
36	2	4	3	4	3	3	3	4	4	3	2	3	2	2	3	3	3	3	4	3	3	3	3	0	0	0	0	0	0	2	3	0	3	2	2	4
35	1	2	3	1	4	3	4	4	3	4	1	4	4	1	4	4	1	3	4	0	0	0	0	0	0	0	0	0	0	0	0	0	3	1	2	2
17	2	2	2	4	4	2	2	2	2	2	2	2	2	4	2	2	2	2	2	0	0	0	0	0	0	0	0	0	0	0	0	0	3	1	2	2
21	4	4	4	4	4	4	4	4	4	4	4	4	4	4	4	4	4	4	4	0	0	0	0	0	0	0	0	0	0	0	0	0	3
29	1	1	1	2	2	2	1	2	2	2	3	1	2	3	1	1	3	2	3	0	0	0	0	0	0	0	0	0	0	0	0	0	3	5	3	4
29	2	1	3	2	3	1	2	2	1	4	2	4	2	2	4	4	4	4	4	0	0	0	0	0	0	0	0	0	0	0	0	0	3	4	2	3
18	4	4	4	4	3	4	4	4	4	4	4	4	4	4	4	4	4	4	4	0	0	0	1	0	0	0	0	0	0	0	0	0	2	2		3
33	4	4	4	4	4	4	4	4	4	4	4	4	4	4	4	4	4	4	4	0	0	0	0	0	0	0	0	0	0	0	0	0	3	1	3	3
34	4	2	3	1	2	1	2	1	1	1	2	2	2	2	1	1	2	2	2	1	0	0	0	0	0	0	0	0	0	0	0	0	3	1	1	2
35	0	3	4	1	4	4	4	4	4	4	4	4	4	4	4	3	4	3	4	0	0	0	0	0	0	0	0	0	0	0	0	0	4	2	2	4
16	1	2	2	2	3	3	3	2	2	1	0	3	2	2	1	1	0	3	3	0	0	0	0	0	0	0	0	0	0	0	0	0	1	2	2	3
23	4	4	4	4	4	4	4	1	4	4	4	4	4	4	4	4	4	4	4	0	0	0	0	0	0	0	0	0	0	0	0	0	3	5	2	3
21	3	3	4	2	4	3	2	4	4	4	2	2	3	3	4	3	2	2	3	0	0	0	0	0	0	0	0	0	0	0	0	0	3	1	2	3
21	2	4	4	1	4	2	3	3	4	4	0	2	2	0	3	2	3	3	4	3	3	2	1	0	0	0	0	0	0	0	0	0	3	2	1	2
30	3	3	3	4	4	4	3	3	3	3	3	3	3	3	3	3	3	3	4	0	0	1	0	0	0	0	0	0	0	0	0	0	3	2	3	4
22	4	4	4	4	3	4	4	4	4	4	3	4	4	3	3	3	3	3	4	0	1	0	0	0	0	0	0	0	0	0	0	0	3	1	2	2
18	2	3	0	3	3	2	0	1	4	0	2	2	0	0	0	2	1	0	3	0	0	0	0	0	0	0	0	0	0	0	0	0	3	3	2	2
26	2	2	1	1	4	2	2	2	2	2	1	4	4	1	1	1	3	2	1	3	2	2	2	0	0	0	0	0	0	0	0	0	3	2	2	2
23	1	1	2	2	3	1	2	1	2	1	1	1	2	1	1	1	1	2	1	2	0	2	0	0	0	0	0	0	0	0	0	0	4	2	2	2
26	4	4	4	4	4	4	4	4	4	4	3	4	3	3	3	4	4	3	4	0	0	0	0	0	0	0	0	0	0	0	0	0	3	2	1	2
23	3	1	3	2	4	4	3	3	4	3	2	3	4	2	3	3	4	2	4	1	0	0	0	0	0	1	0	0	0	0	0	0	4	4	3	3
31	4	4	4	4	4	3	3	2	4	3	4	4	3	4	4	3	4	3	4	2	0	0	0	0	0	0	0	0	0	0	0	0	3	2	2	2
23	2	3	3	4	4	2	2	2	4	2	4	3	3	4	0	2	2	2	3	3	3	0	0	0	1	0	0	0	0	0	0	0	3	4	2	4
23	4	4	3	3	3	2	2	3	4	3	3	3	3	3	3	3	3	3	2	1	0	0	0	0	0	0	0	0	0	0	0	0	3	1	2	2
35	1	3	3	2	3	1	3	3	3	1	1	3	1	1	1	1	1	2	2	3	0	2	0	0	0	0	0	0	0	0	0	0	3	4	2	4
17	4	4	4	4	4	4	4	4	4	4	4	4	4	4	4	4	4	4	4	0	0	0	0	0	0	0	0	0	0	0	0	0	3	1		1
23	0	3	3	2	4	0	2	3	1	2	0	1	0	0	0	0	0	0	2	0	0	0	0	0	0	0	0	0	0	0	0	0	2	1	1	2
24	3	4	4	2	4	4	2	4	4	2	2	2	2	2	3	2	4	2	4	0	0	0	0	0	0	0	0	0	0	0	0	0	3	2	2	2
26	4	4	4	3	4	4	4	3	4	4	4	3	3	4	3	3	3	3	4	1	0	0	0	0	0	0	0	0	0	0	0	0	3	4	3	4
22	3	3	2	2	4	3	2	3	4	2	2	2	2	3	2	2	2	2	2	2	2	0	0	0	0	0	0	0	0	0	0	0	3	1	2	2
24	4	4	4	4	4	4	4	4	4	4	3	4	4	4	4	4	4	4	4	0	0	0	0	0	0	0	0	0	0	0	0	0	3	4	2	2
33	1	4	4	2	4	4	4	4	4	4	4	2	4	4	4	4	4	4	4	0	0	0	0	0	0	0	0	0	0	0	0	0	3	1	1	2
18	1	1	2	1	1	2	1	2	1	2	1	2	1	2	1	1	1	1	2	0	0	0	0	0	0	0	0	0	0	0	0	0	3	2	1	2
30	1	1	2	1	2	1	1	1	1	1	0	1	1	1	1	2	2	1	2	1	2	0	1	1	1	0	0	0	0	0	0	0	2	2	1	3
27	4	4	4	4	4	4	4	4	4	3	4	4	4	4	4	4	4	4	4	1	0	0	0	0	0	0	0	0	0	0	0	0	3	1	2	3
27	1	4	4	4	4	4	4	1	4	1	2	2	2	1	2	2	1	4	4	0	0	0	0	0	0	0	0	0	0	0	0	0	3	1	1	2
33	0	2	2	0	1	0	0	2	2	0	0	0	0	0	2	1	0	2	1	3	2	2	2	2	0	1	1	1	1	2	2	0	4	4	1	1
24	2	2	1	0	1	3	2	2	0	0	2	1	2	2	1	1	1	1	1	2	0	0	0	0	0	0	0	0	0	0	0	0	3	3	2	3
26	1	3	2	0	4	4	1	4	2	1	0	2	1	2	3	2	2	2	1	2	1	2	0	0	0	0	0	0	0	0	0	0	3	1	1	2
24	3	3	4	2	3	3	3	3	3	3	3	3	3	3	3	3	3	3	3	0	0	0	0	0	0	0	0	0	0	0	0	0	4	2	2	2
26	4	4	4	2	4	4	4	2	2	2	4	4	2	4	4	4	4	4	4	0	0	0	0	0	0	0	0	0	0	0	0	0	4	5	3	4
20	4	4	4	4	4	4	4	4	4	4	4	4	4	4	4	4	4	4	4	0	0	0	0	0	0	0	0	0	0	0	0	0	3	2	2	2
20	1	3	3	4	3	3	3	3	4	4	4	4	4	4	3	3	3	3	4	0	0	0	0	0	0	0	0	0	0	0	0	0	3	2	3	3
20	1	2	4	4	4	4	3	4	4	4	4	4	4	4	4	4	2	3	4	0	0	2	0	0	0	0	0	0	0	0	0	0	3	2		3
24	2	4	4	4	4	3	4	4	4	4	4	4	3	4	2	4	4	4	4	0	1	3	0	0	1	0	0	0	0	0	0	0	3	2	1	2
26	0	2	1	0	3	2	4	4	2	1	2	4	2	4	2	2	2	1	2	3	0	1	1	0	0	0	0	0	1	0	1	0	2	2
31	4	3	2	4	4	1	3	4	4	3	4	3	3	4	2	2	1	2	4	0	0	0	0	0	0	0	0	0	0	0	0	0	3	6	2	4
30	2	1	2	2	2	2	1	1	2	1	1	2	1	1	2	1	2	1	2	0	0	0	0	0	0	0	0	0	0	0	0	0	3	1	3	3
24	4	4	4	4	4	4	4	4	4	4	4	4	4	4	4	4	4	4	4	0	0	0	0	0	0	0	0	0	0	0	0	0	4	6	2	3
38	4	3	3	3	4	4	4	3	4	4	3	4	3	4	4	3	3	3	4	0	1	0	0	0	0	0	0	0	0	0	0	0	3	1	2	4
27	3	3	2	3	4	3	2	2	3	2	1	2	2	1	2	2	3	2	3	2	1	0	1	1	0	0	0	0	0	1	0	0	3	2	3	2
30	1	2	1	1	1	1	2	1	1	1	0	0	1	0	2	2	1	1	1	3	2	3	2	2	2	0	0	0	0	0	0	0	3	2	2	2
21	4	4	2	4	4	4	4	4	4	4	4	4	4	4	4	4	4	4	4	0	0	0	0	0	0	0	0	0	0	0	0	0	3	2	2	2
19	4	2	2	2	4	2	2	1	4	2	4	2	1	3	4	2	4	2	4	0	0	0	0	0	0	0	0	0	0	0	0	0	3	2		3
20	0	0	2	2	4	4	4	4	4	4	4	0	4	4	4	4	4	4	4	0	0	0	0	0	0	0	0	0	0	0	0	0	3	1	1	2
21	2	4	4	1	4	4	4	3	3	3	2	1	3	2	4	2	3	4	4	2	0	0	0	0	0	0	0	0	0	0	0	0	3	1	1	2
27	1	2	3	0	2	2	2	1	0	0	0	2	2	0	0	2	2	1	1	3	1	2	0	2	3	1	2	0	0	0	0	0	3		2	1
27	4	2	3	2	4	2	2	2	2	2	2	2	2	4	2	2	2	2	2	1	0	0	0	0	0	0	0	0	0	0	0	0	3	1	2	4
26	0	3	3	3	4	3	4	4	4	4	4	3	2	4	4	4	4	3	4	0	0	0	0	0	0	0	0	0	0	0	0	0	3	2	2	3
37	1	2	3	1	2	3	3	4	2	1	2	2	2	3	3	3	2	2	2	0	0	0	0	0	0	0	0	0	0	0	0	0	3	2	2	2
21	4	4	4	4	4	4	4	4	4	4	4	4	4	4	4	4	4	4	4	0	0	0	0	0	0	0	0	0	0	0	0	0	2	2	2	2
23	3	2	2	1	2	3	3	3	2	2	3	2	3	3	1	2	3	2	2	2	0	0	0	0	0	0	0	0	0	0	0	0	4	5	3	4
16	2	3	2	4	4	4	1	2	4	2	4	3	2	4	3	2	1	2	4	0	3	0	0	0	0	0	0	0	0	0	0	0	3	2	1	2
30	4	2	4	2	4	2	4	4	4	3	2	2	2	2	4	4	2	2	4	1	0	0	0	1	1	1	0	0	0	0	0	0	4	3	2	4
29	3	4	4	2	4	2	4	4	4	2	2	4	2	3	2	2	2	2	4	0	0	2	0	0	0	0	0	0	0	0	0	0	2	2	2	3
30	4	2	3	4	1	3	2	3	2	1	3	1	3	1	4	3	2	4	3	0	0	0	0	0	0	0	0	0	0	0	0	0	3	4	2	4
23	4	3	4	4	4	4	3	4	4	4	4	4	4	4	4	4	4	3	4	0	0	0	0	0	0	0	0	0	0	0	0	0	3	1	2	2
24	4	1	4	4	4	4	4	4	4	4	4	4	4	4	4	4	4	4	4	0	0	0	0	0	0	0	0	0	0	0	0	0	1	2	1	2
27	4	4	4	4	4	4	4	4	4	4	4	4	4	4	4	4	4	4	4	0	0	0	0	0	0	0	0	0	0	0	0	0	3	1	2	1
28	4	3	4	4	4	3	2	1	3	4	4	4	2	4	1	1	4	4	4	0	0	0	0	0	0	0	0	0	0	0	0	0	3	1	1	2
24	4	4	4	4	4	4	4	4	4	4	4	3	3	4	4	4	3	4	4	0	0	0	0	0	0	0	0	0	0	0	0	0	4	6	3	4
25	4	4	4	3	4	3	4	4	4	3	4	3	2	3	4	4	4	3	4	0	0	0	0	0	0	0	0	0	0	0	0	0	3	1	1	2
32	4	3	4	1	4	4	4	3	4	4	4	4	4	4	4	4	3	4	4	0	0	0	0	0	0	0	0	0	0	0	0	0	3	2	2	2
19	4	4	4	4	4	4	4	4	4	4	4	4	4	4	4	4	4	4	4	0	0	0	0	0	0	0	0	0	0	0	0	0	3	2		2
21	0	4	4	4	4	2	4	4	2	3	4	2	1	0	0	1	2	1	2	0	0	0	0	0	0	0	0	0	0	0	0	0	3	2	2	2
26	4	4	4	1	4	4	4	4	4	3	4	4	4	4	4	4	3	3	4	0	0	0	0	0	0	0	0	0	0	0	0	0	3	2	2	2
27	3	3	4	4	4	4	2	4	4	4	3	4	4	4	4	4	4	4	4	0	0	0	0	0	0	0	0	0	0		0	0	2	2
32	0	1	4	1	4	2	1	4	4	1	2	4	3	2	4	4	2	3	4	0	0	0	0	0	0	0	0	0	0	0	0	0	3	2	2	2
23	4	3	3	4	4	3	2	3	4	3	4	3	2	4	2	3	4	2	3	2	0	0	0	0	0	0	0	0	0	0	0	0	3	2	2	2
38	0	1	1	0	4	2	2	2	4	2	1	2	2	2	2	1	0	2	4	0	0	0	0	0	0	0	0	0	0	0	0	0	2	2	1	2
19	4	4	4	2	4	4	4	2	4	4	2	2	4	4	4	4	4	4	4	0	0	0	0	0	0	0	0	0	0	0	0	0	3	2		2
30	4	4	2	1	2	3	3	4	4	3	1	2	2	2	2	2	2	2	2	1	0	1	0	0	0	0	0	0	0	0	0	0	2	2	1	2
26	4	2	3	2	4	3	3	3	3	2	4	3	2	4	3	2	3	3	4	2	2	2	2	1	0	0	0	0	1	0	0	0	3	2	1	2
30	4	2	4	4	4	2	2	3	4	4	4	2	2	4	1	2	2	2	4	0	0	0	0	0	0	0	0	0	0	0	0	0	3	2	2	3
33	4	3	3	2	4	3	3	3	3	3	3	3	3	2	2	2	3	2	4	0	0	0	0	0	0	0	0	0	0	0	0	0	4	2	2	3
23	0	2	2	4	2	3	2	2	2	4	3	2	2	3	2	2	2	2	3	0	0	0	0	0	0	0	0	0	0	0	0	0	2	1	2	2
26	2	1	2	1	2	2	2	2	3	2	4	2	2	2	2	2	2	2	2	1	1	1	1	0	0	0	0	0	1	0	0	0	3	2	2	2
32	4	4	4	4	4	4	4	4	4	4	4	4	4	4	4	4	4	4	4	0	0	0	0	0	0	0	0	0	0	0	0	0	4	5	3	4
37	2	3	3	4	3	4	4	4	4	4	4	4	4	4	4	4	4	4	4	0	0	0	0	0	0	0	0	0	0	0	0	0	2	2	1	2
19	4	3	2	3	4	3	2	2	3	2	3	4	2	3	2	2	4	3	4	0	0	0	0	0	0	0	0	0	0	0	0	0	3	1		3
27	0	2	2	1	3	4	2	2	2	1	1	2	3	3	3	2	2	2	2	1	0	0	1	0	1	0	0	0	0	0	0	0	3	4	2	2
21	2	1	2	1	1	1	2	2	1	0	0	1	0	0	0	2	3	1	3	2	0	2	0	0	2	0	0	0	0	0	0	0	2	2	2	3
24	1	2	2	2	1	2	2	3	2	2	1	1	3	1	1	1	3	2	3	1	0	1	0	0	0	0	0	0	0	0	0	0	4	5	2	2
15	4	4	4	4	4	3	4	4	3	4	3	4	3	3	3	3	4	3	3	1	0	0	0	0	0	0	0	0	0	0	0	0	3		1	2
33	1	1	1	2	2	1	2	2	2	2	2	2	2	2	1	1	2	1	1	3	3	2	1	1	0	0	0	0	0	0	0	2	4	5	2	3
25	2	2	4	4	4	4	3	3	4	3	4	3	3	4	4	4	3	3	4	0	0	0	0	0	0	0	0	0	0	0	0	0	3	2	2	4
18	4	3	4	4	4	4	3	4	4	4	4	4	3	4	3	4	4	4	4	0	0	0	0	0	0	0	0	0	0	0	0	0	3	1	2	3
22	1	2	2	1	2	2	1	2	1	1	1	2	1	1	1	1	2	1	2	2	0	2	0	0	0	0	0	0	0	0	0	0	3
34	1	2	3	1	3	1	3	0	2	3	1	1	1	2	3	3	1	2	4	0	0	0	0	0	0	0	0	0	0	0	0	0	3	1	2	2
26	3	1	3	1	3	1	2	2	1	2	1	1	1	1	1	1	1	1	1	0	0	0	0	1	1	1	1	0	0	0	0	0	3	4	2	2
26	3	3	3	3	3	3	3	3	3	3	3	3	3	4	4	4	2	2	3	0	0	0	0	0	0	0	0	0	0	0	0	0	3	1	2	2
37	1	1	1	0	2	1	2	2	2	1	2	2	2	1	1	1	2	2	2	0	0	0	0	0	0	0	0	0	0	0	0	0	4	4	2	2
24	4	4	4	1	4	4	4	4	4	4	4	4	4	4	4	4	4	4	4	1	1	0	0	0	0	0	0	0	0	0	0	0	4	2	2	3
20	4	3	4	3	4	3	2	2	4	3	3	4	3	3	0	1	2	2	3	1	1	0	0	0	0	0	0	0	0	0	0	0	3	2	2	2
36	0	2	3	1	2	3	1	3	1	1	2	3	3	2	1	1	2	2	4	0	0	0	0	0	0	0	0	0	0	0	0	0	2	2	2	3
21	4	4	4	3	4	4	4	4	4	4	3	4	3	4	4	4	4	4	4	1	1	0	0	0	0	0	0	0	0	0	0	0	3	3	2	2
27	2	2	4	4	4	4	4	4	4	4	4	4	4	4	4	4	4	4	4	0	0	0	0	0	0	0	0	0	0	0	0	0	3	2	3	3
20	0	4	3	4	4	4	2	3	3	4	2	2	2	4	4	4	4	4	4	0	0	0	0	0	0	0	0	0	0	0	0	0	3	3	2
40	4	4	4	4	4	1	4	4	4	4	4	4	4	4	4	4	4	4	4	3	0	0	0	0	0	0	0	0	0	0	0	0	1	2		2
25	4	4	4	4	4	4	4	4	4	4	4	4	4	3	3	4	3	3	4	0	0	0	0	0	0	0	0	0	0	0	0	0	3	6		4
32	3	4	2	1	4	4	2	2	4	3	1	2	3	4	3	2	4	3	4	1	0	0	0	0	0	0	0	0	0	0	0	0	3	2	2	2
22	4	4	4	4	4	4	4	4	4	4	4	4	4	3	3	4	4	4	4	0	0	0	0	0	0	0	0	0	0	0	0	0	3	1	3	2
28	1	4	4	4	3	3	2	3	2	2	1	3	2	1	4	3	3	2	2	0	0	0	0	0	0	0	0	0	0	0	0	0	3	2	2	2
29	4	4	4	4	4	4	3	4	4	4	4	4	3	4	4	4	3	4	4	1	0	1	0	0	0	0	0	0	0	0	0	0	3	3	3	3
22	4	4	4	4	4	4	3	4	4	4	4	3	3	4	4	4	4	4	4	1	0	0	0	0	0	0	0	0	0	0	0	0	4	5	2	2
32	4	4	3	2	3	4	4	2	3	2	4	3	3	4	3	3	2	2	3	0	0	1	0	0	0	0	0	0	0	0	0	0	3	4	2	3
21	2	1	1	2	2	1	2	2	2	2	1	1	1	2	1	2	1	1	2	0	0	0	0	0	0	0	0	0	0	0	0	0	3	1		2
26	4	3	4	2	3	3	3	3	3	3	4	4	4	3	3	3	3	3	4	0	1	0	0	0	0	0	0	0	0	0	0	0	3	4	2	2
32	3	3	4	4	4	4	4	3	4	3	4	3	3	4	3	3	4	3	4	0	2	0	0	0	0	0	0	0	0	0	0	0	3	6	3	4
23	4	3	3	2	4	2	2	4	2	4	2	2	4	4	2	2	4	2	4	0	0	0	0	0	0	0	0	0	0	0	0	0	3	2	3	2
31	0	2	1	0	4	4	4	4	4	4	2	3	4	2	2	3	3	2	4	0	0	0	0	0	0	0	0	0	0	0	0	0	3	2	2	2
22	4	4	4	4	4	3	3	3	4	3	4	4	3	3	2	3	4	3	4	2	1	0	0	0	0	0	0	0	0	0	0	0	3	4	2	4
33	1	2	1	4	4	2	2	3	1	2	2	1	4	2	3	2	0	3	4	0	0	0	0	0	0	0	0	0	0	0	0	0	3	2	3	2
26	4	4	4	4	4	4	4	3	4	3	4	3	4	4	3	3	4	3	4	0	0	0	0	0	0	0	0	0	0	0	0	0	4	3	3
19	4	4	4	3	4	4	4	4	4	4	3	3	2	3	4	4	3	4	4	0	0	0	0	0	0	0	0	0	0	0	0	0	3	1	2	2
27	4	4	4	2	4	2	4	4	3	4	4	4	4	4	4	4	4	4	3	0	0	0	0	0	0	0	0	0	0	0	0	0	3	2	3	3
25	4	4	3	4	4	3	4	4	4	4	4	3	4	4	3	4	3	3	4	2	1	0	0	0	0	0	0	0	0	0	0	0	3	4		3
22	4	4	4	4	4	4	4	3	4	4	4	3	3	4	4	4	4	4	4	0	0	0	0	0	0	0	0	0	0	0	0	0	3	3	1	2
28	2	1	2	1	2	2	2	2	2	2	2	2	2	2	1	2	2	2	2	2	2	0	1	0	0	0	0	0	0	0	0	0	3	3	2	2
21	3	3	2	3	3	4	4	3	3	1	4	1	3	3	4	1	3	3	3	2	1	0	0	0	0	0	0	0	0	0	0	0	2	2	2	3
32	2	4	4	3	4	3	4	4	4	3	4	4	3	4	4	4	4	4	4	2	0	2	0	2	1	0	0	0	0	0	0	0	3	2	2	4
22	4	3	4	3	3	3	3	2	3	2	4	3	2	4	4	2	2	2	4	2	2	0	0	0	0	0	0	0	0	0	0	0	3		2	2
18	0	3	4	3	4	3	3	3	4	4	2	4	2	2	2	3	3	2	4	2	0	1	0	0	1	1	0	0	0	0	0	0	3	2	1	1
37	1	4	4	3	4	1	3	4	4	3	4	3	3	4	3	4	1	2	4	0	0	0	0	0	0	0	0	0	0	0	0	0	2	2	2	3
27	4	4	4	4	4	4	4	4	4	4	4	3	4	3	3	4	4	3	4	0	0	3	3	0	0	0	0	0	0	0	0	0	3	2	2	2
26	1	2	3	1	4	3	2	2	4	2	2	2	2	2	3	2	4	3	3	1	1	0	0	1	0	0	0	0	0	0	0	0	2	1	1	1
25	4	4	4	4	4	3	3	4	3	4	4	4	3	4	4	4	3	4	4	0	0	0	0	0	0	0	0	0	0	0	0	0	4	2	2	2
24	3	3	3	4	4	3	3	3	4	2	3	2	2	2	2	1	4	3	3	0	0	0	0	0	0	0	0	0	0	0	0	0	3	2	1	2
27	4	4	4	4	4	3	4	4	4	4	4	4	4	4	4	4	4	4	4	3	2	2	2	0	0	0	0	0	0	0	0	0	4	2	3	3
25	0	1	0	0	1	0	0	1	1	1	1	3	3	4	0	0	4	4	4	0	2	2	0	0	0	0	0	0	1	0	1	0	4	6	1	2
25	2	4	2	4	3	3	2	4	4	3	4	4	2	4	3	1	3	4	4	0	0	0	0	0	0	0	0	0	0	0	0	0	3	2	2	2
24	1	3	3	1	3	2	2	3	3	2	3	3	2	2	2	2	2	3	3	0	0	0	0	0	0	0	0	0	0	0	0	0	3	2	1	2
39	2	3	4	2	2	2	3	4	2	2	3	3	2	4	3	4	2	2	2	0	0	1	1	0	0	0	0	0	0	0	0	0	2	2		2
22	1	1	2	3	2	1	3	1	3	2	1	1	3	2	1	2	3	1	4	1	1	0	0	0	0	0	0	0	0	0	0	0	4	2	2	2
27	2	2	4	0	4	4	4	0	4	4	0	4	4	0	3	2	4	4	4	0	0	0	0	0	0	0	0	0	0	0	0	0	2	1	3	2
25	2	3	4	2	2	1	1	2	1	1	3	2	1	3	2	1	1	2	2	2	1	0	0	1	0	0	0	0	0	0	0	0	3	2	2	3
28	4	4	4	4	4	4	4	4	4	4	4	4	4	4	4	4	4	4	4	0	0	0	0	0	0	0	0	0	0	0	0	0	3	2	2	2
23	4	4	4	4	2	2	2	3	4	2	4	4	4	4	4	4	4	3	2	3	1	0	0	0	0	0	0	0	0	0	0	0	3	1	2	2
43	2	4	3	1	4	2	1	4	2	3	3	3	2	4	2	3	1	2	3	0	0	0	0	0	0	0	0	0	0	0	0	0	3	2	3	3
23	4	4	1	2	4	1	2	4	1	4	4	3	2	3	1	0	0	2	4	0	0	1	1	0	0	0	0	1	0	0	0	0	3	2	2	2
21	4	4	4	3	4	4	4	4	4	4	3	4	4	3	4	4	4	4	4	0	0	0	0	0	0	0	0	0	0	0	0	0	4	5	2	3
33	4	4	4	4	4	4	4	3	4	4	2	4	4	3	2	2	4	2	2	2	0	1	1	1	0	0	0	0	0	0	0	0	3	2	1	2
20	4	4	4	4	4	4	4	4	4	4	4	4	3	3	4	3	4	3	4	0	0	0	0	0	0	0	0	0	0	0	0	0	3	2	2	2
30	2	2	2	2	3	3	2	2	2	2	2	2	3	2	2	2	3	3	2	2	0	2	0	0	0	0	0	0	0	0	0	0	4	5	3	4
25	3	4	4	2	4	4	4	4	3	4	4	4	4	4	4	4	4	4	4	0	0	0	0	0	0	0	0	0	0	0	0	0	3	1	2	2
30	4	4	4	4	4	4	4	4	4	4	4	4	4	4	4	4	4	4	4	0	0	0	0	0	0	0	0	0	0	0	0	0	2	4	2	3
32	4	2	2	4	3	2	1	0	4	1	3	0	3	4	0	0	3	0	3	1	1	1	0	0	0	0	0	0	0	0	0	0	3	4	2	2
18	2	4	4	3	4	3	3	3	4	3	4	4	2	3	3	2	4	4	4	1	0	1	0	0	0	0	0	0	0	0	0	0	3	1	1	2
22	3	4	4	4	4	4	4	4	4	4	4	4	3	4	4	4	4	4	4	0	0	0	0	0	0	0	0	0	0	0	0	0	3	2	2	2
21	2	2	4	3	4	2	4	4	2	4	2	4	2	4	4	3	2	3	4	0	0	0	0	0	0	0	0	0	0	0	0	0	3	1		3
25	4	2	3	4	3	3	3	4	3	2	4	2	2	4	1	2	3	1	3	0	0	0	0	0	0	0	0	0	0	0	0	0	2	2	1	1
22	2	1	2	3	2	2	2	2	2	2	3	2	2	2	2	2	2	2	2	2	1	2	2	2	2	2	2	0	0	0	0	1	3	5	2	3
20	1	3	3	1	3	3	4	3	4	4	1	4	4	1	4	4	4	4	4	1	0	3	0	0	0	0	0	0	0	0	0	0	2	3	2	2
22	4	4	4	4	4	4	4	4	4	4	4	4	4	4	4	4	4	4	4	0	0	1	0	0	0	0	0	0	0	0	0	0	3	1	2	1
21	3	1	3	3	4	2	2	1	3	3	3	3	2	2	3	3	2	3	3	2	1	0	1	0	0	0	0	0	0	0	0	0	3	6	2	2
25	2	3	2	4	4	2	2	2	4	3	1	3	4	3	3	3	4	3	4	2	0	2	0	0	0	0	0	0	0	0	0	0	2	1	2	2
25	4	4	4	4	4	4	4	4	4	4	4	4	4	4	4	4	4	4	4	0	0	0	0	0	0	0	0	0	0	0	0	0	4	2	2	2
28	4	4	4	4	4	4	4	4	4	4	4	4	4	4	4	4	4	4	4	0	0	0	0	0	0	0	0	0	0	0	0	0	3	6	2	2
24	4	4	4	2	4	4	4	4	4	4	4	4	4	4	4	4	4	4	4	0	0	0	0	0	0	0	0	0	0	0	0	0	3	2	2	3
30	0	3	4	0	4	2	4	4	2	2	0	4	1	3	4	3	4	4	2	3	3	0	3	0	0	0	0	0	1	0	0	0	2	3	2	1
29	3	3	3	2	4	4	3	2	3	3	2	2	2	3	3	2	4	4	4	3	2	0	0	0	0	0	0	0	0	0	0	0	3	3	2	3
26	4	4	4	2	4	2	2	4	4	2	2	2	2	2	2	4	2	4	4	0	0	0	0	0	0	0	0	0	0	0	0	0	2	2	2	2
25	3	3	4	2	4	4	4	4	4	4	4	4	4	4	4	4	4	4	4	3	2	0	1	0	1	0	0	0	0	0	0	0	3	4	2	2
24	0	2	4	0	3	3	2	3	3	3	3	2	3	3	4	3	3	2	3	2	0	0	0	0	0	0	0	0	0	0	0	0	3	3	3	4
29	1	1	0	1	2	2	1	1	2	1	2	3	2	2	2	1	3	0	4	0	0	0	0	0	0	0	0	0	0	0	0	0	3	2	2	4
34	4	2	4	4	3	4	4	4	3	4	4	4	4	4	4	4	4	3	4	0	0	0	0	0	0	0	0	0	0	0	0	0	3	6	3	2
38	4	3	2	3	4	4	1	4	3	1	3	1	3	3	4	1	4	3	4	1	1	0	0	0	0	0	0	0	0	0	0	0	3	1	1	2
23	4	3	4	3	4	3	4	4	4	3	3	3	3	3	4	4	3	2	4	0	1	0	0	0	0	0	0	0	0	0	0	0	4	6	3	4
28	4	4	4	2	4	4	4	4	4	4	4	4	2	4	3	4	3	4	4	1	0	1	0	0	0	0	0	0	0	0	0	0	3		1	2
34	1	2	1	4	2	1	0	4	1	1	4	2	4	1	2	3	2	4	4	0	0	1	0	0	0	0	0	0	0	0	0	0	3	1	1	2
36	2	3	2	2	3	3	2	3	3	2	2	2	3	2	3	2	3	3	3	2	0	1	0	0	0	0	0	0	0	0	0	0	3		2	4
19	3	4	4	1	4	3	2	4	4	2	3	3	3	3	2	4	2	3	4	2	0	0	0	1	0	0	0	0	1	0	0	0	3		2	1
20	1	3	4	2	4	3	4	4	4	4	2	4	4	3	3	3	3	4	4	0	0	0	0	0	0	0	0	0	0	0	0	0	3	2	1	2
21	4	4	4	2	4	4	3	4	4	3	4	3	4	4	4	4	4	3	4	0	0	0	0	0	0	0	0	0	0	0	0	0	3	2	2	2
23	4	4	4	4	4	3	3	4	4	3	3	4	4	3	3	3	3	4	3	0	0	0	0	0	0	0	0	0	0	0	0	0	2	1	1	1
33	4	3	4	4	4	4	4	4	4	4	4	4	4	4	3	4	3	3	4	0	0	0	0	0	0	0	0	0	0	0	0	0	3	4	2	3
34	1	2	2	0	3	2	2	1	1	0	0	0	0	1	1	1	1	1	0	0	0	0	1	0	0	0	0	0	0	0	0	0	3	1	2	3
26	4	4	4	4	4	4	4	4	4	4	4	4	4	4	4	4	4	4	4	0	0	0	0	0	0	0	0	0	0	0	0	0	3	1	2	2
23	4	3	4	2	4	4	4	4	4	4	4	4	4	3	4	4	4	4	4	1	0	0	0	0	0	0	0	0	0	0	0	0	3	3	2	4
25	4	3	2	2	3	3	3	3	4	3	4	2	3	4	3	3	3	3	4	0	0	0	0	0	0	0	0	0	0	0	0	0	3	2	2	2
22	2	1	2	0	1	2	1	0	1	1	3	1	1	1	0	2	1	1	1	3	2	2	0	0	0	0	0	0	0	0	0	0	3		2	2
29	4	4	4	4	4	4	4	4	4	4	4	4	4	4	4	4	4	4	4	3	3	3	3	0	0	0	0	0	0	0	0	0	3	1	2	3
22	4	2	4	4	4	4	4	4	4	3	3	2	3	3	3	4	4	4	4	2	0	0	0	0	1	0	0	0	0	0	0	0	3	2	3	3
20	2	2	2	4	3	4	2	3	3	2	3	3	3	3	3	3	3	2	3	0	2	2	0	0	0	0	0	0	0	0	0	0	3			3
24	4	4	4	4	4	4	4	3	3	3	4	4	4	4	4	3	4	4	4	1	0	0	0	0	0	0	0	0	0	0	0	0	3	2	2	4
20	4	4	4	4	4	3	2	4	4	4	2	4	3	4	4	4	3	4	4	0	0	0	0	0	0	0	0	0	0	0	0	0	3	1	1	2
28	2	2	1	0	2	1	1	2	2	1	0	1	2	1	1	2	2	0	2	0	0	0	1	0	0	0	0	0	0	0	0	0	3	1	1	1
32	4	4	4	4	4	4	4	4	4	4	4	4	4	4	4	4	4	4	4	0	0	0	0	0	0	0	0	0	0	0	0	0	4	5	3	4
30	2	3	4	1	4	2	2	1	4	1	2	3	3	4	3	3	3	2	2	0	0	0	0	0	0	0	0	0	0	0	0	0	3	2	2	2
31	2	3	2	1	3	3	2	2	3	3	1	2	2	2	1	1	2	2	4	0	0	0	0	0	0	0	0	0	0	0	0	0	3	2	2	3
23	0	1	1	0	1	1	1	1	0	0	0	0	1	1	1	1	1	1	1	0	0	1	0	0	0	0	0	0	0	0	0	0	3	1	2	2
19	2	3	4	1	4	3	2	1	4	2	3	3	1	2	2	3	3	2	4	0	0	0	0	0	0	0	0	0	0	0	0	0	3	2		4
15	1	3	2	3	2	3	3	4	2	2	3	3	3	3	2	3	2	2	3	2	0	2	0	0	0	0	0	0	0	0	0	0	3	1	2	2
30	2	4	4	3	4	2	3	4	4	3	3	4	3	3	2	4	3	4	4	1	0	0	0	0	0	0	0	0	0	0	0	0	3	3	3	2
18	4	4	4	4	4	4	4	4	4	4	4	4	4	4	4	4	4	4	4	0	0	0	0	0	0	0	0	0	0	0	0	0	3		2	2
29	1	1	2	1	4	2	4	3	4	3	1	2	1	1	3	4	4	2	4	1	0	1	0	0	0	0	0	0	0	0	0	0	3	2	1	2
22	1	1	1	1	3	1	4	1	1	1	3	1	1	1	1	1	1	1	1	3	3	3	1	3	3	0	0	0	0	0	0	0	3	2	2	2
30	4	4	4	4	4	4	4	4	4	3	4	4	4	4	4	4	4	4	4	0	0	0	0	0	0	0	0	0	0	0	0	0	2	2	2	2
32	1	2	3	1	4	3	2	2	4	3	4	3	3	4	3	2	2	3	4	0	0	0	0	0	0	0	0	0	0	0	0	0	3	1	2	2
27	4	3	4	4	4	4	4	4	4	2	4	4	4	4	4	4	4	3	4	0	0	0	0	0	0	0	0	0	0	0	0	0	4	6	3	3
18	0	2	3	3	4	2	2	2	3	2	2	3	2	3	3	2	2	2	4	1	0	0	0	0	0	0	0	0	0	0	0	0	2	1	1	2
22	4	4	4	4	4	4	4	4	4	4	4	4	4	4	4	4	4	4	4	0	0	0	0	0	0	0	0	0	0	0	0	0	3	2	3	3
30	1	2	2	2	1	1	2	2	1	1	2	3	1	2	1	2	1	2	3	0	0	0	0	0	0	0	0	0	0	0	0	0	3	4	2	3
29	3	3	2	3	4	4	3	4	4	3	3	3	3	3	3	3	3	3	4	0	0	0	0	0	0	0	0	0	0	0	0	0	3	4	2	3
27	1	3	3	4	4	4	3	4	4	4	3	4	3	3	4	4	4	3	4	1	0	0	0	0	0	0	0	0	0	0	0	0	3	2	2	3
25	4	4	4	2	4	4	4	4	4	4	2	2	2	2	2	2	4	4	4	0	0	0	0	0	0	0	0	0	0	0	0	0	3	2	2	2
22	3	4	3	1	4	4	3	4	2	2	1	2	2	1	1	2	2	1	2	0	0	0	0	0	0	0	0	0	0	0	0	0	3	2	2	2
15	1	4	4	4	4	4	4	4	2	1	4	2	2	4	4	4	4	4	4	3	0	0	0	0	0	0	0	0	0	0	0	0	3	1		2
17	4	4	4	4	4	4	4	4	4	4	4	4	4	4	4	4	4	3	4	1	1	0	0	0	0	0	0	0	0	0	0	0	3		2
24	4	2	2	4	1	1	3	2	2	2	3	1	2	3	3	3	3	3	2	1	0	2	2	2	1	2	2	0	0	0	0	0	3	2	2	4
28	2	2	0	1	2	0	0	0	2	2	2	2	3	0	0	0	2	2	0	0	0	3	0	0	1	0	0	0	0	0	0	0	2			2
24	3	4	4	4	3	3	4	3	4	4	4	3	3	4	4	3	4	3	4	0	0	1	0	0	0	0	0	0	0	0	0	0	3	2	2	2
21	4	3	4	4	4	4	4	4	4	4	4	4	4	4	4	4	3	4	4	0	0	0	0	0	0	0	0	0	0	0	0	0	2	2	2	2
17	4	4	4	3	4	4	4	4	4	4	4	4	4	4	4	3	4	4	4	0	0	0	0	0	0	0	0	0	0	0	0	0	3	2	3	3
28	2	1	1	1	2	2	2	1	1	1	2	2	2	2	0	1	1	1	2	1	0	0	0	0	0	0	0	0	0	0	0	0	3	1	3	3
31	2	3	4	2	4	2	3	2	2	1	2	2	2	2	3	3	2	3	2	3	2	1	0	0	0	0	0	0	0	1	1	0	3	2	3	4
21	3	1	1	1	3	3	3	1	3	1	1	1	2	1	3	1	3	1	4	0	0	0	0	0	0	0	0	0	0	0	0	0	3	4	3	2
25	4	3	3	4	4	4	4	3	4	4	4	3	4	4	3	4	4	3	4	0	0	0	0	0	0	0	0	0	0	0	0	0	4	1	3	3
40	0	1	1	1	1	3	1	2	2	1	1	1	2	2	1	1	2	1	2	0	0	0	0	0	0	0	0	0	0	0	0	0	3	1	2	2
29	2	1	1	3	3	2	3	1	1	2	1	1	2	1	1	1	2	1	2	0	0	0	0	0	0	0	0	0	0	0	0	0	4	6	3	3
26	2	2	2	0	2	2	2	2	3	1	3	2	1	3	1	1	1	2	3	1	0	0	0	0	0	0	0	0	0	0	0	0	3	2	2	3
22	2	2	4	1	3	2	2	2	3	1	1	2	2	1	2	2	2	1	4	0	0	0	0	0	0	0	0	0	0	0	0	0	3	2	2	1
36	4	4	4	4	4	4	4	4	4	4	4	4	4	4	4	4	4	4	4	0	0	0	0	0	0	0	0	0	0	0	0	0	3	6	2	2
33	0	1	2	2	2	2	3	3	2	3	2	3	4	1	4	4	4	2	2	3	3	3	0	0	0	0	0	0	0	0	0	0	3	1	2	2
27	2	4	3	0	4	4	4	3	4	3	1	2	3	2	3	3	4	3	4	0	0	0	0	0	1	0	0	0	0	0	0	0	3	4	2	2
24	4	4	3	3	4	3	2	4	4	3	2	3	3	4	3	2	4	2	4	0	0	0	0	0	0	0	0	0	0	0	0	0	3	2	2	2
24	3	3	4	4	4	3	3	3	4	4	3	4	3	3	3	3	3	3	2	2	2	1	1	0	0	0	0	0	0	1	1	1	3	4	2	2
21	0	0	2	0	2	2	0	1	0	0	0	0	0	0	0	1	0	1	0	0	0	0	0	0	0	0	0	0	0	0	0	0	3	1	2	2
37	1	2	2	0	4	2	2	0	4	3	2	2	3	2	2	2	4	4	4	0	0	0	0	0	0	0	0	0	0	0	0	0	3	1	2	2
21	2	2	2	0	2	2	2	2	2	2	2	2	2	2	2	2	2	2	2	1	0	0	0	0	0	0	0	0	0	0	0	0	4	4	2	2
20	4	4	4	4	4	3	4	4	4	3	4	4	3	4	4	4	3	4	3	0	0	0	1	0	0	0	0	0	0	0	0	0	3	6	2	2
23	2	2	1	1	3	4	1	2	4	4	1	1	4	2	1	1	2	2	4	0	0	0	0	0	0	0	0	0	0	0	0	0	3	2	3	3
29	0	1	2	2	1	1	1	2	1	2	2	1	2	1	1	2	1	1	2	0	0	0	0	0	0	0	0	0	0	0	0	0	1		1	1
23	4	4	4	4	4	4	4	4	4	4	4	4	3	4	4	4	3	4	4	0	0	0	0	0	0	0	0	0	0	0	0	0	3	1	2	2
23	2	2	2	1	2	2	2	1	2	1	3	2	1	3	3	2	2	1	3	0	1	0	0	0	0	0	0	0	0	0	0	0	3	2		2
23	2	2	2	1	2	2	2	2	3	2	0	1	2	1	2	3	2	2	2	2	0	1	1	1	1	1	0	0	0	1	0	0	3	1	1	1
25	4	2	1	4	3	0	1	1	2	2	1	4	1	1	0	1	2	2	3	2	1	0	0	0	0	0	0	0	0	0	0	0	3	4	2	2
21	3	4	1	4	4	3	4	4	4	4	4	4	4	4	3	2	4	4	4	0	0	0	0	0	0	0	0	0	0	0	0	0	2	1	1	2
29	3	3	3	4	3	3	3	3	3	3	4	3	3	4	3	3	3	3	3	0	0	0	0	0	0	0	0	0	0	0	0	0	3	1	2	2
25	4	3	4	4	4	3	4	4	4	4	4	4	4	4	3	4	4	2	4	0	0	0	0	0	0	0	0	0	0	0	0	0	3		3	4
21	4	3	4	1	4	2	3	4	4	3	4	4	3	3	4	4	4	4	4	2	2	0	0	1	1	1	1	0	0	0	0	0	3	2	3	3
20	0	4	4	3	4	4	4	4	4	4	4	4	4	4	4	4	4	4	4	0	0	0	0	0	0	0	0	0	0	0	0	0	3	2	2	2
29	2	3	3	1	4	4	4	4	3	4	3	4	4	3	4	4	4	4	4	2	1	1	0	0	0	0	0	0	0	0	0	0	4	4	2	3
20	2	3	2	1	2	3	3	4	3	1	3	2	0	1	2	3	4	2	3	3	3	2	1	0	0	0	0	0	0	0	0	0	3	1	2	2
27	3	4	4	3	3	3	3	4	4	4	2	4	4	3	2	3	3	4	4	2	0	1	0	1	1	0	0	0	0	1	0	0	3	1	2	2
27	2	4	4	3	4	3	4	3	4	3	4	4	3	4	4	3	4	4	4	1	0	0	0	0	0	0	0	0	0	0	0	0	3	1	1	2
21	4	4	4	4	4	4	4	4	4	4	4	4	4	4	4	4	4	4	4	3	3	3	3	0	0	0	0	0	0	0	0	0	3	1	1	2
24	4	2	3	1	4	4	3	3	2	1	3	3	2	3	3	3	2	3	4	2	0	2	0	0	1	0	0	0	0	0	0	0	3	4	3	4
22	2	4	4	4	4	4	3	3	4	4	4	4	4	4	4	4	4	4	4	1	0	0	0	0	0	0	0	0	0	0	0	0	3	2	2	3
31	2	4	3	3	4	4	4	4	4	3	3	3	3	3	3	3	4	3	4	1	2	0	0	0	0	0	0	0	0	0	0	0	4	1	2	2
25	3	2	4	3	3	1	2	2	3	1	1	3	1	3	2	2	2	2	3	0	0	0	0	0	0	0	0	0	0	0	0	0	3	4	2	2
26	4	4	3	2	4	4	4	4	4	4	3	3	2	4	4	3	4	4	4	0	0	0	0	0	0	0	0	0	0	0	0	0	3	1	2	2
20	4	4	4	4	4	4	4	4	4	4	4	4	4	4	4	4	4	4	4	0	0	0	0	0	0	0	0	0	0	0	0	0	3	3	2	3
30	2	2	3	2	2	0	2	1	1	2	2	2	2	0	0	1	2	2	2	0	0	0	0	0	0	0	0	0	0	0	0	0	2	1	2	2
19	4	2	2	4	2	2	2	2	2	3	2	2	2	3	2	2	2	1	2	1	1	2	1	0	0	1	0	0	0	0	0	0	3	1	2
36	4	4	4	4	4	4	4	4	4	4	3	4	4	3	4	4	4	4	4	0	0	0	0	0	0	0	0	0	0	0	0	0	3	2	2	4
34	0	0	0	1	0	1	1	0	0	0	2	0	0	0	0	0	1	0	1	0	0	0	0	0	0	0	0	0	0	1	0	0	3	4	2	2
27	2	1	2	0	1	0	1	0	1	1	4	3	2	3	4	3	4	4	4	2	1	2	2	0	0	0	0	0	0	0	0	0	3	2	2	3
26	4	4	4	4	3	2	3	4	4	2	2	3	2	2	3	3	3	3	2	0	0	0	0	0	0	0	0	0	0	0	0	0	3	2	2	3
24	4	4	4	2	4	4	4	4	4	4	4	3	4	4	4	4	4	4	4	1	0	0	0	0	0	0	0	0	0	0	0	0	3	2	1	2
32	3	3	4	1	2	1	1	4	3	2	4	4	4	4	3	3	4	3	2	0	0	0	0	0	0	0	0	0	0	0	0	0	3	1	1	2
21	4	4	4	4	4	4	4	4	4	4	4	4	4	4	4	4	4	4	4	0	0	0	0	0	0	0	0	0	0	0	0	0	3	2	2	2
30	4	4	4	4	4	4	4	4	4	4	4	4	4	4	3	4	4	4	4	0	0	0	0	0	0	0	0	0	0	0	0	0	4	4	3	3
15	2	3	1	2	3	3	2	2	3	3	3	3	3	3	2	3	3	3	4	2	0	1	0	1	1	1	0	0	0	0	0	0	3	4	2	2
33	4	2	4	4	4	4	4	4	4	4	4	4	4	4	4	4	4	4	4	0	0	0	0	0	0	0	0	0	0	0	0	0	3	1	2	2
14	3	3	3	3	4	3	2	2	4	0	4	4	2	4	4	3	1	3	2	0	0	0	0	0	0	0	0	0	0	0	0	0	2	1	2	1
21	4	3	4	4	4	3	4	4	4	3	4	4	3	4	4	4	4	4	4	0	0	0	0	0	0	0	0	0	0	0	0	0	3		2	2
31	3	3	2	2	4	2	2	2	4	3	3	3	3	3	3	3	3	3	3	0	0	0	0	0	0	0	0	0	0	0	0	0	3	1	2	2
17	1	4	2	1	4	1	1	1	3	1	2	2	2	2	2	2	2	3	3	2	0	0	0	0	0	0	0	0	0	0	0	0	1	2	3	2
30	0	1	1	0	2	2	2	2	2	2	2	2	2	3	2	3	3	2	2	1	0	0	0	0	0	0	0	0	0	0	0	0	4		2	3
25	4	3	3	4	4	3	4	4	4	3	4	1	3	4	3	4	4	4	4	2	0	0	0	0	0	0	0	0	0	0	0	0	4	6	3	3
32	2	3	3	1	2	1	3	3	2	1	1	2	2	2	2	2	1	2	1	1	1	1	0	0	0	0	0	0	0	0	2	0	3	2	2	3
35	1	2	2	1	3	2	3	3	2	2	1	3	2	1	2	2	2	2	3	0	0	0	0	0	0	0	0	0	0	0	0	0	3	2	2	2
27	4	3	3	3	3	3	4	4	4	4	4	4	4	4	4	4	4	3	4	0	0	0	0	0	0	0	0	0	0	0	0	0	4	2	2	2
20	3	2	3	2	4	2	3	3	3	2	3	3	4	1	2	3	4	3	3	2	3	3	0	0	0	0	0	0	0	0	0	0	3	1	1	2
29	2	3	2	1	2	3	1	1	2	2	1	1	1	1	1	1	3	1	4	0	0	0	0	0	0	0	0	0	0	0	0	0	4	2	2	3
39	0	2	4	4	4	4	4	4	4	4	4	4	4	4	4	4	4	4	4	0	0	1	0	0	0	0	0	0	0	0	0	0	4	1	2	2
21	4	4	4	4	4	2	2	2	4	2	2	2	4	2	4	2	3	2	4	0	0	0	0	0	0	0	0	0	0	0	0	0	3	2	2	2
18	4	3	4	2	2	0	2	4	2	0	4	3	1	4	1	4	0	1	0	3	3	0	0	0	0	0	0	0	0	0	0	0	3	1	2	2
29	4	4	4	1	4	4	4	4	4	4	1	4	4	1	4	4	4	4	4	3	0	0	0	0	0	0	0	0	0	0	0	0	4	4	2	2
26	4	4	4	2	4	4	4	4	4	2	4	4	4	4	4	4	4	4	4	3	0	0	0	0	0	0	0	0	0	0	0	0	2	1	3	1
24	3	4	4	3	3	2	4	4	3	3	4	4	4	4	4	4	3	3	3	2	2	2	2	1	1	0	0	0	0	0	0	0	3	3	2	2
27	0	2	2	0	3	2	2	2	3	2	2	2	2	2	2	2	2	2	3	1	0	0	0	0	0	0	0	0	0	0	0	0	3	4	2	3
26	4	4	4	4	4	4	4	4	4	4	4	4	4	4	4	4	4	4	4	0	0	0	0	0	0	0	0	0	0	0	0	0	3	1	2	2
27	2	2	3	1	4	2	1	2	4	2	1	4	1	2	1	2	2	2	2	0	0	2	0	0	0	0	0	0	0	0	0	0	3	1	2	2
28	4	3	3	3	4	2	2	3	3	2	4	3	2	4	3	3	3	3	2	1	0	2	0	0	0	0	0	0	0	0	0	0	3	2	3	4
41	3	2	2	2	2	2	2	3	2	2	1	2	2	1	1	1	1	1	1	0	0	0	0	0	0	0	0	0	0	0	0	0	3	5	2	2
32	1	1	1	0	4	4	3	0	4	4	0	3	4	1	3	1	3	3	4	0	0	0	0	0	0	0	0	0	0	0	0	0	3	1	2	2
31	4	3	4	3	4	4	3	4	4	3	4	3	3	4	4	3	3	3	4	0	0	0	0	0	0	0	0	0	0	0	0	0	4	5	3	4
28	2	4	4	4	4	4	4	4	4	3	2	2	1	3	4	2	3	3	4	0	0	2	0	0	0	0	0	0	0	0	0	0	3	4	2	3
25	4	4	3	4	4	4	2	4	4	4	4	3	4	4	2	4	4	4	4	0	0	0	0	0	0	0	0	0	0	0	0	0	3	5	3
16	4	4	4	4	4	4	4	4	4	4	4	4	4	4	4	4	4	4	4	2	0	0	0	0	0	0	0	0	0	0	0	0	3	1	2	2
29	3	4	3	3	3	3	3	2	2	3	3	3	3	3	3	3	3	3	4	0	0	0	0	0	0	0	0	0	0	0	0	0	3	1	2	3
29	1	3	1	1	3	4	2	1	4	1	1	4	2	1	1	2	3	1	4	0	0	2	0	0	0	0	0	0	0	0	0	0	3	1	2	2
23	4	4	4	1	4	3	4	4	4	3	3	4	3	3	3	3	3	4	4	1	1	1	1	0	0	0	0	0	0	0	0	0	3	4	2	4
22	4	2	4	2	4	4	4	4	4	4	3	2	4	4	3	3	3	3	4	0	0	0	0	0	0	0	0	0	0	0	0	0	3			2
25	2	3	2	3	4	2	2	2	3	3	2	1	2	3	2	2	2	2	2	0	0	0	0	0	0	0	0	0	0	0	0	0	3		2	2
38	4	3	4	4	4	4	4	4	3	3	2	3	3	4	3	4	4	3	4	1	1	1	1	0	0	0	0	0	0	0	0	0	4	5	3	4
25	2	3	3	2	3	3	4	4	4	4	4	3	3	4	4	4	4	4	4	0	0	0	0	0	0	0	0	0	0	0	0	0	3	1	2	2
26	2	2	1	2	2	2	2	2	4	4	2	2	2	4	4	4	4	4	4	3	0	0	0	0	0	0	0	0	0	0	0	0	3	2	2	2
24	2	4	4	2	4	2	4	4	2	1	1	4	2	1	2	2	2	4	4	0	0	0	0	0	0	0	0	0	0	0	0	0	3	1	1	2
23	4	4	4	4	4	3	4	4	4	4	4	4	4	4	4	4	4	4	4	2	1	0	1	0	0	0	0	0	0	0	0	0	4		3	4
34	4	4	4	4	4	4	4	4	1	4	1	3	4	2	4	4	3	4	2	0	0	0	0	0	0	0	0	0	0	0	0	0	4	2	2	2
19	4	4	3	2	4	3	2	4	4	4	3	3	3	4	3	3	4	3	4	0	0	0	0	0	0	0	0	0	0	0	0	0	3	4	2	3
28	4	4	3	3	4	4	4	4	4	4	4	3	4	4	4	4	4	3	4	0	0	0	0	0	0	0	0	0	0	0	0	0	2	2	2	3
32	4	4	4	4	4	4	4	4	4	4	4	4	4	4	4	4	4	4	4	0	0	0	0	0	0	0	0	0	0	0	0	0	4	2	2	4
21	4	3	3	1	3	2	3	3	2	2	0	1	4	1	1	3	2	3	3	1	0	2	0	0	1	0	0	0	0	0	0	0	3	2	2	2
17	2	2	4	4	2	1	2	3	4	1	4	2	1	2	4	4	2	2	2	0	2	0	0	0	0	0	0	0	0	0	0	0	3	1	2	2
21	3	4	4	2	4	3	3	4	3	3	2	4	3	2	4	4	4	4	3	1	0	0	0	0	1	0	0	0	0	0	0	0	3	2	2	3
27	4	3	2	3	3	3	2	3	4	2	4	2	2	4	3	3	3	2	3	2	0	0	0	0	0	0	0	0	0	0	0	0	3	5	3	4
32	4	4	4	3	4	4	4	4	4	4	4	4	4	2	3	3	2	4	4	0	0	3	0	0	0	0	0	0	0	0	0	0	1	2	2	2
27	3	3	3	2	3	2	3	3	3	3	2	3	4	3	3	3	2	3	4	2	1	0	0	0	0	0	0	0	0	0	0	0	3	2	2	2
28	3	3	4	2	3	2	3	3	2	2	2	2	3	3	1	2	2	2	1	2	0	1	0	0	0	0	0	0	0	0	0	0	3	1	2	2
20	1	1	1	1	1	1	1	0	1	1	2	1	1	1	1	1	1	1	2	0	0	0	0	0	0	0	0	0	0	0	0	0	3	4	2	2
24	4	4	4	4	4	4	4	4	4	4	4	4	4	4	4	4	4	4	4	0	0	0	0	0	0	0	0	0	0	0	0	0	3	1	2	2
26	4	4	3	4	4	4	3	3	4	4	4	4	4	4	4	4	4	4	4	2	0	0	0	0	0	0	0	0	0	0	0	0	4	6	3	4
30	4	2	4	4	3	1	2	2	1	1	4	1	2	1	0	2	2	3	2	0	0	0	0	0	0	0	0	0	0	0	0	0	3	1	2	2
28	4	4	4	4	4	3	4	4	4	3	4	4	4	4	3	4	3	4	3	2	1	0	0	0	0	0	0	0	0	0	0	0	3	2	2	4
33	4	4	4	3	3	3	4	4	4	4	3	4	3	4	3	4	3	2	3	0	0	0	0	0	0	0	0	0	0	0	0	0	4	1	2	3
25	4	4	3	2	4	4	4	4	4	4	4	4	3	2	4	4	4	3	4	0	0	0	0	0	0	0	0	0	0	0	0	0	3	2	3	4
23	2	3	2	1	3	2	1	2	1	1	2	2	2	1	1	1	2	2	2	0	0	0	0	0	0	0	0	0	0	0	0	0	3	1	2	2
37	3	3	3	4	4	3	3	3	3	4	2	3	3	2	3	3	4	2	3	0	0	1	0	0	0	0	0	0	0	0	0	0	4	4	2	3
21	4	4	4	4	4	4	4	4	4	4	4	4	4	4	4	4	4	4	4	0	0	0	0	0	0	0	0	0	0	0	0	0	2	2	2	2
19	4	4	4	4	4	4	4	4	4	4	4	4	4	4	4	4	4	4	4	0	0	1	0	0	0	0	0	0	0	0	0	0	3	2	2	2
23	1	1	1	1	4	3	1	2	3	3	3	2	3	3	1	1	4	3	4	0	0	0	0	0	0	0	0	0	0	0	0	0	3	2	2	4
36	2	3	3	2	2	2	2	2	2	2	2	2	2	2	2	2	2	2	2	3	1	3	3	2	1	0	0	0	0	0	0	0	4	1	2	4
23	4	3	4	1	4	2	4	1	1	3	1	4	1	1	2	4	2	1	3	0	0	0	0	0	0	0	0	0	0	0	0	0	3	2	1	2
30	3	2	3	4	3	3	3	3	3	2	2	2	3	2	1	2	3	3	3	0	0	0	0	0	0	0	0	0	0	0	0	0	3	1	2	3
29	1	2	1	1	4	3	2	2	4	3	3	2	0	0	0	0	0	0	0	0	0	0	0	0	0	0	0	0	0	0	0	0	3	1	2	2
23	4	4	4	3	4	3	4	4	4	4	4	3	3	2	3	3	3	4	4	2	2	1	0	0	0	0	0	0	0	0	0	0	4	3	3	4
33	0	2	1	0	0	0	0	0	0	1	1	2	2	1	2	0	1	1	2	0	0	0	0	0	0	0	0	0	0	0	0	0	2	1	2	2
27	4	3	2	3	4	4	3	3	4	3	4	3	3	4	3	3	3	3	4	0	0	0	0	0	0	0	0	0	0	0	0	0	3		2	4
22	1	4	4	4	4	4	4	4	4	4	4	4	4	4	4	4	4	4	4	0	0	0	0	0	0	0	0	0	0	0	0	0	3	4	2	2
23	4	1	2	0	4	4	3	4	4	3	0	2	2	0	4	0	2	2	4	1	1	0	0	0	0	0	0	0	0	0	0	0	1	1	2	2
29	4	4	4	4	4	4	4	4	4	4	4	4	4	4	4	4	4	4	4	0	0	0	0	0	0	0	0	0	0	0	0	0	3	3	2	4
28	4	2	4	3	3	4	2	4	4	2	4	4	2	4	4	2	4	4	2	1	0	0	1	1	0	0	0	0	0	0	0	0	3	1	1	2
15	4	3	4	4	4	4	4	4	4	4	4	2	2	4	1	1	1	2	4	1	1	0	1	0	1	0	0	0	0	0	0	0	3	1		2
23	4	3	4	3	3	3	3	3	3	3	3	3	2	4	3	3	3	2	2	1	1	0	0	0	0	0	0	0	0	0	0	0	3	4	1	2
30	4	3	1	0	3	1	1	1	1	2	1	1	1	1	1	1	1	1	2	2	2	2	2	0	0	0	0	0	0	0	0	0	3	4	2	3
33	0	2	2	1	1	1	2	2	1	1	1	2	2	1	2	2	2	2	1	0	0	0	0	0	0	0	0	0	0	0	0	0	3	1	3	3
29	4	3	3	3	4	3	3	3	4	3	1	3	3	4	3	3	3	3	3	0	0	0	0	0	0	0	0	0	0	0	0	0	3	2	2	2
22	2	2	3	3	3	1	3	2	3	2	3	3	1	1	1	2	2	2	3	0	0	0	0	0	0	0	0	0	0	0	0	0	3	4	1	3
22	1	4	4	4	4	3	4	4	3	4	4	4	3	4	4	4	3	4	4	0	0	0	0	0	0	0	0	0	0	0	0	0	3		2	3
34	4	2	3	4	4	3	4	3	3	2	4	3	3	4	3	2	3	4	4	0	0	0	0	0	0	0	0	0	0	0	0	0	3	2	2	2
20	4	4	4	4	4	4	4	4	4	4	4	4	4	4	4	4	4	4	4	2	0	0	0	0	0	0	0	0	0	0	0	0	2	1		4
28	4	4	4	4	4	4	4	4	4	4	4	4	4	4	3	4	4	4	4	0	0	0	0	0	0	0	0	0		0	0	0	3	2	3	3
32	2	3	2	2	3	3	2	2	4	4	4	4	2	4	3	4	3	3	4	0	0	0	0	0	0	0	0	0	0	0	0	0	4	4	2	4
21	1	0	0	0	0	0	0	1	0	1	0	1	1	0	1	1	1	0	0	3	3	2	1	1	0	0	0	0	0	0	0	0	3	4	1	2
29	2	1	2	2	1	1	2	2	1	2	1	1	1	2	1	3	2	1	2	0	0	0	0	0	0	0	0	0	0	0	0	0	3	1	1	2
21	3	4	4	3	4	4	4	4	4	4	4	4	4	4	4	4	4	4	4	0	0	1	0	0	0	0	0	0	0	0	0	0	3	2	2	3
25	4	3	3	4	3	3	3	3	3	3	3	3	3	3	3	3	3	3	3	0	0	0	0	0	0	0	0	0	0	0	0	0	3	6	3	2
23	4	4	4	4	4	4	4	4	4	4	4	4	4	4	4	4	4	4	4	1	0	0	0	0	0	0	0	0	0	0	0	0	3	6	2	4
23	4	4	4	4	4	4	4	4	4	4	3	4	4	4	4	4	4	4	4	0	0	0	2	0	0	0	0	0	0	0	0	0	3	6	3	3
28	4	2	4	3	4	3	3	4	4	3	4	3	3	4	4	4	3	4	4	0	0	0	0	0	0	0	0	0	0	0	0	0	4	1	2	2
31	4	2	3	1	3	3	3	4	3	2	2	3	3	3	3	3	2	3	3	3	1	1	0	0	0	0	0	0	0	0	0	0	3	4	2	3
29	4	3	2	4	4	4	2	4	4	4	4	4	3	4	4	4	4	4	4	0	0	0	0	0	0	0	0	0	0	0	0	0	3	1	2	3
38	4	4	4	4	4	4	4	4	4	4	4	4	4	4	4	4	4	4	4	0	0	0	0	0	0	0	0	0	0	0	0	0	3	1	2	2
23	4	3	4	4	4	4	4	4	4	3	3	4	3	4	4	4	4	4	4	0	0	0	2	0	0	0	0	0	0	0	0	0	3	2	2	2
15	4	4	4	4	4	4	4	4	4	4	4	4	4	4	4	4	4	4	4	0	0	0	0	0	0	0	0	0	0	0	0	0	2	2	2	3
27	4	4	4	4	4	4	4	4	4	4	4	4	4	4	4	4	4	4	4	0	0	0	0	0	0	0	0	0	0	0	0	0	3	2	2	4
25	0	0	1	0	1	1	1	0	1	0	0	1	0	0	0	0	1	1	1	3	1	0	1	1	1	0	0	0	0	0	0	0	3	2	2	2
20	3	1	2	1	1	1	2	1	3	1	3	2	1	3	1	2	1	1	3	2	1	0	0	0	0	0	0	0	0	0	0	0	3	2	1
32	1	3	1	2	4	4	2	2	2	3	1	2	4	2	2	2	2	2	3	0	0	0	0	0	0	0	0	0	0	0	0	0	3	2	2	4
34	3	3	4	3	4	3	2	2	3	2	3	3	1	4	2	3	3	1	3	2	2	1	1	0	0	0	0	0	0	0	0	0	3	2	3	4
29	4	4	4	2	4	4	4	4	4	4	4	4	4	3	4	4	4	4	4	0	0	0	0	0	0	0	0	0	0	0	0	0	3	1	2	2
28	4	2	2	3	4	4	2	4	4	2	1	2	4	4	2	2	4	2	2	3	0	2	1	0	0	0	0	0	0	0	0	1	1	1	2	2
35	4	4	4	3	3	3	3	3	3	3	3	3	3	3	3	3	3	3	3	0	0	0	0	0	0	0	0	0	0	0	0	0	3	2	2	2
18	4	2	4	4	4	3	4	4	4	4	4	3	3	4	3	4	3	3	4	0	0	0	0	0	0	0	0	0	0	0	0	0	3	1	3	4
23	1	3	4	0	4	4	2	0	4	3	4	3	3	2	4	3	4	2	3	2	1	1	0	0	0	0	0	0	0	0	0	0	3	2	2	2
29	2	2	1	4	3	2	1	0	3	2	3	2	3	4	3	1	3	3	4	0	0	0	0	0	0	0	0	0	0	0	0	0	2	3	2	2
21	4	4	4	4	4	4	4	4	4	4	4	4	4	4	4	4	4	4	4	1	0	0	0	0	0	0	0	0	0	0	0	0	3	1	2	2
35	2	2	2	2	3	2	2	2	2	2	0	3	2	1	2	2	2	2	2	3	3	3	0	0	2	0	0	0	0	0	0	0	3		2
26	3	1	2	2	2	4	2	2	2	4	0	2	4	4	2	3	4	3	4	2	3	0	0	0	0	0	0	0	0	0	0	0	3	2	2	2
32	1	0	2	1	4	2	0	4	2	2	0	3	4	0	3	0	4	4	0	3	3	0	0	0	0	0	0	0	0	0	0	0	3		1	2
20	1	1	2	0	1	1	1	1	2	1	0	1	2	0	0	1	1	1	1	0	0	0	0	1	0	0	0	0	0	0	0	0	3	1	1	2
26	4	3	4	3	4	3	4	3	4	4	4	3	4	2	2	2	3	2	3	1	0	1	0	0	0	0	0	0	0	0	0	0	4	5	3	4
25	4	4	4	3	4	4	3	3	4	4	4	4	3	4	4	3	3	3	3	1	0	0	0	0	0	0	0	0	0	0	0	0	3	1	2	2
28	4	3	4	4	3	3	4	4	4	4	3	3	3	4	3	4	4	3	4	0	0	0	0	0	0	0	0	0	0	0	0	0	4	4	2	4
29	1	1	1	0	2	1	1	1	1	1	0	1	1	0	1	1	1	1	1	0	0	0	0	0	0	0	0	0	0	0	0	0	3	3	2	2
33	2	2	2	2	3	2	2	2	4	2	2	2	2	2	2	2	2	2	2	1	0	0	0	0	0	0	0	0	0	0	0	0	3	2	2	3
26	0	1	2	1	1	2	3	2	2	1	4	2	1	2	2	1	2	2	3	0	0	0	0	0	0	0	0	0	0	0	0	0	3	1	2	3
23	4	4	4	4	4	4	4	4	4	4	4	4	4	4	4	3	4	3	4	2	0	1	0	0	1	0	0	0	0	2	0	1	3	2	1	1
24	4	2	2	3	2	1	2	2	1	2	4	3	2	3	4	2	2	1	2	1	0	0	0	0	0	0	0	0	0	0	0	0	3	2	2	2
25	3	3	4	4	4	2	3	3	4	4	3	3	3	3	4	2	4	4	4	0	0	0	0	0	0	0	0	0	0	0	0	0	3	2	3	3
30	4	4	4	4	4	4	4	4	4	4	4	4	4	4	4	4	4	4	4	0	0	0	0	0	0	0	0	0	0	0	0	0	3	4	2	2
24	4	4	4	4	4	4	4	4	4	4	4	4	4	4	4	4	4	4	4	0	0	0	0	0	0	0	0	0	0	0	0	0	3	2	1	2
23	3	3	3	2	4	3	3	3	4	2	3	4	2	3	3	3	4	3	4	0	0	0	0	0	0	0	0	0	0	0	0	0	3	4	2	2
21	4	4	4	4	4	4	4	4	4	4	4	4	4	4	4	4	4	4	4	0	0	0	0	0	0	0	0	0	0	0	0	0	4	4	2	4
24	1	1	2	1	2	2	1	2	2	1	2	2	1	2	1	1	2	2	2	0	0	0	0	0	0	0	0	0	0	0	0	0	3	6	2	2
38	4	4	4	4	4	4	4	4	4	4	3	3	4	4	4	4	4	4	4	0	0	0	0	0	0	0	0	0	0	0	0	0	3	4	2	2
28	4	4	4	2	4	2	4	0	4	0	4	4	3	2	1	0	2	1	2	0	0	0	0	0	0	0	0	0	0	0	0	0	2	1	2	3
39	1	1	2	4	3	4	2	1	2	2	1	1	1	1	1	1	3	1	2	0	0	0	0	0	0	0	0	0	0	0	0	0	3	2	2	2
25	4	4	3	2	3	3	3	3	3	2	4	2	3	3	3	3	4	4	3	0	0	0	0	0	0	0	0	0	0	0	0	0	3	2	2	2
15	4	4	4	4	4	4	4	4	4	4	4	4	4	4	4	4	4	4	4	0	0	0	0	0	0	0	0	0	0	0	0	0	1	4	1	1
17	0	2	0	4	1	1	2	2	2	1	1	1	1	1	1	1	1	1	1	0	0	0	0	0	0	0	0	0	0	0	0	0	3	4	3	1
26	4	4	4	4	4	4	4	4	4	4	4	4	4	4	4	4	4	4	4	0	0	0	0	0	0	0	0	0	0	0	0	0	3	2	3	2
37	3	3	1	1	3	1	0	3	2	0	2	3	1	1	2	1	2	4	3	2	0	0	0	0	0	0	0	0	0	0	0	0	3	2	1	1
22	4	4	3	3	4	4	4	3	4	4	3	3	4	3	4	3	4	4	4	0	0	0	0	0	0	0	0	0	0	0	0	0	3	2	2	3
22	4	2	4	4	4	4	3	2	4	4	4	2	4	4	3	3	4	4	4	0	0	0	0	0	0	0	0	0	0	0	0	0	3	2	3	3
24	2	3	3	1	2	3	3	4	2	3	2	3	3	2	2	3	3	2	3	0	0	2	0	0	0	0	0	0	0	0	0	0	3	2	2	4
20	2	3	3	1	2	0	2	3	3	3	1	2	3	1	1	3	2	2	3	1	1	3	2	0	1	1	0	0	1	0	0	0	2	2	2	1
20	4	2	4	4	4	4	3	4	4	4	4	4	4	4	3	3	4	4	4	2	1	1	2	0	0	0	0	0	0	0	0	0	2	5	3
33	4	4	4	4	4	4	4	4	4	4	4	2	4	4	4	4	4	4	4	0	0	0	0	0	0	0	0	0	0	0	0	0	3	2		3
23	4	4	4	4	4	4	4	4	4	4	4	4	4	4	4	4	4	4	4	0	0	0	0	0	0	0	0	0	0	0	0	0	3	2	2	2
18	4	3	2	2	4	3	3	3	4	4	2	3	2	3	3	3	4	3	4	0	0	0	0	0	0	0	0	0	0	0	0	0	3	2	2	2
36	3	4	2	3	4	4	3	4	4	4	3	4	4	3	3	3	4	3	4	0	0	0	0	0	0	0	0	0	0	0	0	0	3	4	2	2
31	3	4	4	4	4	3	4	4	3	3	2	4	3	3	3	3	3	3	3	3	2	3	3	0	1	0	0	0	0	0	0	0	3	2	2	2
30	2	3	3	1	2	3	3	3	3	2	3	3	2	2	2	3	2	3	3	0	1	0	0	0	0	0	0	0	0	0	0	0	3	4		4
30	2	2	2	1	2	3	2	1	1	1	2	2	3	2	4	1	3	2	2	3	1	1	0	1	1	0	0	0	0	0	0	0	4	1	2	2
20	2	3	1	1	4	4	4	3	4	3	4	4	4	4	4	4	3	4	4	0	0	2	0	0	0	0	0	0	0	0	0	0	3	3	3	4
28	4	3	4	4	4	4	4	4	4	4	4	4	4	4	4	4	4	4	4	0	0	0	0	0	0	0	0	0	0	0	0	0	2	1	2	2
24	3	4	4	2	4	4	2	4	4	4	4	3	3	4	4	4	4	4	4	2	1	0	1	0	0	0	1	0	0	0	0	0	3	4	2	3
24	3	3	3	2	4	3	3	3	3	2	3	2	2	3	3	3	3	2	3	2	1	0	0	0	0	0	0	0	0	0	0	0	3	2	2	2
31	1	1	1	0	1	0	0	0	1	0	0	0	0	1	0	1	1	1	1	3	3	3	3	3	3	3	1	0	0	3	3	3	3	6	3	4
24	4	4	4	3	4	3	3	3	4	2	4	3	3	4	4	4	4	3	4	0	0	0	0	0	0	0	0	0	0	0	0	0	2	2	1	2
34	4	2	1	1	2	2	2	2	2	0	4	2	2	4	2	2	2	1	2	2	2	0	2	0	0	0	0	0	0	0	0	0	4	5	3	4
26	4	4	4	4	4	4	4	4	4	4	4	4	4	4	4	4	4	4	4	0	0	0	0	0	0	0	0	0	0	0	0	0	3	2	2	2
29	2	4	4	4	4	4	4	4	4	4	4	4	4	3	4	4	4	4	4	0	1	0	0	0	0	0	0	0	0	0	0	0	3	1	2	1
19	4	4	4	4	4	3	4	4	4	4	4	4	3	4	4	4	3	3	4	1	0	0	0	0	0	0	0	0	0	0	0	0	3	4	2	2
24	4	2	1	1	2	1	4	1	2	2	1	4	1	4	1	4	1	2	1	1	1	1	0	0	1	0	0	0	0	0	0	0	3	4	2	4
18	4	4	4	4	4	4	3	3	4	4	4	3	4	4	4	4	4	2	4	2	0	0	0	0	0	0	0	0	0	0	0	0	3	6	1	3
16	4	4	4	3	4	4	4	4	4	4	4	4	4	4	4	4	4	4	1	3	3	2	0	1	0	1	0	0	0	0	0	0	2	2	3	4
23	4	4	3	4	4	4	3	4	4	4	3	3	2	2	4	2	4	2	4	2	1	1	0	0	1	0	0	0	0	0	0	0	4		2	3
30	2	1	2	1	2	2	4	1	3	2	2	3	1	2	1	2	3	3	4	2	2	0	0	0	0	0	0	0	0	0	0	0	2	1	1	2
18	0	1	2	0	4	2	2	1	1	2	2	4	1	2	1	2	1	2	4	0	0	0	0	0	0	0	0	0	0	0	0	0	2	2	1	3
22	4	4	4	2	4	4	4	4	4	4	4	4	4	4	4	4	4	4	4	0	0	0	0	0	0	0	0	0	0	0	0	0	3	2	2	2
22	0	2	2	0	3	2	3	2	2	2	4	4	4	3	3	4	4	4	4	0	0	0	0	0	0	0	0	0	0	0	0	0	3	2	1	2
18	1	2	2	2	4	3	3	3	4	4	3	3	3	3	2	3	2	2	4	3	1	1	0	0	0	0	0	0	0	0	0	0	3	1	1	1
18	4	3	3	1	4	4	2	4	3	1	4	3	2	3	0	2	3	3	3	0	0	0	0	0	0	0	0	0	0	0	0	0	3	1		2
21	0	0	2	0	0	0	2	0	0	0	0	2	2	0	0	2	2	2	0	0	0	0	0	0	0	0	0	0	0	0	0	0	3	2		4
18	4	4	4	4	4	4	4	4	4	4	4	4	4	4	4	4	4	4	4	0	1	2	0	0	1	0	0	0	0	0	0	0	2	1	1	2
28	4	4	4	4	4	4	3	4	4	4	4	4	4	4	4	4	4	3	4	0	0	0	0	0	0	0	0	0	0	0	0	0	3	4	2	2
29	1	2	1	1	3	3	2	1	2	2	1	2	4	4	1	2	4	3	4	0	0	0	0	0	0	0	0	0	0	0	0	0	3	2	3	3
33	1	1	2	2	2	3	1	1	1	2	2	1	1	2	2	1	2	1	2	0	0	0	0	0	0	0	0	0	0	0	0	0	4	2	2	2
25	3	3	3	3	4	4	3	4	4	3	3	3	2	3	3	3	4	3	4	0	0	0	0	0	0	0	0	0	0	0	0	0	3	4	2	2
23	2	2	2	1	1	1	2	1	1	3	3	1	3	2	3	1	1	2	1	0	0	0	0	0	0	0	0	0	0	0	0	0	3		2	2
16	2	2	3	1	4	3	4	3	4	4	3	3	3	3	3	3	3	3	4	2	0	0	0	0	0	0	0	0	0	0	0	0	2	5	3	2
24	4	4	4	4	4	4	4	4	4	4	4	4	4	4	4	4	4	4	4	0	0	0	0	0	0	0	0	0	0	0	0	0	3	2	1	2
32	0	2	2	0	3	3	2	2	2	1	1	1	1	1	2	2	2	1	3	1	0	0	1	0	0	0	0	0	0	0	0	0	4	2	2	2
19	4	4	4	4	4	4	4	4	4	4	4	4	4	4	2	4	4	4	4	0	0	1	0	0	0	0	0	0	0	0	0	0	3	2	2	3
27	2	2	3	1	2	1	1	1	1	1	1	2	2	2	1	2	1	2	1	0	0	0	2	0	0	0	0	0	0	0	0	0	3	2	1	2
31	2	2	2	2	2	2	1	1	1	2	2	2	2	2	2	1	2	1	2	1	0	0	3	0	0	0	0	0	0	0	0	0	3	2	2	2
40	1	2	2	1	4	0	2	2	0	1	1	2	2	1	2	2	1	2	4	0	0	0	0	0	0	0	0	0	0	0	0	0	2	1	1	1
35	4	4	4	4	4	4	4	4	4	4	4	4	4	4	4	4	4	4	4	0	0	0	0	0	0	0	0	0	0	0	0	0	3	2	2	3
28	4	0	4	3	4	4	4	4	4	3	3	3	3	3	4	3	4	3	4	0	0	0	0	0	0	0	0	0	0	0	0	0	3	4	3	4
28	3	1	2	2	3	1	2	2	2	2	1	2	2	2	1	2	2	2	2	1	0	0	0	0	0	0	0	0	0	0	0	0	3	2	2	2
31	3	4	4	3	4	4	2	4	4	4	1	4	4	2	4	1	4	4	4	3	3	2	3	0	0	0	0	0	0	0	0	0	2	2	1	2
23	4	4	4	4	4	4	4	4	4	4	4	4	4	4	4	4	4	4	4	1	0	0	0	0	0	0	0	0	0	0	0	0	3	2	2	2
20	4	4	4	4	4	4	3	4	4	4	4	4	4	3	4	4	4	4	4	0	0	0	0	0	0	0	0	0	0	0	0	0	3	1	1	2
26	2	2	2	2	4	2	2	2	2	2	2	2	2	2	2	2	3	2	4	0	0	0	0	0	0	0	0	0	0	0	0	0	3	1	2	2
20	3	2	4	3	4	1	2	1	4	2	3	3	1	4	3	2	1	3	2	1	0	0	0	0	0	0	0	0	0	0	0	0	3	2	2	2
23	3	4	4	4	4	4	4	4	4	3	3	4	3	4	4	4	4	4	4	0	0	0	0	0	0	0	0	0	0	0	0	0	3	2	2	2
23	4	2	2	4	4	4	4	4	4	4	4	4	4	4	4	4	4	4	4	0	0	0	0	0	0	0	0	0	0	0	0	0	3	1	2	2
28	2	2	3	1	3	1	2	3	3	2	3	1	2	1	1	1	2	2	2	0	0	1	1	0	0	0	0	0	0	0	0	0	3	1	2	2
20	4	4	4	4	4	4	4	4	4	4	1	4	4	4	4	4	4	2	4	0	1	1	0	0	0	0	0	0	0	0	0	0	3	2	2	2
26	4	4	4	4	4	4	4	4	4	4	4	4	4	4	4	4	4	4	4	1	0	0	0	0	0	0	1	0	0	0	0	0	3	1	1	3
14	4	3	4	4	3	4	3	3	4	3	4	2	3	4	3	3	4	3	4	2	3	0	1	0	1	0	0	0	0	0	0	0	2	4	2	3
31	4	4	4	4	4	4	4	4	4	4	4	4	4	4	4	4	4	4	4	2	0	0	0	0	0	0	0	0	0	0	0	0	3	1	1	2
19	3	4	3	4	3	2	2	3	2	1	3	2	3	4	3	3	2	2	2	0	1	0	0	0	0	0	0	0	0	0	0	0	3	1	1	2
26	2	4	4	0	4	2	4	4	4	4	4	2	3	4	4	4	4	4	4	0	0	0	0	0	0	0	0	0	0	0	0	0	3	1	2	3
22	4	4	3	4	4	4	4	3	4	4	3	3	4	4	2	2	4	3	4	0	2	2	0	0	0	0	0	0	0	0	0	0	3	5	2	2
25	4	4	4	3	4	3	2	3	4	3	4	3	2	3	3	3	3	2	4	0	0	0	0	0	0	0	0	0	0	0	0	0	3	2	1	2
28	4	4	4	3	4	4	3	4	4	3	3	4	4	3	4	3	3	4	4	2	2	2	1	0	0	0	0	0	0	0	0	0	3	2	2	3
28	2	2	3	1	3	3	2	3	2	2	1	3	2	1	2	2	3	2	3	0	0	0	0	0	0	0	0	0	0	0	0	0	3	1	2	3
25	4	4	4	3	4	4	4	4	4	4	3	4	4	3	4	4	4	4	4	2	0	0	0	0	0	0	0	0	0	0	0	0	3	6		3
33	4	4	4	4	4	4	4	4	4	4	3	4	3	4	4	4	4	3	4	0	0	0	0	0	0	0	0	0	0	0	0	0	2	2	2	2
29	3	3	1	1	4	2	2	3	4	3	2	1	3	3	2	1	2	2	4	0	0	0	0	0	0	0	0	0	0	0	0	0	3	3	2	4
18	4	3	4	4	4	4	4	4	4	4	4	3	4	4	4	3	4	3	4	0	0	0	0	0	0	0	0	0	0	0	0	0	3	2	3	4
33	4	4	4	3	4	4	2	2	2	3	2	3	2	2	3	3	4	4	4	0	0	0	0	0	0	0	0	0	0	0	0	0	2	3	2	4
21	3	3	2	4	4	3	2	3	4	4	0	2	1	2	1	1	1	2	4	1	0	1	0	0	0	0	0	0	0	0	0	0	3	1	1	2
27	2	3	3	1	4	2	2	2	4	2	1	2	2	2	2	2	3	2	4	1	1	1	0	0	0	0	0	0	0	0	0	0	2	2	2	2
35	4	4	4	4	4	4	4	4	4	4	4	4	4	4	4	4	4	4	4	1	0	0	0	0	0	0	0	0	0	0	0	0	3	4	3	4
27	4	4	4	2	4	3	2	2	4	3	4	4	2	4	4	4	3	4	4	0	0	1	0	0	0	0	0	0	0	0	0	0	3	4	2	2
19	4	4	4	4	4	4	4	4	4	4	4	4	4	4	4	4	4	4	4	0	0	0	0	0	0	0	0	0	0	0	0	0	3	6		2
30	4	3	4	4	4	4	4	4	4	4	3	4	4	3	3	4	4	4	4	1	0	0	1	1	1	2	0	0	0	0	0	0	3	1	2	2
20	3	2	2	3	2	1	2	2	2	2	3	1	2	2	2	2	3	3	4	2	0	0	0	0	0	0	0	0	0	0	0	0	3	1	1	2
25	2	3	3	4	4	4	3	4	4	4	4	3	3	3	4	3	4	3	4	0	0	0	0	0	0	0	0	0	0	0	0	0	4	4	2	3
29	0	2	0	1	2	1	1	1	1	1	1	1	1	1	1	1	2	1	2	0	0	0	0	0	0	0	0	0	0	0	0	0	3	5	2	3
28	3	3	4	4	4	4	4	4	3	3	2	3	3	3	4	3	3	3	4	0	0	2	2	0	0	0	0	0	0	0	0	0	3	1	2	4
17	4	4	4	4	4	2	4	4	3	4	4	4	2	4	1	4	4	4	4	1	1	0	0	0	0	0	0	0	0	0	0	0	3	1	2	3
35	4	3	3	1	4	1	3	3	0	3	4	3	2	3	3	3	2	3	1	0	0	0	0	0	0	0	0	0	0	0	0	0	3	1		2
23	4	4	4	1	4	3	4	4	4	3	4	4	3	3	4	4	3	4	4	0	0	0	0	0	0	0	0	0	0	0	0	0	2	4	1	2
35	2	4	4	1	4	4	4	4	4	4	4	4	4	4	4	4	4	4	4	2	0	2	0	0	0	0	0	0	0	0	0	0	4	3	3	4
25	4	4	4	2	4	3	3	2	4	4	4	3	2	4	2	4	2	2	4	0	0	0	0	0	0	0	0	0	0	0	0	0	3	2	2	2
19	4	4	2	4	4	2	4	2	4	4	4	2	4	4	4	4	4	1	4	2	0	0	0	0	0	0	0	0	0	0	0	0	3	1	2	2
19	4	3	4	4	2	2	2	3	1	1	2	2	1	2	1	2	2	3	2	1	2	3	3	2	3	3	3	1	1	0	0	0	3	2	3	2
16	2	2	4	4	4	4	4	4	4	4	4	3	3	4	4	4	3	4	4	0	0	0	0	0	0	0	0	0	0	0	0	0	2	2	3	2
27	4	2	2	2	4	4	2	3	4	3	0	4	4	4	2	2	4	3	4	0	0	0	0	0	0	0	0	0	0	0	0	0	3	2	2	2
25	2	2	3	2	4	3	4	3	4	2	1	2	2	1	1	1	2	1	1	0	0	0	0	0	0	0	0	0	0	0	0	0	3	1	2	4
24	0	0	1	4	4	4	4	0	4	0	2	1	2	0	0	1	0	0	4	0	0	0	0	0	0	0	0	0	0	0	0	0	3	6	2	3
30	2	2	2	2	1	2	2	1	0	0	1	2	2	2	1	2	2	1	1	1	1	1	1	0	0	0	0	0	0	0	0	0	3	1	2	2
29	2	1	2	0	1	2	1	2	1	1	2	1	1	2	1	1	2	2	1	1	0	3	1	0	0	0	0	0	0	0	0	0	3	1	2	2
19	4	3	4	4	4	4	4	4	4	4	4	4	3	4	4	4	4	4	4	0	0	2	1	0	0	0	0	0	0	0	0	0	3	2	2	2
23	0	3	2	1	2	1	2	2	2	1	1	1	1	2	1	2	2	2	2	2	1	0	0	0	0	0	0	0	0	0	0	0	3	6		4
22	1	2	2	2	4	4	2	2	2	2	2	2	2	2	2	3	2	2	3	0	0	0	0	0	0	0	0	0	0	0	0	0	3	1	3	3
24	2	2	3	3	2	2	2	2	2	2	2	4	2	2	2	2	2	2	2	3	2	2	2	1	0	1	1	0	0	0	1	0	2	1	1	1
20	0	1	4	0	2	2	3	3	3	2	4	4	2	4	3	3	2	3	2	3	2	1	0	0	0	0	0	0	0	0	0	0	3	1	2	2
24	4	3	4	4	4	4	3	3	4	4	3	3	3	3	3	3	4	3	4	0	0	0	0	0	0	0	0	0	0	0	0	0	4	2	2	3
17	4	1	4	1	4	4	1	4	4	4	4	4	0	4	4	4	1	4	4	0	0	1	0	0	0	0	0	0	0	0	0	0	3	2	1	2
33	4	3	2	4	4	2	2	4	4	2	4	3	2	2	1	2	2	1	4	0	0	0	0	0	0	0	0	0	0	0	0	0	4	2	2	3
18	2	3	2	3	4	2	3	2	3	3	2	2	3	4	2	2	4	3	3	2	1	1	0	0	0	0	0	0	0	0	0	0	2	1	1	2
20	2	4	4	4	4	2	3	2	4	2	3	3	2	3	2	2	2	2	3	0	0	0	0	0	0	0	0	0	0	0	0	0	3	2	3	2
25	0	3	2	1	3	2	3	2	2	2	4	2	2	4	2	2	2	2	4	0	0	0	0	0	0	0	0	0	0	0	0	0	3	2	2	4
20	2	2	2	3	3	2	3	1	3	2	3	1	1	2	1	1	2	2	3	2	0	0	0	0	0	0	0	0	0	0	0	0	3	1	2	3
27	0	0	2	2	3	2	2	2	2	2	2	3	2	2	2	2	2	2	2	0	0	0	0	0	0	0	0	0	0	0	0	0	3	4	2	2
21	0	4	4	2	4	4	4	4	4	4	3	4	4	3	4	4	4	4	4	0	0	0	0	0	0	0	0	0	0	0	0	0	3	1	2	2
19	4	4	4	4	4	4	4	3	4	4	3	4	4	4	4	4	4	4	4	1	0	0	0	0	0	0	0	0	0	0	0	0	3	1	2	4
31	4	4	4	4	4	4	4	2	4	2	2	2	2	3	1	2	3	3	3	0	0	0	0	0	0	0	0	0	0	0	0	0	4	5	2	4
22	1	2	4	2	4	2	1	0	3	2	2	2	3	4	0	1	4	0	4	0	0	1	0	0	0	0	0	0	0	0	0	0	3	2	2	2
33	4	4	4	4	4	4	4	4	4	3	4	3	2	4	2	4	3	2	3	0	0	0	0	0	0	0	0	0	0	0	0	0	3	1	2	4
20	4	1	3	3	4	3	3	2	4	4	4	1	3	4	1	2	4	3	4	0	0	0	0	0	0	0	0	0	0	0	0	0	3	5	3	4
32	1	2	2	1	3	2	3	1	2	3	1	4	0	4	3	3	2	1	3	0	0	0	0	0	0	0	0	0	0	0	0	0	3	1	3	2
20	2	2	2	2	2	3	3	3	4	4	2	2	2	4	1	2	4	4	4	0	0	0	0	0	0	0	0	0	0	0	0	0	3	4	2	2
28	1	1	2	1	2	2	1	1	3	2	2	2	1	1	1	1	3	2	2	0	0	0	0	0	0	0	0	0	0	0	0	0	3	1	2	2
30	3	2	4	0	4	2	1	4	2	4	2	3	2	4	4	4	4	4	4	2	0	1	0	0	0	0	0	0	0	0	0	0	2	1	1	2
27	0	0	0	2	0	2	0	2	0	2	0	4	2	2	0	0	0	0	4	2	0	0	0	0	0	0	0	0	0	0	0	0	3	1	2	3
22	4	4	4	4	4	3	4	4	4	4	4	4	3	4	4	3	3	4	4	0	0	0	0	0	0	0	0	0	0	0	0	0	3	2	2	2
19	2	3	4	4	4	3	4	4	4	4	4	4	3	3	4	4	3	4	4	3	2	1	1	0	0	0	0	0	0	0	0	0	3	1	3	2
16	1	1	2	2	0	1	2	0	1	2	1	1	1	1	1	1	1	1	1	0	0	0	0	0	0	0	0	0	0	0	0	0	3	1	1	2
31	2	2	3	2	2	1	2	3	2	2	2	2	0	1	2	1	1	1	2	2	1	1	1	0	1	0	0	0	0	0	0	0	3	2	1	2
25	3	3	3	0	4	2	1	2	4	2	3	2	2	3	2	2	2	1	4	1	1	0	0	0	0	0	0	0	0	0	0	0	3	4	2	3
27	1	4	4	1	3	3	2	4	3	2	4	1	3	2	4	2	3	4	3	1	0	0	0	0	0	0	0	0	0	0	0	0	3	6	2	2
34	1	1	3	2	3	1	2	3	4	2	2	3	4	1	1	1	2	1	3	0	0	0	0	0	0	0	0	0	0	0	0	0	3	4	2	3
31	2	2	1	2	4	4	1	4	4	3	2	2	2	3	4	3	4	4	4	2	0	0	2	0	0	0	0	0	0	0	0	0	3	4	2	2
21	1	0	2	1	4	3	3	2	3	2	2	2	2	2	2	2	2	2	3	1	0	0	0	0	0	0	0	0	0	0	0	0	3	2	2	2
21	0	4	4	4	4	4	2	2	4	0	0	2	1	0	0	0	2	1	4	0	0	0	0	0	0	0	0	0	0	0	0	0	3	5	2	3
23	4	4	4	2	4	3	2	4	4	2	4	4	4	4	4	4	4	4	4	0	1	1	0	0	1	1	0	0	0	0	0	0	3	2		4
18	2	3	3	1	4	4	2	3	3	2	1	4	2	1	3	2	2	2	4	1	0	0	0	0	0	0	0	0	0	0	0	0	3	1	2	2
34	2	2	3	1	3	3	2	3	3	3	2	3	3	1	1	1	2	2	4	0	0	1	0	0	0	0	0	0	0	0	0	0	4	4	3	3
19	0	0	0	4	4	4	4	0	4	4	4	4	4	0	4	4	4	4	4	0	0	0	0	0	0	0	0	0	0	0	0	0	3	1	1	1
28	1	2	3	2	4	1	4	3	4	4	1	4	0	4	3	2	0	2	4	0	0	0	0	0	0	0	0	0	0	0	0	0	3	1	2	2
23	4	2	4	4	4	3	4	3	3	3	4	4	4	4	3	3	2	2	3	2	0	0	1	0	0	0	0	0	0	0	0	0	3	1	2	3
30	4	3	4	4	3	3	3	3	4	3	3	3	3	4	4	3	3	3	3	1	0	0	0	0	0	0	0	0	0	0	0	0	3	1	2	2
28	3	2	3	4	4	1	2	3	3	1	4	3	1	4	3	2	1	4	3	2	1	0	0	0	0	0	0	0	0	0	0	0	4	4	3	4
24	0	1	2	1	3	3	1	3	2	2	1	2	3	1	2	1	2	2	3	1	0	1	0	1	0	0	0	0	0	0	0	0	3	2	1	3
17	4	4	3	4	4	4	3	3	3	3	3	3	4	4	4	3	3	3	4	1	0	0	0	0	0	0	0	0	0	0	0	0	3	5	3	4
25	4	4	4	2	4	4	4	4	4	4	3	4	4	4	4	4	4	4	4	2	0	0	2	1	0	0	0	0	0	0	0	0	4	2	2	4
19	4	3	4	3	4	4	2	2	4	4	4	3	2	4	3	3	3	2	4	1	1	0	0	0	0	0	0	0	0	0	0	0	2	1	2	1
29	3	2	3	2	3	2	2	2	3	2	3	3	3	3	3	3	2	3	4	0	0	1	0	0	0	0	0	0	0	0	0	0	3	2	2	4
38	4	3	4	4	4	4	3	3	4	2	4	4	3	4	4	3	4	3	4	1	0	0	0	0	0	0	0	0	0	0	0	0	4	5	3	4
25	1	1	2	1	4	4	3	1	2	3	3	4	3	1	2	3	4	2	4	0	0	0	0	0	0	0	0	0	0	0	0	0	3	1	1	2
25	2	2	1	0	4	1	2	2	2	1	0	3	1	4	2	2	2	2	4	0	0	0	0	0	0	0	0	0	0	0	0	0	2	1	1	1
30	2	2	1	4	3	3	4	2	3	2	3	3	4	2	2	3	4	3	3	1	0	2	2	1	2	0	0	0	0	0	0	0	2	1	1	2
19	2	1	1	0	2	2	4	2	4	1	0	2	2	2	1	1	1	2	2	3	3	2	2	1	0	0	0	0	0	0	0	0	3	1	1	2
24	4	4	4	3	3	3	3	4	3	3	4	3	3	3	4	4	3	3	4	2	0	0	0	0	0	0	0	0	0	0	0	0	4	5	3	4
24	0	2	2	0	2	2	2	0	0	2	0	2	0	0	2	2	0	2	2	2	0	0	0	0	0	0	0	0	0	0	0	0	3	1	2	3
26	4	3	4	3	4	4	3	4	4	3	4	4	3	4	4	4	4	4	4	0	0	0	0	0	0	0	0	0	0	0	0	0	3	2	1	2
27	4	4	4	0	4	2	3	4	4	1	3	4	2	3	4	4	3	3	4	0	0	0	0	0	0	0	0	0	0	0	0	0	4	2	2	3
19	2	3	3	2	2	2	1	2	2	2	1	2	1	2	3	2	3	2	2	1	0	0	0	0	0	0	0	0	0	0	0	0	3	1	2	2
29	2	3	4	4	4	3	4	3	3	3	1	3	4	3	3	3	3	2	3	0	0	0	0	0	0	0	0	0	0	0	0	0	4	5	2	3
21	4	3	4	3	4	4	3	3	4	3	3	3	3	4	3	3	3	3	3	2	1	1	0	1	1	0	1	0	0	1	1	1	3	4	2	2
30	4	4	4	4	4	3	4	4	4	3	4	4	4	4	4	4	4	4	4	0	0	2	0	0	0	0	0	0	0	0	0	0	4	3	2	4
26	2	4	4	4	4	4	4	4	4	4	4	4	4	4	4	4	4	4	4	1	1	1	0	0	0	0	0	0	0	0	0	0	3	1	2	2
31	4	4	4	4	4	4	4	4	4	4	4	4	4	4	4	4	4	4	4	0	0	0	0	0	0	0	0	0	0	0	0	0	3			4
29	4	4	3	4	4	4	3	4	4	4	4	4	4	4	3	4	4	4	4	0	0	0	0	0	0	0	0	0	0	0	0	0	3		3	4
25	2	4	4	1	4	2	3	4	4	4	4	4	3	4	4	4	4	4	4	1	0	0	0	0	0	0	0	0	0	0	0	0	3	2	2	2
32	4	4	4	4	4	4	4	4	4	4	4	4	4	4	4	4	4	4	4	0	0	0	0	0	0	0	0	0	0	0	0	0	3	2	2	4
31	2	4	4	4	4	4	4	4	4	4	4	4	4	4	4	4	4	4	4	0	0	0	0	0	0	0	0	0	0	0	0	0	3	2	2	3
28	1	2	3	0	3	3	3	3	2	2	3	2	3	3	2	2	2	2	4	2	0	0	1	0	1	0	0	0	1	1	1	1	3	5	3	4
27	2	4	4	2	4	4	4	4	2	2	0	2	4	2	2	2	2	4	4	0	0	0	0	0	0	0	0	0	0	0	0	0	3	2	2	3
20	4	4	4	4	4	4	3	4	4	4	3	4	4	3	4	3	4	4	4	0	0	0	0	0	0	0	0	0	0	0	0	0	3	5	3	3
29	3	3	3	4	3	2	3	3	3	3	1	2	1	1	2	2	1	1	2	0	0	0	0	0	0	0	0	0	0	0	0	0	2	1	3	2
24	3	3	3	3	3	3	3	3	3	3	3	3	2	3	2	2	2	2	3	1	2	1	2	0	0	0	0	0	0	0	0	0	3		2	2
22	0	1	2	2	2	3	3	4	1	1	3	3	2	1	1	3	1	3	4	1	2	3	2	2	1	2	2	3	2	1	1	1	3	1	2	2
24	0	2	1	0	3	2	1	1	1	1	0	1	0	0	0	1	1	1	1	1	0	1	0	1	1	1	0	0	0	0	0	0	3	1	2	2
22	4	4	4	4	4	4	4	4	4	4	4	4	4	4	4	4	4	4	4	0	0	0	0	0	0	0	0	0	0	0	0	0	3	1	1	2
32	4	4	3	4	3	1	2	3	1	1	3	3	2	4	2	2	3	2	2	1	0	0	0	0	0	0	0	0	0	0	0	0	3	1	2	3
25	4	2	2	2	4	3	3	2	2	2	4	3	2	0	1	2	2	2	3	2	0	0	0	0	0	0	0	0	0	0	0	0	3	2	2	3
19	3	3	4	1	3	2	2	2	4	2	2	2	3	2	3	1	2	2	2	2	2	1	1	0	0	0	0	0	0	0	0	0	3	2	2	3
42	2	3	4	3	4	4	4	4	4	4	2	4	3	2	4	4	2	4	4	0	0	0	0	0	0	0	0	0	0	0	0	0	4	1	2	4
26	3	2	4	3	4	3	4	4	3	3	4	4	3	4	2	4	3	2	4	0	0	0	0	0	0	0	0	0	0	0	0	0	3	4	2	2
23	2	1	3	1	2	3	3	1	3	2	1	1	3	1	2	1	3	1	2	2	1	2	1	0	0	1	0	0	1	0	0	0	3	1	1	2
21	2	2	2	4	3	3	2	3	3	3	3	3	3	3	3	3	3	3	3	3	0	0	2	0	0	0	0	0	0	0	0	0	4	2	2	2
35	2	2	2	2	1	3	4	3	4	4	4	4	2	4	2	4	4	4	4	0	0	0	0	0	0	0	0	0	0	0	0	0	3	2	2	4
27	4	4	4	4	4	4	4	4	4	4	3	4	4	4	4	4	4	4	4	0	0	0	0	0	0	0	0	0	0	0	0	0	3	1	2	2
19	1	2	1	4	2	0	1	1	1	1	0	2	2	3	2	2	1	1	3	0	0	1	0	0	0	0	0	0	0	0	0	0	3	1	2	3
36	2	3	2	1	2	2	2	1	2	1	3	2	2	3	2	2	2	1	3	0	0	0	0	0	0	0	0	0	0	0	0	0	3	4	2	3
34	4	2	2	4	4	2	2	2	2	2	4	2	2	4	2	2	2	2	2	0	0	0	0	0	0	0	0	0	0	0	0	0	3	1	1	2
33	1	3	3	1	3	1	2	3	3	1	1	2	1	1	2	2	1	2	2	0	0	0	0	0	0	0	0	0	0	0	0	0	3	2	2	3
23	4	3	3	4	4	3	3	3	4	3	4	4	3	4	2	2	4	2	4	3	0	3	0	0	0	0	0	0	0	0	0	0	4	5	3	2
22	0	3	4	3	4	4	3	3	3	3	3	3	3	3	3	2	3	3	4	0	0	0	0	0	0	0	0	0	0	0	0	0	3	1	2	2
31	4	4	3	3	3	3	3	3	2	4	2	2	2	2	2	2	2	2	3	1	0	0	0	0	0	0	0	0	0	0	0	0	3	4	2	2
27	4	2	3	3	2	2	2	2	1	2	4	2	2	4	2	2	2	1	1	1	0	1	1	1	1	1	1	0	0	0	0	0	4	4	3	3
24	2	3	4	1	2	1	1	4	2	1	2	2	2	2	3	3	2	2	1	2	1	1	2	0	0	0	0	0	0	0	0	0	3	2	2	3
27	4	3	4	2	3	2	2	2	3	2	3	3	2	2	2	2	2	2	3	1	0	0	0	0	0	0	0	0	0	0	0	0	4	2	2	2
29	4	3	3	4	3	3	3	3	3	3	4	3	3	4	4	3	3	4	4	0	0	0	0	0	0	0	0	0	0	0	0	0	3	4	2	3
39	4	4	4	4	4	4	4	4	4	4	4	4	4	4	3	4	4	4	4	0	0	0	0	0	0	0	0	0	0	0	0	0	3	4	2	2
29	4	4	4	4	4	3	4	3	4	4	2	3	2	2	3	3	1	4	3	1	0	0	0	0	0	0	0	0	0	0	0	0	3	2	1	2
31	3	2	2	0	2	0	1	3	2	2	0	0	1	1	0	1	2	1	1	2	1	0	1	0	1	0	0	0	0	0	0	0	3	1	1	2
29	3	3	3	2	4	4	4	4	4	4	3	3	4	3	3	2	3	3	4	1	1	0	0	0	0	0	0	0	0	0	0	0	3	1	1	3
26	2	3	4	3	2	3	2	2	3	4	2	3	2	1	1	2	2	2	3	0	0	0	0	0	0	0	0	0	0	0	0	0	3	2	2	2
26	4	3	4	2	4	2	4	4	4	2	1	4	2	1	4	4	2	4	4	3	0	0	2	0	0	0	0	0	0	0	0	0	4	2	2	2
26	0	0	1	0	4	3	1	2	4	2	0	1	2	2	2	1	4	4	4	1	0	0	0	0	0	0	0	0	0	0	0	0	4	1	2	2
23	2	1	1	2	3	3	2	2	3	2	1	1	2	2	3	2	3	2	2	1	1	1	0	0	1	0	0	0	0	0	0	0	3	2	2	2
18	3	3	4	4	4	4	4	3	4	4	4	4	3	3	3	2	3	3	4	0	0	0	0	0	0	0	0	0	0	0	0	0	3	2	2	2
25	2	2	2	3	3	4	2	2	2	2	1	2	2	3	1	1	3	2	3	0	0	0	0	0	0	0	0	0	0	0	0	0	3	2	2	2
21	2	4	3	1	4	4	4	3	4	4	2	4	2	3	3	4	4	3	4	0	0	0	0	0	0	0	0	0	0	0	0	0	3	2	3	4
27	4	4	4	4	4	4	4	4	4	4	4	4	4	4	4	4	4	4	4	0	0	0	0	0	0	0	0	0	0	0	0	0	3		3	4
29	3	3	2	1	3	2	2	1	2	2	3	1	1	3	1	1	3	2	3	0	0	0	0	0	0	0	0	0	0	0	0	0	3	1	2	2
28	4	4	4	4	4	2	4	4	4	2	4	4	4	4	4	4	4	4	4	0	0	0	0	0	0	0	0	0	0	0	0	0	3	5	2	2
24	4	4	4	4	4	4	4	4	4	4	4	4	4	4	4	4	4	4	4	0	0	0	0	0	0	0	0	0	0	0	0	0	3	3	3	4
17	4	4	4	4	4	4	4	4	4	4	4	4	4	4	4	4	4	4	4	0	0	0	0	0	0	0	0	0	0	0	0	0	3	4	2	2
27	2	2	4	1	4	2	1	2	4	4	1	2	1	1	0	2	3	2	4	1	0	0	0	0	1	0	0	0	0	0	0	0	3	1	1	2
27	4	3	4	2	1	3	3	2	2	1	2	1	2	2	2	2	2	2	2	2	1	0	1	1	0	0	0	0	0	0	0	0	3	1	1	2
30	4	3	3	2	3	3	3	3	3	2	4	3	3	4	3	2	3	2	3	2	0	0	0	0	0	0	0	0	0	0	1	0	3	2	2	3
24	4	4	4	4	4	4	4	4	4	4	4	4	4	4	4	4	4	3	4	0	0	0	0	0	0	0	0	0	0	0	0	0	3	6	2	2
21	4	4	3	3	4	4	4	3	4	4	3	4	4	4	4	3	4	4	4	0	0	0	0	0	0	0	0	0	0	0	0	0	3	4	1	2
41	1	2	2	1	3	2	2	2	2	4	2	1	2	1	4	2	1	2	2	0	0	0	0	0	0	0	0	0	0	0	0	0	3	2	2	2
24	1	2	2	1	4	4	2	2	2	1	3	1	1	2	0	1	2	1	4	0	0	0	0	0	0	0	0	0	0	0	0	0	3	2	2	4
25	4	1	3	2	3	2	2	1	1	1	4	2	1	4	0	1	1	2	2	0	1	2	3	1	1	1	1	0	0	0	0	0	3	1	2	2
26	3	3	3	2	3	2	2	4	2	2	3	2	2	4	4	3	2	2	3	0	0	0	0	0	0	0	0	0	0	0	0	0	3	4	2	2
31	4	4	4	4	4	4	4	4	4	4	4	4	4	4	4	4	4	4	4	0	0	0	0	0	0	0	0	0	0	0	0	0	1	4	2	2
20	4	4	4	4	4	4	4	4	4	4	4	4	4	4	4	4	4	4	4	0	0	0	0	0	0	0	0	0	0	0	0	0	2	5	2	2
15	4	4	4	2	4	4	2	4	4	4	2	4	4	2	2	2	2	4	4	0	1	1	0	0	0	0	0	0	0	0	0	0	2	4	2	4
28	4	2	3	4	4	3	3	4	4	3	4	2	2	4	4	3	4	3	4	0	0	0	0	0	0	0	0	0	0	0	0	0	3	1	2	2
22	4	3	4	3	4	4	3	4	4	4	4	4	3	4	4	4	4	4	4	0	0	0	0	0	0	0	0	0	0	0	0	0	3	3	2	2
32	1	3	3	3	3	2	3	3	3	2	2	3	2	2	3	3	3	3	4	3	3	0	0	1	2	0	0	0	0	1	0	0	2	2	2	2
25	3	4	4	4	2	4	2	4	4	4	4	4	2	2	2	2	4	2	4	0	0	0	0	0	0	0	0	0	0	0	0	0	3	2	2	3
35	2	1	1	2	3	3	2	2	3	3	2	2	1	2	1	1	2	2	3	0	0	0	0	0	0	0	0	0	0	0	0	0	3	2	2	2
24	4	4	4	4	4	4	4	1	4	0	4	1	0	4	4	1	4	2	4	0	0	0	0	0	0	0	0	0	0	0	0	0	3	1	2	4
23	2	2	2	1	2	2	2	2	3	3	3	3	3	3	3	3	2	3	3	2	1	0	0	0	0	0	0	0	0	0	0	0	2	2	1	3
26	4	2	3	4	4	3	3	3	4	3	4	3	3	4	3	3	0	3	4	0	0	0	0	0	0	0	0	0	0	0	0	0	4	2	2	4
22	3	1	1	1	1	0	1	2	0	0	0	1	0	0	0	1	1	1	1	3	0	2	0	0	0	0	0	0	0	0	0	0	3	2	2	4
16	3	4	4	2	4	1	3	4	2	2	4	4	2	2	2	3	2	3	4	3	2	0	0	0	0	0	0	0	0	0	0	0	3	1	2	4
24	2	2	0	0	3	3	1	1	3	3	3	2	1	1	0	2	3	0	4	0	1	1	0	0	0	0	0	0	0	0	0	0	3	1	2	2
32	4	4	4	3	4	3	4	4	4	4	4	4	4	4	3	3	4	4	4	3	0	0	0	0	0	0	0	0	0	0	0	0	2	1	1	2
26	1	4	4	2	1	2	2	2	1	2	2	2	4	1	0	2	4	4	4	0	0	0	0	0	0	0	0	0	0	0	0	0	3	4	2	3
24	4	4	4	4	4	3	3	4	4	4	4	4	3	3	4	4	4	4	4	0	0	0	0	0	0	0	0	0	0	0	0	0	3	1	2	2
22	4	1	2	4	4	4	2	3	4	4	4	4	4	4	4	3	4	4	4	0	0	0	0	0	0	0	0	0	0	0	0	0	3	2	2	2
28	4	4	4	3	4	3	3	4	4	4	4	4	3	4	4	4	3	3	4	2	1	2	0	0	1	0	0	0	0	1	0	0	4	4	3	4
23	4	3	4	2	4	4	3	3	3	4	4	3	3	4	3	3	4	3	4	0	0	0	0	0	0	0	0	0	0	0	0	0	3	2	3	3
39	3	3	1	2	4	4	4	2	3	1	2	2	2	2	3	3	3	3	3	0	0	0	0	0	0	0	0	0	0	0	0	0	3	1	2	2
22	4	4	4	2	4	2	4	4	4	1	4	4	3	2	2	2	3	4	4	0	0	0	0	0	0	0	0	0	0	0	0	0	3	2		2
26	4	4	3	2	4	4	2	4	4	4	3	3	3	4	3	3	3	3	4	1	0	1	0	0	0	0	0	0	0	0	0	0	3	2	2	2
23	4	4	4	4	4	4	4	4	4	4	4	4	4	4	4	4	4	4	4	0	0	0	0	0	0	0	0	0	0	0	0	0	3	2	1	2
26	4	2	4	2	2	2	2	2	3	3	4	3	4	4	3	3	3	4	4	0	0	0	0	0	0	0	0	0	0	0	0	0	3	2	3	2
27	4	3	3	3	4	3	3	4	4	4	4	3	3	4	3	3	3	3	4	2	1	2	0	0	0	0	0	0	0	0	0	0	4	2	2	3
28	4	3	4	4	4	4	4	4	4	4	4	4	4	4	4	4	4	4	4	3	3	3	3	3	3	3	1	0	0	0	0	0	2	2	1	1
20	4	4	4	4	4	3	3	4	4	4	4	4	3	4	4	4	3	4	4	0	0	1	0	0	0	0	0	0	0	0	0	0	3	1	2	2
40	4	4	4	4	4	3	4	4	4	4	4	4	4	4	4	2	4	4	4	0	0	0	0	0	0	0	0	0	0	0	0	0	3	1	1	2
30	2	2	1	2	2	2	2	2	2	2	1	2	2	1	2	2	2	2	3	1	0	0	0	0	0	0	0	0	0	0	0	0	3	2	2	2
23	2	2	3	2	3	4	2	4	2	3	3	3	2	3	1	2	3	2	3	0	0	0	0	0	0	0	0	0	0	0	0	0	3	2	2	2
21	4	4	4	4	4	3	3	4	3	3	4	4	3	4	4	4	2	2	4	1	0	0	0	0	0	0	0	0	0	0	0	0	3	6	2	3
29	4	3	4	4	3	2	4	3	3	3	3	3	3	3	4	3	4	3	4	0	0	0	0	0	0	0	0	0	0	0	0	0	3	2	2	2
24	4	4	4	4	4	4	4	4	4	4	4	4	4	4	4	4	4	4	4	0	0	0	0	0	0	0	0	0	0	0	0	0	3	6	2	2
27	1	2	2	2	2	2	3	3	3	3	3	3	2	3	3	3	3	3	1	0	0	0	0	0	0	0	0	0	0	0	0	0	4		3	4
18	3	3	3	4	4	4	4	3	2	2	3	3	4	4	4	4	3	4	3	1	0	0	0	0	0	0	0	0	0	0	0	0	3	1	2	2
26	1	1	4	2	2	4	2	1	4	2	2	2	4	4	4	2	4	3	4	2	2	1	0	2	2	0	0	2	0	0	0	0	3	2	2	4
23	0	0	2	4	4	0	4	4	4	0	4	4	4	4	4	4	4	4	4	2	0	0	0	0	1	0	0	0	0	0	0	0	3	1	3	1
22	3	3	3	3	3	3	2	3	2	2	2	2	3	3	3	3	3	3	3	0	0	0	0	0	2	0	0	0	0	0	0	0	4	5	2	4
34	4	4	4	4	4	4	4	4	4	4	4	4	4	4	4	4	4	4	4	2	0	0	0	0	0	0	0	0	0	0	0	0	3	2	2	3
33	3	4	4	3	4	4	4	3	4	3	4	4	4	4	4	4	4	3	4	3	2	0	0	0	0	0	0	0	0	0	0	0	3	2	1	2
20	4	4	2	4	4	4	2	3	4	3	4	2	4	4	4	4	3	2	4	0	0	1	0	0	0	0	0	0	0	0	0	0	3	3	2	2
32	1	3	4	3	3	4	2	3	2	2	2	4	2	4	1	2	2	2	3	0	1	0	0	2	0	0	0	0	0	0	0	0	3		2	3
40	4	4	4	4	4	4	4	4	4	4	4	4	3	4	4	4	4	4	4	0	0	0	0	0	0	0	0	0	0	0	0	0	3	6	3	4
20	4	4	4	4	4	4	3	4	4	4	4	4	4	4	3	3	4	3	4	0	0	0	0	0	0	0	0	0	0	0	0	0	3	2	2	2
25	1	2	2	2	2	3	3	3	3	3	2	3	2	3	3	3	3	3	3	2	2	2	1	0	0	0	0	0	0	0	0	0	3	5	3	4
21	2	2	2	1	3	3	2	2	2	3	2	2	3	2	2	2	3	3	3	2	0	0	0	0	0	0	0	0	0	0	0	0	3	4	2	2
32	4	3	3	3	3	3	3	3	3	3	3	3	3	3	3	3	3	3	3	0	0	0	0	0	0	0	0	0	0	0	0	0	3	2	2	4
22	4	4	4	4	4	4	4	4	4	4	4	4	4	4	4	4	4	4	4	3	3	0	0	0	0	0	0	0	0	0	0	0	3	1	1	2
22	4	3	3	3	3	3	3	3	3	3	3	1	3	4	3	1	3	2	4	0	0	0	0	0	0	0	0	0	0	0	0	0	3	1	2	3
41	4	4	3	4	3	4	3	4	4	3	3	3	3	3	4	4	3	3	3	3	1	0	0	0	0	0	0	0	0	0	0	0	3	1	2	2
34	1	2	1	0	1	4	4	2	4	4	4	2	4	1	4	2	2	1	4	0	0	1	0	0	0	0	0	0	0	0	0	0	3		2	4
22	4	3	4	2	4	4	3	2	4	3	4	4	2	4	3	4	3	4	3	0	0	0	0	0	0	0	0	0	0	0	0	0	3	2	2	2
15	1	3	2	2	4	4	4	4	1	2	2	2	2	2	0	3	3	2	2	0	0	0	0	0	0	0	0	0	0	0	0	0	2	4	2	2
32	2	2	2	1	3	2	2	2	1	1	2	2	2	1	1	1	2	2	2	0	0	1	0	0	0	0	0	0	0	0	0	0	3	1	2	2
18	3	3	3	2	4	3	3	2	3	3	4	3	3	4	3	2	3	3	4	0	0	0	0	0	0	0	0	0	0	0	0	0	3	2	2	2
20	3	4	3	4	4	4	4	3	4	3	4	4	4	4	4	4	4	4	4	0	0	0	0	0	0	0	0	0	0	0	0	0	3	4	2	2
29	1	2	3	1	2	2	3	3	2	2	1	2	3	1	2	3	2	3	4	0	0	0	0	0	0	0	0	0	0	0	0	0	3	2	3	2
23	1	1	2	1	2	1	2	1	1	1	1	3	3	3	3	3	3	3	4	2	1	0	2	0	0	0	0	0	0	0	0	0	3		2	2
24	4	4	3	4	4	4	3	3	4	4	4	4	4	4	4	4	4	3	4	1	0	0	0	0	0	0	0	0	0	0	0	0	3	2	2	4
28	1	4	3	4	4	1	4	3	4	3	2	2	1	4	4	1	4	3	4	1	0	0	0	0	0	0	0	0	0	0	0	0	3	2	2	2
31	4	4	4	4	4	4	3	4	4	4	4	4	4	4	4	4	4	4	4	0	0	0	0	0	0	0	0	0	0	0	0	0	3	2	2	2
25	4	4	4	4	4	4	4	4	4	4	4	4	4	4	4	4	4	4	4	1	0	1	0	0	0	0	0	0	0	0	0	0	3	1	2	2
31	4	4	4	3	4	4	4	4	4	4	4	4	4	4	4	4	4	4	4	0	0	0	0	0	0	0	0	0	0	0	0	0	3	2	2	2
25	2	3	3	3	2	1	2	2	3	3	3	3	2	3	2	3	2	1	3	0	0	0	0	0	0	0	0	0	0	0	0	0	3	2	2	3
26	4	4	4	3	4	3	4	4	4	4	4	4	4	4	4	4	4	4	4	0	1	0	0	0	0	0	0	0	0	0	0	0	3	2	2	3
34	4	2	3	4	4	4	2	2	4	4	4	4	3	3	4	4	4	3	4	0	0	0	0	0	0	0	0	0	0	0	0	0	3		2	4
21	4	4	4	4	4	4	4	4	4	3	4	4	3	4	2	3	3	3	4	1	1	1	0	0	0	0	0	0	0	0	0	0	3	2	3	4
34	0	0	0	0	4	2	2	2	4	2	2	2	2	2	0	2	3	2	4	0	0	0	0	0	0	0	0	0	0	0	0	0	3	4	2	3
21	1	3	3	2	3	3	3	2	2	1	0	2	2	2	1	1	2	3	4	2	0	2	0	0	0	0	0	0	0	0	0	0	3	2	2	2
24	4	4	4	4	4	4	4	4	4	1	4	4	4	4	4	4	4	4	4	0	0	0	0	0	0	0	0	0	0	0	0	0	3	2	2	2
24	4	4	4	1	4	4	3	4	4	4	4	4	4	3	3	3	4	3	4	0	0	0	0	0	0	0	0	0	1	0	0	0	1	2	1	3
24	2	3	3	1	4	2	3	3	3	2	1	2	2	2	2	3	2	3	4	0	1	1	0	0	0	0	0	0	0	0	0	0	4	1	2	3
31	1	1	3	1	4	4	2	2	4	3	1	3	2	2	1	1	3	3	4	0	0	0	0	0	0	0	0	0	0	0	0	0	3	4	2	2
37	4	4	3	4	4	4	4	3	4	3	4	3	2	4	0	2	2	2	4	0	0	0	0	0	0	0	0	0	0	0	0	0	3	2	2	3
29	2	2	2	3	4	4	4	3	2	2	1	2	2	1	4	4	4	3	4	0	0	0	1	0	0	0	0	0	0	0	0	0	2	2	2	2
20	3	3	3	1	3	3	3	3	3	4	4	4	3	3	3	3	3	3	4	2	2	0	0	0	0	0	0	0	0	0	0	0	3	2	2	3
28	3	4	4	4	4	3	3	3	3	3	0	3	3	2	3	3	2	2	3	0	0	0	0	0	0	0	0	0	0	0	0	0	3	2	1	2
24	2	2	3	1	4	3	3	2	2	2	2	4	3	2	1	2	3	3	2	2	1	0	0	0	0	0	0	0	0	0	0	0	3	1	1	2
29	1	2	2	1	4	4	4	4	4	4	4	4	4	4	4	4	4	2	4	0	0	0	0	0	0	0	0	0	0	0	0	0	3	1	1	2
25	2	2	2	2	2	2	2	2	2	2	2	2	3	2	2	2	3	3	3	0	0	0	0	0	0	0	0	0	0	0	0	0	4	2	1	2
30	3	3	4	4	4	4	4	4	4	4	4	4	4	3	3	3	4	3	4	0	0	0	0	0	0	0	0	0	0	0	0	0	3	2	1	3
24	4	2	3	3	4	3	2	3	4	4	4	3	2	4	3	2	4	2	4	1	0	0	0	0	0	0	0	0	0	0	0	0	3	2	2	2
18	4	4	4	2	4	4	4	2	4	4	4	4	4	4	4	4	4	4	4	0	0	0	0	0	0	0	0	0	0	0	0	0	3	2	3	2
22	3	4	4	3	4	3	3	3	3	3	1	1	2	0	2	1	1	0	1	3	2	2	0	0	0	0	0	0	0	1	1	1	2	2	1	2
33	2	2	1	1	4	4	2	2	4	4	1	1	3	1	1	1	4	3	4	1	0	0	0	0	0	0	0	0	0	0	0	0	3	2	2	2
30	0	1	2	2	2	1	2	2	1	1	1	1	1	1	1	0	1	0	1	0	0	0	0	0	0	0	0	0	0	0	0	0	3	2	2	3
24	4	4	4	2	4	4	2	4	4	2	4	4	4	4	2	3	0	3	4	1	0	1	0	0	0	0	0	0	0	0	0	0	3	1	2	4
21	4	4	3	4	4	4	3	3	4	3	4	3	4	4	3	3	3	3	4	1	0	0	0	0	0	0	0	0	0	0	0	0	3	4	2	2
25	4	4	4	4	4	4	4	4	4	4	4	3	2	4	4	4	4	4	4	2	0	0	0	0	0	0	0	0	0	0	0	0	3	1	2	2
21	4	2	4	4	4	2	3	4	4	2	2	4	2	3	3	2	3	2	4	0	2	0	0	0	0	0	1	0	0	0	0	0	2	2	2	2
23	4	4	4	4	4	4	4	4	4	4	4	4	4	4	4	4	4	4	4	0	0	0	0	0	0	0	0	0	0	0	0	0	4	5	3	4
23	2	4	2	0	2	4	0	1	4	0	0	2	0	4	4	0	4	4	4	0	0	0	0	0	0	0	0	0	0	0	0	0	3	1	2	2
36	2	2	3	3	3	3	2	3	3	3	3	3	2	3	3	3	3	3	2	0	0	2	0	0	0	0	0	0	0	0	0	0	2	1	2	2
24	4	4	4	4	4	4	4	4	4	4	4	4	4	4	4	4	4	4	4	0	0	0	0	0	0	0	0	0	0	0	0	0	3	2	2	3
29	3	2	3	2	4	2	3	3	2	2	3	3	2	3	3	2	2	2	3	3	2	3	2	0	0	0	0	0	0	0	0	0	3	2	2	3
21	0	2	2	0	4	4	2	2	4	4	1	4	2	3	4	2	4	3	4	0	0	0	0	0	0	0	0	0	0	0	0	0	3	2	2	2
31	4	3	3	4	4	3	3	4	4	3	4	3	3	4	3	2	3	2	4	0	0	0	0	0	0	0	0	0	0	0	0	0	4	2	1	2
23	2	2	4	4	4	2	3	3	2	1	4	2	1	4	3	3	2	3	2	1	0	2	0	0	0	0	0	0	0	0	0	0	3	2	3	3
32	2	4	4	2	4	3	2	3	4	4	1	4	3	4	4	4	4	3	4	1	1	2	0	0	0	0	0	0	0	0	0	0	2	2	2	2
18	4	4	4	4	4	4	4	3	4	4	4	4	4	4	4	4	4	3	4	0	0	0	0	0	0	0	0	0	0	0	0	0	3	4	2	2
26	4	4	4	2	4	4	4	4	1	4	4	1	4	1	4	4	4	4	4	0	0	0	0	0	0	0	0	0	0	0	0	0	4	5	3	4
26	1	3	2	2	4	4	4	4	4	3	3	2	4	3	4	3	4	3	4	1	0	2	0	0	0	0	0	0	0	0	0	0	3	4	2	2
28	2	1	3	2	1	4	3	3	1	2	0	3	1	3	2	3	4	1	4	2	0	0	1	0	0	0	0	0	0	0	0	0	2	1	2	2
30	3	3	3	3	3	3	3	3	3	3	3	3	3	3	2	2	2	2	3	0	0	0	0	0	0	0	0	0	0	0	0	0	3	2	1	2
24	2	3	4	1	4	4	4	4	4	4	3	4	4	2	4	3	4	3	4	1	1	0	0	0	0	0	0	0	0	0	0	0	3	4	3	3
15	0	0	0	2	4	4	2	1	2	1	2	1	2	2	2	2	3	2	4	0	0	0	0	0	0	0	0	0	0	0	0	0	2	2	2	2
25	4	4	4	4	4	4	4	4	4	4	4	4	4	4	4	4	4	4	4	0	0	1	0	0	0	0	0	0	0	0	0	0	3	2	2	3
30	4	3	4	4	4	3	4	4	4	3	4	2	2	4	4	3	4	3	4	0	0	0	0	0	0	0	0	0	0	0	0	0	4	2	2	3
23	4	4	4	3	4	4	4	4	4	4	2	4	4	2	4	4	4	4	4	0	0	0	0	0	0	0	0	0	0	0	0	0	3	2	2	2
28	4	4	4	4	4	2	3	3	4	4	4	4	2	4	2	4	3	3	4	0	0	2	1	0	0	0	0	0	0	0	0	0	4	3	3	3
24	0	3	3	3	4	4	4	4	3	4	4	4	4	4	3	3	4	4	4	0	0	0	0	0	0	0	0	0	0	0	0	0	4	5	3	4
29	1	2	1	2	4	2	2	0	2	2	2	1	3	2	1	2	2	1	4	0	0	0	0	0	0	0	0	0	0	0	0	0	3	1	2	2
22	4	4	4	2	4	3	3	3	4	2	1	4	2	1	2	4	4	1	3	2	1	3	1	0	0	0	0	0	0	0	0	3	3	1	1	2
28	4	4	4	4	3	3	3	4	3	3	3	4	2	4	4	3	3	2	3	0	0	0	0	0	0	0	0	0	0	0	0	0	3	1	2	2
21	2	0	0	2	0	0	0	0	0	0	1	0	0	1	0	0	0	0	0	2	1	1	0	0	0	0	0	0	0	0	0	0	3	4	3	4
31	3	4	4	1	4	4	2	2	2	1	2	2	2	1	2	2	3	2	2	1	3	1	1	1	1	1	0	0	0	0	0	0	3	1	1	2
23	3	3	3	2	4	3	3	3	4	2	3	2	2	3	4	3	3	3	4	0	0	0	0	0	0	0	0	0	0	0	0	0	3	1	2	2
19	4	4	2	3	4	4	0	4	4	4	3	0	4	3	3	3	4	0	4	0	0	0	0	0	0	0	0	0	0	0	0	0	2	1	2	2
21	2	4	4	4	4	3	2	2	4	3	4	4	4	2	2	2	3	4	4	0	2	0	0	0	0	0	0	0	0	0	1	1	2	1		2
27	4	1	1	0	1	3	2	3	3	3	4	3	3	4	3	3	3	3	3	3	0	3	2	0	2	0	0	0	0	0	0	0	2	2	2	3
34	2	4	0	2	4	4	4	4	4	4	4	2	4	0	2	1	4	2	4	0	0	0	0	0	0	0	0	0	0	0	0	0	3	2	2	2
21	3	3	4	1	4	4	4	4	3	4	4	3	4	4	3	2	4	2	4	2	0	0	0	0	1	0	0	0	0	0	0	0	3	1	1	2
30	2	2	3	2	3	2	2	2	3	2	1	2	2	1	1	2	2	2	2	1	1	0	0	0	0	0	0	0	0	0	0	0	3	4	2	3
34	3	3	3	2	4	2	3	4	3	3	4	4	2	3	3	3	3	3	3	2	1	1	0	0	0	0	0	0	0	0	0	0	4	5	2	2
24	4	4	4	0	4	4	4	4	2	3	4	4	4	4	0	2	4	3	4	2	0	3	0	0	0	0	0	0	0	0	0	0	3	2	2	2
33	0	1	2	0	2	0	1	0	2	1	0	1	2	0	1	2	1	2	2	2	1	2	1	0	0	0	0	0	0	0	0	0	3	1	1	2
30	2	4	4	4	4	4	3	4	4	4	3	3	4	3	4	4	4	4	4	0	0	0	0	0	0	0	0	0	0	0	0	0	3	2	2	2
26	1	4	4	0	4	4	4	4	4	4	2	4	4	2	4	4	4	3	4	0	0	0	0	0	1	0	0	0	0	0	0	0	3	1	2	2
22	3	4	4	3	4	4	4	4	4	4	3	3	4	4	4	4	4	3	4	0	0	0	1	0	0	0	0	0	0	0	0	0	4	2	3	4
26	3	3	3	2	4	3	3	4	3	3	4	3	3	3	3	3	3	3	4	0	0	0	0	0	0	0	0	0	0	0	0	0	3	1	1	2
23	2	2	0	0	0	3	2	2	3	2	0	2	3	2	2	2	3	2	4	0	0	0	0	0	0	0	0	0	0	0	0	0	3	4	1	2
16	4	4	4	1	4	4	4	4	4	4	2	4	4	2	4	4	4	4	4	0	0	0	0	0	0	0	0	0	0	0	0	0	3	2	2	2
22	4	4	4	4	4	4	3	4	4	4	4	3	2	4	4	4	3	4	4	0	0	0	0	0	0	0	0	0	0	0	0	0	3	1	2	2
25	0	1	2	1	2	1	0	1	4	1	3	2	1	0	0	2	1	1	2	2	1	0	0	0	0	0	0	0	0	0	0	0	3		1	1
23	4	4	4	1	4	1	4	4	4	4	4	4	4	4	1	2	4	4	4	0	0	0	0	0	0	0	0	0	0	0	0	0	3	3	2	2
23	4	4	4	4	4	4	4	3	4	4	4	4	4	4	3	3	4	3	4	0	0	0	0	0	0	0	0	0	0	0	0	0	3	2	3	2
31	1	1	2	2	3	2	3	2	2	2	1	2	3	0	3	1	3	2	3	2	0	0	0	0	0	0	0	0	0	0	0	0	3	2		3
29	4	4	3	4	4	2	4	4	3	3	2	4	2	4	4	3	3	4	4	0	0	0	0	0	0	0	0	0	0	0	0	0	3	1	2	4
21	2	2	2	3	3	3	3	1	2	2	3	2	2	1	3	3	2	2	3	2	1	0	0	0	0	0	0	0	0	0	0	0	4	5	3	2
33	1	3	4	1	4	3	4	4	4	3	1	3	3	3	2	2	4	2	4	0	0	0	0	0	1	0	0	0	0	0	0	0	4	2	2	2
30	4	4	4	4	4	4	4	4	4	4	4	4	4	4	4	4	4	4	4	1	0	0	0	0	0	0	0	0	0	0	0	0	3	2	2	3
35	4	4	4	0	4	4	4	4	4	4	4	4	4	4	4	4	4	4	4	0	0	0	0	0	0	0	0	0	0	0	0	0	3	4	2	4
21	1	4	4	4	4	4	4	4	4	4	1	1	4	1	4	4	4	4	4	1	1	0	0	0	0	0	0	0	0	0	0	0	3	4	3	3
21	3	3	4	4	4	4	4	4	4	3	2	4	4	4	4	3	3	3	4	0	0	0	0	0	0	0	0	0	0	0	0	0	3	4	2	4
16	4	1	4	4	4	2	3	2	1	1	3	2	1	4	4	4	3	4	4	2	1	0	0	0	1	0	0	0	0	0	0	0	3	2	3	2
22	0	0	1	1	1	0	1	1	1	1	4	2	2	2	2	2	2	2	2	0	0	0	0	0	0	0	0	0	0	0	0	0	2	1		2
45	4	4	4	4	4	4	4	4	4	4	4	4	4	4	4	4	4	4	4	0	0	0	0	0	0	0	0	0	0	0	0	0	3	4	3	4
20	4	3	4	3	4	4	3	4	4	4	4	3	3	4	4	4	3	3	4	0	0	0	0	0	0	0	0	0	0	0	0	0	3	2	2	2
28	4	4	4	4	4	4	4	4	4	4	3	4	4	3	4	4	4	4	4	1	0	0	0	0	0	0	0	0	0	0	0	0	3	4	2	3
26	2	1	4	2	2	1	1	2	1	2	3	1	2	2	2	3	2	2	3	1	0	2	0	0	0	0	0	0	0	0	0	0	3	2	2	2
27	2	3	3	2	2	3	3	3	2	2	3	2	3	3	2	2	2	2	2	1	0	0	2	0	0	0	0	0	0	0	0	0	3	2	2	3
21	4	3	4	4	3	4	4	4	3	4	4	4	3	4	4	4	4	4	4	0	0	0	0	0	0	0	0	0	0	0	0	0	3	2	2	3
31	1	1	2	0	0	1	1	1	0	0	1	1	0	1	1	1	1	0	0	0	0	0	0	0	0	0	0	0	0	0	0	0	3	5	3	3
32	4	4	4	4	4	4	4	4	4	4	3	4	4	4	4	4	4	4	4	0	0	0	0	0	0	0	0	0	0	0	0	0	3	2	2	2
28	1	2	2	2	3	1	1	2	3	2	2	2	2	2	2	2	1	1	2	0	0	0	0	0	0	0	0	0	0	0	0	0	2	2	2	2
26	3	4	4	4	4	3	4	4	4	2	4	4	2	4	4	4	2	4	4	2	2	2	1	1	2	1	0	0	0	0	0	0	3	4	3	4
27	3	2	2	1	1	3	1	2	1	1	3	2	1	3	2	1	1	2	1	0	0	0	0	0	0	0	0	0	0	0	0	0	3	2	2	3
19	2	3	4	3	3	3	4	4	4	4	3	3	3	3	3	3	3	3	3	0	0	0	0	0	0	0	0	0	0	0	0	0	3	2	2	3
22	4	4	4	3	4	4	3	4	4	4	4	4	4	4	3	4	4	4	4	1	0	0	0	0	0	0	0	0	0	0	0	0	4	4	2	3
26	4	3	3	4	4	3	3	3	4	4	2	3	3	2	3	3	4	4	4	0	0	0	0	0	0	0	0	0	0	0	0	0	3	1	2	2
26	4	4	4	4	4	4	4	4	4	4	4	4	4	4	4	4	4	4	4	0	0	0	0	0	0	0	0	0	0	0	0	0	3	2	2	2
19	3	3	3	4	4	3	3	3	4	4	4	3	3	4	3	3	3	4	4	0	0	0	0	0	0	0	0	0	0	0	0	0	3	1	2	2
23	3	4	3	3	4	2	3	4	4	4	3	4	4	3	4	4	4	4	4	0	0	0	0	0	0	0	0	0	0	0	0	0	3	1	2	3
28	4	4	4	3	4	3	4	4	4	3	2	3	2	4	2	4	3	4	4	0	0	0	0	0	0	0	0	0	0	0	0	0	2	1	1	2
27	1	1	2	1	2	2	1	2	2	0	1	2	1	2	1	1	2	2	2	0	0	0	0	0	0	0	0	0	0	0	0	0	3		2	4
25	4	4	4	4	4	4	4	4	4	4	4	4	3	4	4	4	4	4	4	0	1	1	0	0	0	0	0	0	0	0	0	0	3	2	2	2
15	4	4	4	4	4	4	4	4	4	4	4	4	4	4	4	4	4	3	4	0	0	0	0	0	0	0	0	0	0	0	0	0	3		2	2
26	4	3	3	4	4	4	4	4	4	4	4	4	4	4	3	3	4	3	4	0	1	0	1	0	0	0	0	0	0	0	0	0	3	2	1	2
21	1	4	4	2	4	4	4	4	4	4	1	4	4	4	4	4	4	3	4	1	1	2	0	0	0	0	0	0	0	0	0	0	2	2	1	2
22	4	4	4	4	4	4	4	4	4	4	4	4	4	4	4	4	4	4	4	1	1	0	0	0	0	0	0	0	0	0	0	0	4	2	3	3
27	4	4	4	4	4	4	4	4	4	4	4	4	4	4	4	4	4	4	4	1	0	0	0	0	0	0	0	0	0	0	0	0	3	1	2	4
20	3	2	3	2	3	3	2	3	3	4	4	3	2	4	3	2	3	2	3	0	0	0	0	0	0	0	0	0	0	0	0	0	2
23	3	2	2	1	2	2	2	1	2	2	2	1	2	1	1	2	1	1	2	2	0	0	0	0	0	0	0	0	0	0	0	0	3	1	2	3
25	2	2	3	0	3	3	2	1	3	2	1	2	1	2	2	2	2	2	3	0	0	1	0	0	1	0	0	0	0	0	0	0	3	1	2	2
34	4	4	4	2	2	3	2	2	4	4	4	2	2	2	2	2	2	2	4	0	0	0	0	0	0	0	0	0	0	0	0	0	3	2	2	4
32	4	4	4	4	4	4	4	4	4	2	2	4	3	4	3	3	3	2	4	0	0	0	0	0	0	0	0	0	0	0	0	0	4	5	3	2
29	2	1	2	1	2	1	2	2	2	2	1	2	2	1	1	2	1	1	1	3	2	2	1	1	0	0	0	0	0	0	0	0	3	3	2	2
16	4	4	4	4	4	4	4	4	4	4	4	4	4	4	4	4	4	4	4	0	0	0	0	0	0	0	0	0	0	0	0	0	3	2	2	2
31	4	4	3	2	4	2	3	2	4	4	2	3	3	2	2	2	3	4	4	2	1	1	0	0	0	0	0	0	0	0	0	0	3	2	2	3
26	2	3	3	2	4	3	2	2	3	2	2	3	2	2	2	2	1	2	4	0	0	0	0	0	0	0	0	0	0	0	0	0	3	2	2	4
26	4	4	4	4	4	4	4	4	4	4	4	4	4	4	4	4	4	4	4	0	0	0	0	0	0	0	0	0	0	0	0	0	3	4	2	2
15	2	2	2	4	2	3	1	2	1	2	3	2	2	3	2	2	2	2	3	0	0	0	0	0	0	0	0	0	0	0	0	0	3	1	2	2
30	4	4	4	4	4	4	4	4	4	4	4	4	4	4	4	4	4	4	4	2	2	2	2	1	0	0	0	0	0	0	0	0	3	2	2	3
27	4	3	4	3	4	4	3	2	4	3	4	0	3	4	3	3	3	3	4	0	0	1	0	0	0	0	0	0	0	0	0	0	3	1	2	2
24	3	2	4	1	4	1	4	3	2	2	4	3	4	2	4	4	3	2	2	0	2	0	0	0	0	0	0	0	0	0	0	0	3	2	1	2
20	2	4	4	4	2	3	3	3	4	3	1	3	3	1	2	2	3	3	3	0	0	2	0	2	2	0	1	0	0	0	0	0	3	1	2
30	4	1	1	2	3	1	2	1	2	3	4	1	0	3	0	1	2	0	2	3	1	0	0	0	0	0	0	0	0	0	0	0	3	2	2	2
37	4	3	4	3	3	3	4	4	3	3	2	3	3	2	3	4	2	3	3	0	0	0	0	0	0	0	0	0	0	0	0	0	3	2	2	2
22	3	3	3	0	2	3	4	3	2	1	2	4	3	4	3	3	3	3	3	1	0	0	0	0	0	0	0	0	0	0	0	0	3	2	2	2
16	4	4	4	4	4	4	3	4	4	4	3	3	4	4	3	3	4	3	4	1	0	0	0	0	0	0	0	0	0	0	0	0	3	4	2	4
16	1	3	4	4	4	2	4	2	4	3	4	4	4	4	4	4	4	4	4	0	1	0	0	0	0	0	0	0	0	0	0	0	2	1	3	3
29	4	4	4	4	4	2	2	4	4	4	1	3	4	1	3	2	2	2	4	0	0	0	0	0	0	0	0	0	0	0	0	0	3	4	2	2
21	4	3	4	4	4	4	4	4	4	4	4	4	4	4	4	4	4	3	3	0	0	0	0	0	0	0	0	0	0	0	0	0	3	2	2	2
30	4	4	0	4	0	0	2	4	0	0	0	4	0	0	0	0	0	2	2	0	0	0	0	0	0	0	0	0	0	0	0	0	2	4	2	1
28	1	2	2	1	2	2	1	2	1	1	1	2	3	2	1	1	0	0	1	0	0	0	0	0	0	0	0	0	0	0	0	0	3	2	1	2
27	4	4	4	3	4	4	4	4	4	4	4	3	4	3	3	4	4	2	4	0	0	0	0	0	0	0	0	0	0	0	0	0	3	2	1	2
21	3	2	4	1	4	3	3	3	3	3	1	4	3	2	3	3	3	3	4	0	0	0	0	0	0	0	0	0	0	0	0	0	3	4	2	3
16	4	4	4	4	4	4	4	4	4	4	4	4	4	4	4	4	4	4	4	0	0	0	0	0	0	0	0	0	0	0	0	0	3	1	2
24	4	2	4	4	4	4	2	4	4	4	2	4	4	2	2	2	4	4	4	0	0	1	1	0	0	0	0	0	0	0	0	0	4	5	3	3
28	2	1	3	1	1	2	1	1	3	2	2	2	2	1	2	1	2	2	1	0	0	1	0	0	0	0	0	0	0	0	0	0	3		2	2
26	4	3	3	3	4	4	4	4	4	4	3	4	4	4	4	4	4	3	3	0	0	0	0	0	0	0	0	0	0	0	0	0	3	1	2	2
30	4	4	4	4	4	4	3	4	4	4	4	4	4	4	4	4	4	3	4	0	0	0	0	0	0	0	0	0	0	0	0	0	4	5	3	3
21	0	4	4	2	4	4	3	4	4	4	1	4	4	2	4	4	4	4	4	2	0	0	0	0	0	0	0	0	0	0	0	0	4		2	2
25	0	2	4	1	4	4	2	1	4	4	4	2	2	4	2	4	4	4	4	0	0	0	0	0	0	0	0	0	0	0	0	0	2	2	2	3
34	4	2	3	2	3	2	1	2	3	2	3	2	1	3	1	2	3	2	3	0	0	1	0	0	0	0	0	0	0	0	0	0	3	2	1	2
20	4	4	4	3	4	4	4	4	4	4	4	3	4	3	4	3	4	4	4	0	0	0	0	0	0	0	0	0	0	0	0	0	3	3	2	2
23	4	4	4	3	4	4	4	4	4	4	4	4	4	4	4	4	4	4	4	0	0	0	0	0	0	0	0	0	0	0	0	0	3	4	2	4
24	4	4	4	4	4	4	4	4	4	4	4	4	4	4	4	4	4	4	4	0	0	0	0	0	0	0	0	0	0	0	0	0	3	2	2	2
31	3	3	2	3	3	3	2	2	2	2	3	2	2	3	3	3	3	2	3	2	2	2	0	0	1	0	0	0	0	0	2	0	4	5	3	3
24	0	0	2	4	4	4	4	4	4	4	4	2	4	4	4	2	0	1	4	0	0	0	0	0	0	0	0	0	0	0	0	0	2	2	2	2
24	2	0	2	2	1	2	1	3	0	2	2	2	1	2	2	1	1	1	3	0	2	0	0	0	0	0	0	0	0	0	0	0	3	1	1	2
17	4	2	2	3	4	4	3	2	4	4	2	4	2	2	2	2	3	2	4	0	0	0	0	0	0	0	0	0	0	0	0	0	3	2	2	1
20	4	3	4	0	4	2	2	1	1	1	4	0	2	2	1	0	2	2	3	0	0	0	0	0	0	0	0	0	0	0	0	0	3		1	1
24	0	2	1	1	2	2	2	1	2	2	0	2	2	1	2	1	4	1	3	0	2	0	0	0	0	0	0	0	0	0	0	0	3	1	2	3
18	2	2	2	4	4	4	4	4	4	4	4	3	4	4	4	4	4	4	4	0	0	0	0	0	0	0	0	0	0	0	0	0	3	1	1	2
23	4	4	2	2	4	4	1	3	4	3	4	3	3	4	3	3	4	3	4	2	0	1	0	0	0	0	0	0	0	2	1	0	3	1	1	2
28	3	3	3	2	4	3	4	3	4	3	3	4	3	3	4	4	3	3	4	3	2	3	0	0	0	0	0	0	0	0	0	0	3	6	3
27	4	3	4	0	3	4	2	4	4	4	4	4	4	4	3	4	3	4	4	0	3	0	1	0	0	0	0	0	0	0	0	0	3	2	1	2
20	4	4	4	3	4	4	4	4	4	3	4	4	4	3	4	4	4	3	4	2	1	0	0	0	0	0	0	0	0	0	0	0	3		3	4
20	2	3	4	4	4	4	4	4	4	4	4	4	4	4	4	4	4	4	4	0	0	0	0	0	0	0	0	0	1	0	0	0	3	4	1	4
25	2	3	1	1	4	4	2	4	4	4	3	2	4	3	3	3	3	2	4	0	0	0	0	0	0	0	0	0	0	0	0	0	4	4	3	4
16	2	0	2	2	4	4	4	4	2	2	4	2	2	2	2	2	2	3	4	0	0	0	0	0	0	0	0	0	0	0	0	0	2	1	2	2
23	4	2	4	2	4	4	4	4	4	4	4	4	4	4	4	4	4	4	4	2	2	0	0	0	0	0	0	0	0	0	0	0	3	2	3	4
26	3	4	2	1	2	2	3	3	4	3	2	2	2	2	2	2	2	2	4	0	0	0	0	0	0	0	0	0	0	0	0	0	3	4	2	2
23	4	4	4	4	4	3	4	4	4	4	4	4	4	4	4	4	4	4	4	1	0	1	0	0	0	0	0	0	0	0	0	0	3	2	2	2
18	4	4	4	4	4	3	3	3	4	3	4	4	3	4	3	4	4	3	4	0	0	0	0	0	0	0	0	0	0	0	0	0	3	2	3	2
31	3	2	2	2	2	3	2	2	2	2	3	2	2	3	2	2	3	2	2	3	1	3	1	0	0	0	0	0	0	0	0	0	3	2	3	4
27	4	4	3	4	4	4	3	4	4	4	4	4	4	4	4	4	4	3	4	0	0	0	0	0	0	0	0	0	0	0	0	0	4	5	2	3
20	1	2	1	1	2	4	3	2	4	4	1	4	2	0	2	0	3	1	4	1	1	0	0	0	0	0	0	0	0	0	0	0	3	2	2	3
19	4	4	4	4	4	4	4	4	4	4	4	4	4	4	4	4	4	4	4	0	0	0	0	0	0	0	0	0	0	0	0	0	3	2	3	3
27	1	1	1	0	1	0	1	1	0	0	3	1	1	4	2	1	2	1	2	1	1	0	0	0	0	0	0	0	0	0	0	0	3	2	3	4
16	0	4	4	2	4	4	4	4	4	4	4	4	2	4	2	4	2	2	4	0	0	0	0	0	0	0	0	0	0	0	0	0	2	2		1
22	4	4	4	4	4	4	4	4	4	4	4	4	2	4	2	2	2	1	2	2	0	0	0	0	1	0	0	0	0	0	0	0	3	2	1	2
30	3	2	2	3	3	3	3	2	2	2	3	2	2	3	2	2	3	3	2	1	0	0	0	0	0	0	0	0	0	0	0	0	3	2	2	4
40	4	4	4	4	4	4	3	4	4	3	3	4	3	3	4	4	4	4	4	0	0	0	0	0	0	0	0	0	0	0	0	0	4	4	3	3
24	2	2	3	3	4	3	3	3	4	3	1	1	2	1	2	1	2	2	3	0	1	1	0	0	1	0	0	0	0	0	0	0	3	1	2	2
19	4	4	4	4	4	4	4	2	2	2	2	2	2	2	2	2	4	2	4	0	0	0	0	0	0	0	0	0	0	0	0	0	3	1	2	2
21	1	2	4	3	4	3	2	4	4	2	0	1	2	4	1	4	2	1	4	1	1	0	0	0	0	0	0	0	0	0	0	0	3	1	2	2
25	0	1	1	1	2	2	1	2	2	1	2	1	1	2	2	1	2	1	2	0	0	0	0	0	0	0	0	0	0	0	0	0	3	1	1	1
29	1	4	4	4	2	4	4	4	2	4	4	4	3	4	4	4	4	4	2	0	0	0	0	0	0	0	0	0	0	0	0	0	3	4	2	3
17	2	4	4	4	4	4	4	4	4	2	4	4	4	4	4	4	4	4	4	1	0	2	0	0	0	0	0	0	0	0	0	0	3	1	3	4
29	0	0	2	2	4	4	4	0	4	4	2	2	4	2	0	2	4	4	4	0	0	0	0	0	0	0	0	0	0	0	0	0	3	3	2	3
22	2	4	1	4	4	3	4	4	3	2	1	2	2	1	2	1	2	2	1	1	0	0	0	0	0	0	0	1	0	0	2	0	3		2	1
18	4	2	2	3	3	2	1	1	2	3	4	2	2	3	1	1	2	1	3	0	0	0	0	0	0	0	0	0	0	0	0	0	2
22	2	1	4	1	3	2	3	2	4	1	2	4	3	2	4	3	2	2	2	0	0	0	0	0	0	0	0	0	0	0	1	0	2		2	4
19	2	3	4	1	4	4	4	3	4	3	3	3	2	3	4	4	3	3	4	1	0	0	0	0	0	0	0	0	0	0	0	0	3	1	2	3
32	4	4	4	4	4	4	4	4	4	4	4	4	4	4	4	4	4	4	4	0	0	0	0	0	0	0	0	0	0	0	0	0	3	4	2	3
29	2	3	3	3	4	3	4	3	4	4	3	3	3	3	4	4	4	3	4	0	0	0	0	0	0	0	0	0	0	0	0	0	3	2	3	2
19	4	4	4	4	4	4	4	4	4	4	4	4	4	4	4	4	4	4	4	0	0	0	0	0	0	0	0	0	0	0	0	0	3		3	3
39	4	4	3	2	4	4	4	4	4	4	4	2	4	4	4	4	4	4	4	0	0	0	0	0	1	0	0	0	0	0	0	0	3	2	2	2
24	4	1	2	1	2	1	2	1	1	1	1	1	1	2	1	1	1	2	2	0	0	0	0	0	0	0	0	0	0	0	0	0	3		2	1
25	4	4	4	0	4	4	2	4	4	4	0	4	4	2	4	2	4	4	4	0	0	0	0	0	0	0	0	0	0	0	0	0	4	2	2	2
27	2	1	2	1	2	2	2	1	3	4	1	1	1	2	1	2	3	1	4	0	0	0	0	0	0	0	0	0	0	0	0	0	3	1	2	1
23	4	4	3	2	4	4	4	3	4	4	4	3	4	4	4	4	4	4	4	2	2	1	1	0	0	0	0	0	0	0	0	0	3	1	2	2
31	2	2	2	3	4	4	2	2	4	4	2	2	2	4	2	1	2	2	4	0	0	0	0	0	0	0	0	0	0	0	0	0	3	2	2	4
25	1	1	2	1	2	2	2	2	2	2	2	1	2	1	2	2	2	2	2	0	0	0	0	0	0	0	0	0	0	0	0	0	3	4	2	2
23	4	4	4	4	4	4	4	4	4	4	4	4	4	4	4	4	4	4	4	0	0	0	1	0	0	0	0	0	0	0	0	0	3	2	2	3
22	4	2	1	3	4	4	2	2	4	2	2	3	4	4	2	3	3	2	4	0	0	0	0	0	0	0	0	0	0	0	0	0	3	1	2	2
27	0	0	1	1	2	2	2	1	2	1	2	2	2	1	1	1	2	2	1	0	0	0	0	0	0	0	0	0	0	0	0	0	3	2	2	3
19	4	4	4	4	4	4	4	4	4	4	4	4	4	4	4	4	4	4	4	3	3	0	0	0	0	0	0	0	0	0	0	0	3	1	2	3
22	2	2	2	2	3	2	2	3	2	3	3	3	4	3	3	4	3	1	3	0	0	0	0	0	0	0	0	0	0	0	0	0	3	4	2	3
25	4	4	4	4	4	4	4	0	4	4	4	4	0	4	0	0	4	2	4	0	0	0	0	0	0	0	0	0	0	0	0	0	2	1	1	1
21	1	1	1	1	1	0	1	0	1	0	1	1	0	1	1	1	1	1	1	3	3	3	0	0	0	0	0	0	0	0	0	0	3	1	1	2
20	4	1	3	4	3	0	2	2	0	0	4	0	1	4	1	1	1	0	2	1	0	1	0	0	0	0	0	0	0	0	0	0	4	2	3	4
24	1	2	4	4	4	2	4	4	4	3	2	3	3	3	4	2	2	2	4	0	0	0	0	0	0	0	0	0	0	0	0	0	3	2	2	2
23	2	2	3	4	3	2	2	3	4	4	4	4	4	4	4	3	4	3	4	0	0	0	0	0	0	0	0	0	0	0	0	0	4	2	2	3
30	2	3	4	4	4	3	3	4	4	2	1	4	3	4	4	4	4	4	4	0	0	0	0	0	0	0	0	0	0	0	0	0	2	2	2	2
24	4	4	4	4	3	3	3	3	4	3	4	4	3	4	3	3	3	3	4	1	0	1	0	0	0	0	0	0	0	0	0	0	4		1	2
26	4	4	4	4	4	4	4	4	4	4	3	4	4	4	4	4	4	4	4	0	0	0	0	0	0	0	0	0	0	0	0	0	3	2	2	2
30	0	2	2	4	2	2	3	4	3	3	2	3	2	1	3	2	2	2	3	0	0	0	0	0	0	0	0	0	0	0	0	0	3	2	2	2
26	2	4	4	4	4	3	3	4	4	3	3	4	2	4	2	4	3	4	4	0	0	0	0	0	0	0	0	0	0	0	0	0	3	2	2	2
21	0	1	0	4	4	0	0	0	0	2	0	2	2	1	0	0	2	0	2	0	0	0	0	0	0	0	0	0	0	0	0	0	3	2	2	2
26	4	4	4	3	1	4	3	3	4	4	4	4	3	4	4	4	4	4	2	2	1	0	1	1	0	0	0	0	0	0	0	0	2	4	1	2
21	1	1	2	3	1	0	1	1	2	2	1	2	1	1	2	2	2	2	2	1	0	2	2	0	0	0	0	0	0	0	0	0	3	3	2	2
22	1	4	4	0	2	4	3	2	3	1	0	2	1	2	2	2	2	1	2	1	0	0	0	0	0	0	0	0	0	0	0	0	3
16	2	2	1	2	4	4	3	3	4	4	3	3	3	4	2	2	3	2	4	2	0	0	0	0	0	0	0	0	0	0	0	0	3	2	2	2
32	4	1	3	4	3	1	2	1	3	2	3	2	2	3	1	2	2	1	3	1	0	1	0	0	0	0	0	0	0	0	0	0	3	2		2
29	4	3	3	2	3	4	3	3	3	3	2	2	3	3	3	3	3	3	4	0	1	1	0	0	0	0	0	0	0	0	0	0	3	2	2	2
19	4	4	4	4	4	4	4	4	4	4	4	4	4	4	4	4	4	4	4	0	0	0	0	0	0	0	0	0	0	0	0	0	3	2	2	2
24	2	4	4	2	3	3	3	3	4	3	1	4	3	1	3	3	3	3	4	0	0	0	0	0	0	0	0	0	0	0	0	0	4	2	2	3
16	0	1	2	1	4	4	0	1	4	4	2	4	4	2	4	2	4	4	4	0	0	1	0	0	0	0	0	0	0	0	0	0	2	1	1	4
20	2	4	3	4	4	2	2	1	2	3	3	2	2	3	1	1	3	1	4	0	0	0	0	0	0	0	0	0	0	0	0	0	3	1	1	2
25	4	3	4	3	3	3	3	3	2	2	3	2	4	4	2	2	2	2	2	1	0	0	0	0	1	0	1	0	0	0	0	0	3	2	2	2
20	0	1	2	0	0	2	2	2	2	2	0	0	0	2	2	2	2	2	2	0	0	0	0	0	0	0	0	0	0	0	0	0	3	2	2	2
23	4	4	3	4	4	4	3	3	4	2	4	4	3	4	4	4	4	3	4	1	1	1	1	0	0	0	0	0	0	0	0	0	4	4	3	4
27	2	2	3	4	4	1	4	1	4	2	2	1	1	1	1	1	1	2	3	0	0	0	0	0	0	0	0	0	0	0	0	0	3	6	1	2
24	2	4	4	1	4	4	4	4	4	4	4	4	4	4	1	4	2	4	4	1	0	0	0	0	0	0	0	0	0	0	0	0	3	2	2	4
19	4	4	4	3	4	4	3	4	4	4	4	4	4	4	4	4	4	4	4	0	0	0	0	0	0	0	0	0	0	0	0	0	4	4	3	3
22	0	1	1	1	4	4	1	2	4	4	2	2	3	2	2	2	4	2	4	1	1	0	0	0	0	0	0	0	0	0	0	0	2	2	2	4
21	2	2	3	3	2	2	2	3	1	1	0	3	2	1	2	2	2	2	1	2	2	2	0	0	0	0	0	0	0	0	0	0	3	1	2	2
36	3	3	3	3	3	3	3	3	3	3	3	2	3	3	3	3	3	2	3	2	0	0	0	0	0	0	0	0	0	0	0	0	4	5	2	3
28	1	1	1	1	1	1	1	1	1	1	1	1	1	1	1	1	1	1	1	0	0	0	0	0	0	0	0	0	0	0	0	0	4	1	2	2
28	4	4	4	3	4	2	3	3	4	4	4	3	2	4	2	2	3	3	1	2	0	2	0	0	0	0	0	0	0	0	0	0	3	2	2	3
26	4	3	3	4	4	4	3	4	4	4	4	3	4	4	3	3	4	2	4	1	0	0	0	0	0	0	0	0	0	0	0	0	3	4	2	2
27	4	4	4	4	4	2	2	4	4	4	4	4	4	4	4	2	2	3	3	2	1	2	0	0	0	0	0	0	0	0	0	0	4	1	2	3
24	4	4	4	4	4	4	4	4	4	4	4	4	4	4	4	4	4	4	4	0	0	1	0	0	0	0	0	0	0	0	0	0	4	5	3	4
32	1	1	2	4	4	4	4	4	4	4	4	3	4	4	4	4	4	3	4	0	0	0	0	0	0	0	0	0	0	0	0	0	3	1	1	2
16	4	2	4	4	4	3	4	4	1	2	3	4	3	3	3	4	3	3	2	0	0	0	0	0	0	0	0	0	0	0	0	0	3	2	3	3
18	4	3	4	4	4	2	3	3	4	3	3	3	3	2	4	4	3	3	4	0	0	0	0	0	0	0	0	0	0	0	0	0	3	1	2	2
15	4	1	2	2	4	4	2	2	4	2	2	2	2	3	4	2	2	2	4	0	1	0	0	0	0	0	0	0	0	0	0	0	2	1	2	4
29	3	2	3	3	4	2	2	3	4	2	3	2	3	2	4	2	2	2	4	0	0	0	0	0	0	0	0	0	0	0	0	0	3	1	2	2
32	1	4	4	4	4	4	2	4	4	3	3	4	4	4	2	2	3	4	4	0	0	0	0	0	0	0	0	0	0	0	0	0	3	1	2	2
30	1	4	3	0	4	4	4	4	4	4	4	4	4	0	1	1	1	2	2	0	0	0	0	0	0	0	0	0	0	0	0	0	3	1	1	2
32	3	2	3	4	3	2	2	2	3	3	3	3	3	3	2	3	2	2	2	0	0	0	0	0	0	0	0	0	0	0	0	0	2	2	1	2
28	4	4	4	4	4	2	4	4	4	4	4	4	4	4	4	4	4	4	4	0	0	0	0	0	0	0	0	0	0	0	0	0	3	2	1	2
17	4	2	4	3	4	4	3	3	4	3	3	3	3	3	3	2	2	3	4	0	0	0	0	0	0	0	0	0	0	0	0	0	3		2	2
31	1	4	4	4	4	4	4	2	4	3	4	4	4	4	4	4	4	2	3	0	0	0	0	0	0	0	0	0	0	0	0	0	3	2	2	2
33	2	3	4	0	2	3	1	3	1	1	2	2	1	2	2	2	2	1	4	2	2	0	0	0	0	0	0	0	0	0	0	0	3	4	2	2
26	1	1	1	1	3	2	2	2	2	2	2	2	1	2	1	1	2	2	2	0	0	0	0	0	0	0	0	0	0	0	0	0	4	2	2	4
26	4	3	2	4	4	3	3	4	3	3	4	4	2	4	3	3	3	3	4	0	0	0	0	0	0	0	0	0	0	0	0	0	3	4	2	2
30	1	2	2	1	2	2	3	2	2	1	1	2	1	1	0	1	2	1	2	0	0	0	0	0	0	0	0	0	0	0	0	0	3	4	2	2
21	2	2	3	3	3	1	2	3	2	1	4	2	2	4	1	1	2	2	3	2	0	0	0	0	0	0	0	0	0	0	0	0	3	2	2	3
24	1	4	4	4	2	4	4	4	4	4	4	4	4	4	4	4	4	4	4	0	0	0	0	0	0	0	0	0	0	0	0	0	3	2	2	3
16	4	4	4	3	4	4	4	4	4	4	4	4	4	4	4	4	4	4	4	0	0	0	0	0	0	0	0	0	0	0	0	0	2	4		4
19	0	1	3	0	1	3	2	2	1	2	1	1	3	0	2	2	3	2	4	0	0	0	1	1	0	0	0	0	0	1	2	3	2	1	2	2
19	2	0	4	2	1	0	1	2	2	2	2	2	2	2	2	1	2	1	2	1	0	0	0	0	0	0	0	0	0	0	0	0	2	2	1	2
20	4	4	4	1	4	4	4	4	4	4	1	4	4	1	1	1	4	4	4	2	0	0	0	0	0	0	0	0	0	0	0	0	3	4	2	2
28	4	3	4	3	4	4	3	4	4	3	3	3	4	4	2	3	3	2	4	0	0	1	0	0	0	0	0	0	0	0	0	0	3	5	3	3
24	0	2	0	2	4	4	2	2	1	1	2	2	3	3	3	3	2	3	3	0	0	0	0	0	0	0	0	0	0	0	1	0	3	6	2	3
21	2	4	3	1	2	1	3	2	3	2	1	2	2	1	2	2	3	3	3	0	1	0	0	0	0	0	0	0	0	0	0	0	3	1	1	2
17	4	3	4	4	4	4	2	2	4	4	4	3	4	4	3	2	3	2	4	0	0	0	0	0	0	0	0	0	0	0	0	0	3	2	2	2
31	4	4	4	3	4	4	4	4	4	4	3	4	4	4	4	4	4	4	4	0	0	0	0	0	0	0	0	0	0	0	0	0	3	3	2	2
27	4	4	4	4	3	3	3	3	2	2	4	3	2	3	1	2	2	2	2	0	0	0	0	0	0	0	0	0	0	0	0	0	3	2	2	2
23	3	2	4	1	3	3	3	3	2	3	2	3	1	2	1	2	1	1	1	0	0	0	0	0	0	0	0	0	0	0	0	0	2	2		2
24	2	4	4	2	4	3	3	3	4	4	3	3	3	3	2	4	3	2	4	0	0	0	0	0	0	0	0	0	0	0	0	0	2	1	1	2
25	2	1	3	4	2	4	2	1	3	3	2	4	3	0	3	2	1	4	3	2	0	0	0	0	1	0	0	0	0	0	0	0	3		3	3
21	4	2	2	2	4	4	1	1	4	2	4	2	2	3	1	3	3	3	4	3	2	0	0	1	0	0	0	0	0	0	0	0	2	1	2	2
28	2	2	4	1	2	2	2	1	2	2	1	0	2	1	1	2	1	1	2	1	0	0	0	0	0	0	0	0	0	0	0	0	3	1	1	3
29	2	3	2	2	3	3	2	3	3	3	3	2	3	2	1	2	3	3	1	1	1	2	0	0	0	0	0	0	0	0	0	0	3	2	2	3
34	0	4	4	4	4	4	4	4	4	4	4	4	4	4	4	4	4	4	4	2	0	0	0	0	0	0	0	0	0	0	0	0	3	1	2	3
25	0	0	2	2	2	1	2	0	2	3	3	1	2	1	1	2	1	0	2	0	0	0	0	0	0	0	0	0	0	0	0	0	3	2	2	2
19	0	1	3	1	1	2	3	2	1	1	2	3	2	2	0	2	1	2	2	3	2	2	3	0	0	0	0	0	0	0	0	0	3	5	3	4
29	0	0	0	0	1	0	0	1	1	1	4	0	2	4	2	2	2	2	2	1	1	0	0	0	0	0	0	0	0	0	0	0	3	1	3	3
26	4	4	3	3	4	3	3	4	4	3	4	3	3	4	3	3	3	3	4	1	0	0	0	0	0	0	0	0	0	0	0	0	4	5	3	4
28	2	3	2	1	3	2	3	2	3	3	3	2	3	3	1	2	3	2	3	0	0	2	0	1	1	0	0	0	0	0	0	0	3	4	2	3
17	4	3	4	3	4	4	3	3	4	4	4	4	4	4	3	4	4	3	4	0	0	0	0	0	0	0	0	0	0	0	0	0	3	2	2	2
21	2	3	3	2	4	4	2	2	2	2	2	2	3	3	1	2	2	2	2	1	0	0	0	0	0	0	0	0	0	0	0	0	3	1	2	3
29	4	3	4	2	4	2	3	3	4	3	3	4	3	3	2	2	3	3	4	2	0	0	0	0	0	0	0	0	0	0	0	0	3	4	2	2
29	3	3	3	1	4	2	2	1	2	2	2	2	2	2	3	2	2	2	2	3	2	1	0	2	0	0	0	0	0	0	0	0	3	4	2	2
30	3	4	4	4	4	4	3	4	4	4	3	3	3	4	4	3	4	3	4	2	2	0	0	0	0	0	0	0	0	0	0	0	4	4	2	2
25	4	4	4	4	4	4	4	4	4	4	4	4	4	4	4	4	4	4	4	1	1	0	0	0	0	0	0	0	0	0	0	0	3		2	2
23	3	4	3	3	3	3	3	3	4	3	2	3	3	3	2	2	3	2	4	2	1	1	0	0	0	0	0	0	0	0	0	0	3	2	2	3
34	2	2	2	2	4	3	2	2	2	3	2	1	4	0	4	0	2	2	3	0	0	0	0	0	0	0	0	0	0	0	0	0	3	2	2	3
20	4	3	4	4	4	4	4	4	4	4	4	3	4	4	3	3	4	4	4	0	0	3	0	0	0	0	0	0	0	0	0	0	4	4	3
24	4	4	4	4	4	4	4	4	4	4	4	4	4	4	4	4	4	4	4	0	0	0	0	0	0	0	0	0	0	0	0	0	3		2
24	2	3	4	1	4	1	4	4	3	3	2	4	2	2	4	4	4	4	4	0	0	0	0	0	0	0	0	0	0	0	0	0	3	2	2	2
30	0	1	0	0	1	2	1	0	4	4	0	2	4	2	3	2	3	3	4	0	0	0	0	0	0	0	0	0	0	0	0	0	3	1	1	3
22	4	4	3	2	4	2	2	2	1	1	0	0	1	0	0	1	0	1	1	1	0	0	0	0	0	0	0	0	0	0	0	0	3	2	2	2
28	2	2	1	1	2	3	1	2	1	0	0	0	1	2	0	0	2	0	2	1	0	1	0	0	0	0	0	0	0	0	0	0	3	1	2	2
18	0	2	2	2	4	4	2	2	4	4	0	1	1	1	1	1	3	4	4	0	0	0	0	0	0	0	0	0	0	0	0	0	3	2	2	3
24	3	3	3	4	4	4	4	4	4	4	4	4	4	2	3	4	4	3	4	0	0	0	0	0	1	0	0	0	0	0	0	0	3	3	2	2
29	1	2	3	2	2	2	2	3	2	2	2	3	2	2	2	3	2	2	2	2	0	0	0	0	0	0	0	0	0	0	0	0	3	2	2	3
21	4	3	3	4	4	4	3	4	3	4	4	3	3	4	3	3	3	3	4	0	0	0	0	0	0	0	0	0	0	0	0	0	3	2	2	2
39	4	4	4	3	4	4	4	4	4	4	4	4	4	4	4	4	4	4	4	1	0	0	0	0	0	0	0	0	0	0	0	0	3	2	2	4
37	2	3	2	2	2	2	2	1	2	2	4	3	2	4	2	3	2	2	2	0	0	0	0	0	0	0	0	0	0	0	0	0	3	2	2	3
21	3	1	2	1	4	2	2	1	2	1	3	1	1	2	1	1	2	1	1	0	0	0	0	0	0	0	0	0	0	0	0	0	3	6	2	3
24	1	2	3	1	2	3	3	2	2	1	1	2	2	2	2	2	2	2	2	2	0	1	0	0	1	0	0	0	0	0	0	0	3	4	3	4
35	2	2	2	3	3	2	2	2	1	1	1	1	2	1	2	2	2	2	2	3	2	0	0	0	0	0	0	0	0	1	0	1	3	3	2	2
32	1	2	1	1	3	1	2	1	4	4	1	2	3	1	0	2	4	0	4	0	0	0	0	0	0	0	0	0	0	0	0	0	3	1	2	3
28	2	4	3	2	3	2	2	3	3	3	0	2	3	1	4	3	3	3	3	0	0	0	0	0	0	0	0	0	0	0	0	0	4	4	3	3
26	4	3	4	3	4	3	4	4	3	3	1	3	3	3	3	4	4	3	4	0	0	0	0	0	0	0	0	0	0	0	0	0	4	4	2	3
43	2	2	2	2	3	2	2	2	2	2	2	2	2	2	2	2	2	2	3	0	0	0	0	0	0	0	0	0	0	0	0	0	3	4	2	2
17	4	3	4	4	4	3	4	3	4	4	4	3	2	4	4	3	3	4	4	0	0	0	0	0	0	0	0	0	0	0	0	0	3	2	2	2
22	4	4	3	1	4	4	4	4	4	4	1	4	4	1	4	4	4	4	4	1	0	2	0	0	2	0	0	0	0	0	0	0	3	5	3	4
35	4	4	4	4	4	4	4	4	4	4	4	2	3	4	3	4	4	4	4	0	0	0	0	0	0	0	0	0	0	0	0	0	3	2	2	2
28	4	4	4	4	4	4	4	4	4	4	4	4	4	4	3	3	4	4	4	0	0	0	0	0	0	0	0	0	0	0	0	0	3	2	2	3
23	4	4	4	4	4	4	4	4	4	4	4	4	4	4	4	4	4	4	4	0	0	0	0	0	0	0	0	0	0	0	0	0	3	1	2	2
20	4	4	4	3	4	4	3	3	4	4	3	4	3	4	3	3	3	3	4	1	0	0	0	0	0	0	0	0	0	0	0	0	3	2	2	2
23	4	4	3	4	4	4	3	3	4	4	3	4	4	3	4	3	3	3	4	0	1	1	0	0	0	0	0	0	0	0	0	0	3	5	3	4
19	4	4	3	2	3	4	2	2	4	3	0	3	2	2	2	1	3	2	4	0	0	0	0	0	0	0	0	0	0	0	0	0	3	1	2	2
30	4	4	4	2	4	3	4	4	4	3	4	4	3	4	4	4	4	4	3	0	0	1	0	0	0	0	0	0	0	0	0	0	4	5	3	4
26	4	4	4	3	4	2	4	4	4	3	4	4	4	4	4	4	2	3	4	1	0	0	0	0	0	0	0	0	0	0	0	0	3	4	3	3
21	1	3	3	4	4	2	2	3	4	3	3	1	1	3	1	2	2	1	3	0	0	0	0	0	0	0	0	0	0	0	0	0	3	5	3	4
29	3	4	4	3	4	3	4	3	4	4	4	4	3	4	4	4	3	3	4	0	0	0	0	0	0	0	0	0	0	0	0	0	2	1	1	3
25	2	3	2	3	4	2	2	3	3	2	4	2	3	3	3	3	3	3	4	0	0	0	0	0	0	0	0	0	0	0	0	0	3	2	3	4
26	4	2	3	3	4	3	3	3	3	3	4	3	3	3	3	3	3	3	3	1	0	1	0	0	0	0	0	0	0	0	0	0	3	2	1	3
32	3	2	3	2	2	2	2	2	4	2	2	3	2	2	2	2	2	1	3	1	1	0	0	0	0	0	0	0	0	0	0	0	3	4	2	3
27	1	1	1	0	1	1	1	1	2	1	1	1	1	2	1	1	1	2	2	3	2	3	1	1	1	0	0	0	0	0	0	0	3	1	2	2
23	4	4	4	2	4	3	4	4	4	4	4	3	3	3	2	2	2	2	4	3	2	2	0	0	0	0	0	0	0	0	0	0	3	1	2	3
22	1	1	1	1	2	0	2	2	2	3	3	2	2	2	2	2	2	2	2	0	0	1	1	1	0	0	0	0	0	0	0	0	1	1	1	1
25	3	4	4	2	2	1	1	1	2	2	1	2	1	1	1	1	1	1	2	0	0	1	0	0	0	0	0	0	0	0	0	0	3	2	2	2
30	4	4	4	4	4	4	4	4	4	4	4	4	4	3	3	3	4	4	4	0	0	0	0	0	0	0	0	0	0	0	0	0	4	2	2	2
23	1	1	1	1	1	4	1	1	1	2	1	1	1	4	4	4	1	2	1	0	0	0	0	0	0	0	0	0	0	0	0	0	2	2	2	2
17	1	1	2	3	2	4	3	3	4	2	2	2	2	2	2	1	2	2	2	2	0	0	0	0	0	0	0	0	0	0	0	0	2	1	2	2
29	2	2	3	2	2	2	2	2	2	2	1	2	2	4	1	2	2	2	1	0	0	0	0	0	0	0	0	0	0	0	0	0	3	2	2	2
26	4	2	2	3	1	1	2	3	2	2	0	2	2	0	0	2	2	2	0	3	2	1	0	0	1	0	0	0	0	1	1	1	3	4	2	3
42	2	3	3	2	3	2	3	4	4	3	2	3	3	2	4	3	3	3	3	0	2	0	0	0	0	0	0	0	0	0	0	0	3	2	3	3
21	4	3	4	4	4	4	3	2	4	4	4	2	2	4	0	2	4	3	4	3	0	0	0	0	0	0	0	0	0	0	0	0	3	1	2	2
29	0	0	1	1	0	0	0	0	0	0	1	0	0	0	0	0	0	0	0	0	0	0	0	0	0	0	0	0	0	0	0	0	3	2	2	2
22	3	2	2	3	3	2	2	2	2	2	3	2	3	3	2	2	2	2	3	0	0	0	0	0	0	0	0	0	0	0	0	0	3	2	2	3
26	4	3	4	2	4	3	4	2	4	3	2	2	2	3	3	3	3	3	4	0	0	0	0	0	0	0	0	0	0	0	0	0	3	2	1	2
29	4	3	3	4	4	2	3	3	3	2	3	3	4	2	1	1	3	3	4	2	0	0	2	0	0	0	0	0	0	0	0	0	3	1	2	2
21	4	4	4	3	4	4	3	4	4	4	3	3	4	4	4	4	4	4	4	2	0	0	0	0	0	0	0	0	0	0	0	0	3	4	3	3
26	4	4	4	4	4	4	4	4	4	4	4	4	4	4	4	4	4	4	4	0	0	0	0	0	0	0	0	0	0	0	0	0	3	3	2	2
22	0	2	3	0	3	2	4	3	4	4	2	4	4	1	3	3	2	3	3	2	1	2	0	0	1	0	0	0	0	0	0	0	3	2	2	2
33	4	4	4	4	4	4	4	4	4	4	4	4	4	4	4	4	4	4	4	0	0	0	0	0	0	0	0	0	0	0	0	0	3	4	2	3
20	4	4	4	2	4	4	2	4	4	2	1	4	4	2	4	2	4	4	4	1	0	1	0	0	0	1	1	0	0	0	0	0	3	2	2	3
29	4	4	4	4	3	4	4	4	4	4	4	3	4	4	3	3	3	3	3	0	0	0	0	0	0	0	0	0	0	0	0	0	4	5	3	2
29	4	2	2	4	4	4	2	2	4	2	3	2	2	4	2	2	4	3	4	0	0	0	0	0	0	0	0	0	0	0	0	0	3	4	2	2
34	3	4	4	2	4	4	4	3	4	4	2	4	2	2	4	2	4	2	4	0	0	0	0	0	0	0	0	0	0	0	0	0	3	2	3	4
34	1	4	2	1	4	1	3	3	2	2	1	1	2	0	1	1	3	3	2	3	3	1	3	0	0	0	0	0	0	0	0	0	3	3	2	2
27	4	4	3	4	4	4	3	4	4	4	3	4	3	3	4	4	4	4	4	3	3	1	0	0	0	0	0	0	0	0	0	0	4	1	2	3
28	4	4	3	1	4	4	3	4	4	4	1	1	3	3	3	3	4	4	4	0	1	0	1	0	0	0	0	0	0	0	0	0	2	2	2	2
29	4	4	4	4	4	4	4	4	4	4	4	4	4	4	4	4	4	4	4	2	0	2	0	0	0	0	0	0	0	0	0	0	4	2	2	4
25	4	2	4	4	4	4	4	4	4	4	4	4	3	3	3	4	4	3	3	2	1	0	0	0	0	0	0	0	0	0	0	0	3	3	3	3
15	4	3	4	4	4	4	4	4	4	4	4	4	3	4	4	4	1	3	4	0	0	0	0	0	0	0	0	0	0	0	0	0	2	4	2	2
25	4	4	4	4	4	4	4	4	4	4	4	4	4	4	4	4	4	4	4	0	0	0	0	0	0	0	0	0	0	0	0	0	3	2	2	3
37	2	3	2	0	2	2	2	3	2	3	2	2	3	3	4	3	2	4	4	3	2	2	2	0	0	0	0	0	0	0	0	0	2	2	1	2
24	1	3	2	3	2	4	4	2	4	4	2	4	4	4	2	4	4	4	4	0	0	0	0	0	0	0	0	0	0	0	0	0	3	2	2	2
28	4	4	4	4	4	4	4	4	4	4	4	4	4	4	4	4	4	4	4	0	0	0	0	0	0	0	0	0	0	0	0	0	3	3	2	2
27	4	4	4	4	4	4	4	3	3	3	4	3	3	4	4	4	4	4	4	0	0	0	0	0	0	0	0	0	0	0	0	0	3	2	3	3
30	4	4	4	4	4	3	4	4	4	4	4	4	4	4	4	4	4	4	4	0	0	0	0	0	0	0	0	0	0	0	0	0	1	1	2	2
32	3	2	2	1	1	3	2	1	1	0	2	0	1	2	0	1	1	1	2	1	0	0	0	0	0	0	0	0	0	0	0	0	3	2	2	3
19	4	3	4	4	4	3	3	4	4	4	4	4	4	4	4	4	4	4	4	0	0	0	0	0	0	0	0	0	0	0	0	0	3		2	2
17	2	4	0	4	4	4	4	4	4	4	4	4	2	4	4	4	2	4	4	0	0	0	0	0	0	0	0	0	0	0	0	0	3		3	4
41	2	2	3	1	2	1	4	4	3	2	2	1	1	2	3	2	2	2	4	0	0	0	0	0	0	0	0	0	0	0	0	0	3	4	2	2
26	4	4	4	1	3	3	4	4	4	3	1	2	4	2	3	4	4	3	3	2	1	0	0	0	1	0	0	0	0	0	0	0	3	4	2	4
19	2	2	3	1	4	2	2	2	3	3	1	3	2	2	2	2	2	2	4	2	1	0	0	0	0	0	0	0	0	0	0	0	3	4	3	3
21	1	2	4	4	4	4	2	2	2	1	2	1	4	4	4	2	2	2	4	3	2	1	0	0	1	0	0	0	0	0	0	0	3	2	1	2
23	0	2	0	2	4	2	2	2	3	4	0	2	2	3	2	3	4	4	4	0	0	0	0	0	0	0	0	0	0	0	0	0	2	5	3
20	0	1	4	1	4	3	4	4	3	2	4	4	2	3	3	3	2	3	4	0	0	0	0	0	0	0	0	0	0	0	0	0	3	1	1	2
27	3	3	2	2	2	3	2	3	3	2	1	2	3	2	1	2	2	3	3	1	1	1	1	1	0	0	0	0	3	0	0	0	3	2	2	3
28	2	2	3	2	3	2	2	3	3	2	2	3	2	3	2	2	3	2	2	0	1	2	2	0	0	0	0	0	0	0	0	0	4	2	2	2
28	1	2	3	1	2	3	2	2	4	3	2	2	2	3	2	2	3	2	4	1	0	2	0	0	0	0	0	0	0	0	0	0	3	2	3	4
25	0	2	2	0	3	1	2	2	1	1	1	2	1	1	2	1	2	1	3	0	0	0	0	0	0	0	0	0	0	0	0	0	3	3	2	2
35	0	1	2	2	1	1	1	2	3	3	1	1	0	1	2	1	2	2	3	0	0	0	0	0	0	0	0	0	0	0	0	0	4	1	2	2
25	4	2	3	4	4	3	3	3	3	3	4	3	3	4	2	3	3	3	3	0	0	1	1	0	0	0	0	0	0	0	0	1	3	2	2	3
20	4	4	2	4	4	4	4	4	4	4	4	4	4	4	4	4	4	4	4	2	0	0	0	0	0	0	0	0	0	0	0	0	3	4	2	4
23	4	4	4	4	4	3	4	4	4	4	4	4	4	4	4	4	4	4	4	3	0	2	0	0	0	0	0	0	0	0	0	0	3	2	2	4
34	3	4	3	3	4	4	2	3	4	3	2	2	2	4	2	2	4	4	4	0	0	0	0	0	0	0	0	0	0	0	0	0	4	4	3	4
31	3	3	4	3	4	4	4	4	4	4	4	4	3	4	3	4	4	4	4	0	0	0	0	0	0	0	0	0	0	0	0	0	3	2	3	4
22	4	3	4	4	4	4	4	4	4	4	3	4	4	4	4	4	4	4	4	1	1	0	0	0	0	0	0	0	0	0	0	0	3	2	3	3
30	0	1	0	2	4	2	2	0	4	4	0	0	0	0	0	0	0	0	4	0	0	0	0	0	0	0	0	0	0	0	0	0	3	1	2	2
23	4	2	2	4	4	4	2	2	4	2	4	2	2	4	2	2	4	2	4	0	0	0	0	0	0	0	0	0	0	0	0	0	4	4	2	4
22	1	2	2	4	4	2	2	2	2	2	2	2	2	4	2	2	2	2	2	2	2	0	0	0	0	0	0	0	0	0	0	0	3	2	2	3
19	1	2	2	2	4	2	3	4	4	4	4	4	2	4	4	4	4	4	4	0	0	2	0	0	0	0	0	0	0	0	0	0	3	5	3	4
22	4	4	4	4	4	4	3	4	4	1	4	3	4	4	3	3	4	3	4	0	0	0	0	0	0	0	0	0	0	0	0	0	3	2	2	2
23	1	1	0	1	1	1	0	1	1	1	1	2	1	1	1	1	0	1	1	0	0	0	0	0	0	0	0	0	0	0	0	0	2	2	1	2
30	1	2	1	1	1	2	1	1	1	1	1	2	1	1	2	1	2	1	3	0	0	0	0	0	0	0	0	0	0	0	0	0	3	2	3	4
19	3	2	4	2	4	4	4	3	2	3	2	3	4	3	4	4	4	3	4	0	0	0	0	0	0	0	0	0	0	0	0	0	3	3	1	3
24	1	4	4	3	4	4	4	4	4	4	3	4	4	3	4	4	4	4	4	0	0	1	1	0	1	0	0	0	0	0	0	0	4		2	1
23	2	1	1	0	2	1	1	2	0	1	1	0	1	2	1	1	0	0	1	0	0	0	0	0	0	0	0	0	0	0	0	0	2	2	1	2
26	4	2	2	2	4	2	2	2	3	2	1	2	2	2	1	1	2	3	4	0	0	0	0	0	0	0	0	0	0	0	0	0	3	4	2	2
24	4	4	4	3	4	4	4	4	4	4	3	4	4	4	4	4	3	4	4	0	0	0	0	0	0	0	0	0	0	0	0	0	3	4	2	2
16	4	4	4	4	4	4	4	4	4	4	2	3	4	4	4	4	4	4	4	1	1	2	0	0	0	0	1	0	0	0	0	0	3	1	1	2
21	4	4	4	4	4	3	4	4	4	3	4	4	4	4	3	4	4	4	4	0	0	0	0	0	0	0	0	0	0	0	0	0	3	2	2	2
37	4	4	4	4	4	4	3	4	4	4	4	4	4	4	4	4	4	4	4	0	0	0	0	0	0	0	0	0	0	0	0	0	3	2	3	4
30	4	4	4	4	4	4	3	4	4	4	4	3	3	4	4	3	4	3	4	0	0	0	0	0	0	0	0	0	0	0	0	0	4	3	2	2
27	3	3	3	3	3	3	3	3	3	3	3	3	3	3	3	3	3	3	3	2	0	0	0	0	0	0	0	0	0	0	0	0	4	5	3	4
20	0	0	0	0	4	4	1	1	4	4	0	0	1	0	0	1	2	1	4	3	3	2	0	0	0	0	0	0	0	0	0	0	1	1	1	2
30	2	2	2	2	2	3	2	3	3	3	2	2	2	2	3	2	3	3	3	1	1	0	0	0	0	0	0	0	1	0	0	0	4	2	2	2
29	4	4	4	4	4	4	2	4	4	4	4	4	4	4	4	4	4	4	4	0	0	0	0	0	0	0	0	0	0	0	0	0	2	2	3	2
29	4	4	3	4	4	4	4	4	4	4	4	4	4	4	3	4	4	3	4	0	0	0	0	0	0	0	0	0	0	0	0	0	3	4	2	2
24	4	4	4	3	4	4	4	4	4	4	4	4	4	4	4	4	4	4	4	0	0	0	0	0	0	0	0	0	0	0	0	0	3	4	2	2
33	4	4	4	2	4	4	3	3	4	4	2	2	3	3	2	3	3	4	4	1	1	1	1	0	1	0	0	0	0	0	0	0	3	4	2	2
28	4	3	3	4	3	3	3	3	3	2	2	3	2	3	2	3	3	2	3	1	1	0	0	0	0	1	1	0	0	0	0	0	3	1	2	4
28	4	4	4	3	4	4	4	4	4	4	4	4	4	4	4	4	4	4	4	0	0	0	0	0	0	0	0	0	0	0	0	0	3	4	2	3
17	4	3	2	4	4	2	2	1	3	2	4	3	3	4	1	3	3	2	3	3	2	2	0	0	0	0	0	0	0	0	0	0	3	2	2	3
27	0	4	4	4	4	4	4	4	4	4	4	4	4	4	4	4	4	4	4	0	0	0	0	0	0	0	0	0	0	0	0	0	2	3	3	2
