# Supplementary material for: Effects of Socioeconomic Status and Social Support on Violence against Pregnant Women: A Structural Equation Modeling Analysis
Source: PLoS One. 2017 Jan 20;12(1):e0170469. doi: 10.1371/journal.pone.0170469 (PMC5249246; doi:10.1371/journal.pone.0170469)
Supplement: S2 File — (XLS) [file pone.0170469.s002.xls]

## Sheet: Sheet1
idadeg	m9tang	m10emo	m11inf	m12tang	m13effe	m14int	m15inf	m16emo	m17effe	m18int	m19tang	m20inf	m21int	m22tang	m23emo	m24inf	m25int	m26emo	m27effe	v1	v2	v3	v4	v5	v6	v7	v8	v9	v10	v11	v12	v13	edu	occu	class	inc
23	4	4	4	4	3	4	3	4	4	4	3	4	4	4	4	4	4	4	4	0	0	0	0	0	1	0	0	0	0	0	0	0	3	4	2
27	4	4	4	4	4	3	3	3	3	3	3	3	3	3	3	4	3	3	3	0	0	0	0	0	0	0	0	0	0	0	0	0	3	2	3	3
34	4	4	3	4	4	4	3	3	4	3	4	2	3	4	3	3	3	3	4	0	0	0	0	0	0	0	0	0	0	0	0	0	3	3	3	3
35	4	3	4	3	2	4	2	2	2	2	2	3	2	3	3	4	3	2	3	0	0	0	0	0	0	0	0	0	0	0	0	0	3	2	3	4
23	4	3	4	3	4	4	4	4	4	4	3	3	4	2	3	4	3	3	4	0	0	1	1	0	1	0	0	0	0	0	0	0	3	1	2	3
21	1	2	2	4	3	4	2	2	2	2	1	2	2	2	2	2	2	2	3	1	0	0	0	0	0	0	0	0	0	0	0	0	3	4	2	2
22	0	2	2	0	3	4	2	4	2	2	2	2	2	2	0	2	2	2	2	0	0	0	0	0	0	0	0	0	0	0	0	0	3	2	2	4
23		2	2	0	4	4	2	2	4	4	2	0	2	2	2	2	2	2	4	0	0	0	0	0	0	0	0	0	0	0	0	0	3	1	2	3
38	2	2	2	2	2		2	1	2	2		2	2	2	1	1	2	2	2	0	0	0	0	0	0	0	0	0	0	0	0	0	2	2	2
27	2	2	1	1	3	3	2	1	3	1	2	1	3	1	1	1	2	0	4	3	2	0	0	0	0	0	0	0	0	0	0	0	3	2	2	2
25	4	4	4	4	4	4	4	4	4	4	4	4	4	4	4	4	4	4	4	0	0	0	0	0	0	0	0	0	0	0	0	0	3		2	2
30	1	1	1	2	4	3	2	2	1	1	1	1	2	1	1	1	2	2	3	1	0	0	0	0	0	0	0	0	0	0	0	0	3	1	2	2
25	0	0	1	1	4	4	3	4	4	4	0	3	4	2	2	4	4	4	4	0	0	0	0	0	0	0	0	0	0	0	0	0	3	2	3	3
18	2	3	4	1	4	4	3	3	4	1	4	3	4	4	4	3	3	4	4	0	0	0	0	0	0	0	0	0	0	0	0	0	2	1	2
20	0	2	2	0	4	3	1	3	4	2	2	3	1	0	3	1	2	1	4	0	0	0	0	0	0	0	0	0	0	0	0	0	3	2	1	2
39	4	2	2	2	4	2	2	2	2	2	1	2	2	1	2	2	2	2	4	0	0	0	0	0	0	0	0	0	0	0	0	0	3	6	3	4
43	3	3	1	1	4	3	1	3	3	3	3	3	2	3			1	1	2	3	0	0	0	0	1	0	0	0	0	0	0	0	2	1	1	2
19	3	4	3	1	1	4	1	3	1	1	2	1	0	2	2	1	1	1	1	2	1	0	0	0	0	0	0	0	0	0	0	0	3	2	3	4
21	4	4	4	4	4	4	4	4	4	4	4	4	4	4	4	4	4	4	4	0	0	0	0	0	0	0	0	0	0	0	0	0	1	2	2	3
39	1	1	1	2	1	3	2	3	2	1	1	1	2	1	1	1	2	2	2	0	0	0	0	0	0	0	0	0	0	0	0	0	3	5	3	2
38	2	2	2	3	2	2	2	2	2	1	2	2	1	2	1	2	1	1	1	1	1	1	1	0	0	0	0	0	0	1	0	0	2	2	2	2
38	0	1	1			1	2	0	3	3	2	2	1	4	4	2	2	2	4	0	0	0	0	0	0	0	0	0	0	0	0	0	1	1	2	2
36	0	3	2	2	4	2	3	1	4	4	4	2	3	4	3	2	3	1	4	0	0	0	0	0	0	0	0	0	0	0	0	0	2	2	2	2
19	1	2	4	4	4	4	4	4	4	4	0	4	4	4	4	4	4	4	4	1	1	0	0	0	0	0	0	0	0	0	0	0	3	3	2	3
26	2	2	3	2	2	2	3	2	2	1	3	2	2	2	3	2	2	2	2	1	0	0	0	1	1	0	0	0	0	0	0	0	3	1	2	3
31	2	2	3	4	4	4	4	4	4	4	3	4	4	2	4	3	4	3	4	0	0	0	0	0	0	0	0	0	0	0	0	0	4	5	3	4
24	4	4	4	4	4	4	4	4	4	4	4	4	4	4	4	4	4	4	4	0	0	0	0	0	0	0	0	0	0	0	0	0	2	2	3	3
21	2	2	3	4	4	4	4	3	2	2	1	4	3	2	2	3	3	3	3	0	0	0	0	0	0	0	0	0	0	0	0	0	3	4	3
28	2	2	3	1	2	2	2	2	2	2	2	4	2	2	2	2	2	2	2	0	0	0	0	0	0	0	0	0	0	0	0	0	3	5	3	3
42	4	4	4	4	4	4	4	4	4	4	4	4	4	4	4	4	4	4	4	2	0	0	0	0	0	0	0	0	0	0	0	0	3	1	1	2
35	4	4	4	4	4	4	4	4	4	4	0	4	4	2	2	3	4	2	2	2	2	2	0	0	0	0	0	0	0	0	0	0	3	1	2	2
22	1	2	2	1	3	2	2	3	2	2	1	2	2	2	2	2	2	2	3	0	0	0	0	0	0	0	0	0	0	0	0	0	3	1	2	2
26	0	1	2	1	1	2	2	2	1	1	3	2	1	2	1	0	2	1	2	2	1	0	1	1	1	0	0	0	0	0	0	0	3	2	2	2
32	3	1	1	3	3	2	2	2	3	2	2	2	2	3	1	1	2	3	2	0	1	0	0	1	0	0	0	0	0	2	2	0	3	4	2	2
23	3	4	3	3	4	3	3	2	4	3	4	3	3	4	3	3	3	2	4	2	1	0	0	0	0	0	0	0	0	0	0	0	4		3	4
17	1	2	3	1	4	2	1	2	3	3	0	1	2	1	0	0	4	3	4	1	2	0	0	0	0	0	0	0	0	0	0	0	2	1	2	4
21	4	2	3	2	4	3	3	3	4	2	4	4	4	4	1	1	1	1	1	0	0	0	0	0	0	0	0	0	0	0	0	0	2	1	1	1
17	4	4	4	4	4	4	4	4	4	4	4	4	4	4	4	4	4	4	4	0	0	0	0	0	0	0	0	0	0	0	0	0	3	4	2
37	0	1	2	0	2	2	2	2	2	2	1	1	1	2	2	2	1	2	3	0	0	0	0	0	0	0	0	0	0	0	0	0	3	1	3	2
40	3	4	4	4	4	4	4	4	4	4	4	4	4	4	4	4	4	4	4	1	1	1		0	0	0	0	0	0	0	0	0	3	2	2
21	3	2	3	1	4	2	2	2	3	2	2	2	2	4	3	3	2	3	3	1	0	0	0	0	0	0	0	0	0	0	0	0	2	1	2	3
26	3	2	3	3	4	2	2	2	4	2	4	3	2	3	1	2	2	3	2	1	0	1	2	0	0	0	0	0	0	0	0	0	3	2	2	2
29	1	2	1	2	2	1	2	1	2	2	1	1	1	1	1	1	2	1	4	0	0	0	0	0	0	0	0	0	0	0	0	0	2	1	1	2
18	0	4	4	4	4	4	4	4	4	4	4	4	4	4	4	4	4	4	4	3	0	0	0	0	0	0	0	0	0	0	0	0	2	1	2	3
21	4	4	4	4	4	4	3	4	4	4	4	4	4	4	4	4	4	4	4	2	1	1	0	0	0	0	0	0	0	0	0	0	3	2	3	2
21	4	3	2	1	4	3	2	2	3	3	2	1	2	3	2	1	2	3	4	1	0	0	0	0	0	0	0	0	0	0	0	0	3	2	3	3
30	4	4	4	4	4	4	4	4	4	4	4	4	4	3	4	4	4	4	4	0	0	0	0	0	0	0	0	0	0	0	0	0	2	4	3	4
23	2	2	2	2	4	2	2	2	2	2	2	2	2	2	2	2	2	2	2	0	0	0	0	0	0	0	0	0	0	0	0	0	2	2	3	2
37	3	3	4	4	4	4	3	4	4	4	3	4	4	4	4	4	4	4	4	0	0	0	0	0	0	0	0	0	0	0	0	0	3	1	3	3
21	1	4	4	4	4	4	4	4	4	4	3	4	4	3	4	4	4	4	4	1	2	0	0	0	0	0	0	0	0	0	0	0	3	2	2	2
18	4	2	4	4	4	4	4	4	4	4	4	4	4	4	4	4	4	4	4	2	0	0	0	0	0	0	0	0	0	0	0	0	3	1	3	2
19	4	2	3	4	4	4	4	2	4	4	3	3	4	4	2	3	4	4	4	0	0	0	0	0	0	0	0	0	0	0	0	0	2	2	2	2
25	4	4	4	4	4	4	4	4	4	4	3	4	4	4	4	4	4	4	4	0	0	0	0	0	0	0	0	0	0	0	0	0		2	2	2
39	0	2	1	2	4	4	1	2	4	3	2	2	2	3	2	0	2	2	4	0	0	0	0	0	0	0	0	0	0	0	0	0	2	1	3	4
27	1	3	3	3	3	3	2	2	2	3	3	2	4	3	3	3	2	2	4	0	0	0	0	0	0	0	0	0	0	0	0	0	3	2	3	2
32	2	1	2	3	1	1	3	2	1	2	2	2	2	1	2	2	2	2	1	3	0	0	0	0	1	0	0	0	0	0	0	0	4	2	3	3
38	0	2	2	1	1	2	2	2	1	2	1	2	1	0	0	1	1	1	2	1	1	0	1	0	0	0	0	0	0	0	0	0	2	2	1	1
35	3	2	2	3	4	4	4	3	4	4	1	2	2	1	3	3	4	1	4	2	0	0	0	0	0	0	0	0	0	0	0	0	3	2	2	3
22	3	4	4	4	4	4	4	4	4	3	3	4	4	3	4	4	4	4	4	2	0	0	0	0	0	0	0	0	0	0	0	0	3	2	2	2
27	4	2	1	4	4	4	2	2	3	3	4	2	4	3	2	3	4	2	4	2	0	0	1	0	0	0	0		0	0	0	0	2	1	2	2
27	2	3	3	4	3	3	3	3	3	3	1	2	2	1	3	3	2	3	3	2	2	2	0	0	0	0	0	0	0	0	0	0	4	1	2	2
26	4	2	3	3	3	2	3	4	4	2	3	4	2	3	3	4	2	4	4	0	0	0	0	0	0	0	0	0	0	0	0	0	3	2	2	3
30	1	1	1	2	2	2	2	2	1	1	2	1	2	2	1	1	2	2	2	1	0	0	0	0	0	0	0	0	0	0	0	0	2	1	3	3
30	0	0	0	2	2	2	2	0	2	0	0	0	2	0	2	2	2	0	2	1	0	0	0	0	0	0	0	0	0	0	0	0	2	1	2	2
31	4	4	4	4	4	4	4	4	4	4	4	4	4	4	4	4	4	4	4	0	1	0	0	0	0	0	0	0	0	0	0	0	3	2	3	3
32	0	1	0	0	1	3	3	1	1	1	0	1	1	0	1	0	3	1	3	0	0	0	0	0	0	0	0	0	0	0	0	0	4	6	3	4
26	1	2	2	0	2	2	0	2	2	2	0	1	2	0	0	2	3	0	1	0	2	0	0	0	0	0	0	0	0	0	0	0	1	1	1	1
26	4	4	3	3	4	3	3	3	4	3	2	3	2	4	4	4	4	3	4	0	0	0	0	0	0	0	0	0	0	0	0	0	4		3	4
36	4	4	4	3	4	4	4	4	4	4	4	4	4	4	4	3	4	4	4	2	0	0	0	0	0	0	0	0	0	0	0	0	3	2	2	2
32	1	2	3	2	2	2	2	2	3	3	1	2	2	1	1	2	2	2	3	0	0	0	0	0	0	0	0	0	0	0	0	0	2	2	2	3
28	4	4	4	0	4	2	4	4	2	0	0	4	4	4	4	4	4	4	4	3	3	3	3	3	3	0	0	0	0	0	0	0	3		2	1
19	1	3	2	4	4	4	2	4	4	4	4	3	4	4	4	4	4	4	4	1	1	1	0	0	0	0	0	0	0	0	0	0	3	4	2	2
29	4	4	4	4	4	4	4	4	4	4	4	4	4	4	4	4	4	4	4	0	0	0	0	0	0	0	0	0	0	0	0	0	2	2	2	2
25	4	3	0	4	4	0	0	0	4	0	0	4	4	4	0	0	0	0	0	3	0	0	1	0	0	0	0	0	0	0	0	0	1	2	1	1
15	4	4	4	4	4	4	4	4	4	4	4	4	3	4	4	4	4	4	4	0	0	0	1	0	0	0	0	0	0	2	0	0	2	1	3	4
23	3	3	3	3	4	2	3	3	3	3	3	3	3	3	2	3	2	2	2	0	0	0	0	0	0	0	0	0	0	0	0	0	3	1	2	2
26	4	4	4	4	4	4	4	4	4	4	4	4	4	4	4	4	4	4	4	0	0	0	0	0	0	0	0	0	0	0	0	0	3	1	2	3
27	4	4	4	4	4	4	4	4	4	4	4	4	4	4	4	4	4	4	4	0	0	0	0	0	0	0	0	0	0	0	0	0	3	2	2	3
17	1	2	3	4	4	3	2	1	4	4	3	2	4	4	4	3	4	4	4	2	0	0	0	0	0	0	0	0	0	0	0	0	3	3	3	4
31	4	4	4	4	4	4	4	4	4	4	4	4	4	4	4	4	4	4	4	0	0	0	0	0	0	0	0	0	0	0	0	0	3	2	2	3
26	4	4	4	4	4	4	4	3	4	4	3	4	4	4	4	4	4	4	4	0	2	1	0	0	0	0	0	0	0	0	0	0	3	4	2	2
18	3	3	4	2	4	4	3	4	4	4	4	4	4	4	4	4	4	4	4	0	0	0	0	0	0	0	0	0	0	0	0	0	3	2	2
21	3	3	3	2	4	4	3	4	4	3	4	2	3	4	3	3	3	3	4	1	0	0	0	0	0	0	0	0	0	0	0	0	3	2	3	3
28	2	4	4	4	4	4	4	4	4	4	4	4	4	4	1	4	4	2	4	0	0	0	0	0	0	0	0	0	0	0	0	0	3	1	3	2
27	2	3	4	4	4	3	3	3	4	4	4	3	3	3	3	3	3	3	4	0	2	0	1	0	0	0	0	0	0	0	0	0	3	2	2	2
16	3	3	3	3	4	3	3	3	4	4	4	4	4	3	3	3	4	3	4	0	0	0	0	0	0	0	0	0	0	0	0	0	3	1	2	2
20	1	2	0	1	2	2	2	1	3	2	1	1	1	2	1	1	2	2	2	1	0	1	0	0	0	0	0	0	0	0	0	0	2	4	2	3
25	4	3	4	4	4	3	4	4	4	4	4	4	4	4	3	3	3		3	2	0	2	0	0	0	0	0	0	0	0	0	0	4	2	3	4
22	4	3	2	2	3	4	2	2	4	2	2	1	2	2	2	1	4	1	4	0	0	0	0	0	0	0	0	0	0	0	0	0	3	2	1	2
26	4	4	4	4	4	4	4	4	4	4	4	4	4	4	4	4	4	3	4	0	0	0	0	0	0	0	0	0	0	0	0	0		2	2	2
20	2	2	4	1	4	1	3	4	4	3	3	4	2	1	4	3	4	2	4	0	0	0	0	0	0	1	0	0	0	0	0	0	3	2	2
25	4	4	4	4	4	3	4	4	4	3	4	4	4	4	4	4	4	4	4	0	0	0	0	0	0	0	0	0	0	0	0	0	3	3	3	2
17	4	4	4	4	4	4	4	4	4	4	4	4	4	4	4	4	4	4	4	0	0	0	0	0	0	0	0	0	0	0	0	0	3	2	2	3
24	2	4	3	4	4	4	4	4	4	4	2	3	4	2	3	3	4	4	4	0	0	0	0	0	0	0	0	0	0	0	0	0	2	2	2	4
21	4	3	4	3	4	1	3	2	1	1	0	4	1	1	0	0	2	1	3	0	0	0	0	0	0	0	0	0	0	0	0	0	2	1	1	2
30	4	2	2	3	4	2	2	3	3	4	4	3	3	4	3	2	1	4	4	0	0	0	0	0	0	0	0	0	0	0	0	0	2	2	2	2
19	3	3	1	4	4	1	1	2	4	1	4	3	3	4	3	3	2	3	3	0	0	0	0	0	0	0	0	0	0	0	0	0	2	1		2
27	2	1	2	2	3	3	2	0	0	1	2	2	2	0	0	0	2	0	2														2	1	2	1
31	1	2	1	1	2	2	1	1	0	1	1	1	0	1	1	1	1	0	0	1	0	0	0	0	0	0	0	0	0	0	0	0	3	2	2	3
30	3	3	4	4	4	4	4	4	4	4	4	4	4	4	4	4	4	4	4	0	0	0	0	0	0	0	0	0	0	0	0	0	2	1	1	2
36	3	2	1	1	4	4	4	3	4	3	4	2	2	2	3	2	3	3	4	0	0	0	0	0	0	0	0	0	0	0	0	0	2	1	2	3
21	4	4	3	4	4	4	2	4	4	2	4	4	4	4	4	2	4	4	4	1	0	0	0	0	0	0	0	0	0	0	0	0	3	2	3	3
15	0	1	2	0	2	2	1	2	4	1	1	2	1	1	1	2	1	0	4	1	3	1	1	0	0	0	0	0	0	0	0	0	1	1	2	2
31	4	4	4	4	4	4	4	4	4	4	4	4	4	4	4	4	4	4	4	2	1	2	0	0	1	0	0	0	0	0	0	0	2	1	1	2
24	4	4	4	4	4	4	4	4	4	4	4	4	4	4	4	4	4	4	4	0	1	0	0	0	0	0	0	0	0	0	0	0		1	3	4
26	1	2	2	2	2	2	2	2		2	3	2	1	2	2	2	2	2	2	3	3	2	1	1	1	0	0	0	0	0	0	0	1	1	2	1
27	2	2	3	1	2	2	2	2	3			3	2	2	2		2	2	3	2	2	0	0	0	2	0	0	1	0	0	1	0	3	2	2	3
26	4	4	4	4	4	4	4	4	4	4	4	4	4	4	4	4	4	4	4	0	0	0	0	0	0	0	0	0	0	0	0	0	3	2	2	3
26	3	2	2	4	3	3	2	3	3	3	4	4	3	4	4	3	4	3	3	0	0	0	0	0	0	0	0	0	0	0	0	0	3	1		2
16	1	4	4	3	4	4	3	4	4	4	3	4	4	3	3	3	4	4	4	0	0	1	0	0	0	0	0	0	0	0	0	0	3		2	3
21	3	3	4	2	3	3	4	3	1	2	4	2	4	3	1	4	3	3	3	0	0	0	0	0	0	0	0	0	0	0	0	0	3	1	3	4
33	4	4	4	4	4	4	4	4	4	4	4	4	4	4	3	3	3	4	4	0	0	0	0	0	0	0	0	0	0	0	0	0	3	2	3	3
31	4	4	4	4	3	2	3	4	1	2	4	4	2	4	3	4	3	3	2	1	2	0	0	0	0	0	0	0	0	0	0	0	2	1	2	2
16	1	4		4		4		4	4	2	4	2	4	4	4	3	4	4	4	0	0	0	0	0	0	0	0	0	0	0	0	0	2	3	1	2
36	1	1	2	2	2	2	2	1	2	2	2	2	2	2	1	1	2	2	3	0	0	0	0	0	0	0	0	0	0	0	0	0	4	2		4
35	4	4	3	4	4	4	4	4	4	4	3	3	3	3	3	3	4	4	4	3	0	0	0	0	0	0	0	0	0	0	0	0	3	4	3
20	4	3	4	4	4	3	3	3	3	2	4	2	3	4	2	2	3	2	3	0	0	0	0	0	0	0	0	0	0	0	0	0	3	2	3
22	1	1	1	2	1	1	1	1	1	1	1	1	1	1	1	1	1	1	1	2	2	0	0	0	0	0	0	0	0	0	0	0	2	1	3	4
33	4	4	4	4	4	4	4	4	4	4	4	4	4	4	4	4	4	4	4	2	0	0	0	0	0	0	0	0	0	0	0	0	3	2	2	4
19	4	4	4	4	4	4	4	4	4	4	3	4	4	3	4	4	4	4	4	0	0	0	0	0	0	0	0	0	0	0	0	0	3	2		2
26	0	0	0	2	2	0	0	0	0	0	0	0	0	0	0	0	0	0	0	0	0	0	0	0	0	0	0	0	0	0	0	0	3	2	2	1
22	1	4	1	1	1	4	3	4	2	1	4	1	2	2	4	1	2	2	4	0	0	0	0	0	0	0	0	0	0	0	0	0	3	1	2	1
25	2	2	2	1	2	3	2	2	2	1	4	4	1	4	4	4	1	2	4	2	0	1	1	1	1	0	0	0	0	0	0	0	2	1	2	2
36	1	2	1	1	2	2	1	2	2	2	1	1	1	2	2	2	2	3	2	0	0	0	0	0	0	0	0	0	0	0	0	0	2	1	2	2
27	4	4	2	2	2	2	2	2	2	2	4	2	2	4	2	2	2	1	4	3	3	0	0	0	0	0	0	0	0	0	0	0	3	1	2	3
21	4	4	4	4	4	4	4	4	4	4	4	4	4	4	4	4	4	4	4	0	0	0	0	0	0	0	0	0	0	0	0	0	3		2	2
27	4	4	4	4	4	4	4	4	4	3	4	4	4	4	4	4	4	2	4	0	0	1	0	0	0	0	0	0	0	0	0	0	3	1	2	1
21	0	2	3	2	3	2	2	1	2	2	2	2	2	3	3	2	2	2	2	0	0	0	0	0	0	0	0	0	0	0	0	0	2	1	2	2
26	3	3	3	3	4	3	2	3	4	3	3	3	3	3	3	3	3	3	4	0	0	0		0	0	0	0	0	0	0	0	0	3	1	3	4
27	2	1	2	1	4	4	4	4	4		4	4	4	4	4	3	4	4	4	0	1	0	0	0	0	0	0	0	0	0	0	0	3	2	2	2
29	0	2	0	2	4	4	3	2	4	2	2	2	2	2	2	2	4	3	4	0	0	0	0	0	0	0	0	0	0	0	0	0	3	2	3	3
33	4	4	4	4	4	4	4	4	4	4	4	4	4	4	4	4	4	4	4	0	0	0	0	0	0	0	0	0	0	0	0	0	3	1	2	2
20	1	1	3	1	4	3	2	0	3	4	1	1	2	2	1	1	3	3	4	0	0	0	0	0	0	0	0	0	0	0	0	0		4		3
26	4	4	4	4	4	4	4	4	4	4	4	4	4	4	4	4	4	4	4	0	0	0	0	0	0	0	0	0	0	0	0	0	4	6	3
36	3	3	2	3	4	3	3	3	3	3	3	3	2	3	3	3	3	3	3	0	0	0	0	0	0	0	0	0	0	0	0	0	3	4	3	4
20	4	3	4	4	4	4	3	4	3	3	4	3	3	4	3	2	4	4	4	0	0	0	0	0	0	0	0	0	0	0	0	0	3	2	3	2
27	4	0	0	4	4	4	4	4	4	4	4	0	4	4	4	4	4	4	4	0	0	0	0	0	0	0	0	0	0	0	0	0	1	2	2	2
25	0	1	2	2	4	4	4	1	4	4	2	1	4	4	3	3	4	4	4	0	0	0	0	0	0	0	0	0	0	0	0	0	3	2	2	3
22	4	4		4	4	4	4	4	4	4	4	4	4	4	4	4	4	4	4	0	0	0	0	0	0	0	0	0	0	0	0	0	3	4	2	3
24	2	1	1	2	1	2	1	1	1	1	4	1	3	1	0	2	2	2	2	1	0	2	0	0	0	0	0	0	0	0	0	0	4	2	2
31	4	4	4	4	4	4	4	4	4	4	4	4	4	4	4	4	4	4	4	0	0	0	0	0	0	0	0	0	0	0	0	0	2	1	1	2
27	2	4	3	4	3	3	3	3	3	3	4	3	3	1	2	2	3	2	3	0	0	0	0	0	0	0	0	0	0	0	0	0	3	2	3
32	4	2	2	2	4	2	2	3	4	3	4	4	3	4	4	2	2	3	4	1	0	0	0	0	0	0	0	0	0	0	0	0	3	2	3	3
33	1	1	1	1	2	1	2	2	1	1	4	4	4	4	2	2	2	2	4	3	3	2	0	0	0	0		0	0	0	0	0	3	2	2	2
26	2	2	2	1	4	4	3	4	4	4	4	4	4	4	4	4	4	4	4	1	0	0	0	0	0	0	0	0	0	0	0	0	2	1	1	2
31	0	2	1	0	1	0	2	1	1	0	0	2	0	0	2	2	2	2	2	2	0	0	0	0	0	0	0	0	0	0	0	0	3	2	3	4
19	2	3		1	3	3	3	3	3	3	3	3	2	2	2	3	3	3	3	2	2	2	0	1	0	0	0	0	0	0	0	0	2	2	2
26	4	4	4	4	4	3	3	3	3	1	3	3	1	1	1	1	4	2	4	0	0	0	0	0	0	0	0	0	0	0	0	0	3	2	2	2
20	4	4	4	4	4	4	4	4	4	4	4	4	4	3	4	4	4	2	4	0	0	0	0	0	0	0	0	0	0	0	0	0	3	1	2	3
25	2	3	3	1	3	3	1	3	3	1	4	1	3	2	2	2	2	1	2	0	0	0	0	0	0	0	0	0	0	0	0	0	3	1	1	2
36	3	3	3	4	4	3	3	4	3	3	3	3	2	3	3	3	3	3	4	0	0	0	0	0	0	0	0	0	0	0	0	0	4	5	3	4
37																																	2	1	3	2
30	1	3	0	4	4	4	2	2	4	4	4	3	3	3	0	1	1	0	4	0	0	0	0	0	0	0	0	0	0	0	0	0	3	2	2	2
29	1	2	2	2	2	2	2	1	2	1	1	1	1	0	0	1	1	1	1	3	1	2	0	0	0	0	0	0	0	0	0	0	3	4	3	4
32	3	2	3	3	3	3	3	3	3	3	2	2	2	3	2	2	3	3	3	0	0	0	0	0	0	0	0	0	0	0	0	0	3	2	2	3
26	4	4	4	4	4	4	4	4	4	4	4	4	4	4	4	4	4	4	4	0	0	0	0	0	0	0	0	0	0	0	0	0	3	2	2	3
36	3	0	3	3	3	3	3	1	1	0	3	1	3		3	3	1	3	3	2	0	0	0	0	0	0	0	0	0	0	0	0	2	1	1	2
31	2	2	2	3	2	1	2	2	2	1	2	2	2	2	2	2	1	1	2	3	2	2	2	2	0	0	0	0	0	0	2	1	3	4	2	1
30	2	2	3	2	2	2	3	2	3	2	0	3	2	0	0	2	2	2	3	0	0	1	1	0	0	0	0	0	0	0	0	0	1	1	1	2
16	4	4	3	4	3	3	4	4	4	4	3	3	3	4	4	4	4	4	4	0	0	0	0	0	0	0	0	0	0	0	0	0	2	1	2	2
31	0	2	2	1	4	4	2	1	4	4	3	2	2	2	2	1	2	3	4	0	0	0	1	0	0	0	0	0	0	0	0	0	2		2
24	2	3	2	3	3	4	4	3	4	3	4	4	4	4	4	4	4	3	4	3	3	3	0	0	0	0	0	0	0	0	0	0	3	3	2	4
25																																	3	1	2	2
22	3	3	3	4	4	4	1	3	4	3	4	4	4	4	3	3	4	4	4	0	0	0	0	0	0	0	0	0	0	0	0	0	3	2	3	3
38	4	4	4	4	4	4	4	4	4	3	3	3	3	4	4	4	4	4	4	0	0	0	0	0	0	0	0	0	0	0	0	0	3	4	2	3
37	1	1	1	2	2	2	2	2	2	2	2	2	2	2			1	1		0	0	0	0	0	0	0	0	0	0	0	0	0	3	2	1	3
25	2	2	2	2	3	2	1	2	2	2	0	2	2	0	1	1	2	1	4	0	0	0	0	0	0	0	0	0	0	0	0	0	2	1	1	3
24	3	3	2	3	4	3	3	3	3	2	4	3	4	3	2	2	3	3	4	2	1	0	0	0	0	0	0	0	0	0	0	0	3	3	3	3
29	4	4	4	4	4	4	4	4	4	4	4	4	4	4	4	4	4	4	4	0	0	0	0	0	0	0	0	0	0	0	0	0	4	5	3	4
27	2	3	3	2	4	4	4	4	4	4	4	4	4	4	4	4	4	4	4	0	0	0	0	0	0	0	0	0	0	0	0	0	4	2	3	3
26	2	4	4	4	4	4	4	4	4	4	4	4	4	4	4	4	4	4	4	0	0	0	0	0	0	0	0	0	0	0	0	0	3	2	3
17	2	2	0	2	4	3	2	2	3	2	2	2	2	2	1	1	2	2	2	0	0	0	0	0	0	0	0	0	0	0	0	0	2	1	1	2
20	0	2	2	2	2	2	2		2	2	2	2	2	2			4	4	4	0	0	0	0	0	0	0	0	0	0	0	0	0	2	1	2	1
35	2	4	4	2	2	0	4	4	0	1	1	4	0	2	0	2	3	0	0	3	3	3	3	3	3	0	0	0	1	0	0	0	3	2	2	3
28	0	3	3	1	3	2	2	3	3	3	2	2	2	2	3	2	3	2	3	0	0	0	0	0	0	0	0	0	0	0	0	0	4	4	3	3
41	3	3	3	3	4	4	3	4	3	3	3	3	3	3	3	3	3	3	3	1	0	0	0	0	0	0	0	0	0	0	0	0	4	2	2	2
32	4	3	4	2	4	1	2	3	3	2	4	4	3	3	4	3	2	2	1	3	2	0	1	0	0	0	0	0	0	0	0	0	3	4	2
26																																	3	3	2	2
34	2	2	2	2	2	2	2	2	2	2	1	2	2		2	2	2	2	2														2	3	3	4
19																																	3	2	3	4
25	3	3	4	4	4	4	4	4	4	4	4	4	4	4	4	4	4	4	4	0	0	0	0	0	0	0	0	0	0	0	0	0		2	2	4
20	4	3	4	4	4	4	4	4	4	4	4	4	4	4	4	4	4	4	4	0	0	0	0	1	0	0	0	0	0	0	0	0	3		2
34	3	4	4	3	4	4	4	4	4	4	4	4	4	4	4	4	4	4	4	0	0	0	0	0	0	0	0	0	0	0	0	0	3	3	3	3
26	2	2	2	2	2	1	2	2	1	2	2	2	1	2	2	2	1	2	2	0	0	0	0	0	0	0	0	0	0	0	0	0	2	3	3	2
22	4	3	3	4	4	4	3	4	4	4	4	3	3	4	4	4	4	3	4	0	0	0	0	0	0	0	0	0	0	0	0	0	3	2	2	2
23	4	4	4	4	4	4	4	4	4	4	4	4	4	4	4	4	4	4	4	0	0	0	0	0	0	0	0	0	0	0	0	0	3	1	2	2
28	3	0	4	4	4	4	2	1	4	4	3	4	3	1	1	2	4	4	4	0	0	0	0	0	0	0	0	0	0	0	0	0	4	2	3
37	4	4	4	4	4	4	4	4	4	4	4	4	4	4	4	4	4	4	4	0	0	0	0	0	0	0	0	0	0	0	0	0	2	4	2	2
23	4	4	4	4	4	4	4	4	4	4	4	4	4	4	4	4	4	4	4	0	0	0	0	0	0	0	0	0	0	0	0	0	2	1	2	2
29	4	4	4	4	4	4	4	4	4	4	4	4	4	4	4	4	4	4	4	0	0	0	0	0	0	0	0	0	0	0	0	0	3		2
29	4	3	3	4	4	4	3	4	4	4	4	4	4	3	4	4	4	4	4	2	0	0	0	0	0	0	0	0	0	0	0	0	4	4	2	3
25	0	3	4	1	4	4	4	4	4	4	4	2	4	4	4	4	4	4	4	0	0	0	0	0	0	0	0	0	0	0	0	0	3	2	3	3
28	1	1	2	3	4	4	4	2	4	4	4	2	4	2	2	3		4	4	0	0	0	0	0	0	0	0	0	0	0	0	0	3	2	2	2
34	2	2	2	1	3	3	3	3	3	3	2	2	3	3	3	3	3	3	3	2	1	0	0	0	0	0	0	0	0	0	0	0	2	2	2	3
30	3	2	2	2	3	2	3	2	3	1	1	2	2	2	1	2	2	2	3														2		2	2
26	1	1	0	2	2	3	2	1	2	1	2	1	1	1	1	1	2	1	2	0	0	0	0	0	0	0	0	0	0	0	0	0	3	2	2	2
28	2	3	4	4	3	2	3	3	4	2	2	2	3	3	2	3	2	2	2	2	2	2	0	0	0	0	0	0	0	0	0	0	2	2	2
27	3	3	3	2	4	3	3	3	3	3	3	3	3	3	3	3	3	3	3	2	0	0	0	0	0	0	0	0	0	0	0	0	4	4	3	4
22	3	4	3	0	4	4	4	4	4	2	2	4	4	3	4	4	4	4	4	2	1	0	0	0	0	0	0	0	0	0	0	0	2	2	2	2
29																																	2	2	2	3
27	4	4	4	4	4	4	4	4	4	4	3	4	4	4	4	4	4	4	4	0	0	2	0	0	0	0	0	0	0	0	0	0	3	3	3	3
30	0	2	2	3	3	4	2	2	2	3	4	0	2	3	0	0	2	0	2	0	0	1	0	0	0	0	0	0	0	0	0	0	3	2	3	2
26	2	1	1	3	2	2	3	0	2	0	0	0	2	1	0	1	2	0	1	3	2	2	0	0	0	0	0	0	0	0	0	0	3	4	2
25	2	3	2	1	1	2	2	2	3	1	0	1	2	1	1	2	1	2	2	2	2	1	1	1	2	1	0	0	0	0	0	0	3	2	1	2
20	2	3	4	3	4	4	3	4	4	4	4	1	4	2	2	2	4	3	4	0	0	1	0	0	0	0	0	0	0	0	0	0	2	2	2	2
25		2	2	0	1	1	1	1	1	1	1	2	2	1	2					1	1	1	0	0	0	0	0	0	0	0	0	0	3	1	1	2
21	4	4	4	4	3	3	3	4	2	2	4	4	4	4	3	4	4	4	4	2	0	0	0	1	0	0	0	0	0	0	0	0	3	1	3	2
35	0			1	4	2	4	2	4	3	2	1	4	2	2	1	3	2	4	0	0	0	0	0	0	0	0	0	0	0	0	0	3	2	2	2
29	0	1	0	0	1	2	1	0	0	0	2	1	1	0	1	0	0	1	2	0	1	0	0	0	1	0	0	0	0	0	0	0	2	1	2	2
20	1	3	3	2	3	1	3	3	3	2	1	2	2	3	3	4	2	3	3	0	0	0	0	0	0	0	0	0	0	0	0	0	3	2	2	2
21	2	3	3	3	4	2	2	1	4	2	2	1	1	1	1	2	1	1	4	3	3	2	0	0	0	0	0	0	0	0	0	0	3	1	2	2
24	2	2	2	2	4	3	3	3	4	3	2	2	3	4	3	3	3	2	2	0	0	0	0	0	0	0	0	0	0	0	0	0	3	1	2	3
27	0	2	4	4	4	4	4	4	4	4	4	4	4	4	4	4	4	4	4	0	0	0	0	0	0	0	0	0	0	0	0	0	2	2	3	2
25	3	3	3	2	3	3	3	3	3	3	3	3	3	3	3	3	3	3	3	0	0	0	0	0	0	0	0	0	0	0	0	0	3	1	2	2
18	1	3	4	2	3	4	2	2	3	2	1	3	4	1	2	2	2	2	3	2	0	0	0	0		0	0	0	0	0	0	0	2	2	2	2
34	1	1	1	4	4	4	4	4	3	4	2	2	3	3	3	2	2	2	3	0	3	0	0	0	0	0	0	0	0	0	0	0	3		3	4
31	1	1	0	1	2	2	2	1	1	0	1	1	2	2	1	1	2	2	2	0	0	0	0	0	0	0	0	0	0	0	0	0	3	2	3	3
20	4	3	4	4	4	4	4	4	4	4	4	4	4	4	4	3	4	4	4	0	0	0	0	0	0	0	0	0	0	0	0	0	3	2
16	2	1	3	2	4	1	1	4	4	1	2	4	1	1	4	2	4	2	4	2		0	0	0	0	0	0	0	0	0	0	0	2		1	1
33	2	2	2	2	2	2	2	2	1	1	2	1	1	1	1	1	1	1	2	3	3	3	2	2	2	0	0	0	0	0	0	0	3	1	2	2
25	1	3	3	0	4	1	1	3	2	0	1	1	2	0	1	3	1	1	4	2	0	2	2	2	2	0	0	0	0	0	0	0	3	1	1	3
29	0	1	2	0	2	0	2	1	1	0	0	1	0	0	0	1	1	1	1	3	2	0	1	0	0	0	0	0	0	0	0	0	3	4	2	2
31	4	4	4	4	4	4	4	4	4	4	3	4	3	3	3	4	4	4	4	0	0	0	0	0	0	0	0	0	0	0	0	0	3	1	2	2
34	1	1	1	1	2	2	2	1	2	2	2	2	2	2	1	1	2	2	2	0	0	1	0	0	0	0	0	0	0	0	0	0	2	4	3	4
16	0	2	2	1	3	2	1	2	2	2	0	1	2	1	1	2	3	1	3	0	0	0	0	0	0	0	0	0	0	0	0	0	3	1	2	2
23	4	2	3	4	4	2	2	1	2	1	4	2	2	4	2	3	2	1	4	1	0	0	0	0	0	0	0	0	0	0	0	0	2	6	3
19	4	3	4	4	4	4	4	4	4	4	4	4	4	4	4	4	4	4	4	0	0	0	0	0	0	0	0	0	0	0	0	0	3	2	2	3
34	4	2	2	1	4	4	2	2	1	2	3	2	2	4	4	4	4	2	4	2	0	2	0	0	0	0	0	0	0	0	0	0	4	5	3	3
40	1	2	2	1	3	2	2	2	3	2	1	3	2	1	2	1	2	2	4	0	0	0	0	0	0	0	0	0	0	0	0	0	3	2	3	3
25	4	4	4	4	4	4	4	4	4	4	4	4	4	4	4	4	4	4	4	0	0	0	0	0	0	0	0	0	0	0	0	0	3	2	2	2
38	1	2	2	3	4	1		2	1	3	1	2	1	2	1	2	1	2	2	0	0	0	0	0	0	0	0	0	0	0	0	0	2	2	3	4
27	4	4	3	1	4	4	3	4	4	4	4	4	4	3	4	3	4	3	4	2	2	0	0	0	1	0	0	0	0	0	0	0	3	2	2	4
23	4	4	4	4	4	4	4	4	4	4	4	4	4	4	4	4	4	3	4	0	0	0	0	0	0	0	0	0	0	0	0	0	3	2	3	4
34	4	4	4	4	4	4	4	4	4	4	4	4	4	4	4	4	4	4	4	0	0	0	0	0	0	0	0	0	0	0	0	0	3	2	2	3
27	1	0	1	1	3	3	3	1	2	2	1	1	2	1	1	1	2	1	3	2	0	0	0	0	0	0	0	0	0	0	0	0	3	2	3	2
24	2	2	2	2	2	2	2	2	2	2	2	2	2	2	2	2	2	2	2	0	0	0	0	0	0	0	0	0	0	0	0	0	3	5	3	2
32	0	2	2	1	2	1	2	2	2	2	1	2	2	0	1	2	2	2	2	0	0	0	0	0	0	0	0	0	0	0	0	0	3	2	2	2
23	2	4	4	4	4	3	3	1	4	4	4	4	4	4	4	4	4	4	4	0	0	0	0	0	0	0	0	0	0	0	0	0	3	2	2	2
20	2	2	2	2	3	3	3	3	3	4	2	3	3	2	2	3	3	3	3	0	0	0	0	0	0	0	0	0	0	0	0	0	3	2	2
21	4	2	2	4	2	2	2	1	2	2	2	2	1	1	1	2	2	1	2	1	1	1	0	1	0	0	0	0	0	0	0	0	3	5	3	4
22	4	4	4	4	4	4	4	4	4	3	3	3	4	4	3	4	4	2	4	1	0	0	0	0	0	0	0	0	0	0	0	0	3	1	2	2
16	0	1	3	2	2	2	1	1	4	3	2	2	2	1	3	3	3	1	2	3	2	2	0	0	2	2	1	0	0	0	0	0	2	2	3	3
25	1	2	2	1	2	4	2	3	2	2	1	2	2	2	2	2	4	3	4	0	0	1	0	0	0	0	0	0	0	0	0	0	4	2	3	4
19	4	4	4	4	4	4	4	4	4	4	4	4	4	4	4	4	4	4	4	1	0	0	0	0	0	0	0	0	0	0	0	0	3	2	2	4
26	0	3	4	1	3	3	4	4	4	4	3	4	4	1	4	4	3	4	4	3	3	3	0	1	0	1	0	0	0	0	0	0	3	1	2	3
27	0	3	3	2	1	2	1	1	3	1	4	4	3	4	1	2	4	4	1	0	0	0	0	0	0	0	0	0	0	0	0	0	3	1	1	1
23	1	1	0	0	2	2	1	0	2	1	0	0	1	0	0	0	2	1	1	0	0	1	0	0	0	0	0	0	0	0	0	0	3	3	2	2
23	4	4	4	4	4	4	4	4	4	4	4	4	4	4	4	4	4	4	4	0	0	0	0	0	0	0	0	0	0	0	0	0	3	1	2	2
28	4	4	1	2	2	1	1	2	2	0	4	2	2	4	4	4	3	2	4	0	0	0	0	0	0	0	0	0	0	0	0	0	2	2	3
26	4	3		4	4	2	2	4	3	3	4	4	3	4	4	4	4	4	3	0	0	0	0	0	0	0	0	0	0	0	0	0	3	2	2	3
28	4	3	2	3	4	3	2	2	4	4	4	3	4	3	2	2	3	2	4	0	0	2	0	0	0	0	0	0	0	0	0	0	3	2	2	1
22	0	0	0	1		1		1	0	2		2	1	2	1	1	0	1	1	0	1	0	0	0	1	0	0	2	0	0	0	0	3	1	2	2
27	3	3	3	3	3	3	3	3	3	3	3	3	3	2	3	3	3	3	3	0	0	0	0	0	0	0	0	0	0	0	0	0	3	2	3	4
17	0	0	1	0	4	4	4	2	4	4	1	2	3	1	4	2	4	4	4	2	0	1	0	0	0	0	0	0	0	0	0	0	3	1	1
21	2	3	4	4	4	4	3	4	4	4	4	3	4	2	3	3	4	4	4	2	0	0	0	0	0	0	0	0	0	0	0	0	3	6	3	3
23	1	4	4	1	4	2	2	2	4	2	2	2	2	1	2	1	2	2	1	2	0	0	1	0	0	0	0	0	0	0	0	0	3	1	1
43	0	0	1	1	2	2	1	2	2	1	0	1	2	2	1	1	2	1	2	0	0	0	0	0	0	0	0	0	0	0	0	0	3	6	3
16	1	3	3	4	4	4	3	4	4	4	4	4	4	4	4	3	4	3	4	0	0	0	0	0	0	0	0	0	0	0	0	0	3	2		3
26	4	4	4	4	4	4	3	2	4	4	4	4	4	4	4	4	4	3	4	0	0	0	0	0	0	0	0	0	0	0	0	0	3		2
17	1	2	1	4	2	0	1	2	1	2	1	1	0	1	0	2	2	1	0	0	0	0	0	0	0	0	0	0	0	0	0	0	3	1	1	2
18	4	4	4	4	4	4	4	4	4	4	4	4	4	4	4	4	4	4	4	3	2	0	0	1	0	0	0	0	0	0	0	0	3	2	2	2
26	2	3	2	2	3	4	3	4	4	4	2	2	3	1	4	2	0	2	4	0	0	0	0	0	0	0	0	0	0	0	0	0	3	2	2	3
19	0	1	0	4	4	4	2	1	4	2	0	1	2	1	1	1	2	1	4	0	0	0	0	0	0	0	0	0	0	0	0	0	3	2	2	4
18	4	4	4	3	4	4	4	4	4	4	4	4	4	4	4	4	4	4	4	0	0	0	0	0	0	0	0	0	0	0	0	0	3	2	2	4
36	2	3	2	1	2	2	3	2	2	2	2	3	2	2	1	1	2	1	1	1													3	2	3	4
19	3	2	2	4	3	3	3	3	3	3	4	3	3	4	3	3	3	3	3	2	0	1	2	0	0	0	0	0	0	0	0	0	3	6	3	4
36	0	0	0	0	3	3	3	3	4	4	4	4	4	4	4	4	4	4	4	0	0	0	0	0	0	0	0	0	0	0	0	0	3	2	1	3
33	4	3	4	3	3	3	4	3	3	3	2	4	3	4	3	4	3	4	4	0	0	0	0	0	0	0	0	0	0	0	0	0	3	1	2	2
31	2	3	1	2	3	3	3	2	3	3	3	2	2	2	2	2	2	2	2	0	0	0	0	0	0	0	0	0	0	0	0	0	4	2	3	4
15	1	3	2	4	4	4	3	2	4	2	4	3	1	4	2	0	2	2	4	1	0	0	0	0	0	0	0	0	0	0	0	0	2	2	2	3
16	4	4	2	4	2	4	2	2	2	2	0	2	0	2	4	0	2	2	2	0	0	0	0	0	1	0	0	0	1	0	0	1	2	2	2
23	0	1	1	0	4	4	0	1	1	4	0	2	1	4	4	4	4	4	4	0	0	0	0	0	0	0	0	0	0	0	0	0	2	2	2	2
18	2	2	2	1	3	1	1	0	1	1	0	1	2	2	2	2	1	2	2	0	0	0	0	0	0	0	0	0	0	0	0	0	2	1	1	2
16	1	2	1	2	4	4	3	1	4	2	1	1	2	1	3	1	3	4	4	3	1	0	0	0	0	0	0	0	0	0	0	0	3	4	2	2
23	4	4	4	4	4	4	4	4	4	3	3	3	3	4	4	4	4	4	4	0	0	0	0	0	0	0	0	0	0	0	0	0	2	1	2	3
20	2	4	2	2	2	2	2	3	2	2	2	3	3	2	2	2	2	2	3	0	0	0	0	0	0	0	0	0	0	0	0	0	3	2		4
23	0	2	3	1	4	3	3	3	3	2	2	2	2	2	3	2	2	2	3	3	3	3	3	3	2	3	3	0	0	0	0	0	3	1	2	1
28	2	3	3	3	3	2	4	2	2	3	1	3	2	3	1	3	3	2	3	0	0	0	0	0	0	0	0	0	0	0	0	0	3	2	2	2
20	1	2	1	2	1	3	1	3	2	2	2	3	3	2	2	3	2	2	2	2	1	1	1	1	1	1	2	2	2	3	2	3	3	1	2	1
22	4	1	2	1	3	3	1	1	3	2	2	2	3	4	1	0	1	1	3	2	0	0	0	0	0	0	0	0	0	0	0	0	3	3	3	4
32	3	3	3	3	4	4	4	4	4	4	3	4	4	3	4	4	4	4	4	0	0	0	0	0	0	0	0	0	0	0	0	0	3	2	2	3
34	3	3	3	4	4	4	4	4	4	4	4	3	4	4	4	4	4	4	4	0	0	2	0	0	0	0	0	0	0	0	0	0	4	6	3	4
14	4	4	4	4	4	4	4	4	4	4	4	4	4	4	4	4	4	4	4	0	0	0	0	0	0	0	0	0	0	0	0	0	2	1	2	2
36	3	3	3	4	4	4	4	4	4	4	3	4	4	4	4	4	4	4	4	0	0	0	0	0	0	0	0	0	0	0	0	0	2	1	2	2
26	1	4	4	4	4	4	3	3	4	4	3	4	4	3	4	4	4	4	4	0	0	0	0	0	0	0	0	0	0	0	0	0	3	4	2	2
25	4	4	4	4	4	4	3	4	4	4	4	4	4	4	4	4	4	4	4	0	0	0	0	0	0	0	0	0	0	0	0	0	3	1	2	3
15																																	3	1	2	2
24	2	0	0	0	1	0	1	1	1	0	2	1	1	2	0	0	1	1	1	1	1	2	0	2	2	1	1	0	0	0	0	0	3	2	1	2
31	1	2	1	1	2	2	1	1	1	2	2		1	1	1	1	3	1	4	0	0	0	0	0	0	0	0	0	0	0	0	0	3	4	2	3
41	1	3	1	3	4	3	3	2	4	2	0	3	2	2	2	2	2	2	3	1	1	0	0	0	0	0	0	0	0	0	0	0	1
20	0	1	4	0	4	4	2	3	4	4	4	4	4	4	4	4	4	4	4	0	0	0	0	0	0	0	0	0	0	0	0	0	2	1	2	3
28	0	1	1	1	2	0	1	0	2	2	4	2	2	0	1	2	0	1	4	3	1	3	0	0	0	0	0	0	0	0	0	0	3	3	2	3
27	2	2	2	3	3	4	4	4	3	3	0	4	3	3	4	0	3	4	4	0	0	0	0	0	0	0	0	0	0	0	0	0	3	2	2	4
22	2	2	2	1	3	1	1	2	3	1	1	1	2	1	1	1	1	1	2	0	0	0	0	0	0	0	0	0	0	0	0	0	3	4	1	2
25																																	3		2	1
42	3	3	2	0	3	3	2	2	3	1	1	2	1	2	1	1	2	1	2	0	0	0	0	0	0	0	0	0	0	0	0	0	2	1	2	3
20	0	2	1	0	2	1	1	1	2	1	0	1	1	0	1	1	1	1	1	0	0	0	0	0	0	0	0	0	0	0	0	0	3	1	2	2
14																																	2	1	2	2
24	1	2	2	1	2	4	2	2	2	2	1	2	2	1	2	2	2	1	2	1	1	0	0	0	0	0	0	0	0	0	0	0	3	4	2	2
18	4	4	4	3	4	2	4	4	4	4	4	4	4	4	4	4	4	4	4	0	0	0	0	0	0	0	0	0	0	0	0	0	3
39	0	2		2		2	0			0			1		0		0	2	1	0		0	0	0		0		0	0	0	0		1	1	2	2
16																																	3	1	2
23	0	2	2	2	2	2	2	4	4	0	0	2	2	0	4	4	4	4	4	3	0	2	0	0	0	0	0	0	0	0	0	0	3	1	2	2
30	3	1	1	2	2	2	1	1	3	2	1	2	1	1	1	1	2	3	3	1	0	0	0	0	0	0	0	0	0	0	0	0	4	4	2	3
28	2	3	2	4	2	2	2	2	2	2	1	1	3	1	1	1	3	2	2	3	0	1	1	1	0	1	0	0	0	0	0	0	4	3	2	3
21	4	3	4	4	4	4	4	3	4	4	3	4	4	3	3	4	4	4	4	1	0	0	0	0	1	0	0	0	0	0	0	0	3	2	2	3
30	4	3	4	4	4	4	4	4	4	4	4	4	4	4	4	4	4	3	4	0	0	0	0	0	0	0	0	0	0	0	0	0	3	1	2	2
40	1	1	1	1	2	4	1	1	4	4	3	4	1	4	1	4	4	3	4	0	0	0	0	0	0	0	0	0	0	0	0	0	3	1	2	3
25	2	2	3	4	4	4	3	4	4	4	4	4	4	4	4	4	4	4	4	0	0	0	0	0	0	0	0	0	0	0	0	0	3	2	2	2
27	1	2	2	3	2	3	2	2	2	2	3	2	2	2	2	2	2	2	2	0	0	0	0	0	0	0	0	0	0	0	0	0	4	4	2	2
16	4	4	4	4	4	4	4	4	4	4	4	4	4	4	4	4	4	4	4	0	0	0	0	0	0	0	0	0	0	0	0	0	2	1	2	2
37	3	3	4	4	4	3	3	2	4	3	3	3	2	3	2	3	3	2	3	2	0	0	0	0	0	0	0	0	0	0	0	0	2	2	2	3
25	4	4	4	2	4	3	3	3	3	4	2	3	2	3	3	2	4	3	4	0	0	0	0	0	0	0	0	0	0	0	0	0	3	2	2	3
19	0	0	0	2	4	4	3	4	4	4	1	4	4	3	4	4	4	4	4	0	0	0	0	0	0	0	0	0	0	0	0	0	3	1	2	3
31	3	3	4	3	3	3	4	3	2	3	2	3	3	2	2	3	3	2	4	2	0	0	0	0	0	0	0	0	0	0	0	0	3	4	2	3
23	1	4	4	4	4	4	4	4	4	4	4	4	4	1	4	4	4	4	4	0	0	0	0	0	0	0	0	0	0	0	0	0	2	2	1	2
19	2	2	2	2	2	2	2	2	2	2	2	2	2	2	2	2	2	2	2	1	1	1	0	0	0	0	0	0	0	0	0	0	3	3	2	2
24	1	3	3	4	4	4	4	4	4	4	4	4	4	4	4	4	4	3	4	0	1	1	1	0	0	0	0	0	0	0	0	0	3	2	2	3
30	4	4	4	4	4	4	4	4	4	4	4	4	4	4	4	4	4	4	4	1	0	0	0	0	0	0	0	0	0	0	0	0	4	4	3	4
20	4	2	3	4	4	4	4	2	4	4	2	3	3	3	4	4	4	4	4	1	0	0	0	0	0	0	0	0	0	0	0	0	3	2	2	2
16	0	3	3	0	0	2	2	3	1	1	0	3	3	0	0	1	3	4	4	0	0	0	0	0	0	0	0	0	0	0	0	0	3	1	2	4
31																																	3	4	3	3
23																																	3	4	2	1
17	0	3	1	1	2	1	1	1	1	1	1	1	1	1	1	1	1	1	1	1	0	0	0	0	0	0	0	0	0	0	0	0	3	1	2	4
17																																	2	1	2	1
31	4	4	3	1	4	4	3	3	4	4	4	3	3	4	3	3	3	3	4	0	0	0	0	0	0	0	0	0	0	0	0	0	4	3	2	4
17	0	0	2	1	2	4	0	2	2	1	4	1	3	3	3	1	2	2	4	0	0	0	0	0	0	0	0	0	0	0	0	0		1	1	2
29	2	0	0	0	3	4	1	1	1	0	1	0	1	2	0	0	1	0	4	0	0	0	0	0	0	0	0	0	0	0	0	0	2	1	1	2
36	4	4	4	4	4	4	4	4	4	4	4	4	4	4	4	4	4	4	4	0	0	0	0	0	0	0	0	0	0	0	0	0	3	1	2	3
26	2	2	2	3	4	4	2	2	4	2	4	2	4	4	2	2	2	2	4														2	1	2	3
24	1	1	1	1	2	2	2	1	1	2	2	2	1	1	2	2	1	1	2	0	0	0	0	0	0	0	0	0	0	0	0	0	3	2	2	3
31	2	2	2	2	2	3	2	2	2	2	2	2	2	3	2	2	3	2	3	2	0	0	0	0	0	0	0	0	0	0	0	0	1	2	2	2
32	2	2	2	2	4	2	2	2	2	2	4	2	4	2	2	2	2	2	2	0	0	0	0	0	0	0	0	0	0	0	0	0	3	4	2	2
21	2	2	0	2	2	4	4	0	4	0	4	4	4	2	0	0	4	4	4	0	0	0	0	0	0	0	0	0	0	0	0	0	2	1	2	2
25	4	4	4	4	4	3	3	4	4	4	4	3	4	4	4	4	4	4	4	0	0	0	0	0	0	0	0	0	0	0	0	0	3	1	2	2
24	2	3	4	2	4	2	3	2	3	1	2	2	2	2	3	2	3	2	3	2	1	0	0	0	0	0	0	0	0	0	0	0	3	2	2	1
27	1	3	4	4	4	3	4	4	4	4	4	4	4	4	4	4	4	4	4	0	0	0	0	0	0	0	0	0	0	0	0	0	3	2	2	2
23	2	4	4	2	2	0	3	4	1	1	2	4	3	1	0	3	1	1	1	0	0	0	0	3	3	3	3	0	0	0	0	0	3		1	2
35	1	0	1	0	1	4	0	0	4	4	0	1	4	0	0	0	4	0	0	1	1	0	0	0	0	0	0	0	0	0	0	0	3	2	3	4
26	3	2	2	3	3	2	2	2	2	2	2	2	2	3	2	2	2	2	3	0	0	1	0	0	0	0	0	0	0	0	0	0	3	2	2	2
22	0	1	1	1	1	1	1	1	1	1	1	1	1	1	1	1	1	1	1	2	2	0	0	0	0	0	0	0	0	0	0	0	3	4	2	4
20	4	4	4	4	4	4	4	4	4	4	4	4	4	4	4	4	4	4	4	0	0	2	0	0	1	0	0	0	0	0	0	0	3	2	2	2
33	4	2	3	4	4	3	3	3	4	3	4	3	2	4	1	1	2	3	4	1	2	2	0	0	0	0	0	0	0	0	0	0	3	2	3	2
25	4	4	4	3	4	3	3	4	4	3	3	4	3	3	3	4	4	3	4	0	0	0	0	0	0	0	0	0	0	1	1	1	4	2	3	4
33	1	1	1	1	2	2		2		1	3	2	1	4	0	2	1	3	2	0	0	0	0	0	0	0	0	0	0	0	0	0	3	1	2	2
24	3	4	2	2	3	3	2	2	2	2	4	2	2	3	3	2	2	2	3	0	1	0	0	0	0	0	0	0	0	0	0	0	3		2	3
24	4	4	4	4	4	4	3	4	4	4	4	4	4	4	4	4	4	4	4	1	0	0	0	0	0	0	0	0	0	0	0	0	4	1	2	3
29	4	4	3	1	4	1	4	4	2	1	4	4	3	4	4	4	4	4	4	3	2	1	0	0	1	0	0	0	0	0	0	0	3	4	2	2
24	4	4	4	4	3	3	3	2	2	2	1	2	2	1	2	2	3	2	2	1	2	0	0	0	0	0	0	0	0	0	0	0	3	1	1	1
21	2	1	4	1	4	1	1	1	4	1	1	4	1	0	1	2	1	1	2	1	0	1	0	0	0	0	0	0	0	1	0	1	3	2	2	2
24	3	1	1	4	2	4	2	1	3	3	1	0	2	1	2	2	2	2	4	3	0	2	2	2	1	1	1	1	0	0	0	0	3	3	3	4
28	3	2	2	2	4	3	3	2	2	2	1	3	2	3	2	2	3	2	3	1	0	0	0	0	0	0	0	0	0	0	0	0	4	5	3	4
23	0	2	0	0	4	2	0	0	2	2	0	0	2	0	0	2	2	2	2	0	0	0	0	0	0	0	0	0	0	0	0	0	3	3	2	3
34	3	3	3	3	4	4	4	4	4	3	3	3	3	2	3	3	3	3	3	1	0	0	0	0	0	0	0	0	0	0	0	0	4	5	3	2
37	4	4	4	4	4	4	4	4	4	4	4	4	4	4	4	4	4	4	4	0	0	0	0	0	0	0	0	0	0	0	0	0	3	1	2	4
22	1	3	1	0	4	4	4	4	4	4	1	3	2	2	0	0	4	3	4	0	0	0	0	0	0	0	0	0	0	0	0	0	3	1	2	2
30	4	4	4	3	4	4	4	4	4	3	4	3	4	4	4	4	4	3	4	0	0	0	0	0	0	0	0	0	0	0	0	0	4	2	3	3
27	4	4	4		2	4	2	2	2	2	2	2	4	1	2	2	2	2	2	0	0	0	0	0	0	0	0	0	0	0	0	0	4	1	3	4
33	2	2	3	2	2	2	3	4	2	3	2	2	1	4	3	2	1	2	2	0	1	0	1	0	0	0	0	0	1	0	0	0	3	1	2	3
33	4	4	4	4	4	3	4	4	4	4	4	4	4	4	4	4	4	4	4	0	0	0	0	0	0	0	0	0	0	0	0	0	3	2	3	3
18	3	4	4	3	4	4	4	4	4	3	4	4	4	4	4	4	4	4	4	2	0	0	0	0	0	0	0	0	0	0	0	0	2	2	2	2
18	4	4	4	4	4	4	4	4	4	4	4	4	4	4	4	4	4	4	4	0	0	0	0	0	0	0	0	0	0	0	0	0	3	1	1	2
33	3	4	4	3	4	3	3	4	4	3	3	3	3	3	2	2	3	3	4	1	0	0	0	0	0	0	0	0	0	0	0	0	2	2	2	3
29	3	3	4	4	4	3	4	4	4	4	3	4	3	4	4	4	3	3	4	0	0	0	0	0	0	0	0	0	0	0	0	0	3	1	2	2
26	4	3	4	4	4	4	4	3	4	4	4	4	4	4	3	3	4	3	4	0	0	0	0	0	0	0	0	0	0	0	0	0	3	2	2	2
18	0	2	1	4	4	3	2	3	4	2	4	1	1	0	0	2	3	4	4	0	0	0	0	0	0	0	0	0	0	0	0	0	2	2	3	4
19	3	3	3	1	2	3	2	2	4	2	2	3	3	2	3	3	4	4	0	0	0	1	1	0	0	0	0	0	0	0	0	0	3	4	3	2
22	0	1	1	1	3	3	1	1	3	3	1	1	1	1	1	3	3	1	3	0	0	1	0	0	1	0	0	0	0	0	0	0	3	2	2	2
26	2	2	3	3	2	2	2	2	2	3	2	2	2	0	2	2		2	2	0	0	0	0	0	0	0	0	0	0	0	0	0	3	2		1
18	0	2	2	2	3	4	2	3	2	3	2	3	2	0	2	3	4	2	4	0	0	0	0	0	0	0	0	0	0	0	0	0	2	2	1	3
20	2	2	4	4	4	4	4	4	4	4	4	4	4	4	4	4	4	4	4	0	0	0	0	0	0	0	0	0	0	0	0	0	3	1		2
15	4	2	4	4	4	4	4	4	4	4	4	4	4	4	4	4	4	4	3	0	0	1	0	0	0	0	0	0	0	0	0	0	3	1		3
24	1	2	2	1	2	2	2	2	1	2	1	2	2	1	2	2	2	2	2	0	0	0	0	0	0	0	0	0	0	0	0	0	3	4	2	2
25	4	4	4	3	4	4	4	4	4	4	4	4	4	4	4	4	4	4	4	0	0	0	0	0	0	0	0	0	0	0	0	0	4	2	2	4
33	0	0	1	0	0	2	1	1	0	0	2	0	2	0	0	0	1	0	0	0	0	2	0	0	0	0	0	0	0	0	0	0	3	2	2	2
22	4	4	3	4	4	4	4	4	4	4	4	2	4	4	4	4	4	4	4	0	0	0	0	0	0	0	0	0	0	0	0	0	3	1	2	2
15	0	2	3	2	3	1	3	4	4	2	4	3	2	4	3	3	4	2	4	0	0	0	0	0	0	0	0	0	0	0	0	0	2	2	2	1
30	2	1	1	4	4	2	2	2	4	2	2	1	3	2	1	1	3	1	4	0	0	0	0	0	0	0	0	0	0	0	0	0	3	1	2	3
24	1	3	2	2	3	3	3	3	3	2	1	2	2	3	3	3	3	3	2	0	0	1	0	0	0	0	0	0	0	0	0	0	3	2	3	4
16	4	3	2	3	4	4	3	4	4	4	3	4	4	4	4	4	4	4	4	1	0	0	0	0	0	0	0	0	0	0	0	0	3	2
17	4	4	4	4	4	2	4	4	4	4	4	4	4	4	4	4	4	4	4	0	0	0	0	0	0	0	0	0	0	0	0	0	3	1	2	2
28	0	2	0	0	2	0	2	2	1	0	0	4	1	0	0	0	2	2	2	0	0	2	0	0	0	0	0	0	0	0	0	0	3	2	2	3
26	1	1	4	4	4	1	4	3	4	3	2	4	4	4	4	3	4	4	4	0	0	0	0	0	0	0	0	0	0	0	0	0	3	1	3	3
42	0	0	0	2	4	4	4	0	4	4	4	4	4	4	4	4	4	4	4	0	0	0	0	0	0	0	0	0	0	0	0	0	3	4	3	2
27	1	2	1	1	3	1	2	3	3	2	0	2	2	0	0	0	3	3	4	0	0	0	0	0	0	0	0	0	0	0	0	0	3	4	2	3
17	4	4	4	4	4	4	4	4	4	4	4	4	4	4	4	4	4	4	4	0	0	0	0	0	0	0	0	0	0	0	0	0	3	2	2
25	2	4	3	2	4	2	2	2	4	2	1	2	2	2	1	2	2	2	2	2	1	0	0	0	0	0	0	0	0	0	0	0	3	1		1
22	4	4	4	4	4	3	4	4	4	3	4	4	4	4	4	4	4	4	4	1	0	0	0	0	0	0	0	0	0	0	0	0	3	2	2	2
20	3	3	3	3	4	3	3	4	4	4	3	3	3	3	3	3	3	3	3	2	2	2	2	1	1	1	0	0	0	0	0	0	3	2	3	3
26	2	1	2	0	2	4	3	3	3	2	2	2	2	2	1	1	1	1	1	0	0	0	0	0	0	0	0	0	0	0	0	0	2	1	2	2
13	2	2	2	3	1	4	4	0	2	2	0	2	3	2	2	2	2	2	2	2	0	0	0		0	0	0	0	0	0	0	0	2	1	1	2
33	4	3	4	4	3	3	3	3	3	3	4	3	3	4	4	4	3	2	1	0	0	0	0	0	0	0	0	0	0	0	0	0	3	4	3	3
25	0	2	2	2	3	3	2	2	3	2	2	2	2		4	1	3	2	3	0	0	0	0	0	0	0	0	0	0	0	0	0	3	2	2	3
28	4	2	4	4	4	4	4	4	4	4	4	4	4	4	4	4	4	4	4	0	0	0	0	0	0	0	0	0	0	0	0	0	3	2	2	2
21	1	2	2	0	4	1	2	2	3	2	2	2	2	2	2	2	1	2	2	0	0	0	0	0	0	0	0	0	0	0	0	0	2	1	2	3
36	3	3	3	1	3	3	3	3	3	3	2	2	3	2	2	3	3	2	3	2	0	0	0	1	1	0	0	0	0	0	0	0	4	5	3	4
31	2	4	0	0	4	4	4	4	4	4	3	3	4	1	2	2	4	2	4	0	0	0	0	0	0	0	0	0	0	0	0	0	3	1	2	2
14	4	3	4	4	3	4	4	3	4	2	4	4	2	4	4	3	4	3	4	2	0	0	0	0	0	0	0	0	0	0	0	0	2	2	1	2
28	4	2	4	4	4	4	3	4	1	1	2	4	3	3	2	2	1	1	2	3	2	2	0	0	0	0	0	0	0	0	0	0	3	2		3
20	3	3	3	2	3	3	3	3	2	2	3	3	3	3	3	3	3	3	3	1	0	0	0	0	0	0	0	0	0	0	0	0	3	1	2	2
18	4	4	2	4	4	4	1	4	4	3	4		4	4	4	3	4	4	4	1	1	1	0	0	0	0	0	0	0	0	0	0	2	1		2
26	4	2	2	1	3	3	2	2	2	1	4	3	2	3	1	2	3	2	3	1	0	0	0	0	0	0	0	0	0	0	0	0	3	4	2	1
34	4	2	2	2	4	4	3	3	2	2	4	4	3	4	3	3	3	2	3	0	0	0	0	0	0	0	0	0	0	0	0	0	4	3	3
26	4	3	4	4	4	4	3	4	4	4	4	4	4	4	4	3	3	3	3	2	0	0	0	0	0	0	0	0	0	0	0	0	3	3	2	3
22	4	0	4	4	4	4	4	4	4	4	4	4	4	4	3	4	4	4	4	2	0	0	0	0	0	0	0	0	0	0	0	0	2	4		2
31	2	2	2	2	4	4	3	3	3	3	4	4	3	4	4	4	4	3	3	2	0	0	0	0	0	0	0	0	0	0	0	0	3	2	3	2
17	4	4	4	4	4	4	4	4	4	4	4	4	4	4	4	4	4	4	4	0	0	0	0	0	0	0	0	0	0	0	0	0	3	2	1	2
37	1	1	1	2	3	1	2	3	3	2	0	1	0	1	1	1	1	1	1	0	0	0	0	0	0	0	0	0	0	0	0	0	3	1	2
25	0		1	2	4	4	3	2	4	3	2	2	2	2	0	2	3	2	4	0	0	0	0	0	0	0	0	0	0	0	0	0	2	1	2	3
38	3	3	3	3	3	2	3	3	3	3	1	2	2	1	3	2	1	1	2	1		0	0	0	0	0	0	0	0	0	0	0	4	2	2	4
23	4	4	4	4	4	4	4	4	4	4	4	4	4	4	4	4	4	4	4	0	0	0	0	0	0	0	0	0	0	0	0	0	4	5	3	3
20	1	2	2	1	2	2	2	2	2	2	1	2	2	2	2	2	2	1	2	0	0	0	0	0	0	0	0	0	0	0	0	0	3	1	2	2
26	4	4	4	4	4	4	4	4	4	4	4	4	4	4	4	4	4	4	4	0	0	0	0	0	0	0	0	0	0	0	0	0	3	2		2
25	0	3	2	0	2	1	2	3	3	1	0	2	2	1	2	2	1	2	2	3	1	3	1	2	1	0	0	0	0	0	0	0	4	2	2	2
38	2	3	2	1	2	2	2	2	2	2	4	2	3	4	2	1	2	3	4	0	0	0	0	0	0	0	0	0	0	0	0	0		1	3	2
31	2	3	2	2	3	4	4	4	3	2	2	4	4	4	4	4	4	3	4	0	0	0	0	0	0	0	0	0	0	0	0	0	3	2	3
35	0	0	0	1	1	0	0	0	0	0	0	0	0	1	0	0	0	0	0	2	2	1	0	1	0	0	0	0	0	0	0	0	3	2	2	2
19	3	3	2	3	3	3	2	4	4	2	3	2	3	3	3	3	3	3	4	0	0	0	0	0	0	0	0	0	0	0	0	0	2	2	3	3
30	3	4	4	4	4	4	3	4	4	4	3	4	4	3	4	4	4	3	4	0	0	0	0	0	0	0	0	0	0	0	0	0	3	1	2	2
26	2	2	1	2	2	1	2	2	2	2	3	2	2	2	2	2	2	2	2	0	0	0	0	0	0	0	0	0	0	0	0	0	3	1	2	3
16	0	1	1	2	4	4	0	0	4	2	1	1	1	0	1	1	1	1	4	0	0	0	0	0	0	0	0	0	0	0	0	0	3	2	1	2
27	0	1	2	1	2	2	1	1	1	1	1	1	1	1	1	1	1	1	1	1	0	2	0	0	0	0	0	0	0	0	0	0	2	2	1	2
27	2	2	2	3	4	3	3	2	4	2	0	3	4	4	4	4	4	4	4	0	0	0	0	0	0	0	0	0	0	0	0	0		2	2	2
28	4	3	2	4	3	1	2	2	2	2	4	2	2	3	1	2	3	3	3	0	0	0	0	0	0	0	0	0	0	0	0	0	2	2		2
25	1	3	3	1	4	4	4	3	3	4	4	4	3	4	3	4	4	4	4	0	0	0	0	0	0	0	0	0	0	0	0	0	2	2		2
24	4	4	4	4	4	3	4	4	4	4	4	4	4	3	4	3	4	4	4	0	0	0	0	0	0	0	0	0	0	0	0	0	2	2		2
26	4	3	4	4	4	4	3	4	4	4	4	4	4	4	4	4	4	4	4	0	0	0	0	0	0	0	0	0	0	0	0	0	3	1	2	4
30	0	1	1	0	0	0	0	0	4	2	2	2	2	1	1	1	1	3	1	0	0	0	0	0	0	0	0	0	0	0	0	0	3	2	2
22	2	3	4	4	4	3	3	4	4	3	3	2	4	3	3	3	3	3	4	0	0	0	0	0	0	0	0	0	0	0	0	0	3	2	2	2
18	4	4	4	4	4	4	4	4	4	4	4	4	4	4	4	4	4	4	4	0	0	1	1	0	1	0	0	0	0	0	0	0			2	4
28	2	2	1	2	3	3	2	3	3	2	1	2	2	2	2	2	3	2	4	0	0	0	0	0	0	0	0	0	0	0	0	0	4	6	2	3
26	4	2	0	3	0	2	4	2	4	2	3	4	2	0	2	3	4	0	4	0	0	0	0	0	0	0	0	0	0	0	0	0	2	1	2	1
21	0	0	0	0	1	1	1	0	1	1	0	0	1	0	0	0	1	1	4	0	0	0	0	0	0	0	0	0	0	0	0	0	3	1		2
31	0	3	1	2	3	3	1	3	3		2	4	2	2	2	2	4	0	4	0	0	0	0	0	0	0	0	0	0	0	0	0	3	1	2	3
25	4	4	4	4	4	4	4	4	4	4	4	4	3	4	4	4	4	3	4	0	0	0	0	0	0	0	0	0	0	0	0	0	3	6	3	4
28	3	3	3	2	3	2	2	2	2	2	3	2	2	2	1	2	2	2	3	0	0	0	0	0	0	0	0	0	0	0	0	0	3	1	2	3
21	1	3	1	4	1	3	2	2	4	3	3	2	2	3	3	2	3	2	4	0	0	0	0	0	0	0	0	0	0	0	0	0	3	1	2	3
20	0	0	4	4	4	4	4	4	4	4	4	4	4	4	4	4	4	4	4	0	0	0	0	0	0	0	0	0	0	0	0	0	1		2
32	1	2	2	3	2	2	2	1	2	2	2	2	2	2	1	2	2	2	2	2	2	0	0	0	0	0	0	0	0	0	0	0	2	1	2	2
39	1	3	4	4	2	1	2	0	2	2	1	2	2	1	1	1	2	0	1	2	3	0	0	0	0	0	0	0	0	0	0	0	2	2
35	4	3	2	4	3	1	2	3	3	3	4	3	3	4	2	3	2	2	2	2	0	1	0	0	0	0	0	0	0	0	0	0	4	2	3	4
24	0	0	0	1	0	1	1	1	3	1	0	0	1	1	0	1	2	1	4	0	0	0	0	0	0	0	0	0	0	0	0	0	2	2	2	2
22	1	3	2	4	4	2	2	2	2	1	3	3	3	3	1	2	1	2	3	2	0	0	0	0	0	0	0	0	0	0	0	0	3	1	2	4
25	0	3	1	4	4	2	2	1	4	2	2	1	4	3	1	1	3	1	3	0	0	0	0	0	0	0	0	0	0	0	0	0	3	2	2	2
29	2	3	3	2	4	4	4	4	4	4	4	4	4	4	4	4	4	4	4	0	0	0	0	0	0	0	0	0	0	0	0	0	2	1	2	2
26	4	2	2	3	4	3	2	1	3	3	4	2	2	4	1	1	2	1	1	3	3	3	0	1	1	0	0	0	0	0	3	0	4	4	2	3
25	3	4	3	2	3	4	3	4	2	3	1	2	4	1	3	3	3	2	2	1	2	0	0	0	0	0	0	0	0	0	0	0	3	2	2	3
29	2	1	3	3	4	3	3	4	4	3	4	3	4	4	3	4	4	3	4	0	0	0	0	0	0	0	0	0	0	0	0	0	3	1	1	2
21	4	4	4	4	4	4	4	4	4	4	4	4	4	4	4	4	4	4	4	1	1	0	0	0	0	0	0	0	0	0	0	0	3		2	2
23	2	4	4	4	4	4	4	4	4	4	4	4	4	4	4	4	4	4	4	0	0	0	0	0	0	0	0	0	0	0	0	0	3	2	2	2
25	4	3	3	2	4	3	1	2	2	3	2	1	2	2	2	2	1	2	4	2	0	0	0	0	0	0	0	0	0	0	0	0	3	1	2	1
27	4	3	4	4	4	3	3	4	3	3	3	3	3	3	3	3	3	3	3	1	0	0	0	0	1	0	0	0	0	0	0	0	3	2	2	2
23	3	1	2	3	4	4	4	3	4	3	4	3	4	4	3	2	4	3	4	1	1	1	0	0	0	0	0	0	0	0	0	0	3	2	2	2
24	0		4	0		3	3	3	3	3	3	3	3	3	3	3	3	3	3	1	0	0	0	1	0	0	0	0	0	0	0	0	2	1	2	3
39	4	4	4	2	4	4	3	3	4	4	4	3	4	4	3	4	4	3	4	0	0	0	0	0	0	0	0	0	0	0	0	0	3	1	3	4
25	1	2	2	1	2	2	2	2	1	1	2	2	1	1	1	2	2	2	2	1	0	0	0	0	0	0	0	0	0	0	0	0	2	1	2	2
17	1	3	2	1	4	4	1	1	4	2	2	1	4	2	2	2	4	2	4	0	0	1	0	0	0	0	0	0	0	0	0	0	3	1	2	3
27	4	3	4	4	4	4	4	4	4	4	4	4	4	4	4	4	4	4	4	1	0	0	0	0	0	0	0	0	0	0	0	0	4	6	3	4
30	4	4	4	4	4	4	4	4	4	3	4	4	4	4	3	3	3	4	4	2	0	0	0	0	0	0	0	0	0	0	0	0	3		2	2
17	3	2	1	3	4	4	3	4	4	4	1	3	4	2	4	4	4	4	4	0	0	0	1	0	0	0	0	0	0	0	0	0	3	1
29	0	3	3	3	4	2	4	4	2	1	2	3	3	2	3	3		2	2	1	2	3	0	0	0	0	0	0	0	0	0	0	3	2	1	2
28	4	4	4	3	4	3	3	4	3	2	4	3	4	4	3	4	3	3	3	0	0	0	0	0	0	0	0	0	0	0	0	0	2	1	2	4
20	4	4	4	3	4	4	4	4	4	3	4	4	4	4	4	3	3	3	4	0	0	0	0	0	0	0	0	0	0	0	0	0	3	2
19	4	4	4	4	4	4	4	4	4	4	4	4	4	4	4	4	4	4	4		0	1	0	0	0	0	0	0	0	0	0	0	3		3
21	3	1	1	2		4	2	2	4	3	2	2	2	1	1	1	4	2	4	1	1	1	0	0	0	0	0	0	0	0	0	0	3	1	2	3
22	0	2	2	0	4	0	2	3	1	0	2	3	0	3	0	0	0	0	4	3	2	0	0	0	1	0	0	0	0	0	0	0	4	2	1	2
17	4	4	4	4	4	4	4	4	4	4	4	4	4	4	4	4	4	4	4	0	0	0	0	0	0	0	0	0	0	0	0	0	2	2	2	2
21	0	1	2	4	4	4	4	3	4	4	4	4	4	4	4	4	4	4	4	0	0	0	0	0	0	0	0	0	0	0	0	0	3	1	2	2
19	4	4	4	4	4	4	4	4	4	4	4	3	2	4	4	4	4	4	4	0	0	0	0	0	0	0	0	0	0	0	0	0	1	2	3	4
19	1	2	2	2	4	3	4	3	4	4	1	3	4	1	3	3	4	4	4	0	0	0	0	0	0	0	0	0	0	0	0	0	3	2	2	2
20	4	4	3	4	4	2	3	4	4	4	4	3	4	4	4	3	2	2	3	3	1	0	0	0	0	0	0	0	0	0	0	0	3	2	2	4
19	4	4	3	4	4	4	3	3	4	4	4	4	4	4	3	3	4	4	4	0	0	0	0	0	0	0	0	0	0	0	0	0	3	2	3	2
31	1	2	2	4	3	3	3	3	4	3	2	2	3	2	2	3	3	2	4	2	1	0	0	0	0	0	0	0	0	0	0	0	3	1	3	4
24	2	4	4	2	3	2	4	4	3	2	2	4	4	1	4	3	2	3	3	2	1	0	0	0	0	0	0	0	0	0	0	0	3	2	2	2
32	3	3	4	4	4	3	4	3	3	3	4	3	3	3	3	3	3	3	3	2	1	1	0	0	0	0	0	0	0	2	1	0	4	2	1	2
24	4	2	2	1	4	3	2	3	4	4	4	3	3	3	3	3	4	3	4	1	0	0	0	0	0	0	0	0	0	0	0	0	3	2	2	3
18	4	4	4	4	4	4	4	4	4	4	4	2	4	4	2	4	4	4	4	0	0	0	0	0	0	0	0	0	0	0	0	0	3	3	2	3
20																				0	0	0	0	0	0	0	0	0	0	0	0	0	3	1	3	2
29	1	4	4	1	4	4	4	4	4	4	1	4	4	1	4	4	4	4	4	0	0	0	0	0	0	0	0	0	0	0	0	0	2	3	2	4
20	4	4	3	1	4	4	3	4	3	2	1	2	2	1	2	1	1	2	3	0	0	0	0	0	0	0	0	0	0	0	0	0	3	1	1	3
23	3	2	1	2	3	3	2	1	1	1	1	1	2	2	1	1	2	2	3	2	0	2	2	2	2	0	1	0	0	0	0	0	3	1	2	2
36	2	2	3	0	1	3	2	1	3	3	3	3	3	4	3	4	3	2	3	0	0	0	0	0	0	0	0	0	0	0	0	0	3	1	2	3
35	4	2	3	1	4	1	3	4	4	4	4	3	4	4	4	3	3	3	4	1	0	0	0	0	0	0	0	0	0	0	0	0	2	1	2	2
18	4	2	2	2	3	3	3	3	3	3	2	3	3	3	2	3	4	3	4	0	0	0	0	0	0	0	0	0	0	0	0	0	3	2	3	3
27	0	2	2	2	4	2	2	2	2	0	2	2	2	2	1	2	2	2	4	1	1	1	0	0	0	0	0	0	0	0	0	0	2	2	2	2
23	2	2	2	2	3	2	2	2	1	2	2	2	2	3	2	2	2	2	3	2	0	0	0	0	0	0	0	0	0	0	0	0	3	2	2	2
24	2	4	2	4	4	2	2	2	3	2	2	2	2	2	2	2	4	2	4	0	0	0	0	0	0	0	0	0	0	0	0	0	3	1	2	2
17	1	4	2	2	3	3	2	4	4	2	2	2	3	1	2	2	2	2	3	0	0	0	0	0	0	0	0	0	0	0	0	0	3	2	2	2
27	1	1	2	1	2	1	1	2	1	1	2	2	1	1	1	1	1	1	1	2	2	2	2	2	2	2	1	0	2	2	2	0	2	2	2
35	4	2	2	4	3	2	4	2	1	1	0	1	1	2	1	1	2	1	2	0	0	0	0	0	0	0	0	0	0	0	0	0	3	4	2	2
18	2	3	3	3	3	3	1	4	3	1	2	4	1	1	1	3	1	3	2	3	1	0	0	1	1	0	0	0	0	0	0	0	3	2	2
20	4	4	4	4	4	3	4	4	4	3	3	4	3	4	4	3	3	3	4	1	0	0	0	0	0	0	0	0	0	0	0	0	3	1	3
27	3	3	3	2	4	3	3	4	4	3	2	3	2	3	3	3	3	3	4	0	0	0	0	0	0	0	0	0	0	0	0	0	3	2	2
42	3	4	4	4	4	4	4	4	4	4	4	3	4	4	4	4	4	4	4	0	0	0	0	0	0	0	0	0	0	0	0	0	3	2	2	3
26	0	0	0	2	0	2	0	0	0	0	0	0	0	0	0	1	1	0	0	0	0	0	0	0	0	0	0	0	0	0	0	0	2	2	2	1
22	1	2	2	2	3	4	3	1	3	3	1	1	3	1	4	4	4	3	4	2	0	1	0	0	0	0	0	0	0	0	0	0	3	2	3	2
27	0	1	0	0	0	0	1	1	0	1	2	0	1	0	0	0	0	0	1	2	2	0	0	0	0	0	0	0	0	0	0	0	3	2	2	2
35	1	0	0	0	1	0	0	0	1	1	1	1	1	1	1	0	0	1	1	1	0	0	0	1	1	0	0	0	0	0	0	0	2	4	3	4
29	0	2	2	3	4	2	2	1	4	3	1	4	3	2	2	2	2	2	4	0	0	0	0	0	0	0	0	0	0	0	0	0	3	1	2	3
22	3	3	3	3	4	3	3	3	3	3	2	3	3	3	2	3	3	3	3	0	0	0	0	0	0	0	0	0	0	0	0	0	3	1		3
23	3	3	4	4	4	4	3	4	4	4	1	4	4	3	4	4	4	4	4	0	0	0	0	0	0	0	0	0	0	0	0	0	3	2	2	3
19	4	4	4	4	4	4	4	4	4	4	4	4	4	4	4	4	4	4	4	1	0	2	0	0	0	0	0	0	0	0	0	0	3	2	2	2
26	2	2	3	2	3	3	3	3	2	2	4	2	2	2	1	2	2	2	2	1	2	0	0	0	0	0	0	0	0	0	0	0	4	4	3	4
29	4	4	3	4	4	4	4	4	4	4	4	2	4	4	4	3	3	3	4	3	3	3	0	0	0	0	0	0	0	0	0	0	3	4	2	2
37	2	4	3	3	4	4	4	4	4	4	3	2	4	3	4	4	4	4	4	0	0	0	0	0	0	0	0	0	0	0	0	0	2	2	3	4
20	4	4	3	0	2	0	0	0	0	0	0	0	0	0	0	0	0	0	0	0	0	0	0	0	0	0	0	0	0	0	0	0	3	1	2
22	2	1	1	2	3	1	1	1	2	1	2	2	1	2	1	2	1	1	4	0	0	0	0	0	0	0	0	0	0	0	0	0	3	2	2	2
22	1	3	2	3	4	4	2	2	4	2	4	1	2	3	4	4	4	3	4	0	0	0	0	0	0	0	0	0	0	0	0	0	3	2	2	3
27	2	4	4	4	4	4	4	4	4	4	4	4	4	4	4	4	4	4	4	0	0	0	0	0	0	0	0	0	0	0	0	0	3	1	2	4
33	2	2	2		1	2	3	1		1	3	2	2		1	2		0	0	1	2	2	2	2	1	0	0	0	0	0	0	0	2	2	2	4
25	4	4	4	4	4	1	3	4	4	2	4	4	4	4	3	4	4	2	3	0	0	0	0	0	0	0	0	0	0	0	0	0	2	1	1	2
25	0	4	2	0	0	4	0	2	0	4	0	2	4	2	1	1	4	2	2	0	0	0	0	0	0	0	0	0	0	0	0	0	3	3	3	3
29	2	2	3	3	3	4	2	3	4	2	4	2	4	2	2	2	4	3	4	2	0	0	0	0	0	0	0	0	0	0	0	0	2	1	2	2
21	4	4	4	4	4	3	4	4	4	4	4	4	4	4	4	4	4	4	4	0	0	0	0	0	0	0	0	0	0	0	0	0	3	2	2
29	3	3	3	3	3	3	3	3	3	3	3	3	3	4	4	4	4	4	4	0	0	0	0	0	0	0	0	0	0	0	0	0	2	2	3	4
35	3	3	3	4	4	4	3	4	4	4	4	3	3	4	3	4	4	3	4	0	0	0	0	0	0	1	0	0	0	0	0	0	4	2	3	4
23	4	4	4	4	4	4	4	4	4	4	3	3	3	3	4	4	4	3	4	1	0	0	1	0	0	0	0	0	0	0	0	0	3	3	2	2
17	0	3	2	0	3	3	2	2	3	4	0	4	3	0	0	2	4	3	4	0	0	1	1	0	0	0	0	0	0	0	0	0	2		2
24	4	4	4	4	4	4	4	4	4	4	4	4	4	4	4	4	4	4	4	0	0	0	0	0	0	0	0	0	0	0	0	0	3	2	2	2
27	0	2	2	2	2	2	2	2	2	0	2	0	0	0	0	0	0	0	0	0	0	0	0	0	0	0	0	0	0	0	0	0	3	2	2	3
30	4	3	3	4	4	4	4	4	4	4	3	4	4	3	3	3	3	4	4	0	0	0	0	0	0	0	0	0	0	0	0	0	3	3	2	3
25	1	2	1	1	2	1	2	1	2	1	1	2	2	1	1	1	2	1	2	1	0	0	0	0	0	0	0	0	0	0	0	0	2	1	2	3
23	4	4	4	4	4	4	4	4	4	4	3	4	3	3	3	4	4	3	4	0	0	0	0	0	0	0	0	0	0	0	0	0	3	2	2	3
31	0	0	1	3	0	1	0	1	0	0	0	0	0	1	1	1	1	2	2	0	0	0	0	0	0	0	0	0	0	0	0	0	2	1	3	3
28	4	2	2	4	4	2	2	3	3	3	2	2	2	4	2	2	2	2	3	1	0	0	0	0	0	0	0	0	0	0	0	0	3	2	2	2
20	4	4	4	3	4	3	3	4	4	4	3	3	4	3	2	3	4	2	4	2	1	2	2		0	0	0	0	0	0	0	0	3	2	3	3
28	2	3	3	1	2	1	2	2	2	2	2	2	3	2	3	2	2	2	2	3	3	2		2	2	2	1	0	0	0	0	0	3	2	2
24	4	4	4	4	4	3	4	4	4	4	4	4	4	4	4	4	4	4	4	0	0	0	0	0	0	0	0	0	0	0	0	0	3		2	4
26	1	3	1	1	3	1	1	2	1	1	1	1	2	1	1	1	2	1	1	2	1	0	2	1	0	0	0	0	0	0	0	0	3	2	2	3
27	0	0	1	1	2	2	2	2	3	2	2	2	2	2	2	2	2	2	2	0	0	0	0	0	0	0	0	0	0	0	0	0	3	2	2	2
22	2	3	4	3	4	4	3	4	4	4	4	4	4	3	2	2	2	2	3	0	0	0	0	0	0	0	0	0	0	0	0	0	3	1	3	2
20	2	1	2	2	3	3	3	3	4	2	1	2	2	1	2	2	2	1	3	0		1	1	0	1	1	0	0	0	0	0	0	3	2	3	4
26	2	4	3	2	4	2	3	3	4	1	1	2	1	4	1	1	1	2	3	0	0	0	0	0	0	0	0	0	0	0	0	0	3	2	3	2
20	3	4	3	4	4	4	3	4	4	4	4	4		3	4	4	4	3	4	0	0	0	0	0	0	0	0	0	0	0	0	0	3	2	1	2
22	1	2	2	4	4	4	0	0	0	0	0		0	0	0	0	0	0	0	0	0	0	0	0	0	0	0	0	0	0	0	0	3	2	3	2
27	2		1	1	3	1	1	1	2	1	1	1	2	1	1	1	1	1	3	0	0	0	0	0	0	0	0	0	0	0	0	0	3	2	2	3
25	1		1	1	4	4	3	4	2	4	2	3	3	2	4	4	4	2	4	1	0	0	0	0	0	0	0	0	0	0	0	0	2	2	2	2
28	4	3	4	1	4	0	2	4	1	1	1	2	0	3	1	2	0	1	1	3	0	1	0	0	0	0	0	0	0	0	0	0	2	1	3	2
28	2	1	2	3	4	4	3	1	2	2	0	1	1	1	1	1	2	2	1	0	0	0	0	0	0	0	0	0	0	0	0	0	3	1	2	2
34	0	2	2	0	2	4	2	2	2	2	2	2	2	2	2	2	4	2	4	1	0	1	0	0	0	0	0	0	0	0	0	0	3	2	2	4
30	4	4	4	4	4	4	4	4	4	4	4	4	4	4	4	4	4	4	4	1	1	1	0	0	0	0	0	0	0	0	0	0	3	2	3	3
32	2	4	4	3	4	4	4	4	4	4	3	4	4	3	4	4	4	4	4	0	0	0	0	0	0	0	0	0	0	0	0	0	3	2	2	3
32	3	3	3	2	3	3	3	3	3	3	2	3	3	3	3	3	4	3	4	0	1	0	0	0	0	0	0	0	0	0	0	0	3	6	3	4
29	4	2	2	4	2	2	2	2	0	2	4	2	2	4	1	2	2	1	2	2	0	0	0	0	0	0	0	0	0	0	0	0	4	5	3	4
24	2	4	2	4	3	4	2	2	4	4	0	1	3	4	3	2	3	4	4	3	3	1	1	0	1	0	0	0	0	0	0	0	3	1	2	2
34	1	1	2	2	3	2	3	3	3	2	3	2	2	2	2	2	2	3	4	0	0	0	0	0	0	0	0	0	0	0	0	0	3	4	2	2
24	4	1	2	4	4	3	2	2	4	2	4	0	2	4	2		4	4	3	0	0	0	0	0	0	0	0	0	0	0	0	0	3	2	2	2
18	4	4	4	4	4	4	4	4	4	4	3	4	4	3	4	4	4	4	4	0	0	0	0	0	0	0	0	0	0	0	0	0	3	4	2	2
42	2	4	4	0	3	2	1	3	2	2	1	1	1	3	1	1	2	2	2	1	1	0	0	0	0	0	0	0	0	0	0	0	1	1	2	2
23	4	4	4	4	4	4	4	4	4	4	3	4	4	4	4	4	4	4	4	0	0	0	0	0	0	0	0	0	0	0	0	0	3	2	3
25	0	1	4	0	4	1	4	4	1	0	3	3	1	3	4	4	4	3	4	0	1	0	1	0	0	0	0	0	0	0	0	0	3	2	2	3
15	4	1	2	4	4	3	3	3	3	3	3	3	3	4	3	3	3	2	4	1	0	0	0	0	1	0	0	0	0	0	0	0	3	2	3
39	3	4	4	4	4	4	3	4	4	4	1	2	4	2	4	4	4	4	4	0	0	0	0	0	0	0	0	0	0	0	0	0	3	2	2	2
24	4	3	4	4	4	4	3	4	4	4	4	2	3	4	4	4	4	4	4	0	0	0	0	0	0	0	0	0	0	0	0	0	2	2	3	2
29	2	2	2	2	2	1	2	1	1	1	3	1	1	2	1	2	2	1	1	0	1	1	0	0	0	0	0	0	0	0	0	0	3	1	2	3
16	4	3	3	2	2	3	2	2	2	2	3	3	3	3	2	2	3	2	2	2	2	1	1	0	0	0	0	0	0	0	0	0		1	1	1
33	0	3	3	3	4	3	4	4	4	4	3	4	3	3	3	3	3	3	4	0	0	0	0	0	0	0	0	0	0	0	0	0	2	1	2	2
19	3	4	3	4	4	3	3	4	3	1	4	4	2	2	4	4	4	4	4	0	0	0	0	0	0	0	0	0	0	0	0	0	3	2	2	3
23	3	3	2	1	1	3	2	4	1	2	1	2	2	1	4	3	2	3	3	0	0	0	0	0	0	0	0	0	0	0	0	0	3	4	2	2
36	2	4	4	4	4	2	4	4	4	2	2	3	4	2	4	2	4	2	2	2	0	0	0	0	0	0	0	0	0	0	0	0	2	1	2	3
28	2	2	0	2	1	1	2	2	1	2	0	1	2	0	3	2	1	2	4	1	0	0	0	0	0	0	0	0	0	0	0	0	3	2	3	4
31	4	4	4	3	4	4	4	4	4	4	3	4	4	4	4	4	4	4	4	2	2	0	0	0	0	0	0	0	0	0	0	0	4	3	3	4
32	1	1	1	2	2	1	1	2	1	0	1	1	0	2	1	0	2	2	1	0	0	0	0	0	0	0	0	0	0	0	0	0	3	1	2	2
19	4	4	4	4	4	4	4	4	4	4	4	4	4	3	4	4	4	4	4	0	2	0	0	0	0	0	0	0	0	0	0	0	3	2	2	2
28	0	0	0	1	1	2	1	1	2	1	1	1	2	1	1	1	2	2	2	0	0	0	0	0	0	0	0	0	0	0	0	0	2
21																																	3	3	3
26	1	3	3	1	4	3	3	4	4	4	2	2	3	2	3	2	3	3	4	0	0	0	0	0	0	0	0	0	0	0	0	0	3	1	3	4
21	3	3	3	3	3	2	3	3	2	2	1	2	1	1	3	3	1	2	3	1	0	0	0	0	0	0	0	0	0	0	0	0	3	2	3	4
23	4	4	4	4	3	3	3	3	2	2	1	1	3	0	2	3	2	2	2	1	0	0	0	0	0	0	0	0	0	0	0	0	3	2	2	2
28	3	3	4	2	4	4	3	2	4	3	4	3	4	4	3	3	4	3	3	0	1	0	1	0	0	0	0	0	0	0	0	0	3	5	2	2
28	4	4	4	3	4	4	3	4	4	4	4	4	4	4	4	4	4	4	4	0	0	0	0	0	0	0	0	0	0	0	0	0	3	1	2	3
25	1	2	1	4	1	4	2	2	4	3	4	3	2	3	1	3	3	3	3	0	0	0	0	0	0	0	0	0	0	0	0	0	3		2	3
22	4	3	4	4	4	3	3	4	4	3	4	4	4	4	4	4	1	2	4	0	0	0	0	0	0	0	0	0	0	0	0	0	3	2	2
17	4	4	4	4	4	4	4	4	4	4	4	4	4	4	4	4	4	4	4	0	0	2	0	0	0	0	0	0	0	0	0	0	3	1	3	3
38	4	4	4	0	4	4	4	4	4	2	2	4	2	4	4	4	4	2	4	0	0	0	0	0	0	0	0	0	0	0	0	0	3	1	2	2
30	4	4	4	4	4	4	4	4	4	4	4	4	4	4	4	4	4	4	4	0	0	0	0	0	0	0	0	0	0	0	0	0	3	1	2	2
32	4	4	3	4	4	4	4	3	4	3	4	3	4							0	0	0	0	0	0	0	0	0	0	0	0	0	3	5	3
29	4	4	4	4	4	3	4	4	4	4	4	4	4	4	4	4	4	4	4	0	0	0	0	0	0	0	0	0	0	0	0	0	3	2	2	3
36	4	4	4	4	4	4	4	4	4	4	4	4	4	4	4	4	4	4	4	0	0	0	0	0	0	0	0	0	0	0	0	0	4	3	3	4
31	1	1	2	3	2	1	1	1	0	1	1	1	2	3	0	0	2	0	3	0	0	0	0	0	0	0	0	0	0	0	0	0	2	1	1	2
24	4	4	4	4	4	4	4	4	4	4	4	1	1	4	2	2	4	4	4	1	1	2	1	0	0	0	0	0	0	0	0	0	3	1	2	2
25	4	4	3	4	4	4	3	4	4	4	4	4	4	4	4	4	4	3	4	1	0	0	0	0	0	0	0	0	0	0	0	0	3	2	2	2
21	2	4	4	2	4	4	4	4	4	4	3	4	4	4	4	4	4	4	4	3	2	2	2	0	0	0	0	0	0	0	0	0	2	1	2	1
23	0	2	1	2	2	2	2	2	2	2	1	2	2	1	2	1	2	2	3	0	0	0	0	0	0	0	0	0	0	0	0	0	3	2	2	2
31	3	3	3	3	4	3	2	2	3	3	2	3	3	3	3	3	3	3	3	0	0	0	0	0	0	0	0	0	0	0	0	0	3	2	1	3
15	2	3	4	3	4	4	4	4	4	3	3	3	3	3	3	3	4	3	3	1	0	0	0	0	0	0	0	0	0	0	0	0	2	2	2	2
36	4	4	3	4	4	4	3	4	4	3	4	3	3	4	4	4	4	3	4	0	0	0	0	0	0	0	0	0	0	0	0	0	3	2	3	2
27	1	2	2	3	2	2	2	2	2	2	2	2	2	2	2	2	3	2	3	1	1	0	1	0	0	0	0	0	0	0	0	0	3	2	3	3
33	2	4	4	3	4	3	4	4	4	2	3	4	2	3	3	4	4	3	2	2	1	2	1	1	0	0	0	0	0	0	0	0	3	2	2	2
19	4	4	4	4	4	4	4	4	4	4	4	1	4	4	4	4	4	4	4	0	0		0	0		0	0	0	0	0	0	0	2	2	2	2
20	4	3	4	4	4	4	4	4	4	4	4	4	4	4	4	4	4	4	4	3	0	2	0	2	2	0	0	0	0	0	0	0	4	2	3	2
24	4	4	4	3	4	4	3	4	4	4	4	4	3	4	4	4	3	4	4	0	0	0	0	0	0	0	0	0	0	0	0	0		2	3	2
28	4	3	3	3	4	3	3	3	4	3	4	4	3	4	3	3	3	3	4	0	0	0	0	0	0	0	0	0	0	0	0	0	4	5	3	4
23	4	3	3	4	4	4	3	3	2	2	4	2	3	4	3	3	3	3	2	0	0	1	0	0	0	0	0	0	0	0	0	0	3	2	2	3
26	3	2	1	0	1	0	1	0	0	1	3	0	0	3	1	1	1	1	0	0	0	0	0	0	0	0	0	0	0	2	0	0	4	3	2	2
29	4	4	4	4	4	4	4	4	4	4	4	4	4	4	4	4	4	4	4	0	0	0	0	0	0	0	0	0	0	0	0	0	4	5	3	4
26	1	1	1	1	1	1	1	1	1	2	1	1	1	1	0	0	1	0	2	0	0	0	0	0	0	0	0	0	0	0	0	0	2	1	1	2
33	3	1	1	2	4	3	1	3	4	4	3	2	3	1	0	2	4	3	4	3	2	0	0	0	0	0	0	0	0	0	0	0	3		2	3
24	2	3	2	2	3	3	2	3	2	3	2	2	2	2	3	2	2	2	3	0	0	0	0	0	0	0	0	0	0	0	0	0	4	3	3	2
20	3	2	2	2	3	2	1	2	2	2	2	1	2	2	1	1	2	1	2	2	0	3	1	0	0	0	0	0	0	0	0	0	3	4		3
23	0		2	2	4	3	4	4	3	2	2	2	3	2	1	4	2	1	2	1	1	0	0	0	0	0	0	0	0	0	0	0	3	1	2	2
31	2	2	2	2	2	2	2	2	2	2	2	2	2	2	2	2	2	2	2	0	0	0	0	0	0	0	0	0	0	0	0	0	2	2	1	2
26	4		4	4	4	4	4	4	4	4	4	4	4	4	4	4	4	4	4	0	0	0	0	0	0	0	0	0	0	0	0	0	2	1	2	3
38	3	2	3	4	4	4	3	3	4	3	4	2	3	4	2	3	2	2	4	1	0	0	0	0	0	0	0	0	0	0	0	0	2	2	2	4
18	0	0	0	2	4	3	2	1	4	2	2	4	1	0	2	2	3	2	4	0	0	1	0	0	0	0	0	0	0	0	0	0	2	2	1	2
29	3	2	1	1	2	3	2	1			1	2	3	1	2	2	2	2	2	0	0	0	0	0	0	0	0	0	0	0	0	0	3	1	3	3
29	1	2	2	3	3	2	2	3	2	2	2	2	2	2	1	2	2	2	3	2	1	0	1	0	0	0	0	0	0	0	0	0	3	3	2	4
32	1	2	1	2	2	2	2	2	1	2	0	1	2	1	2	1	2	2	2	1	0	1	0	0	0	0	0	0	0	0	0	0	3	1	3	2
27	1	2	2	4	2	4	2	2	4	2	1	2	2	0	2	2	4	2	3	2	0	0	0	0	0	0	0	0	0	0	0	0	4	5	3	4
37	4	3	1	4	4	4	4	3	2	3	4	3	3	2	1	2	2	3	4	2	3	0	0	0	0	0	0	0	0	0	0	0	3	2	2	2
22	1	1	2	1	1	2	2	1	1	0	3	2	2	2	1	2	2	1	2	1	2	0	0	0	0	0	0	0	0	0	0	0	2	1	2	2
16																																	3	1	3	4
30	2	2	2	2	2	2	2	1	2	2	2	2	2	3	2	2	3	2	3	0	0	0	0	0	0	0	0	0	0	0	0	0	2	2	2	2
30	2	3	4	1	2	1	2	1	3	2	2	1	1	3	2	2	3	2	1	0	0	0	0	0	0	0	0	0	0	0	0	0		2	3	2
38	2	2		2	2	2	3	2	2	0	2	2	2	2	0	1	1	1	2	1	3	2	0	0	0	0	0	0	0	0	0	0	3	2	2	4
22	3	3	3	0	0	3	3	4	2	3	4	4	3	3	3	3	3	3	2	2	2	2	1	1	2	1	0	1	0	0	0	0	3	2	2	4
27	0	2	3	1	2	3	2	1	2	1	2	1	3	2	1	2	1	2	1	0	0	1	0	0	0	0	0	0	0	0	0	0	3	2	2	3
30	3	3	3	2	3	3	3	3	3	2	3	3	3	3	3	3	3	3	3	0	0	0	0	0	0	0	0	0	0	0	0	0	3	1	2	2
27	4	3	3	3	4	4	3	3	4	4	3	3	3	3	3	3	3	3	4	0	0	0	0	0	0	0	0	0	0	0	0	0	3	1	2	3
20	4	3	2	4	4	4	4	4	4	4	4	4	4	4	4	4	4	4	4	2	2	3	2	0	2	0	0	0	0	0	0	0	2	2	2	2
24	3	4	4	2	3	2	2	3	4	3	3	3	3	2	3	3	4	2	4	2	2	2	0	2	2	0	1	1	0	0	0	0	3	5	3	3
21	0	1	2	0	4	1	0	1	4	1	4	0	4	0	0	2	3	0	4	0	0	0	0	0	0	0	0	0	0	0	0	0	2	1	1	2
20	1	2	3	4	4	4	3	4	4	4	4	3	4	4	4	4	4	4	4	0	0	0	0	0	0	0	0	0	0	0	0	0	3	2	2
22	4	4	3	4	4	4	3	4	4	3	4	3	4	4	4	4	4	4	4	2	1	0	0	0	0	0	0	0	0	0	0	0	3	1	3	3
26	1	1	2	2	3	3	2	3	4	3	1	2	2	2	3	3	3	3	3	0	0	0	0	0	0	0	0	0	0	0	0	0	3	2	2	3
28	4	4	3	1	4	2	3	3	4	3	1	3	3	1	3	3	2	2	4	0	0	0	0	0	0	0	0	0	0	0	0	0	4	2	2	2
31	4	4	4	4	4	4	4	4	4	4	4	4	4	4	4	4	4	4	4	0	0	0	0	0	0	0	0	0	0	0	0	0	2	2	2	3
23	4	4	4	4	4	1	4	4	4	4	4	4	3	4	3	4	2	4	4	2	3	3	3	0	0	0	0	0	0	0	0	0	3	2	2	2
28	2	3	1	3	3	2	1	2	2	2	2	2	2	1	1	2	2	2	2	0	0	0	0	0	0	0	0	0	0	0	0	0	2	2	2	2
26	1	1	2	2	3	3	3	3	3	2	2	2	3	2	2	3	3	2	2	0	0	0	0	0	0	0	0	0	0	0	0	0	3	2	2
16	0	1	3	2	1	2	3	2	3	1	2	3	2	2	1	2	1	1	1	0	0	0	0	0	0	0	0	0	0	0	0	0	3		2
34	0	3	3	3	4	4	3	3	4	4	4	1	4	3	3	3	4	4	4	0	0	0	0	0	0	0	0	0	0	0	0	0	3	4	2	2
17	4	3	4	4	4	4	4	4	4	4	2	4	4	4	4	4	4	4	4	2	0	0	0	0	0	0	0	0	0	0	0	0	3	3	2	2
33	1	1	2	1	1	1	2	2	1	2	2	2	2	2	2	2	2	2	2	0	0	0	0	0	0	0	0	0	0	0	0	0	3		2	3
18	0	3	3	4	4	4	4	4	4	3	4	4	4	4	4	4	4	4	4	0	0	0	0	0	0	0	0	0	0	0	0	0	3	1	2	3
24	3	3	3	3	3	3	3	3	3	3	3	3	3	3	3	3	3	3	3	0	0	0	0	0	0	0	0	0	0	0	0	0	3	1	2	4
31	4	4	4	4	4	4	4	4	4	4	4	4	4	4	4	4	4	4	4	0	0	0	0	0	0	0	0	0	0	0	0	0	4	2	3	4
27	4	4	4	4	4	4	4	4	4	4	4	4	4	4	4	4	4	4	4	0	0	0	0	0	0	0	0	0	0	0	0	0	3		1	1
34	1	4	4	1	4	1	1	3	4	1	1	3	1	1	0	4	4	4	4	0	0	0	0	0	0	0	0	0	0	0	0	0	3	1	2	2
36	1	1	2	0	2	0	2	0	0	0	0	1	1	1	1	2	2	1	2	3	3	3	1	0	0	0	0	0	0	0	0	0	2	2	2	2
23	4	4	4	4	4	4	4	4	4	4	4	4	3	4	4	4	3	4	4	0	0	0	0	0	0	2	0	0	0	0	0	0	3	1
14	4	4	4	4	4	4	4	4	4	4	4	4	4	4	4	4	4	4	4	1	1	0	0	0	0	0	0	0	0	0	0	0	2	1	1	2
28	4	3	3	3	4	3	3	3	3	3	2	3	2	1	2	2	2	2	3	2	0	0	0	0	0	0	0	0	0	0	0	0	4	5	2	2
18	4	4	4	4	4	4	4	4	4	4	4	4	4	4	4	4	4	4	4	2	0	0	0	0	0	0	0	0	0	0	0	0	3	1	3
25	4	4	4	4	4	4	4	4	4	4	4	4	4	4	4	4	4	4	4	0	0	0	0	0	0	0	0	0	0	0	0	0	3	1	2	2
21	1	1	1	1	1	1	1	1	1	1	1	4	1	1	1	1	1	1	1	1	0	0	0	0	0	0	0	0	0	0	0	0	2	1	1	2
24	4	4	4	4	4	4	4	4	4	4	4	4	4	4	4	4	4	4	4	0	0	1	0	0	0	0	0	0	0	0	0	0	3	5	3	2
22	0	2	2	0	4	3	2	0	4	2	4	4		4	4	2	3	4	4	3	2	3	0	0	0	0	0	0	0	0	0	0	1	1	1	2
25	3	3	3	3	3	3	3	3	3	3	3	3	3	3	3	3	3	3	4	0	0	0	0	0	0	0	0	0	0	0	0	0	2	2	2	2
24	0	2	4	2	4	2	2	2	4	2	4	4	4	4	3	2	4	4	4	0	0	0	0	0	0	0	0	0	0	0	0	0	3	2	2	2
27	3	2	3	4	4	3	3	3	3	3	3	3	3	2	2	2	3	2	4	0	0	0	0	0	0	0	0	0	0	0	0	0	3	3	2	2
21	1	2	1	1	2	2	2	2	2	1	1	1	2	1	1	2	2	1	2	0	1	1	0	0	0	0	0	0	0	0	0	0	3	2	3	3
16	4	4	4	4	4	4	4	4	4	4	4	4	4	4	4	4	4	4	4	0	0	0	0	0	0	0	0	0	0	0	0	0	2	1	2	2
28	4	4	4	4	4	4	4	4	4	4	4	4	4	4	4	4	4	4	4	0	0	0	0	0	0	0	0	0	0	0	0	0	3	1	2	4
32	4	4	4	4	4	4	4	4	4	4	4	4	4	4	4	4	4	4	4	0	0	0	0	0	0	0	0	0	0	0	0	0	3	2	3	2
24	4	3	3	4	4	4	3	4	4	4	4	4	3	4	4	4	4	3	4	0	0	0	0	0	0	0	0	0	0	0	0	0	3	1	2	3
25	0	2	2	4	2	2	0	0	2	0	1	1	0	2	2	1	2	2	1	3	2	1	1	0	2	0	0	1	0	0	0	0	3	1	2	3
26	3	3	2	3	4	4	3	2	4	3	3	3	4	4	3	3	4	4	4	0	0	0	0	0	0	0	0	0	0	0	0	0	4	4	3	2
32	2	2	1	2	2	1	2	2	1	2	1	2	2	2	4	4	2	2	2	2	0	2	0	0	0	0	0	0	0	0	0	0	3	2	3	3
23	1	1	1	1	1	1	1	1	1	4	2	2	3	0	2	2	2	2	2	0	0	0	0	0	0	0	0	0	0	0	0	0	3	2	2	4
99	1	1	2	3	1	3	1	3	2	2	1	3	1	1	1	2	3	2	3	1	1	0	0	0	0	0	0	0	0	0	0	0	4	5		4
35	3	4	4	1	4	4	4	4	4	3	0	2	3	4	4	3	4	4	4	0	0	0	0	0	0	0	0	0	0	0	0	0	3	1	2	3
30	4	3	4	4	4	4	3	4	4	4	4	4	4	4	3	4	4	3	4	0	0	0	0	0	0	0	0	0	0	0	0	0	4	3	3	4
37																				3	0	3	0	0	0	0	0	0	0	0	0	0	3	2	2	2
19	4	4	4	3	4	4	4	4	3	3	3	4	3	4	4	4	4	4	4	0	0	0	0	0	0	0	0	0	0	0	0	0	3	1	2	3
32	4	4	4	4	4	4	4	4	4	4	4	4	4	4	4	4	4	4	4	0	0	0	0	0	0	0	0	0	0	0	0	0	4	5	3
23	3	3	4	4	4	4	3	4	4	4	4	3	3	4	4	4	4	4	4	2	0	0	0	0	0	0	0	0	0	0	0	0		1	1	4
18	4	3	3	2	4	3	3	4	4	4	1	2	3	4	3	4	4	2	4	0	0	0	0	0	0	0	0	0	0	0	0	0	3	1	1	2
24	2	2	2	4	4	2	1	2		4	4	4	4	4	4	4	4	4	4	1	0	0	0	0	0	0	0	0	0	0	0	0	3		2
23	2	2	3	1	3	3	2	3	3	3	2	2	1	2	3	2	1	2	3	1	0	1	0	0	0	0	0	0	0	0	0	0	2	2	2	3
27	4	4	4	4	4	4	4	4	4	4	4	4	4	4	4	4	4	4	4	0	0	0	0	0	0	0	0	0	0	0	0	0	3	2	2	2
29	0	1	1	2	2	3	3	3	3	3	1	3	3	0	1	1	2	1	2	0	0	0	0	0	0	0	0	0	0	0	0	0	3	2	2	4
25	4	3	4	3	4	3	3	4	4	3	4	4	3	4	4	4	4	3	4	0	2	0	0	1	0	1	0	0	0	0	0	0	2	2	2
37	1	1	1		1	1	1	1	1	1	1	1	1	1	1	1	1	1	1	2	2	1	0	1	2	1	1	1	1	1	1	1	2	2	3	2
25	0	4	4	1	4	4	4	4	4	3	2	4	3	3	3	3	3	3	4	0	2	2	2	0	0	0	0	0	0	0	0	0	3	2	2	3
15	4	4	4	4	4	4	4	4	4	4	4	4	4	4	4	4	4	4	4	0	0	0	0	0	0	0	0	0	0	0	0	0	3	2		4
23		4	4	4	4	4	4	4	4	4	4	4	4	4	4	4	4	4	4	0	0	0	0	0	0	0	0	0	0	0	0	0	3	1	2	2
30	4	4	4	4	4	4	4	4	4	4	4	4	4	4	4	4	4	4	4	0	0	0	0	0	0	0	0	0	0	0	0	0	3	2	2	3
18	4	3	3	3	3	3	3	3	3	3	3	2	3	4	2	2	3	3	2	0	0	0	0	0	0	0	0	0	0	0	0	0	3	1	2	2
31	3	4	3	3	3	4	3	3	3	3	3	3	3	3	3	3	3	3	3	3	2	2	0	1	1	0	0	0	0	0	0	0	4	4	2	3
15	4	0	0	0	4	4	4	4	4	4	4	4	4	4	4	4	0	4	4	0	0	0	0	0	0	0	0	0	0	0	0	0	2	2	2	3
26	2	1	3	0	4	1	1	1	3	1	3	2	2	1	0	2	1	1	4	2	1	0	0	0	0	0	0	0	0	0	0	0	3	4	2	2
12	4	4	4	4	4	4	4	4	4	4	4	4	4	4	4	4	4	4	4	0	0	0	0	0	0	0	0	0	0	0	0	0	1	1	2
39	4	4	3	4	4	4	3	4	4	3	3		4	3	2	2	4	2	4	2	0	0	0	0	0	0	0	0	0	0	0	0	3	4	3	4
30	2	2	2	0	4	2	3	3	3	3	2	3	2	2		2	3	2	3	0	0	0	0	0	0	0	0	0	0	0	0	0	3	1	3	4
22	3	3	3	3	4	4	4	4	4	4	4	4	4	3	4	4	4	4	4	1	0	0	0	0	1	0	0	0	0	0	0	0	4	2	3	3
28	2	3	3	2	3	4	3	4	4	4	2	2	2	2	4	4	4	3	4	0	0	0	0	0	0	0	0	0	0	0	0	0	3	2	3	3
21	3	3	3	3	4	4	3	1	2	2	4	1	2	4	2	2	3	1	4	1	0	0	0	0	0	0	0	0	0	0	0	0	3	2	2	3
24	4	4	4	4	4	3	4	4	4	3	4	4	4	4	4	4	4	4	4	0	0	0	0	0	0	0	0	0	0	0	0	0	3	1	2	3
27	3	2	2	2	3	2	1	1	3	1	1	2	1	3	1	1	2	1	3	0	0	0	0	0	0	0	0	0	0	0	0	0	1	2	2	2
26	2	2	2	2	2	2	2	2	2	2	2	2	2	2	2	2	2	2	2	0	0	0	0	0	0	0	0	0	0	0	0	0		1		2
18	1	2	0	0	0	3	2	0	0	0	0	0	0	0	0	0	0	0	0	0	0	0	0	0	0	0	0	0	0	0	0	0	2	2	2
27	4	4	4	4	4	4	4	4	4	4	4	4	4	4	4	4	4	4	4	2	1	2	0	0	0	0	0	0	0	0	0	0	3	2	2	3
28	4	4	4	4	4	3	3	4	4	4	3	3	4	4	4	3	4	3	4	0	0	0	0	0	0	0	0	0	0	0	0	0	4	4	2	3
22	2	4	2	4	4	2	4	2	4	4	4	2	3	2	4	2	4	2	4	0	1	0	0	0	0	0	0	0	0	0	0	0	3	1	3	2
26	4	4	4	4	4	3	4	4	3	3	4	4	3	4	4	4	3	2	4	0	0	0	0	0	0	0	0	0	0	0	0	0	2	1	2	2
27	4	4	4	4	4	4	4	4	4	4	4	4	4	4	4	4	4	4	4	1	0	1	0	0	0	0	0	0	0	0	0	0	3		2
25	2	3	3	2	2	3	3	3	2	2	2	3	2	2	2	2	2	2	2	2	1	0	0	0	0	0	0	0	0	0	0	0	4	4	3	3
17	4	3	3	4	4	4	4	4	4	4	4	4	4	3	4	4	4	4	4	2	0	1	0	1	0	0	0	0	0	0	0	0	2	4	2	1
25	3	4	4	4	4	4	4	4	4	4	4	4	4	4	4	4	4	4	4	2	0	0	0	0	0	0	0	0	0	0	0	0	1	1	1	1
27	3	2	4	4	4	4	4	4	4	4	4	4	4	2	2	3	4	4	4	0	0	0	0	0	0	0	0	0	0	0	0	0	4	2	3	3
15	1	4	4	3	4	4	4	4	4	4	3	4	4	4	4	4	4	4	4	0	0	0	0	0	0	0	0	0	0	0	0	0	3	2		4
24	3	3	3	3	4	4	4	4	4	4	4	4	4	4	4		4	4	4	0	0	0	0	0	0	0	0	0	0	0	0	0	3	1	2
25	2	1	2	1	2	1	2	2	2	1	1	1	1	1	1	1	1	1	2	0	0	0	0	0	0	0	0	0	0	0	0	0	3	4	2	2
27		0	1	1	3	1	1	1	2	2	1	1	1	2	1	1	3	1	2	0	0	1	0	0	0	0	0	0	0	0	0	0	3	2	2	3
23	1	1	3	2	4	3	3	3	3	4	1	3	1	1	0	2	3	2	4	2	1	1	0	0	0	0	0	0	0	0	0	0	2	2	1	2
24	0	2	2	4	4	4	2	0	3	2	4	2	4	0	2	3	4	4	4	0	0	0	0	0	0	0	0	0	0	0	0	0	2	2	2	2
23	2	3	3	3	3	3	3	3	3	3	3	3	3	3	3	3	3	3	3	2	2	2	0	0	0	0	0	0	0	0	0	0	3	2	2	4
40	4	4	4	4	4	4	4	4	4	4	4	4	4	4	4	4	4	4	4	0	0	0	0	0	0	0	0	0	0	0	0	0	2		2	2
29	1	0	1	2	4	3	2	2	1	2	1	1	1	1	1	1	2	1	1	3	2	1	2	1	1	0	1	0	0	0	0	0	2	2	2	2
23	4	4	4	4	4	4	4	4	4	4	4	4	4	4	4	4	4	4	4	0	0	0	0	0	0	0	0	0	0	0	0	0	2	3	2	2
27	0	2	3	0	4	4	2	2	2	2	3	4	4	3	1	4	2	4	4	0	0	0	0	0	0	0	0	0	0	0	0	0	3	2	1	3
17	2	3	4	4	4	4	4	4	4	3	3	4	3	4	3	4	4	3	4	1	0	0	0	0	0	0	0	0	0	0	0	0	3	1	3	4
25	2	3	2	1	2	2	2	1	2	0	2	1	2	2	1	2	2	2	2	1	2	1	0	0	0	0	0	0	0	0	0	0	2	2	2	2
21	0	4	4	4	4	4	4	4	4	4	4	2	4	4	4	4	4	4	4	3	0	0	0	0	0	0	0	0	0	0	0	0	3	1	2	2
26	4	4	4	4	4	4	4	4	4	4	4	4	4	4	4	4	4	4	4	0	0	0	0	0	0	0	0	0	0	0	0	0	4	3	3	4
25	4	2	4	4	3	4	4	3	3	3	4	2	2	3	2	2	3	2	2	2	0	0	0	0	0	0	0	0	0	0	0	0	3	2	3
24	4	4	4	3	4	3	4	4	4	3	4	3	3	4	3	4	4	4	4	2	1	2	3	3	2	2	2	1	1	0	0	0	3		1
32	1	4	4	4	4	4	4	4	4	4	4	4	4	4	4	4	4	4	4	2	0	0	0	0	0	0	0	0	0	0	0	0	2	1	3	3
19	4	4	3	4	4	4	4	4	4	3	4	4	4	4	4	4	4	4	4	1	0	0	0	0	0	0	0	0	0	0	0	0		1	2	3
29	1	0	1	2	3	1	1	1	2	0	1	1	1	1	0	0	1	0	2	1	1	0	0	0	0	0	0	0	0	0	0	0	2	2	2	2
18	3	3	4	4	4	4	4	2	4	2	4	4	4	4	4	3	4	4	0	0	0	0	0	0	0	0	0	0	0	0	0	0	3	1
25	3	3	2	4	3	3	2	3	4	2	4	2	4	4	3	3	4	3	4	2	0	0	0	0	0	0	0	0	0	0	0	0	2	1	1	1
29	3	4	4	4	4	3	4	4	4	3	4	4	4	4	4	4	4	3	4	0	0	0	0	0	0	0	0	0	0	0	0	0	4	5	3	4
27	4	4	4	3	4	4	2	2	4	3	2	3	3	3	4	4	4	3	4	0	0	0	0	0	0	0	0	0	0	0	0	0		2	3	3
33	4	4	4	4	4	3	3	4	4	4	1	2	4	4	2	2	2	4	4	0	0	0	0	0	0	0	0	0	0	0	0	0	1
42	4	4	4	4	4	4	4	4	4	4	4	2	4	4	4	4	4	3	4	0	0	0	0	0	0	0	0	0	0	0	0	0	2	1	2	2
19	3	2	2	3	3	1	2	2	2	2	3	2	0	3	1	2	2	2	2	1	1	0	0	0	0	0	0	0	0	0	0	0	3	3	2	2
33																				0	0	0	0	0	0	0	0	0	0	0	0	0	3	2	2	3
28	4	4	4	4	4	4	4	4	4	4	4	4	4	4	4	4	4	4	4	0	0	0	0	0	0	0	0	0	0	0	0	0	3	4	3	4
30	4	2	2	0	4	2	3	2	4	3	4	4	3	4	2	2	4	1	4	0	0	0	0	0	0	0	0	0	0	0	0	0	2	1	3	4
33	4	4	4	4	4	4	4	4	4	4	4	4	4	4	4	4	4	4	4	0	0	0	0	0	0	0	0	0	0	0	0	0	2	1	1	2
19	1	2	2	3	1	2	1	1	3	4	4	3	1	3	3	3	2	4	4	0	0	0	0	0	0	0	0	0	0	0	0	0	3	2	2	2
28	0	0	0	0	0	0	0	0	4	0	0	0	0	0	0	0	0	0	0	0	0	0	0	0	0	0	0	0	0	0	0	0	3		1	2
28	1	3	4	4	4	4	3	4	4	4	4	4	4	4	4	4	4	4	4	2	2	0	0	0	1	0	0	0	0	0	0	0	3	1	3	3
19	4	4	4	2	4	2	4	4	4	4	4	4	4	4	4	4	4	4	2	0	0	0	0	0	0	0	0	0	0	0	0	0	3	2	2	2
32	4	4	4	3	4	4	3	4	4	4	3	2	3	3	4	3	3	3	4	0	0	0	0	0	0	0	0	0	0	0	0	0	3	2	3	4
23	0	2	3	1	4	4	3	2	2	1	2	3	2	2	1	1	4	2	3	3	2	1	1	1	2	0	0	0	0	0	0	0	3	1	2	3
41	1	1	1	1	1	1	1	2	1	1	0	1	1	1	1	1	2	2	2	3	3	3	0	0	0	0	0	0	0	0	0	0	2	1	1	2
20	4	3	4	1	2	2	3	4	1	2	0	4	2	1	3	4	2	2	2	1	0	0	0	0	0	0	0	0	0	0	0	0	3	1	2	2
32	4	4	4	4	4	4	4	4	4	4	4	4	4	4	4	4	4	4	4	0	0	0	0	0	0	0	0	0	0	0	0	0	3	2	2	4
41	3	2	3	3	3	3	3	3	2	2	2	2	2	2	1	2	2	2	3	0	0	0	0	0	0	0	0	0	0	0	0	0	4	2	2	2
19	2	2	3	3	4	1	2	2	4	4	3	2	2	2	2	2	4	2	4	0	0	0	0	0	0	0	0	0	0	0	0	0	3	1	2	2
24	0	1	2	4		4	4	4	4	4	1	4	2	0	2	1	4	4	4	1	0	0	0	0	0	0	0	0	0	0	0	0	3	1	2	2
16	4	4	4	4	4	4	4	4	4	4	4	4	4	4	4	4	4	4	4	0	0	0	0	0	0	0	0	0	0	0	0	0	3	1	2	2
17	4	4	4	4	4	4	4	4	4	4	4	4	4	4	4	4	4	4	4	3	1	0	0	0	0	0	0	0	0	0	0	0	3	1	2	2
15	4	4	4	4	4	3	4	4	4	4	4	4	4	4	4	4	4	3	4	1	0	0	0	0	0	0	0	0	0	0	0	0	2	2	3	3
24	4	2	3	4	4	4	3	4	4	4	4	3	3	4	3	3	3	3	4	0	0	0	0	0	0	0	0	0	0	0	0	0	3	1	3	2
22	4	2	4	4	4	2	2	4	3	3	1	2	1	4	2	2	2	2	3	2	1	1	0	0		0	0	0	0	0	0	0	3	2	3	4
21	2	2	1	4	4	4	4	1	4	4	4	1	4	4	4	4	4	4	4	0	0	0	0	0	0	0	0	0	0	0	0	0	3	2	2	2
24	0	4	3	0	4	4	3	4	4	4	3	2	4	3	2	3	4	4	4	0	0	0	0	0	0	0	0	0	0	0	0	0	2	1	2
22	4	1	2	1	3	3	3	2	3	2	1	2	4	1	4	3	3	3	3	0	0	0	0	0	0	0	0	0	0	0	0	0	3	1	2
28	4	4	4	4	4	4	4	4	3	3	2	4	4	4	4	4	4	2	4	0	2	2	0	0	0	0	0	0	0	0	0	0	3	1	2	2
29	3	4	4	4	4	4	4	1	4	3	4	3	4	3	3	3	4	2	4	0	0	0	0	0	0	0	0	0	0	0	0	0	1	2		2
26	4	4	4	4	4	4	4	4	4	4	4	4	3	4	4	4	4	4	4	0	0	0	0	0	0	0	0	0	0	0	0	0	3	2	3	3
33	2	3	1	3	3	2	2	2	3	2	2	2	1	2	1	2	2	1	3	0	0	0	0	0	0	0	0	0	0	0	0	0	3	4	2	3
33	4	4	4	4	4	4	4	4	4	4	4	4	4	4	4	4	4	4	4	0	0	0	0	0	0	0	0	0	0	0	0	0	3	1	3	4
22	4	4	4	4	4	4	4	4	4	4	4	4	4	4	4	4	4	4	4	0	0	0	0	0	0	0	0	0	0	0	0	0	3	4	3	2
16	0	1	3	1	4	3	4	2	4	4	1	2	2	4	3	2	1	2	4	0	0	0	0	1	1	0	0	0	0	0	0	0	2	1
29	3	2	2	4	3	4	2	3	3	3	3	3	4	4	4	3	4	2	3	0	1	0	0	0	0	0	0	0	0	0	0	0	3	2	3	4
24	2	2	2	2	3	2	2	2	2	2	2	2	2	2	1	1	2	2	3	0	0	0	0	0	0	0	0	0	0	0	0	0	3	2	2	2
28	4	4	4	1	4	4	4	4	4	1	3	4	4	4	4	4	4	4	4	0	0	0	0	0	0	0	0	0	0	0	0	0	3	4	2
21	0	3	3	0	4	4	4	4	4	4	4	4	4	4	4	4	4	4	4	0	0	0	0	0	0	0	0	0	0	0	0	0	3	2	1	2
33	0	1	2	0	2	2	2	2	2	1	1	0	1	1	1	1	2	2	2	0	0	0	0	0	0	0	0	0	0	0	0	0	2	1	2	2
19	2	3	1	3	4	4	3	4	4	4	1	1	4	4	2	2	4	1	3	2	1	2	0	0	0	0	0	0	0	0	0	0	3	2	1	3
30	4	4	4	4	4	4	4	4	4	4	4	4	4	4	4	4	4	4	4	0	0	0	0	0	0	0	0	0	0	0	0	0	3	2	3
30	4	4	4	4	4	3	4	4	4	3	4	4	2	3	4	4	4	4	4	0	0	0	0	0	0	0	0	0	0	0	0	0	3	1	3	4
26	1	1	1	1	0	1	1	1	0	1	0	1	1	0	0	1	1	1	1	2	0	0	0	0	0	0	0	0	0	0	0	0	2	1	2	2
29	3	2	2	4	2	3	2	0	3	3	4	1	2	2	0	2	3	1	2	1	2	2	0	0	0	0	0	0	0	0	0	0	3	4	2	3
26	4	4	4	3	4	4	4	4	3	4	2	4	4	4	3	3	4	3	4	0	0	0	0	0	0	0	0	0	0	0	0	0	4	3	3	4
26	0	1	4	4	3	4	3	1	4	3	3	3	4	3	2	2	4	4	4	0	0	0	0	0	0	0	0	0	0	0	0	0	3	1	3	4
16	1	4	0	4		2	0	2	4	4	2	3	1	2	1	1	1	1	4	0	0	0	0	0	0	0	0	0	0	0	0	0		1		2
16	0	3	4	0	4	4	4	3	4	4	1	4	3	3	4	3	3	4	4	0	0	0	0	0	0	0	0	0	0	0	0	0	3		2	2
25	4	3	3	2	4	3	3	3	4	3	3	3	3	3	3	3	3	3	3	3	2	2	0	0	0	0	0	0	0	0	0	0	3	3	3	4
33	4	4	4	4	4	4	3	4	4	4	4	4	4	4	4	4	4	4	4	0	0	0	0	0	0	0	0	0	0	0	0	0	2	2		4
33	1	2	2	2	1	1	1	2	0	0	2	2	0	2	0	1	0	0	0	1	0	0	0	0	0	0	0	0	0	0	0	0	1	2	2	3
20	4	4	4	4	4	4	3	4	4	4	4	4	4	4	4	4	4	4	4	1	0	1	0	0	0	0	0	0	0	0	0	0	3	1	2
29	1	2	3	1	4	4	3	2	1	0	0	3	2	1	1	1	4	3	2	0	0	0	1	0	0	0	0	0	0	0	0	0	3	2	3	3
21	4	4	4	2	4	4	4	3	4	4	3	2	3	3	4	3	4	4	4	0	0	2	0	0	0	0	0	0	0	0	0	0	2	1	2	2
25	1	3	4	4	4	4	3	4	0	1	1	1	1	0	0	3	2	2	1	0	0	0	0	0	0	0	0	0	0	0	0	0	3	1	3	3
27	2	3	4	2	4	4	4	3	4	4	1	3	3	2	3	3	4	4	4	2	2	0	0	1	2	0	0	0	0	0	0	0	4	5	3	4
36	1	2	2		4	3	1	4	4	3	2	1	3	2	2	2	3	1	3	0	0	2	0	0	0	0	0	0	0	0	0	0	3	2	2	4
17	1	1	2	1	0	0	1	1	1	1	0	1	1	0	1	1	0	0	1	0	0	0	0	0	0	0	0	0	0	0	0	0	2	2	1	2
14	0	0	0	0	4	4	4	4	4	4	4	4	4	4	4	4	4	4	0	0	0	0	0	0	0	0	0	0	0	0	0	0	2	1	1
19	0	2	3	1	4	4	1	3	4	4		3	4	4	4	4	4	4	4	0	0	0	0	0	0	0	0	0	0	0	0	0	2	1	1	2
31	1	1	0	0	2	2	1	1	1	1	0	1	1	0	1	0	0	0	4	3	0	0	0	0	0	0	0	0	0	0	0	0	2	2	2	2
19	4	3	3	4	3	4	3	3	4	4	4	3	3	4	3	3	4	3	4	3	3	3	0	0	0	0	0	0	0	0	0	0	3	2	2	4
28	1	3	2	1	3	3	2	2	3	1	1	1	3	2	2	2	3	2	3	0	0	0	0	0	0	0	0	0	0	0	0	0	3	2	2	3
32	2	2	4	4	4	4	2	4	4	4	4	4	4	4	4	4	4	4	4	2	2	0	0	0	0	0	0	0	0	0	0	0	3	1	3
22	4	3	3	4	4	3	4	4	4	4	3	3	3	4	3	3	3	3	3	0	0	0	0	0	0	0	0	0	0	0	0	0	3	2	2
21	0	4	4	4	4	4	4	4	4	3	4	4	4	4	4	4	4	4	4	0	0	0	0	0	0	0	0	0	0	0	0	0	2	1	1	1
19	3	4	4	4	4	4	4	4	4	4	4	4	4	4	4	4	4	4	4	1	1	2	1	0	0	0	0	0	0	0	0	0	3	6	3	4
22	2	3	3	1	3	2	3	3	4	4	4	3	4	2	3	3	4	4	4	0	0	0	0	0	0	0	0	0	0	0	0	0	3	1	2	2
21	1	1	1	1	4	4	2	2	2	2	1	1	4	1	1	1	4	1	4	0	0	0	0	0	0	0	0	0	0	0	0	0	2	2	1	2
13	1	4	2	2	3	3	2	1	4	1	0	1	4	4	4	4	3	2	4	1	2	1	0	0	0	0	0	0	0	0	0	0	2	1	2	1
22	4	4	4	4	4	3	4	3	4	4	3	4	3	4	2	4	4	3	4	0	0	0	0	0	0	0	0	0	0	0	0	0	3	1	2	3
22	3	3	4	4	4	3	3	3	2	2	3	3	2	3	2	2	2	2	3	1	0	1	0	0	0	0	0	0	0	0	0		3	2	2	3
21	2	2	2	4	4	2	3	2	4	3	1	2	3	2	2	2	3	1	4	0	0	0	0	0	0	0	0	0	0	0	0	0	3	1	3	2
34	4	3	4	4	4	3	4	4	4	4	4	4	4	4	4	4	4	3	4	1	0	0	0	0	0	0	0	0	0	0	0	0	4	5	3	4
25	2	3	3	4	2	2	2	2	3	0	4	2	2	4	4	4	4	0	0			2	0	0	0	0	0	0	0	0	0	0	2	1	1	1
37	4	4	4	2	4	2	4	2	0	1	4	4	2	4	1	4	4	4	4	0	0	0	0	0	0	0	0	0	0	0	0	0	2	2	2	2
28	2	2	1	2	2	2	2	2	2	2		2	2	2	2	2	2	2	2	0	0	0	0	0	0	0	0	0	0	0	0	0	3	1	1	3
23	1	2	3	3	4	3	2	2	2	3	2	2	3	2	3	2	3	3	4	2	1	1	0	0	0	0	0	0	0	0	0	0	3	2	3	4
14	3	3	4	3	4	4	3	2	3	2	4	4	2	2	3	2	4	3	3	0	0	0	0	0	0	0	0	0	0	0	0	0	2	2	1	2
17	4	4	4	4	4	4	4	3	4	4	4	4	4	4	4	3	3	4	4	0	0	1	0	0	0	0	0	0	0	0	0	0	3	2	2	2
28	4	4	4	4	4	4	4	4	4	4	4	4	4	4	4	4	4	4	4	0	0	0	0	0	0	0	0	0	0	0	0	0	3	2	2	2
39	3	1	0	3	4	2	2	2	3	2	2	0	2	1	0	2	2	1	2	0	0	0	0	0	0	0	0	0	0	0	0	0	3	1	2	2
28	2	4	4	4	4	0	4	4	4	0	4	2	0	0	0	0	4	0	0	0	0	0	0	0	0	0	0	0	0	0	0	0	1	1	1	2
26	0	2	2	2	4	4	3	2	4	3	4	4	4	4	2	2	3	3	4	0	0	0	0	0	0	0	0	0	0	0	0	0	3	2	2	2
25	4	4	4	4	4	4	4	4	4	4	4	4	4	4	4	4	4	4	4	0	0	0	0	0	0	0	0	0	0	0	0	0	3	1	2	2
22	1	1	2	4	4	4	0	4	4	4	2	4	4	0	4	3	3	4	4	0	1	0	0	0	0	0	0	0	0	0	0	0	3	4	2	2
30	0	2	1	0	2	2	1	2	0	1	0	2	2	0	1	1	2	2	2	0	0	0	0	0	0	0	0	0	0	0	0	0	2		2	2
20	1	1	1	1	4	4	3	3	4	4	4	4	4	4	4	4	2	4	4	1	1	0	0	0	0	0	0	0	0	0	0	0	3	6	2	4
33	1	1	0	1	2	2	1	0	2	2	1	1	1	1	1	1	2	2	3	1	3	0	0	0	0	0	0	0	0	0	0	0	1	2	1	1
22	0	2	2	1	1	2	2	1	2	2	1	1	2	1	1	2	2	2	3	0	0	0	0	0	0	0	0	0	0	0	0	0	3	4	2	4
23	4	4	4	4	4	4	4	4	4	4	4	4	4	4	4	4	4	4	4	0	0	0	0	0	0	0	0	0	0	0	0	0	4	6	2	4
25	4	4	2	4	4	4	4	4	4	4	0	4	4	4	4	4	4	4	4	0	0	0	0	0	0	0	0	0	0	0	0	0	4	6	3	3
29	2	2	3	3	3	1	2	2	3	1	1	1	1	2	3	2	1	2	3	0	0	0	0	0	0	0	0	0	0	0	0	0	3	1	2	2
39	3	2	2	1	3	3	3	3	4	1	2	2	2	3	2	3	4	4	4	0	2	0	0	0	0	0	0	0	0	0	0	0	3	1	2	2
19	4	3	2	3	4	2	2	3	4	4	3	1	4	3	3	3	3	2	3	0	0	0	0	0	0	0	0	0	0	0	0	0	3	1	1
26	1	2	2	1	2	3	2	2	3	3	2	3	3	3	3	3	4	4	4	0	0	0	0	0	0	0	0	0	0	0	0	0	3	2	2	3
19	1	4	4	4	4	4	3	4	4	4	3	4	4	3	3	3	3	4	4	0	0	0	0	0	0	0	0	0	0	0	0	0	3	2	2	2
23	2	4	4	4	4	4	3	4	4		0	1	0	2	0	0	0	0	1	0	0	0	0	0	0	0	0	0	0	0	0	0	3	1	2	3
20	0		0	0	2	0	3	0	0	0		1	1	1	1	1	1	1	2	0		0						0	0	0	0		1	2	1	2
38	1	2	2	2	4	4	4	3	4	4	3	3	3	3	3	3	3	3	4	0	0	0	0	0	0	0	0	0	0	0	0	0	1	2		4
18	2	2	2	2	2	2	2	2	2	2	2	2	2	3	3	2	2	2	2	0	0	0	0	0	0	0	0	0	0	0	0	0	3	2	2
29	4	4	4	4	4	4	4	4	4	4	4	4	4	4	4	4	4	4	4	0	0	0	0	0	0	0	0	0	0	0	0	0	4	5	3	3
41	4	3	3		2	3	3	4	3	2	4	3	3	4	3	3	4	2	4	0	0	0	0	0	0	0	0	0	0	0	0	0	3	3	3	4
23	2	2	4	4	4	4	4	4	4	1	2	2	2	2	2	2	2	2	2	0	0	0	0	0	0	0	0	0	0	0	0	0	2	1	1	2
21	4	4	4	4	4	4	4	4	4	4	4	4	4	4	4	4	4	4	4	2	1	3	0	1	1	1	1	0	0	0	0	0	3	4	3
24	4	4	4	4	4	3	3	4	4	3	3	4	3	4	3	4	3	3	3	0	0	0	0	0	0	0	0	0	0	0	0	0	3	2	2	2
20	4	4	4	3	4	4	4	4	4	4	3	4	4	3	4	4	4	4	4	1	0	0	0	0	0	0	0	0	0	0	0	0	3	2	2	3
19	2	2	2	1	4	4	2	2	1	1	1	1	1	1	1	1	1	2	1	1	0	0	0	0	0	0	0	0	0	0	0	0	2	1	3	2
25	4	4	4	0	4	2	2	4	4	4	0	4	4	4	4	4	4	4	4	1	2	0	0	0	0	0	0	0	0	0	0	0	1	1	1	2
16	2	2	2	3	4	4	2	2	2	2	1	1	4	3	1	0	1	2	2	0	0	0	0	0	0	0	0	0	0	0	0	0	3	2	3	4
31	2	2	2	2	2	2	2	2	2	2	2	2	2	2	2	2	2	2	2	0	0	0	0	0	0	0	0	0	0	0	0	0	1		2	2
22	4	4	3	4	4	4	3	4	4	4	4	4	4	4	4	4	4	4	4	0	0	0	0	0	0	0	0	0	0	0	0	0	3	2	1	2
23	2	3	2	4	4	4	3	2	4	2	4	2	2	4	1	2	4	2	4	2	2	2	1	2	1	1	0	0	0	0	0	0	3	2	2	4
26	0	1	1	1	2	1	1	0	1	1	0	0	1	1	1	1	0	1	1	1	1	0	1	0	0	0	0	0	0	0	0	1	3	2	2	2
28	4	4	4	4	4	4	4	4	4	4	4	4	4	4	4	4	4	4	4	1	1	0	0	0	0	0	0	0	0	0	0	0	3	2	2	3
17	4	4	4	4	4	4	4	4	4	4	4	4	4	4	4	4	4	4	4	0	0	0	0	0	0	0	0	0	0	0	0	0	2	1	3
18	4	3	2	4	4	4	3	4	4	4	1	4	4	1	4	4	4	4	4	2	1	2	0	2	0	0	0	0	0	0	0	0	3	5	3	2
25	4	4	4	4	4	4	4	4	4	4	4	4	4	4	4	4	4	4	4	2	0	0	0	0	0	0	0	0	0	0	0	0	3	5	3	4
16	0	2	2	0	4	2	0	0	4	4	0	4	4	0	0	0	4	0	4	0	0	0	0	0	0	0	0	0	0	0	0	0	3	2	1	3
16	3	4	4	4	4	4	4	4	4	4	4	4	4	4	4	4	4	4	4	0	0	0	0	0	0	0	0	0	0	0	0	0	2	1	2	3
39	2	1	2	2	3	2	3	1	3	3	0	3	3	2	1	1	3	2	3	0	0	0	0	0	0	0	0	0	0	0	0	0	2	1	3	3
26	1	0	1	2	2	4	0	0	0	2	0	2	0	1	1	1	1	1	2	0	2	0	0	0	0	0	0	0	0	0	0	0	2	1	2	2
22	4	4	4	4	4	4	4	4	4	4	4	4	4	4	4	4	4	4	4	0	0	0	0	0	0	0	0	0	0	0	0	0	3	2	3	4
35	2	2	2	2	2	2	2	1	3	2	3	2	2	3	3	3	3	3	3	0	0	1	0	0	0	0	0	0	0	0	0	0	3	1	2	2
29	2	2	1	4	3	1	0	1	1	1	0	1	2	2	3	2	2	1	2	0	2	0	0	0	0	0	0	0	0	0	0	0	2	2	2
32	2	2	2	4	3	3	3	2	4	2	2	2	2	2	2	2	2	2	4	0	0	0	0	0	0	0	0	0	0	0	0	0	2	1	2	2
29	4	4		3	4	4	4	4	4	4	4	4	4	4	4	4	4	4	4	0	0	0	0	0	0	0	0	0	0	0	0	0	4	3	3	4
23	1	4	2	2	2	2	2	2	1	2	2		3	1	3	2	4	4	4	3	1	1	1	1	1	1	1	0	0	0	1	1	2	1	2	3
25	4	3	4	3	4	4	3	3	4	3	3	4	3	4	3	4	3	2	4	0	0	0	0	0	0	0	0	0	0	0	0	0	4	4	2	3
18	4	4	4	4	4	4	4	4	4	4	4	4	4	4	4	4	4	4	4	0	0	0	0	0	0	0	0	0	0	0	0	0	2	1	2	2
28	3	3		3	1		2	2	3	2	3	3	3	3	3	3	3	3	3	0	0	0	0	0	0	0	0	0	0	0	0	0	2	1	2	2
23	3	2	1	1	1	1	1	2	3	2	2	2	3	4	1	1	2	3	4	0	0	0	0	0	0	0	0	0	0	0	0	0	3	1	3	3
27	2	2	2	1	4	4	1	1	1	1	1	1	1	1	1	1	1	1	4	0	0	0	0	0	0	0	0	0	0	0	0	0	2	1	1	2
23	4	4	4	4	4	4	4	4	4	4	4	4	4	4	4	4	4	4	4	0	0	0	0	0	0	0	0	0	0	0	0	0	3	2	2	2
18	0	4	4	3	4	4	4	4	4	4	4	4	4	4	3	3	4	4	4	0	0	0	0	0	0	0	0	0	0	0	0	0	3	1	2	1
25	2	2	2	2	3	3	3	3	4	3	4	4	3	4	3	3	3		4	0	0	0	0	0	0	0	0	0	0	0	0	0	3	4	2	2
25	4	4	4	4	4	4	4	4	4	4	4	4	4	4	4	4	4	4	4	0	0	0	0	0	0	0	0	0	0	0	0	0	3	2	3
18	4	4	4	3	3	4	4	4	4	4	4	3	4	4	4	4	4	4	4	0	0	0	0	0	0	0	0	0	0	0	0	0	3	1	2
22	2	2	2	3	4	3	2	2	2	2	1	2	2	2		2	4	4	4	0	0	0	0	0	0	0	0	0	0	0	0	0	1	1	2	2
25	4	4	4	4	4	3	3	4	4	3	4	4	3	4	4	4	4	3	4	0	0	0	0	0	0	0	0	0	0	0	0	0	3	2	2	2
18	0	2	2	4	4	3	3	4	4	3	3	4	3	3	2	3	4	4	4	0	0	0	0	0	0	0	0	0	0	0	0	0	3	1	2	2
26	2	2		2	2	2	3	2	2	2	3	4	3	3	2	2	2	4	4	0	0	0	0	0	0	0	0	0	0	0	0	0	3	2	2	3
24	2	2	2	2	3	3	2	2	3	3	2	2	2	2	2	2	3	2	4	0	0	0	0	0	0	0	0	0	0	0	0	0	3	1	2	2
34	0	4	0	0	4	4	4	4	4	2	2	0	4	0	0	2	4	2	2	0	0	2	0	1	0	0	0	0	0	0	0	0	2	2	2	2
18	1	1	1	1	4	4	1	1	4	1	0	1	4	0	0	0	4	4	4	1	1	0	0	1	0	0	0	0	0	0	0	0	3		1	4
25	2	2	0	2	2	2	0	2	2	1	1	2	1	2	1	1	2	1	2	0	0	0	0	0	0	0	0	0	0	0	0	0	1	1	2	2
33	4	4	4	4	4	4	4	4	4	4	4	4	4	4	4	4	4	3	4	0	0	0	0	0	0	0	0	0	0	0	0	0	4	2	2	3
29	2	2	2	2	2	2	2	2	2	1	2	2	2	2	1	1	4	2	4	0	3	3	0	0	1	0	0	0	0	0	0	0	1	1	1	2
26	4	4	4	4	4	4	4	4	4	4	4	4	4	4	4	4	4	4	4	1	1	0	0	0	0	0	0	0	0	0	0	0	3	2	2	2
32	0	0	1	1	3	2	1	0	4	4	1	1	2	2	2	2	4	1	4	0	0	0	0	0	0	0	0	0	0	0	0	0	2	2		4
28	2	2	4	0	3	2	2	4	3	1	4	1	1	3	2	3	3	1	4	3	0	0	0	0	0	0	0	0	0	0	0	0	3	1	1	2
28	3	4	4	3	4	4	3	4	4	3	4	3	4	3	3	3	4	4	4	0	0	0	0	0	0	0	0	0	0	0	0	0	3	2	2	3
28	4	4	4	3	4	4	4	4	4	4	4	4	4	4	3	3	4	3	4	0	0	0	0	0	0	0	0	0	0	0	0	0	3	1	2	3
22	0	3	3	4	2	4	3	4	4	4	4	4	4	4	4	4	4	4	4	0	0	0	0	0	0	0	0	0	0	0	0	0	2	2	2	2
22	0	1	0	0		1	1	0	1	0	0	1	1	2	2	2	2	1	3	0	0	0	0	0	0	0	0	0	0	0	0	0	2	2	2	2
25	4	4	4	4	4	4	4	4	2	2	3	4	4	4	4	4	4	4	4	0		0	0	0	0	0	0	0	0	0	0	0	3	2	2	2
31	4	4	4	4	4	4	4	4	4	4	4	4	4	4	4	4	4	4	4	0	0	0	0	0	0	0	0	0	0	0	0	0	2	3		3
35	2	4	4	2	4	4	4	4	4	4	2	3	4	2	4	4	4	3	4	0	0	0	0	0	0	0	0	0	0	0	0	0	2	2	3	4
20	1	2	2	2	3	3	3	3	3	3	3	3	2	4	4	4	3	3	3	0	0	0	0	0	0	0	0	0	0	0	0	0	3	2	2	3
17	0	4	4	4	4	4	4	4	4	4	4	4	4	4	4	4	4	4	4	0	0	0	0	0	0	0	0	0	0	0	0	0	2	1		4
29	4	4	4	4	4	4	4	4	4	4	4	4	4	4	4	4	4	2	4	0	0	0	0	0	0	0	0	0	0	0	0	0	3	2	2	3
37	4	4	4	1	4	4	4	4	4	4	1	4	4	4	4	4	4	3	4	0	0	0	0	0	0	0	0	0	0	0	0	0	2	2	2	3
25	3	2	4	4	4	4	3	4	3	4	3	3	3	3	2	3	3	3	3	2	0	0	0	0	0	0	0	0	0	1	1	0	3	1	2	2
29	4	2	3	1	4	4	4	4	4	4	1	4	4	3	3	4	4	3	4	0	0	0	0	0	0	0	0	0	0	0	0	0	4	4	3	4
26	4	4	4	4	4	4	4	4	4	4	4	4	4	4	4	4	4	4	4	0	0	0	0	0	0	0	0	0	0	0	0	0	3	2	3	4
27	4	2	4	2	4	2	2	4	2	1	2	4	2	4	2	4	4	4	4	0	0	0	0	0	0	0	0	0	0	0	0	0	3	2	3	3
19	4	4	4	4	4	4	4	4	4	4	4	4	4	4	4	4	4	4	4	0	0	0	0	0	0	0	0	0	0	0	0	0	2	2	2	2
33	4	4	4	3	4	3	4	4	3	3	4	4	3	4	3	4	3	3	4	2	0	0	0	1	0	0	0	0	0	0	0	0	2	2	3	4
20	2	1	1	1	2	3	2	1	2	1	2	1	1	2	2	1	3	2	2	0	0	0	0	0	0	0	0	0	0	0	0	0	3	1	2	1
25	1	1	1	2	2	4	2	2	3	2	1	2	4	2	4	4	4	4	4	0	0	0	0	0	0	0	0	0	0	0	0	0	3	1	2	2
16	4	4	4	4	4	4	3	4	4	4	3	4	4	2	4	2	4	4	4	0	0	0	0	0	0	0	0	0	0	0	0	0	3	4	2
25	2	2	2	2	3	3	4	2	4	3	2	3	4	2	3	3	4	2	3	2	0	0	0	0	0	0	0	0	0	0	0	0	3	2
22	4	4	4	4	4	4	4	4	4	4	2	4	4	1	4	3	4	4	4	0	0	0	0	0	0	0	0	0	0	0	0	0	2	2	2
16	0	2	2	2	4	3	2	3	4	2	1	2	2	1	2	1	2	2	4	0	0	0	0	0	0	0	0	0	0	0	0	0	2	2	2
28	4	2	3	2	4	3	3	1	1	3	3	3	3	4	0	2	4	4	4	0	0	0	0	0	0	0	0	0	0	0	0	0	2	2	2	3
28	2	3	2	3	4	2	3	4	2	2	4	2	3	4	3	3	3	2	3	0	0	0	0	0	0	0	0	0	0	0	0	0	2	1	1	2
29	2	1	3	1	2	2	1	1		2	1	3	3	2	2	2	2	2	2	0	0	0	0	0	0	0	0	0	0	0	0	0	1	1	2	3
25	2	1	1	1	2	1	1	1	2	1	1	1	1	1	1	1	1	1	1	2	1	2	0	0	0	0	0	0	0	0	0	0	4	2	3	4
16	2	3	2	2	3		3	2	1		2	1	3	2	1	2	2	2	2	0	0	0	0	0	0	0	0	0	0	0	0	0	2	1	2	4
20	2	2	4	2	4	4	4	0	2	3	3	3	3	3	4	4	2	4	4	0	0	3	0	0	0	0	0	0	0	0	0	0	3	1	1	2
30	4	4	4	4	4	4	4	4	4	4	4	4	4	4	4	4	4	4	4	0	0	0	0	0	0	0	0	0	0	0	0	0	4	3	3	3
20	4	4	4	4	4	4	4	4	4	4	4	4	4	4	4	4	4	4	4	2	0	0	0	0	0	0	0	0	0	0	0	0	3	1	3	3
18	1	4	4	2	2	4	2	2	2	4	4	2	2	2	2	2	1	2	3	0	0	0	0	0	0	0	0	0	0	0	0	0
33	3	3	3	4	4	3	3	3	4	2	3	3	3	4	3	3	3	3	3	0	0	0	0	0	0	0	0	0	0	0	0	0	3	1	2	2
23	4	4	4	4	4	4	4	4	4	4	4	4	4	4	4	4	4	4	4	0	0	0	0	0	0	0	0	0	0	0	0	0	2	2	3	4
26	4	4	4	4	4	4	4	4	4	4	4	4	4	4	3	4	4	3	4	0	0	0	0	0	0	0	0	0	0	0	0	0	3	2	2	3
40	2	3	2	4	3	1	1	2	3	2	2	2	2	1	2	1	2	1	2	3	3	3	3	1	0	0	0	0	0	0	1	0	1	2	1	2
32	0	2	2	2	4	2	0	0	4	0	1	0	2	2	1	2	4	0	4	0	0	0	0	0	0	0	0	0	0	0	0	0	2	3	2	4
21	0	1	2	3	1	2	2	2	2	2	3	3	1	0	1	1	1	1	1	1	1	2	1	0	0	0	0	0	0	0	0	0	3	2	3	2
24	2	2	3	1	3	2	2	1	2	2	3	3	2	3	1	2	2	1	2	2	0	0	0	0	0	0	0	0	0	0	0	0	4	4	3	4
29	2	4	4	3	4	3	4	4	4	4	4	2	3	2	3	4	3	4	4	0	0	0	0	0	0	0	0	0	0	0	0	0	3	2	2	3
25	1	4	4	4	4	4	4	4	4	4	4	1	4	4	4	4	4	4	4	0	0	0	0	0	0	0	0	0	0	0	0	0	3	2	2	3
27	1	2	3	1	1	3	1	3	1	1	1	3	2	1	1	2	2	2	3	2	0	0	0	0	0	0	0	0	0	0	0	0	3	2	3	3
25	2	4	4	4	4	4	4	3	4	2	3	3	3	3	3	2	2	2	4	0	1	0	0	0	0	0	0	0	0	0	0	0	3	1	2	3
30	1	4	4	4	4	4	4	4	4	4	4	4	4	4	4	4	4	4	4	0	0	0	0	0	0	0	0	1	0	0	0	0	3	2	3	4
31	1	2	3	1	4	3	1	1	4	3	3	3	3	1	0	1	0	3	4	0	0	2	0	0	0	0	0	0	0	0	0	0	3	2	2	1
25	0	2	2	3	4	3	3	1	3	4	0	3	4	0	3	3	3	4	4	0	0	0	0	0	0	0	0	0	0	0	0	0	4	2	3	3
18	4	4	4	4	4	4	4	4	4	4	4	4	4	4	4	4	4	4	4	0	0	0	0	0	0	0	0	0	0	0	0	0	3	1	2	2
22	4	4	4	4	4	4	4	4	4	4	4	4	4	4	3	3	4	3	3	0	0	0	0	0	0	0	0	0	0	0	0	0	3	2	2
21	4	4	4	4	4	4	4	4	4	4	4	4	4	4	4	4	4	4	4	0	0	0	0	0	0	0	0	0	0	0	0	0	3	3	2	2
16	0	2	2	4	4	4	3	4	4	4	2	3	3	4	3	4	4	4	4	1	0	0	0	0	0	0	0	0	0	0	0	0	3	1	2	2
28	2	2	2	1	2	2	2	2	2	2	1	2	2	2	2	2	2	2	2	0	0	0	0	0	0	0	0	0	0	0	0	0	2	2
25	4	4	3	4	4	4	4	3	4	4	4	3	4	4	4	4	4	4	4	0	0	0	0	0	0	0	0	0	0	0	0	0	3	2	2	3
18	4	4	4	4	4	4	4	4	4	4	4	4	4	4	4	4	4	4	4	1	0	0	0	0	0	0	0	0	0	0	0	0	3	2	1	2
28	1	1	3	1	3	2	1	2	3	2	0	2	3	1	1	1	2	1	3	0	0	1	0	0	0	0	0	0	0	0	0	0	2	2	2	2
27	4	4	1	4	4	4	4	4	4	2	0	2	2	2	4	4	4	4	4	0	0	0	0	0	0	0	0	0	0	0	0	0	3	3	2	1
23	0	0	2	4	4	4	4	2	2	2	4	2	2	2	4	2	4	4	4	0	0	0	0	0	0	0	0	0	0	0	0	0	2	2	1	2
19	2	2	2	1	4	3	2	2	0	1	0	1	2	0	1	1	2	3	3	2	1	0	1	1	1	0	0	0	0	0	0	0	2	2	3	2
35	4	2	4	4	4	4	3	4	4	4	3	3	4	3	3	4	4	3	4	0	0	0	0	0	0	0	0	0	0	0	0	0	3	2	3	4
24	2		1	1	4	3	2	3	4	2	2	4	2	2	2	1	3	2	3	1	0	0	0	0	0	0	0	0	0	0	0	0	3	1	2	3
21	4	4	4	4	4	4	4	4	4	4	4	4	4	4	4	4	4	4	4	0	0	0	0	0	0	0	0	0	0	0	0	0	3	1	2	2
31	1	2	2	0	3	4	1	2	3	0	1	3	1	2	1	0	0	3	3	0	0	0	0	0	0	0	0	0	0	0	0	0	2	2	1	2
26	1	1	0	2	2	1	2	1	2	3	3	0	1	2	0	0	1	1	2	2	0	0	0	0	0	0	0	0	0	0	0	0	3	1	3	2
26	1	1	1	1	2	2	2	1	1	1	3	2	1	1	1	1	2	2	2	1	2	2	0	0	0	0	0	0	0	0	0	0	3	2	3	4
21	0	0	2	2	4	2	2	2	1	1	0	2	2	2	2	2	4	2	4	0	0	0	0	0	0	0	0	0	0	0	0	0	3	2
22	3	3	3	3	3	3	3	3	4	3	3	3	3	4	3	3	3	3	3	0	0	0	0	0	0	0	0	0	0	0	0	0	2	1	2	2
22	1	2	2	2	2	2	2	2	1	1	2	2	1	1	2	1	1	1	2	3	3	3	3	1	0	0	0	0	1	1	1	0	3	2	2	2
23	4	4	3	3	4	3	3	3	4	4	3	3	3	3	4	4	3	3	4	1	1	2	0	0	0	0	0	0	0	0	0	0	3	2	2	2
15																																	2	1	2	4
19	3	3	3	3	3	3	3	3	2	2	3	3	2	2	3	3	3	2	2	0	0	0	0	0	0	0	0	0	0	0	0	0	3	2	2	2
20	0	1	1	4	1	1	1	0	1	1	0	1	1	1	0	0	1	1	1	0	0	0	0	0	0	0	0	0	0	0	0	0	3	2	2	2
24	3	0	1	1	1	1	1	0	1	1	1	1	3	4	2	1	1	2	4	2	0	0	0	0	0	0	0	0	0	0	0	0	3	2	1	2
21	0	1	3	2	4	4	3	4	4	4	3	3	3	2	3	3	4	4	4	1	0	0	0	0	0	0	0	0	0	0	0	0	3		3	2
28	2	2	4	0	4	4	4	4	4	4	0	4	4	4	0	0	4	4	4	0	0	0	0	0	0	0	0	0	0	0	0	0	2	1	2	2
24	4	4	4	4	4	4	4	4	4	2	1	1	4	4	4	4	2	4	2	0	0	0	0	0	0	0	0	0	0	0	0	0	3	1	2	2
33	4	4	3	4	4	4	2	2	4	2	4	4	4	4	3	3	4	3	4	0	0	0	0	0	0	0	0	0	0	0	0	0	3	2	2	3
24	4	4	4		4	4	4	4	4	4	3	4	4	4	4	4	4	4	4	2	1	2	0	0	0	0	0	0	0	0	0	0	3	4	3	4
27	0	0	4	4	4	4	4	4	4	4	4	4	4	4	4	4	4	4	4	3	3	3	3	0	0	0	0	0	0	0	0	0	2	2	3
35	4	4	4	4	4	4	4	4	4	4	4	4	4	4	4	4	4	4	4	2	2	2	2	2	2	2	2	2	2	2	2	2	3	5	3	3
26	4	3	4	4	4	4	4	4	4	4	4	4	4	4	4	4	4	4	4	0	0	0	0	0	0	0	0	0	0	0	0	0	3	2	2	2
28	4	4	4	4	4	4	4	4	4	4	4	4	4	4	4	4	4	4	4	0	0	0	0	0	0	0	0	0	0	0	0	0	2	2	3	3
34	0	2	2	3	3	3	2	2	3	2	1	2	2	1	1	1	2	2	2	3	2	1	0	0	0	0	0	0	0	0	0	0	2	4	1	2
33	4	4	4	4	4	4	3	4	4	4	4	4	4	4	4	4	4	4	4	1	0	0	0	0	0	0	0	0	0	0	0	0	3	1	2	2
23	0	0	1	0	1	2	1	1	2	2	2	2	3	3	2	3	4	2	3	0	0	0	0	0	0	0	0	0	0	0	0	0	3	1	2	3
32	0		1	0		2		3		2		1	1	2		2	4		4	0	0		0	0	0	0	0	0	0	0	0	0	3	1	1	1
41	0	0	0	0	0	0	0	1	1	1	1	1	1	1	1	1	0	1	1	0	0	0	1	1	1	1	0	0	0	0	0	0	1	1	2	3
32	3	4	2		1	3	2	3	3	2	4	2	4	3	1	2	3	3	4	1	1	0	0	0	1	0	0	0	0	0	0	0	3	2	2	4
35	3	4	4	4	4	4	4	4	4	4	4	4	4	4	3	4	4	3	4	2	2	0	0	0	0	0	0	0	0	0	0	0	3	2	3	3
36	3	2	3	3	3	3	3	3	3	3	3	3	2	2	3	3	3	3	3	2	1	1	0	0	1	0	0	0	0	0	0	0	3	2	2	2
33	0	0	1	0	1	1	1	0	0	0	0	0	1	0	0	1	0	0	1	3	3	3	3	3	3	3	3	3	3	1	1	1	2			1
19	2	3	4	3	3	2	1	3	1	2	2	3	2	2	1	3	2	2	2	0	0	0	0	0	0	0	0	0	0	0	0	0	3	2		4
19	0	3	3	1	4	4	3	4	4	3	3	3	2	2	3	3	3	3	4	0	0	0	0	0	0	0	0	0	0	0	0	0	2	4	2	2
22	3	4	4	4	4	4	4	4	4	4	4	4	4	4	4	4	4	4	4	0	0	0	0	0	0	0	0	0	0	0	0	0	3	2	3	2
30	0	1	1	2	3	3	2	3	2	2	2	2	1	3	2	3	3	3	3	2	0	0	0	0	0	0	0	0	0	0	0	0	3	4	3	4
29	4	4	4	4	4	4	4	4	4	4	4	4	4	4	4	4	4	4	4	1	0	0	0	0	0	0	0	0	0	0	0	0	3	4	3	3
23	2	3	2	3	4	2	1	2	2	2	2	1	2	2	1	2	2	2	2	0	0	0	0	0	0	0	0	0	0	0	0	0	3	2		4
18	0	1	1	1	1	1	0	1	1	1	1	2	1	1	0	1	2	2	4	0	0	0	0	0	0	0	0	0	0	0	0	0	3	1	2	2
23	2	1	1	2	4	4	2	2	1	3	2	4	3	2	0	0	4	4	4	1	1	0	0	1	1	0	0	0	0	0	0	0	3	1	2	2
24	4	2	2	3	4	4	1	1	1	4	4	1	2	3	4	4	4	3	4	0	0	0	1	0	0	0	0	0	0	0	0	0	3	2		4
32	2	2	1	1	1	2	1	1	2	1	1	1	1	2	1	1	1	1	2	0	0	0	0	0	0	0	0	0	0	0	0	0	3	2	2	3
20	2	2	2	1	2	2	2	3	1	2	2	2	2	2	2	2	2	2	2	2	2	2	2	2	2	2	2	0	0	0	0	0	2	1
23	4	4	4	2	4	4	3	3	4	4	3	3	4	3	2	4	4	4	4	1	1	0	0	0	0	0	0	0	0	0	0	0	3	2	2	3
26	4	4	4	4	4	4	4	4	4	4	4	4	4	4	4	4	4	4	4	0	0	0	0	0	0	0	0	0	0	0	0	0	3	2	2	3
45	3	3	4	4	4	4	4	4	4	4	4	3	4	4	4	4	4	4	4	1	0	1	0	0	0	0	0	0	0	0	0	0	3		2	2
28	2	2	3	2	2	1	3	2	3	3	3	3	4	4	3	3	4	2	2	0	0	0	0	0	0	0	0	0	0	0	0	0	1	2	2	3
21	4	3	2	3	4	4	3	3	4	4	4	4	4	4	4	4	4	4	4	0	0	0	0	0	0	0	0	0	0	0	0	0	2	1		2
18	4	4	4	4	4	4	4	4	4	4	4	4	4	4	4	4	4	4	4	0	0	0	0	0	0	0	0	0	0	0	0	0	3	5	3	2
25	0	0	0	0	0	0	0	0	0	0	0	0	0	0	0	0	0	0	0	3	3	0	0	0	0	0	0	0	0	0	0	0	3	1		2
24	4	4	4	4	4	4	4	4	4	4	4	4	4	3	4	4	4	4	4	0	0	0	0	0	0	0	0	0	0	0	0	0	1	1	1	1
22	3	2	3	2	4	4	4	4	4	4	4	4	2	4	4	4	4	4	4	0	0	0	0	0	0	0	0	0	0	0	0	0	3	4	2	3
34	3	4	3	2	3	3	3	2	4	3	2	1	2	3	3	3	2	2	3	0	0	0	0	0	0	0	0	0	0	0	0	0	2	4	2	1
35	0	0	0	0	0	0	0	0	0	0	0	0	0	0	0	0	0	0	0	0	0	0	0	0	0	0	0	0	0	0	0	0	3	2	2	2
29	4	4	4	3	4	4	4	4	4	4	4	4	4	4	4	4	4	3	4	2	1	0	0	0	0	0	0	0	0	0	0	0	3	4	3	2
21	1	2	2	1	2	2	1	2	3	1	1	1	2	1	2	2	2	2	3	1	1	0	2	1	1	0	0	0	0	0	0	0	3	4	1	2
34	2	2	3	1	3	3	3	3	3	3	2	2	3	2	3	3	3	3	4	1	1	2	0	0	0	0	0	0	0	0	0	0	2	1		4
20	1	2	2	2	2	3	2	1	4	3	1	1	2	2	1	1	2	2	2	0	0	2	0	0	0	0	0	0	0	0	0	0	3	2	2	2
20	1	1	3	2	3	3	2	2	3	3	3	2	3	3	3	3	3	1	3	0	1	0	0	1	1	0	0	0	0	0	0	0	3	4	2	3
24	3	4	3	1	4	3	2	3	4	3	4	3	3	3	2	2	3	3	3	3	2	3	2	0	0	0	0	0	0	0	0	0	3	4	3	3
22	4	2	3	4	4	4	3	4	3	3	4	2	4	4	3	3	4	4	4	2	1	0	0	0	0	0	0	0	0	0	0	0	3	4	2	2
21	3	2	2	4	4	2	2	2	3	2	1	2	2	1	2	2	2	2	2	0	0	0	0	0	0	0	0	0	0	0	0	0	3	1	2	3
28	4	4	4	2	4	4	3	4	4	4	4	4	4	4	4	3	4	3	4	1	0	0	0	0	0	0	0	0	0	0	0	0	3	2	3	4
25	1	2	0	4	4	4	1	2	4	2	4	4	2	3	3	0	0	2	4	0	0	0	3	0	0	0	0	0	0	0	0	0		4	3	4
16	4	3	4	3	3	3	2	3	3	3	3	2	2	3	3	3	2	2	3	0	0	0	0	0	0	0	0	0	0	0	0	0	3	2	3	3
26	1	2	3	4	3	2	2	2	3	3	2	2	1	1	1	1	2	2	4	0	0	0	0	0	0	0	0	0	0	0	0	0	2	2	2	2
32	2	2	1	1	2	2	2	0	2	2	2	2	2	2	1	1	2	1	1	3	1	0	1	2	1	1	0	0	0	0	0	0	3	1	1	2
21	4	2	4	4	4	4	4	4	4	4	4	4	4	4	4	4	4	4	4	0	0	0	0	0	0	0	0	0	0	0	0	0	2	1	2	2
18	1	0	0	2	4	4	2	2	4	4	3	1	3	3	3	2	3	2	4	0	1	0	1	1	0	0	0	0	0	0	0	0			1	1
22	4	3	4	1	4	3	2	3	4	4	4	3	4	4	4	3	4	4	4	0	0	0	0	0	0	0	0	0	0	0	0	0	3	1	2	2
31	4	4	4	4	4	4	4	4	4	4	4	4	4	4	4	4	4	4	4	0	0	0	0	0	0	0	0	0	0	0	0	0	2	2	2	3
20	4	4	4	3	4	4	3	4	4	4	4	4	4	4	4	4	4	4	4	0	0	0	0	0	0	0	0	0	0	0	0	0	3	2	2	2
31	2	2	3	1	1	2	2	1	2	1	0	2	1	2	1	1	1	2	1	0	0	0	0	0	0	0	0	0	0	0	0	0	2	1	2	2
29	1	4	1	3	4	4	3	2	4	3	4	3	4	3	2	2	4	2	4	2	1	2	0	1	1	1	0	0	0	0	0	0	2	2	1	2
24	3	3	3	3	3	3	3	2	2	3	2	2	3	2	2	2	2	2	2	2	0	0	0	0	0	0	0	0	0	0	0	0	4	2	1	2
24	4	4	4	0	4	4	4	4	4	4	4	4	4	4	4	4	4	4	4	0	0	0	0	0	0	0	0	0	0	0	0	0	3	3	2	2
29	4	4	3	3	4	4	4	4	4	4	4	3	4	4	4	4	4	4	4	0	0	0	0	0	0	0	0	0	0	0	0	0	3	1	2	2
35	4	4	4	3	4	3	3	3	3	3	4	2	3	3	3	1	3	3	4	1	0	0	0	0	0	0	0	0	0	0	0	0
19	1	3	4	4	2	4	4	3	4	2	4	3	3	3	3	4	3	4	4	1	1	0	0	0	0	0	0	0	0	0	0	0	3	1		2
29	2	1	2	2	2	1	2	2	2	1	2	1	1	2	1	2	2	2	2	1	1	0	1	0	0	0	0	0	0	0	0	0	2	2	2	3
15	4	4	4	4	4	3	4	4	3	3	4	4	2	3	3	4	3	2	3	0	0	0	0	0	0	0	0	0	0	0	0	0	1	2	2
24	0	0	0	0	2	4	0	0	2	2	4	0	0	4	0	0	0	0	4	0	0	0	0	0	0	0	0	0	0	0	0	0	3	2	3	3
31	0	1	1	1	4	3	2	3	3	2	2	2	2	2	3	2	2	2	3	0	0	0	0	0	0	0	0	0	0	0	0	0	3	4	2	3
22	4	4	4	4	4	4	4	4	4	4	4	4	4	4	4	4	4	3	4	0	0	0	0	0	0	0	0	0	0	0	0	0	3	1	2	4
30	1	4	4	4	4	4	4	4	4	4	4	3	4	4	4	4	4	4	4	0	0	0	0	0	0	0	0	0	0	0	0	0	3	2	2	2
28	2	2	2	1	2	2	3	3	2	2	1	2	2	2	2	2	3	2	3	0	0	0	0	0	0	0	0	0	0	0	0	0	4	1	3	3
32	1	3	2	1	2	2	2	2	2	2	0	0	1	0	0	2	2	1	2	2	1	2	0	0	0	0	0	0	0	0	0	0	3	1	2	2
22	2	2	3	1	2	2	2	2	2	1	1	2	2	2	2	2	2	1	2	2	1	0	0	0	1	0	0	0	0	0	0	0	3	4	2	3
28	4	4	4	3	4	4	4	4	4	4	4	4	4	3	4	4	4	3	4	0	0	0	0	0	0	0	0	0	0	0	0	0	4	6	3	4
38	2	4	4	4	4	4	4	4	4	4	4	4	4	1	1	4	4	4	2	0	0	0	0	0	0	0	0	0	0	0	0	0	3	2	3	2
28	4	4	4	3	4	4	4	4	4	4	4	4	4	3	4	4	4	4	4	0	0	0	0	0	0	0	0	0	0	0	0	0	3	2	2	3
29	4	4	4	4	4	4	4	4	4	4	4	4	4	4	4	4	4	4	4	0	0	0	0	0	0	0	0	0	0	0	0	0	3	4	3	4
19	4	4	3	2	4	4	3	3	4	4	4	2	4	4	3	2	4	3	4	2	1	0	0	0	0	0	0	0	0	0	0	0	3	2	2	3
21	1	3	3	1	4	1	4	4	3	1	2	2	2	2	3	3	1	2	4	0	0	0	0	0	0	0	0	0	0	0	0	0	3	1	2	2
29	1	3	4	4	4	2	2	4	4	4	2	3	2	1	3	3	4	3	4	0	0	0	0	0	0	0	0	0	0	0	0	0	2	4	2
25	4	3	4	4	4	4	4	4	4	4	4	4	4	2	4	4	4	4	4	0	0	0	0	0	0	0	0	0	0	0	0	0	3	1	2	2
30	4	4	4	4	4	4	4	4	4	4	4	4	4	4	4	4	4	4	4	0	0	0	0	0	0	0	0	0	0	0	0	0	2	2	2	2
32	3	4	4	4	1	4	2	3	1	1	4	1	3	3	1	3	2	2	2	1	1	0	0	0	0	0	0	0	0	0	0	0	2	2	2	2
26	4	4	4	3	4	4	4	4	4	3	2	2	3	3	4	4	4	3	4	0	0	0	0	0	0	0	0	0	0	0	0	0	2	1	2	2
33	4	4	4	3	4	4	4	4	4	4	4	4	4	4	4	4	4	4	4	0	1	0	0	0	0	0	0	0	0	0	0	0	1	2	2	1
17	4	4	4	4	4	4	3	3	4	3	4	4	3	4	3	4	4	3	4	0	1	0	0	0	0	0	0	0	0	0	0	0	3	2	2	2
17	3	4	4	4	4	4	4	4	4	4	4	4	4	4	4	4	4	4	4	0	0	0	0	0	0	0	0	0	0	0	0	0	3	2	1	2
27	2	3	3	0	4	4	3	4	4	4	3	3	4	4	4	3	4	3	4	0	0	0	0	0	0	0	0	0	0	0	0	0	3	1	3	3
21	4	4	4	4	4	4	4	4	3	3	4	3	4	4	3	3	4	4	4	0	0	0	0	0	0	0	0	0	0	0	0	0	3	1	2	2
29	3	4	4	4	4	4	4	4	4	4	4	4	4	4	4	4	4	4	4	2	2	0	0	0	0	0	0	0	0	0	0	0	3	2	2	2
17	3	1	4	2	1	3	1	1	1	1	1	1	2	1	1	0	1	1	2	2	1	1	0	0	1	0	1	0	0	0	0	0	2	1	2	3
23	3	2	4	3	3	3	2	2	3	2	3	3	2	3	1	2	3	2	3	0	0	0	0	0	0	0	0	0	0	0	0	0	3	1	1	2
18	2	1	1	1	2	4	2	2	4	2	0	1	1	1	1	1	2	2	4	1	0	1	0	0	1	0	0	0	0	0	0	0	3	3	1	2
20	4	2	2	1	4	2	2	0	2	2	4	2	2	2	2	2	2	1	2	0	0	0	0	0	0	0	0	0	0	0	0	0	2		1	2
26	3	2	2	2	2	3	3	2	2	2	0	2	2	2	1	2	2	2		0	0	0	0	0	0	0	0	0	0	0	0	0	3	1	2	3
18	3	3	1	2	4	2	2	1	3	2	0	2	2	2	1	3	3	1	4	0	0	0	0	0	0	0	0	0	0	0	0	0	3	2	2	4
23	0	3	1	1	3	4	2	1	3	3	1	1	2	1	0	0	2	1	2	0	0	0	0	0	0	0	0	0	0	0	0	0	3	2	2	3
28	4	3	4	4	4	4	3	2	4	4	4	3	4	4	2	3	4	4	4	1	1	0	0	0	0	0	0	0	0	0	0	0	3	2	2	2
24	3	2	4	4	3	2	2	2	1	1	2	1	2	2	1	2	2	2	1	3	3	3	3	1	0	0	0	0	3	0	0	0	3	2		4
24	3	3	3	3	4	2	3	2	4	3	3	3	3	3	2	3	3	3	4	1	2	0	0	1	0	0	0	0	0	0	0	0	3	4		4
35	4	2	2	2	2	1	1	1	1	1	3	1	1	3	1	1	1	1	2	1	1	0	0	0	0	0	0	0	0	0	0	0	2		1	2
20	2	2	2	2	3	2	2	2	2	2	3	2	2	3	2	2	2	2	3	1	1	1	0	0	0	0	0	0	0	0	0	0	3	5	3	2
23	3	2	2	4	4	3	3	3	4	3	3	3	4	3	3	3	3	3	4	0	0	0	0	0	0	0	0	0	0	0	0	0	3	2	2	2
19	1	1	1	2	4	3	1	1	4	2	3	3	3	3	3	3	4	3	4	0	0	0	0	0	0	0	0	0	0	0	0	0	3	1		2
18	4	4	4	4	4	4	4	4	4	4	4	4	4	4	4	4	4	4	4	1	0	2	0	0	0	0	0	0	0	0	0	0	3		2	2
25	4	4	3	4	4	4	3	4	4	3	4	3	3	4	4	3	3	3	4	2	0	0	0	0	0	0	0	0	0	0	0	0	3	2	3	2
27	4	4	4	4	4	4	4	4	4	4	4	4	4	4	4	4	4	4	4	0	0	0	0	0	0	0	0	0	0	0	0	0	3	2	3	2
25	2	4	4	3	3	2	3	3	1	2	1	3	3	1	3	3	2	3	2	0	0	0	0	0	0	0	0	0	0	0	0	0	3	5	2	2
20	3	3	4	4	4	2	3	3	1	2	2	3	2	2	2	3	2	3	3	2	2	0	0	0	0	0	0	0	0	0	0	0	3	4	3	2
24	3	2	2	3	3	3	3	3	2	2	3	2	2	2	2	2	2	2	2	1	1	0	0	0	0	0	0	0	0	0	0	0	3	2	2	2
22	4	3	4	3	3	4	4	3	4	3	4	3	3	3	4	3	4	3	4	2	0	1	0	0	0	0	0	0	0	0	0	0	3	3	3	3
23	4	4	4	4	4	4	4	4	4	4	4	4	4	4	4	4	4	4	4	0	0	0	1	0	0	0	0	0	0	0	0	0	3	2	2	3
16	1	1	2	4	2	4	4	3	4	2	0	3	3	3	3	3	3	2	2	0	0	0	0	0	0	0	0	0	0	0	0	0	2	2	3	4
20	1	3	3	1	4	4	3	3	3	3	3	3	3	3	3	3	3	3	3	0	0	0	0	0	0	0	0	0	0	0	0	0	3	4	1	2
25	3	4	4	3	3	2	4	4	1	1	3	4	3	3	3	4	3	3	4	1	2	0	0	0	0	0	0	0	0	0	0	0	3	4	1	2
21	4	3	4	4	4	4	4	3	4	4	3	4	4	3	4	4	4	4	4	2	0	0	0	0	0	0	0	0	0	0	0	0	3	1	1	2
22	4	2	2	4	4	4	4	4	4	4	2	1	3	3	4	4	4	4	4	3	3	3	3	2	3	3	3	3	3	0	0	0	3	2	3	4
26	1	2	2	1	2	3	3	3	3	3	3	3	3	4	4	3	4	4	4	1	1	0	0	0	1	0	0	0	0	0	0	0	4	4	3	4
23	2	2	1	2	3	3	2	2	3	2	2	2	3	2	1	1	3	2	2	0	0	0	0	0	0	0	0	0	0	0	0	0	3	2	2	3
20	1	3	3	4	4	4	3	4	4	3	4	4	3	4	4	3	4	3	4	0	0	0	0	0	0	0	0	0	0	0	0	0	3	2	3	3
16	1	4	4	4	4	4	4	4	4	4	3	3	4		4	4	4	4	4	1	0	0	2	0	0	0	0	0	0	0	0	0	2	2	2
19	4	4	4	4	4	4	4	4	4	4	4	4	4	4	4	4	4	4	4	0	0	0	0	0	0	0	0	0	0	0	0	0	3	3	2	2
29	1	1	2	0	2	2	1	2	2	2	1	2	2	1	2	1	1	2	2	0	0	0	0	0	0	0	0	0	0	0	0	0	1	1	2	3
18	4	4	4	4	4	2	4	4	4	2	4	4	2	4	4	4	4	4	4	1	0	0	0	1	1	0	0	0	0	0	0	0	3
28	4	2	4	2	4	3	4	4	4	2	4	4	4	3	4	2	2	1	3	3	2	0	0	0	0	0	0	0	0	0	0	0	3	2	2	3
20	3	3	3	4	4	4	4	4	4	4	4	3	4	4	4	4	4	4	4	0	0	0	0	0	0	0	0	0	0	0	0	0	3	4	2	2
25	4	4	4	4	4	4	4	4	4	4	4	4	4	4	4	4	4	3	4	2	0	0	0	0	0	0	0	0	0	0	0	0	3	2	2	3
16	1	4	3	4	4	4	4	4	4	3	3	4	4	4	4	4	4	4	4	2	1	3	0	0	0	0	0	0	0	0	0	0	2			2
23	0	2	2	1	4	4	2	4	4	4	2	4	4	4	2	3	4	3	3	0	0	0	0	0	0	0	0	0	0	0	0	0	3	3	2	2
28	2	3	0	3	4	3	3	3	4	4	3	4	3	4	3	3	3	2	4	0	0	0	0	0	0	0	0	0	0	0	0	0	3	2	2	1
39	1	1	1	4	4	1	1	1	4	1	3	3	3	3	3	3	3	1	2	1	0	0	1	0	1	0	0	0	0	0	0	0	4	6	3	4
25	1	0	0	0	1	1	3	1	0	0	0	0	1	1	0	0	2	2	2	0	0	0	1	0	0	0	0	0	0	0	0	0	2	2	2	4
29	3	4		3	4	3	3	3	4	3	2	2	3	2	3	3	4	3	4	0	0	0	0	0	0	0	0	0	0	0	0	0	3	1	2	2
36	1	2	4	4		3	3	3	3	3	3	3	3	1	3	3	3	3	4	1	0	0	0	0	0	0	0	0	0	0	0	0	3	2	3	2
35	2	3	2	1	3	3	2	2	3	3	2	2	2	2	3	2	3	3	3	0	0	0	0	0	0	0	0	0	0	0	0	0	4	2	3	4
31	2	3	3	1	2	3	1	3	3	2	1	2	2	1	1	1	1	1	2	2	2	1	0	0	0	0	0	0	0	0	0	0	3	3	2	4
22	0	4	4	4	4	4	4	4	4	4	4	4	4	4	4	4	4	4	4	0	0	0	0	0	0	0	0	0	0	0	0	0	3	2	2	3
23	1	1	4	4	4	2	3	4	3	2	2	4	2	0	4	4	3	3	4	0	1	0	0	0	0	0	0	0	0	0	0	0	3	1	1	2
17	4	4	4	4	2	1	2	0	1	0	4	4	4	1	4	4	4	4	4	3	3	3	3	0	0	0	0	0	0	0	0	0	2	2	2
21	4	2	2	4	4	4	2	4	4	2	2	4	4	4	2	4	2	2	4	0	0	0	0	0	0	0	0	0	0	0	0	0	2	1		2
34	4	3	2	4	4	4	4	2	4	2	4	2	4	4	2	2	4	4	4	0	0	0	0	0	0	0	0	0	0	0	0	0	3	2		3
20	0	4	3	3	3	3	3	3	4	4	2	3	4	3	3	3	3	3	4	0	0	0	0	0	0	0	0	0	0	0	0	0	3	2	2	2
24	1	4	0	4	4	3	3	4	4	3	0	3	2	0	4	4	3	4	2	0	0	0	0	0	0	0	0	0	0	0	0	0	2	2	2	2
22	4	4	3	4	4	4	3	4	4	4	4	3	4	4	4	4	4	4	4	0	0	0	0	0	0	0	0	0	0	0	0	0	3	2	3	4
28	4	3	4	3	4	3	3	3	4	4	4	2	2	4	3	4	3	2	3	0	0	0	0	0	0	0	0	0	0	0	0	0	3	3	2	3
24	4	4	4	4	4	4	4	4	4	4	4	4	4	4	4	4	4	4	4	0	0	0	0	0	0	0	0	0	0	0	0	0	2	1		3
22	1		3	4	2	2	1	3	4	3	2	2	3	3	4	2	3	3	4	1	0	1	1	0	1	0	0	0	0	0	0	0	3	2		4
28	0	2	1	1	4	1	1	2	2	2	2	4	4	3	3	2	4	3	3	3	2	1	3	0	0	2	0	0	0	1	2	2	2	1	2	2
26	2	2	1	2	4	3	2	2	3	4	1	2	2	2	1	2	2	1	3	1	2	0	0	0	0	0	0	0	0	0	0	0	3	2	2	4
19	2	1	2	1	1	3	2	2	1	2	2	1	2	2	2	1	2	1	2	3	3	3	3	0	0	0	0	0	3	0	0	0	3	2	1	2
24	1	1	4	4	4	4	4	4	4	4	4	4	4	2	4	4	4	4	4	0	1	0	0	0	0	0	0	0	0	0	0	0	4	3	2	2
29	4	4	4	4	4	4	3	4	4	4	4	3	4	3	4	3	4	3	4	0	0	0	0	0	0	0	0	0	0	0	0	0	3	1	2	2
23	4	4	4	3	4	4	4	4	4	4	3	4	4	4	4	4	4	4	4	0	0	0	0	0	0	0	0	0	0	0	0	0	4	5	3	3
23	2	2	3	2	2	3	2	1	1	1	3	2	2	3	2	1	1	2	2	0	0	1	0	0	0	0	0	0	0	0	0	0	3	1	2	2
30	4	3	3	4	4	4	3	3	4	2	3	3	3	4	3	3	3	3	4	1	0	0	0	0	0	0	0	0	0	0	0	0	4	2	3	4
36	0	2	1	0	4	3	2	2	2	2	2	1	1	2	1	2	4	2	4	0	0	0	0	0	0	0	0	0	0	0	0	0	3	4	3	3
21	4	4	4	2	4	4	2	4	4	2	2	2	2		4	2	4	4	4	0	0	0	0	0	0	0	0	0	0	0	0	0	2	2		2
25	2	3	2	3	2	3	4	3	4	4	1	2	3	1	1	2	3	3	4	0	1	0	1	0	0	0	0	0	0	0	0	0	3	1	2	2
23	4	2	4	2	3	4	3	3	2	2	4	3	2	4	2	2	3	2	2	3	0	3	2	2	2	1	2	0	0	0	0	0	3	2	2
31	4	4	4	4	4	4	4	4	4	4	3	3	3	3	3	3	3	3	4														3	2	2	3
24	2	3	4	1	3	1	2	3	2	1	3	2	4	3	2	2	2	1	4	0	0	0	0	0	0	0	0	0	0	0	0	0	2	1		2
27	4	4	4	4	4	4	4	4	4	4	4	4	4	4	4	4	4	4	4	0	0	0	0	0	0	0	0	0	0	0	0	0	4	4	2	4
29	3	3	4	3	4	3	3	4	3	3	2	3	4	4	3	4	4	4	4	0	0	0	0	0	0	0	0	0	0	0	0	0	3	2	3	4
24	2	1	1	1	2	3	2	2	3	1	2	2	2	2	1	1	3	2	4	0	0	0	0	0	0	0	0	0	0	0	0	0	3	4	2	4
20	0	0	0	0	0	0	0	0	1	0	2	2	2	0	2	2	0	0	2	0	0	0	0	0	0	0	0	0	0	0	0	0	2	1	2	3
28	0	0	1	0	0	0	0	0	0	0	0	0	0	0	0	0	0	0	0	0	0	0	0	0	0	0	0	0	0	0	0	0	1	2	2	2
23	0	2	3	4	4	4	4	4	4	4	4	4	4	4	4	4	2	4	4	0	1	3	2	0	0	0	0	0	0	0	0	0	3		2	2
24	0	4	3	0	4	1	1	3	4	0	1	2	1	2	2	1	1	1	3	0	0	0	0	0	0	0	0	0	0	0	0	0	3	4	1	3
20	0	1	1	0	1	1	2	2	2	2	1	2	2	1	1	2	2	2	2	0	0	0	0	0	0	0	0	0	0	0	0	0	3	3	2	2
18	4	4	4	4	4	4	4	4	4	4	4	4	4	4	4	4	4	4	4	0	0	0	0	0	0	0	0	0	0	0	0	0	2	1	3
33	0		2	3	3	3	2	2	2	3	3	2	2	2	2	2	2	3	3	0	0	0	0	0	0	0	0	0	0	0	0	0	1	2	2	2
28	3	2	3	2	4	3	4	2	4	4	4	3	4	2	2	3	3	3	4	0	0	1	1	0	0	0	0	0	0	0	0	0	3	1	1	3
31	1	1	2	1	1	2	2	1	0	1	3	1	2	1	0	1	2	0	1	2	0	0	0	0	0	0	0	0	0	0	0	0	3	2	3	3
27	2	2	2	1	4	4	1	1	4	4	4	4	4		4	1	4	4	4	0	0	0	0	0	0	0	0	0	0	0	0	0	3	3	3	3
38	3	2	3	2	3	1	2	1	1	1	1	2	1	1	1	1	2	1	1	0	0	0	0	0	0	0	0	0	0	0	0	0	4	2	3	3
20	0	1	2	2	2	2	2	2	2	3	3	2	3	3	3	2	2	2	3	0	0	0	0	0	0	0	0	0	0	0	0	0	3	2	2	4
21	0	3	3	3	4	4	3	3	3	3	2	3	3	1	3	3	3	3	3	2	1	0	0	0	0	0	0	0	0	0	0	0	4	2	3	4
17	2	2	2	2	2	2	2	2	1	0	0	0	0	0	0	2	2	2	2	1	1	0	0	0	0	0	0	0	0	0	0	0	3	2	2	3
22	4	4	3	4	4	3	4	3	3	4	3	4	3	4	3	2	2	2	2	0	0	0	0	0	0	0	0	0	0	0	0	0	3	1	2	2
38	1	3	0	2	2	4	2	1	4	4	4	2	2	4	2	2	3	2	4	1	0	0	0	0	0	0	0	0	0	0	0	0	2	1	2	2
25	0	0	0	2	4	4	2	2	4	4	0	2	2	4	4	4	4	4	4	0	0	0	0	0	0	0	0	0	0	0	0	0	3	2	2	2
30	4	1	2	4	4	4	4	4	4	4	4	4	4	4	4	4	4	3	4	0	0	0	0	0	0	0	0	0	0	0	0	0	2	2	2	3
20	0	0	0	2	3	2	2	2	3	4	2	3	2	4	4	3	2	4	2	0	0	0	0	0	0	0	0	0	0	0	0	0	1		2	2
18	1	1	0	2	4	4	1	1	4	4	0	2	2	3	1	2	1	2	4	0	0	0	0	0	0	0	0	0	0	0	0	0	2	2	3
22	2	1	2	4	4	4	3	2	2	3	0	1	2	2	4	3	4	2	4	2	2	1	0	0	0	0	0	0	0	0	0	0	3	2	2	3
22	2	4	4	2	4	4	2	2	4	4	1	2	1	2	4	1	4	1	4	0	0	0	0	0	0	0	0	0	0	0	0	0	3	2	2	3
15	4	4	4	4	4	4	4	4	4	4	4	4	4	4	4	4	4	3	4	0	0	0	0	0	0	0	0	0	0	0	0	0	2	4	2	2
35	0	1	1	1	1	2	1	2	1	1	1	1	1	0	1	1	2	2	1	1	1	0	0	0	0	0	0	0	0	0	0	0	3	3	3	3
28	4	3	2	2	3	3	2	3	4	4	4	3	3	4	2	2	4	3	4	3	3	0	0	0	0	0	0	0	0	0	0	0	3	2	3	2
25	0	1	1	1	4	4	4	4	4	4	3	4	4	2	1	2	4	4	4	0	0	0	0	0	0	0	0	0	0	0	0	0	3	2	2	2
34	1	3	3	3	4	3	2	2	3	1	3	3	2	2	2	1	3	3	4	0	0	1	0	0	0	0	0	0	0	0	0	0	3	1	3	4
33	1	2	2	4	4	3	3	4	3	4	4	2	3	4	4	3	3	2	4	1	0	0	0	0	0	0	0	0	0	0	0	0	3	2	2	2
25	3	3	4	2	2	4	3	4	0	0	4	4	4	3	3	4	3	3	4	3	3	3	1	0	0	0	0	0	0	0	0	0	3	1	2	2
28	2	1	2	1	3	3	2	1	3	2	1	1	3	1	1	1	2	2	4	1	0	0	0	0	0	0	0	0	0	0	0	0	3	1	2	3
22	4	4	4	4	4	4	4	4	4	4	4	4	4	4	4	4	4	4	4	0	0	0	0	0	0	0	0	0	0	0	0	0	3	1	1	3
18	0	0	4	0	1	1	0	0	2	1	1	0	0	1	0	0	0	0	2	0	0	0	0	0	0	0	0	0	0	0	0	0	3	1		2
99	2	3	4	4	4	4	4	3	4	4	4	4	4	4	3	4	4	3	4	0	0	0	0	0	0	0	0	0	0	0	0	0
24	1	2	1	2	0	2	1	1	1	1	1	2	1	1	1	1	1	1	3	1	0	0	0	0	0	0	0	0	0	0	0	0	3	2	3	4
23	3	1	4	2	2	2	2	4	3	2	2	3	2	2	3	3	2	3	2	2	2	2	2	0	0	0	0	0	0	0	0	0	3	1	2	4
29	4	4	4	4	4	4	4	4	4	4	4	4	4	4	4	4	4	4	4	0	0	0	0	0	0	0	0	0	0	0	0	0	3	2	2	2
43	2	3	3	1	3	1	3	2	3	1	3	2	1	3	2	2	2	1	3	1	0	0	0	0	0	0	0	0	0	0	0	0	3	1	2	3
20	1	1	2	1	3	4	1	1	1	1	1	1	2	1	1	1	1	2	3	0	0	0	0	0	0	0	0	0	0	0	0	0	3	2	1	2
29	1	2	1	2	2	1	2	2	1	2	2	2	2	1	2	1	2	2	2	1	0	1	0	0	0	0	0	0	0	0	0	0	3	2		4
29	0	0	1	0	4	4	0	0	4	0	4	2	1	0	0	0	4	4	3	0	0	0	0	0	0	0	0	0	0	0	0	0	3	4	2	4
20	4	4	4	4	4	4	4	4	4	4	4	4	4	4	4	4	4	4	4	0	0	0	0	0	0	0	0	0	0	0	0	0	3	1	2	3
26	1	4	2	1	2	3	2	2	1	1	1	1	2	1	2	1	3	2	3	1	1	0	0	0	0	0	0	0	0	0	0	0	2	2	2	2
17	4	4	4	4	4	4	3	4	4	4	4	4	3	4	3	4	4	4	3	0	0	0	0	0	0	0	0	0	0	0	0	0	1	2	2	2
32	4	1	2	2	4	4	2	2	4	4	4	2	4	4	4	4	4	4	4	2	2	2	0	0	0	0	0	0	0	0	0	0	2	2	2	3
16	0	2	4	4	4	4	0	4	4	4	3	4	4		4	4	4	4	4	0	2	0	0	0	0	0	0	0	0	0	0	0	2	2	2	2
24	4	4	4	4	4	3	4	4	4	4	4	4	4	4	4	4	4	4	4	0	0	0	0	0	0	0	0	0	0	0	0	0	2	1	3	2
22	4	4	4	4	4	4	4	4	4	4	4	4	4	4	4	4	4	4	4	0	0	0	0	0	0	0	0	0	0	0	0	0	3	2	2	2
28	4	0	4	4	2	4	4	2	0	4	4	2	4	4	4	4	4	4	0	2	0	0	0	0	0	0	0	0	0	0	0	0	2		2	2
28	1	2	2	1	2	2	2	2	2	2	4	2	2	2	1	2	2	2	3	2	2	1	1	0	0	0	0	0	0	0	0	0	3	4	2	3
22	2	2	4	2	4	4	4	4	4	4	2	2	2	4	4	4	4	4	4	0	0	0	0	0	0	0	0	0	0	0	0	0	2	2	2	3
23	2	3	3	2	2	2	1	2	1	1	2	2	2	1	1	2	1	2	2	2	2	1	0	0	0	0	0	0	0	0	0	0	3	1	3	2
26	0	2	2	2		2	3	4	4	4	3	4	3	4	4	4		4	4	0	0	0	0	0	0	0	0	0	0	0	0	0	3	2	2	4
29	3	4	4	4	4	4	4	4	4	4	4	4	4	4	4	4	4	4	4	1	1	2	0	0	1	0	0	0	0	0	0	0	4	4	3	4
22	4	4	4	4	4	4	4	4	4	4	4	4	4	4	4	4	4	4	4	0	0	0	0	0	0	0	0	0	0	0	0	0	3	1	2	4
26	4	3	4	2	4	4	4	2	4	4	3	4	2	4	3	4	4	3	4	0	0	0	0	0	0	0	0	0	0	0	0	0	3	1	2	2
31	1	1	1	1	2	3	2	1	3	3	2	3	3	3	3	3	3	3	4	0	0	0	0	0	0	0	0	0	0	0	0	0	4	2	2	2
26	1	1	2	0	1	1	1	2	0	1	0	4	1	1	1	0	1	1	1	3	3	1	1	0	0	0	0	0	0	0	0	0	3
29	4	4	3	3	3	4	2	3	3	3	4	3	3	4	4	4	3	4	4	1	1	0	0	0	0	0	0	0	0	0	0	0	2	2	1	2
25	0	0	0	1	4	4	2	1	4	2	1	1	0	0	1	0	1	2	4	0	0	0	0	0	0	0	0	0	0	0	0	0	3	1	2	2
26	4	2	2	3	4	4	3	3	4	4	4	3	2	4	2	3	4	2	4	1	0	0	0	0	0	0	0	0	0	0	0	0	4	3	3	4
28	2	2	2	1	4	4	2	2	4	4	2	2	4	2	2	4	4	3	4	0	0	0	0	0	0	0	0	0	0	0	0	0	3	5	3	4
32	4	4	4	4	4	3	3	4	3	3	4	3	3	4	3	3	3	3	4	0	1	1	0	0	0	0	0	0	0	0	0	0	2			2
24	1	1	0	1	1	1	2	0	2	2	0	0	1	0	2	2	2	0	0	0	0	0	0	0	0	0	0	0	0	0	0	0	2	2	3	3
33	3	3	4	3	4	3	3	4	3	3	3	4	3	4	4	4	3	4	3	2	2	2	0	1	1	0	0	0	0	0	0	0	4	2	2	3
33	4	4	4	4	4	4	4	4	4	4	4	4	4	4	4	4	4	4	4	0	0	0	0	0	0	0	0	0	0	0	0	0	3	3	3	4
16	3	4	3	3	4	3	2	4	4	3	3	3	4	3	2	2	3	4	4	0	0	0	0	0	0	0	0	0	0	0	0	0	3			2
22	3	4	4	4	4	4	3	4	4	3	3	4	2	2	2	2	4	2	4	0	0	0	0	0	0	0	0	0	0	0	0	0	3	2	2	2
24	4	3	4	1	1	1	3	1	1	2	2	2	3	1	2	2	1	1	1	3	2	0	0	2	1	0	0	0	0	0	0	0	2	2	2	3
17	4	4	4	4	4	3	4	4	4	4	4	3	4	4	3	4	4	3	4	0	0	0	0	0	0	0	0	0	0	0	0	0	2	2	3	4
32	3	3	3	2	3	3	3	3	3	3	3	3	3	3	3	3	3	3	3	0	0	0	0	0	0	0	0	0	0	0	0	0	3	5	3	4
20	4	2	2	2	3	2	2	2	3	2	1	2	2	2	2	2	2	2	2	1	1	0	0	0	0	0	0	0	0	0	0	0	3	1	1	2
24	2	3	3	4	4	3	3	3	4	2	2	3	2	2	1	3	3	3	4	2	1	2	1	0	0	0	0	0	0	0	0	0	3	2	2	2
35	2	1	2	1	4	4	4	3	2	1	0	3	2	2	2	2	2	2	2	0	0	0	0	0	0	0	0	0	0	0	0	0	1	2	2	2
21	1	2	3	4	4	4	4	3	4	2	4	3	2	4	4	4	2	3	3	2	1	2	2	3	0	0	2	3	0	2	2	0	3	1	2	3
32	3	4	4	4	4	4	4	4	4	4	4	4	4	4	4	4	4	4	4	2	1	0	0	0	0	0	0	0	0	0	0	0	2	1	2	2
21	2	2	3	2	2	2	2	2	2	2	2	2	2	2	2	2	2	2	2	2	0	2	0	0	0	0	0	0	0	0	0	0		2	2	2
27	2	2	2	2	3	2	2	2	4	2	2	2	2	2	2	2	2	2	3	0	0	0	0	0	0	0	0	0	0	0	0	0		1	1	2
22	2	3	4	1	2	4	2	2	1	1	3	2	2	2	2	3	3	3	3	1	0	1	1	0	0	0	0	0	0	0	0	0	3	2	2	2
35	4	4	4	4	4	4	4	4	4	4	4	4	4	4	4	4	0	4	4	0	0	0	0	0	0	0	0	0	0	0	0	0	2	2	2	4
29	4	2	2	4	4	4	3	3	4	4	4	3	4	4	3	2	4	3	4	2	0	1	2	0	0	0	0	0	0	0	0	0	3	2	2	4
17	4	4	4	4	4	4	4	4	4	4	4	4	4	4	3	4	4	4	4	0	0	0	0	0	0	0	0	0	0	0	0	0	2	2	2
21	4	3	2	4	4	2	2	2	4	1	1	2	2	3	3	2	4	2	4	0	0	0	0	0	0	0	0	0	0	0	0	0	3	1	2	4
30	1	2	4	4	4	4	4	4	4	4	2	4	4	4	4	4	4	4	4	3	2	3	0	0	0	0	0	0	0	0	0	0	2	2	2	2
24	1	1	2	2	2	2	2	2	3	2	3	2	2	3	2	2	2	2	2	2	0	0	0	0	0	0	0	0	0	0	0	0	3	2	3	2
18	4	4	3	4	4	4	3	4	4	3	4	3	4	4	3	3	4	3	4	0	0	0	0	0	0	0	0	0	0	0	0	0	3	5	3	4
23	1	1	4	2	4	2	1	3	4	2	1	2	2	1	2	2	4	2	3	0	0	0	0	0	0	0	0	0	0	0	0	0	3	2	1	2
23	0	0	0	0	0	0	0	0	0	0	0	0	0	0	0	0	0	0	0	0	0	0	0	0	0	0	0	0	0	0	0	0	2	1	2	2
24	1	3	2	1	4	3	3	2	4	3	2	3	3	2	2	2	4	2	4	0	0	0	0	0	0	0	0	0	0	0	0	0	3	2	1	3
35	2	2	2	3	4	3	2	2	2	2	2	2	2	2	2	2	0	2	2	0	0	0	0	0	0	0	0	0	0	0	0	0	3	1	2
21	4	4	4	4	4	4	4	4	4	4	4	4	4	4	4	4	4	4	4	0	0	0	0	0	0	0	0	0	0	0	0	0	3	1		2
24	0	2	1	0	4	4	1	2	4	4	4	4	4	4	2	4	4	4	4	0	0	0	1	1	0	1	0	0	0	0	0	0	3	2	2	3
38	4	4	4	4	4	4	4	4	4	4	4	4	4	4	4	4	4	4	4	0	0	0	0	0	0	0	0	0	0	0	0	0	2	1	1	1
24	2	2	1	3	3	1	1	2	2	1	1	2	2	3	1	2	2	2	2	0	0	0	0	0	0	0	0	0	0	0	0	0	2	1	1	2
18	0	1		4	3	1	1	1	2	2	2	2	2	2	2	2	2	2	2	1	1	1	0	0	0	0	0	0	0	0	0	0	3	2	2	4
22	2	2	1	1	2	1	1	2	1	1	1	2	1	2	1	1	1	2	2	1	0	1	0	0	0	0	0	0	0	1	1	0	3	2	3	3
34	4	4	4	4	4	4	4	4	4	4	3	4	4	4	4	4	4	4	4	0	0	0	0	0	0	0	0	0	0	0	0	0	3	4	2	4
24	3	3	3	4	4	4	3	4	4	4	4	4	4	3	4	1	3		3	0	0	0	0	0	0	0	0	0	0	0	0	0	3	2	2	4
35	4	4	4	4	4	4	4	4	4	4	4	4	4	3	4	3	4	4	4	0	0	0	0	0	0	0	0	0	0	0	0	0	3	2	3	3
33	1	2	1	1	1	1	1	1	1	1	0	1	2	1	1	1	2	1	1	1	1	0	0	0	0	0	0	0	0	0	0	0	3	2	2	3
27	2	2	2	3	4	4	4	2	2	0	0	2	2	2	2	2	2	2	2	2	0	0	0	0	0	0	0	0	0	0	0	0	3	1	2	3
30	4	4	4	4	4	3	3	3	4	4	4	4	3	4	4	4	4	3	4	1	0	0	0	0	0	0	0	0	0	0	0	0	3	1	3	3
17	4	4	4	4	4	4	4	4	4	4	3	4	4	4	3	4	4	4	4	1	0	1	0	0	0	0	0	0	0	0	0	0	2	2	2	2
24	4	4	4	4	4	4	4	4	4	4	4	4	4	4	4	4	4	3	4	1	0	1	0	0	1	0	0	0	0	0	0	0	3	4	2	2
26	3	4	4	0	3	3	3	4	2	2	4	4	4	2	2	4	1	4	2	0	0	0	1	0	0	0	0	0	0	0	0	0	3	2	2	3
32	4	1	3	4	3	2	2	1	1	2	4	1	3	3	1	1	3	1	1	3	2	0	0	0	0	0	0	0	0	0	0	0	3	2	3	3
17	4	4	4	4	4	4	4	4	4	4	4	4	4	4	4	4	4	4	4	0	0	0	0	0	0	0	0	0	0	0	0	0	3	1	2	3
27	1	1	2	1	2	0	2	2	2	2	2	2	2	2	2	2	2	2	2	0	0	0	0	0	0	0	0	0	0	0	0	0	3	1	1	2
29	3	2	3	1	2	2	3	1	4	2	1	3	2	1	2	3	2	1	3	2	2	1	2	1	1	1	0	0	0	0	0	0	3	1	1	2
25	0	0	0	1	3	2	0	0	4	1	0			0	0		1	1	3	0	0	0	0	0	0	0	0	0	0	0	0	0	3	2	2	2
23	0	2	0	1	4	4	0	3	4	3	1	1	2	0	1	2	3	3	4	2	0	0	0	0	2	0	0	0	0	2	0	0	3	2	3	3
25	4	2	3	4	4	4	4	4	4	4	3	2	4	4	2	2	4	4	4	0	0	0	0	0	0	0	0	0	0	0	0	0	3	2	2	3
34	4	4	4	4	4	4	4	4	4	4	4	4	4	4	4	4	4	4	4	0	0	0	0	0	0	0	0	0	0	0	0	0	3	1	2	4
24	2	3	3	1	2	2	2	1	2	1	1	2	2	1	2	2	2	2	2	0	0	0	0	0	0	0	0	0	0	0	0	0	3	1	2	2
19	4	4	4	4	4	4	4	4	4	4	4	4	4	4	4	4	4	4	4	0	0	0	0	0	0	0	0	0	0	0	0	0	3	2	3	2
24	0	4	2	2	4	4	4	4	4	4	4	4	4	4	4	4	0	4	4	0	0	0	0	0	0	0	0	0	0	0	0	0	2	2	1	2
27	4	3	3	4	4	4	4	3	3	4	3	3	4	4	3	3	4	4	4	0	0	0	0	0	0	0	0	0	0	0	0	0	4	3	3	4
30	4	3	4	3	4	4	4	4	4	3	4	3	4	4	4	4	4	4	4	0	0	0	0	0	0	0	0	0	0	0	0	0	2	1	3	2
22	0	4	4	2	4	4	4	4	4	4	2	4	2	2	4	4	4	4	4	0	0	0	0	0	0	0	0	0	0	0	0	0	3	3	3	2
31	2	4	3	1	4	3	4	3	2	2	0	1	2	0	1	2	3	3	3	3	2	1	0	0	0	0	0	0	0	0	0	0	3	2	2	2
23	2	0	4	4	4	3	4	4	4	4	4	2	4	3	4	4	4	4	4	0	0	0	0	0	0	0	0	0	0	0	0	0	3	2	2	3
20	1	4	4	4	4	4	3	2	4	4	3	4	4	3	4	4	4	4	4	0	0	0	0	0	0	0	0	0	0	0	0	0	3	2	2	2
31	3	3	3	3	3	3	3	3	4	4	3	3	4	4	3	3	3	3	3	2	0	1	0	0	0	0	0	0	0	0	0	0	2	2	2	2
27	1	1	1	1	3	3	1	1	3	3	1	1	3	1	1	1	3	2	3	0	0	0	0	0	0	0	0	0	0	0	0	0	2	2	2	4
24	3	4	2	4	4	4	3	4	4	3	4	3	1	2	3	3	3	2	4	1	0	0	0	0	0	0	0	0	0	0	0	0	2	1	1	1
27	4	4	4	4	4	4	4	4	4	4	4	4	4	4	4	4	4	4	4	0	0	2	0	0	0	0	0	0	0	0	0	0	3	4	3	4
17	4	4	4	4	4	4	4	4	4	4	3	3	3	2	4	4	4	4	4	3	2	2	0	0	1	0	0	0	0	0	0	0	1		2	3
32	4	4	4	4	4	4	4	4	4	4	3	4	4	3	4	4	4	4	4	0	0	0	0	0	0	0	0	0	0	0	0	0	4	3	3	4
30	2	1	2	3	2	2	1	2	1	0	2	1	1	1	0	2	1	1	2	0	0	0	0	0	0	0	0	0	0	0	0	0	2	2	2	4
23	2	4	2	4	4	4	2	4	4	4	2	2	4	2	4	4	4	3	4	0	0	0	0	0	0	0	0	0	0	0	0	0		2	2	2
26	0	2	2	1		2	1	2	3	2	2	3	1	2	2	2	1	2	2	1	0	0	0	0	0	0	0	0	0	0	0	0	3	2	3	4
22	3	3	3	3	3	3	3	3	3	2	3	3	3	3	3	3	3	3	3	0	0	0	0	0	0	0	0	0	0	0	0	0	3	1	2	2
33	4	4	4	4	4	4	4	4	4	4	4	3	3	2	2	1	4	2	4	0	0	0	0	0	0	0	0	0	0	0	0	0	1	2	2	2
22	0	0	2	0	2	3	3	2	3	3	0	3	0	0	0	0	2	2	2	0		0	0	0	0	0	0	0	0	0	0	0	3	2	2	2
19	4	2	4	4	4	4	2	2	4	2	4	4	2	4	2	2	2	2	4	0	0	0	0	0	0	0	0	0	0	0	0	0	2	1	2	2
22	0	4	2	2	2	3	2	2	2	1	2	1		2	0	2	2	1	3	1	2	0	1	0	0	0	1	0	0	0	1	1	3		1	2
26	0	0	0	0	0	0	0	0	0	0	0	0	0	0	0	0	0	0	0	0	0	0	0	0	0	0	0	0	0	0	0	0	2	4	2	3
20	0	2	4	2	4	4	4	4	4	4	4	3	4	2	1	3	4	4	4	0	1	2	0	0	0	0	0	0	0	0	0	0	2	2	1	1
18	4	4	3	4	4	4	4	2	4	4	4	4	4	4	3	4	4	4	4	0	0	0	0	0	0	0	0	0	0	0	0	0	2	1	2	2
18	2	3	2	1	3	0	1	3	2	2	1	2	3	2	3	2	2	2	2	0	0	0	0	0	0	0	0	0	0	0	0	0	2	1	2	2
29	4	4	4	4	4	4	4	4	4	4	4	4	4	4	4	4	4	4	4	0	1	0	0	0	1	0	0	0	0	0	0	0	1	1	2	2
27	4	4	4	4	3	4	3	4	4	3	4	3	4	4	3	3	4	3	3	0	0	0	0	0	0	0	0	0	0	0	0	0	3	2	3	4
32	4	3	2	4	4	3	3	4	4	4	4	3	3	2	2	2	4	2	4		2	0	0	0	0	0	0	0	0	0	0	0	2	1	3	3
35	2	3	3	0	4	4	4	4	4	4	4	4	4	4	4	4	4	4	4	0	0	0	0	0	0	0	0	0	0	0	0	0	2	2	1	3
27	0	1	1	1	1	2	1	1	2	1	1	2	2	1	1	1	2	2	2	0	0	0	0	0	0	0	0	0	0	0	0	0	3		2
22	2	2	3	3	4	4	3	2	2	2	2	3	3	2	2	2	2	2	3	0	0	0	0	0	0	0	0	0	0	0	0	0	3	1	2	3
26	4	4	3	3	4	4	3	4	4	3	4	3	4	4	4	4	4	4	4	0	1	0	0	0	0	0	0	0	0	0	0	0	3	2	2	3
19																																	3	1	2
18	3	4	4	4	4	3	3	4	4	4	3	4	3	4	3	4	4	4	4	0	0	0	0	0	0	0	0	0	0	0	0	0	3	4	2	2
33	2	2	4	4	4	4	2	4	4	2	4	3	4	4	4	4	4	2	4		0	0	0	0	0	0	0	0	0	0	0	0	1	2		2
35	0	1	0	0		1	2	2	3	3	4	2	2	0	0	1	0	1	4	0	0	0	0	0	0	0	0	0	0	0	0	0	2	2	2	3
30	4	4	3	4	4	4	3	3	4	3	4	3	4	3	2	3	3	2	4	0	0	0	0	0	0	0	0	0	0	0	0	0	4	5	3	4
28	4	2	4	4	4	4	3	3	4	4	4	4	4	4	3	3	4	3	4	0	0	0	0	0	0	0	0	0	0	0	0	0	2	2	2	2
24	0	2	2	1	3	2	2	2	2	0	2	0	0	1	1	1	1	1	3	0	0	0	0	0	0	0	0	0	0	0	0	0	3	2	2	2
22	1	2	2	4	1	1	4	1	1	2	4	4	4	0	0	0	4	1	1	3	0	0	0	0	0	0	0	0	0	0	0	0	2	2	2	2
16	0	3	1	2	4	3	3	2	4	3	4	3	2	2	2	1	3	3	3	0	0	0	0	0	0	0	0	0	0	0	0	0	3
26	4	4	4	4	4	4	4	4	4	4	3	4	4	3	4	4	4	4	4	0	1	2	0	0	0	0	0	0	0	0	0	0	3	1	3	3
30	0	2	2	2	3	3	3	2	1	0	1	1	1	1	1	1	2	1	3	2	0	0	0	0	0	0	0	0	0	0	0	0	3	2	3	2
31	2	2	2	2	4	4	4	4	4	2	4	4	4	2	4	4	4	4	4	0	0	0	0	0	0	0	0	0	0	0	0	0	2	2	2	3
29	0	0	1	0	0	1	0	0	4	3	3	0	0	3	0	0	0	0	4	0	0	0	0	0	0	0	0	0	0	0	0	0	3	1	2	3
26	4	3	2	4	4	4	2	3	4	4	4	1	2	4	4	3	4	2	4	2	0	0	0	0	0	0	0	0	0	0	0	0	4	5	3	4
99
31	4	2	2	4	4	2	2	2	4	2	4	2	4	4	4	2	4	2	3	0	0	0	0	0	0	0	0	0	0	0	0	0	3	1	2	2
43	1	3	3	4	4	4	4	4	3	4	1	3	4	3	3	3	4	3	4	0	0	0	0	0	0	0	0	0	0	0	0	0	4	5	3	4
19	2	4	3	2	4	3	2	3	3	2	2	2	2	2	2	2	3	3	4	0	0	0	0	0	0	0	0	0	0	0	0	0	2	2	3
24	4	3	4	4	4	2	3	3	3	3	4	3	3	4	1	3	3	3	3	3	0	2	2	2	2	2	0	0	0	0	0	0	3		2	2
28	2	2	3	2	3	3	3	2	4	2	2	2	2	2	2	2	2	2	4	0	0	0	0	0	0	0	0	0	0	0	0	0	4	1	2	3
35	4	2	4	1	4	2	3	4	3	3	4	3	4	4	3	2	4	2	4	1	0	0	0	0	0	0	0	0	0	0	0	0	3		3	3
30	4	4	3	4	4	4	4	1	3	2	4	1	3	4	4	3	3	3	4	2	0	1	1	1	1	0	0	0	1	0	1	0	3	2	2
21	1	2	4	1	4	2	2	2	4	2	2	4	2	2	2	2	4	2	4	3	1	3	0	1	3	1	1	0	0	0	0	0	3	2	1	3
30	4	1	2		4	3	2	2	2	2	4	3	3	4	2	2	2	1	2	0	1	0	0	0	0	0	0	0	0	0	0	0	3	2	2
27	2		3	4	4	2	2	2	2	2	2	2	2	4	2	2	2	2	2	0	0	0	0	0	0	0	0	0	0	0	0	0	3	1	2	3
28	1	2	2	1	4	1	1	1	2	2	4	4	4	4	4	2	4	4	4	1	0	0	0	0	0	0	0	0	0	0	0	0	3	2	1	2
25	4	4	3	2	1	2	2	4	4	2	4	3	2	4	1	4	2	2	1	1	1	0	0			1	1	0	0	0	1	1	3
30	4	2	4	4	2	1	4	0	1	0	1	4	0	3	0	0	2	0	1	3	0	0	0	0	0	0	0	0	0	0	0	0	2	1	3	1
25	4	2	3	1	4	2	2	2	2	2	2	2	2	2	2	2	2	2	4	0	0	0	0	0	0	0	0	0	0	0	0	0	2	1	2	2
23	4	3	4	3	4	4	3	3	4	3	1	3	2	4	3	3	3	3	4	0	0	0	0	0	0	0	0	0	0	0	0	0	3	1	1	2
29	2		4	1	1	3	0	4	4	1	3	4	3	4	4	4	3	1	1	1	1	1	1	0	0	0	0	0	0	0	0	0	2		1	2
33	1	2	3	1	3	0	2	1	3	2	4	2	2	2	1	2	2	1	3	0	0	2	0	0	0	0	0	0	0	0	0	0	2	2	2	3
20	0	1	3	4	4	3	4	4	4	3	4	4	3	4	4	4	4	4	4	0	0	1	0	1	1	0	0	0	0	0	0	0	3	2	3
33	2	4	2	4	4	4	3	3	4	2	0	2	2	0	2	1	2	2	4	3	2	1	0	0	0	0	0	0	0	0	0	0	3	1	3	2
28	3	3	3	4	4	3	4	4	4	4	3	3	4	4	4	3	4	3	4	0	0	0	0	0	0	0	0	0	0	0	0		3	1	3	2
29	4	4	2	3	4	4	4	4	4	4	2	2		4		4	4		4	0	0	0	0	0	0	0	0	0	0	0	0	0	3	2	2	3
32	0	1	1	1	2	0	1	1	1	1	1	1	1	1	1	1	1	1	1	0	0	0	0	0	0	0	0	0	0	0	0	0	2	2	2	2
28	1	2	1	1	2	3	3	2	1	1	2	1	2	1	1	1	2	1	2	2	2	2	0	0	1	0	0	0	0	0	0	0	3	1	3	2
18	2	3	4	4	4	4	4	4	4	4	4	4	4	4	4	4	4	4	4	0	0	0	0	0	0	0	0	0	0	0	0	0	3	1	2	3
30	4	3	3	3	4	4	4	4	4	4	4	4	4	3	4	4	4	3	4	0	0	0	0	0	0	0	0	0	0	0	0	0	3	2
20	4	4	4	3	4	4	2	4	4	4	3	4	4	4	4	4	4	4	4	0	0	0	0	0	0	0	0	0	0	0	0	0		3	1
18	3	2	3	3	4	3	3	3	3	3	3	2	3	3	3	3	3	3	2	2	2	2	2	0	0	0	0	0	0	0	0	0	3	4	3	3
30	1	2	2	1	2	3	2	3	2	2	1	2	2	1	2	2	2	2	2	1	2	0	1	0	0	0	0	0	0	0	0	0	4	2	3	4
24	2	3	2	1	2	1	2	2	1	1	0	4	2	1	2	2	2	2	2	3	2	3	3	3	2	1	2	0	0	1	3	3	3	1	1	2
20	1	4	2	4	4	4	4	4	4	4	1	1	1	2	2	2	2	2	4	2	0	2	0	0	0	0	0	0	0	0	0	0	3	1	2	2
18	4	2	3	4	4	4	2	3	4	3	4	4	4	4	4	3	2	3	3	2	2	2	1	1	2	0	0	0	0	0	0	0	2	2	3	4
20	0	0	0	1	0	0	0	0	0	0	0	0	1	0	0	0	0	0	2	2	0	1	0	0	1	0	0	0	0	0	0	0	3	4	2	3
20	0	4	4	4	4	4	4	4	4	4	4	4	4	4	4	4	4	4	4	0	0	0	0	0	0	0	0	0	0	0	0	0	2	4	3
17	0	2	4	3	3	2	1	4	2	2	2	2	1	4	4	4	1	1	1	3	2	3	2	1	1	0	0	0	0	0	0	0	3	2	3
23	2	1	2	2	4	4	2	2	4	2	2	2	1	3	3	2	3	2	4	2	2	0	3	0	0	0	0	0	0	0	0	0	3	4		2
39	2	3	4	4	4	4	3	2	4	4	4	4	4	3	4	4	4	4	4	1	1	0	0	0	0	0	0	0	0	0	0	0	2	4	3	2
20	2	1	1	2	2	3	2	1	3	3	3	3	2	2	1	1	1	2	4	2	1	0	3	0	0	0	0	0	0	0	0	0	3	1	3
29	2	2	2	2	2	3	2	2	1	1	2	2	2	2	2	2	2	2	2			0	0	0	0	0	0	0	0	0	0	0	2	3	3	2
15	4	4	4	4	4	4	4	4	4	4	4	4	4	4	4	4	4	4	4	0	0	0	0	0	0	0	0	0	0	0	0	0	3	1	3
21	1	1	2	1	1	1	2	1	1	0	1	1	0	2	1	1	1	1	2	3	2	3	3	1	2	0	0	0	0	0	0	0	3	2	3	4
25	4	4	4	4	4	4	4	4	4	4	4	4	4	4	4	4	4	4	4	0	0	1	0	0	0	0	0	0	0	0	0	0	2		1	1
25	4	4	4	4	4	4	4	4	4	4	4	4	4	4	4	4	4	4	4	1	0	0	0	0	0	0	0	0	0	0	0	0	3		1	2
37	4	4	1	4	4	4	4	4	4	4	4	4	4	4	4	4	4	4	4	0	0	0	0	0	0	0	0	0	0	0	0	0	2	2	2	4
20	4	4	4	4	4	2	4	4	1	1	4	2	1	4	4	4	2	3	3	0	0	0	0	0	0	0	0	0	0	0	0	0	2	2	3	4
31	3	3	3	3	3	3	2	2	3	3	3	1	3	2	1	1	3	2	3	0	0	0	0	0	0	0	0	0	0	0	0	0	4	2	3	3
23	4	4	3	4	4	4	3	4	4	4	4	3	4	4	4	4	4	4	4	0	0	0	0	0	0	0	0	0	0	0	0	0	3	2	3	3
36	1	1		1	0	2	2	2	3	2	4	4	2		2	2	4	4	2	0	0	0	0	0	0	0	0	0	0	0	0	0	2	2	2	2
29	4	4	4	4	4	4	4	4	4	4	4	4	4	4	4	4	4	4	4	0	0	0	0	0	0	0	0	0	0	0	0	0	3	2	2	3
31	4	3	4	4	4	2	3	4	4	4	2	3	3	4	3	3	2	2	3	0	0	0	0	0	0	0	0	0	0	0	0	0	3	2	2	3
21	2	3	0	1	4	4	2	1		3	0	2	1	0	0	2	1	2	4	0	0	0	0	0	0	0	0	0	0	0	0	0	2	1	1	3
35	4	4	4	4	4	4	2	4	4	4	3	2	4	4	4	4	4	4	4	0	0	0	0	0	0	0	0	0	0	0	0	0	3	2	2	2
30	4	4	3	4	4	3	3	4	4	4	4	4	4	4	4	4	4	4	4	0	0	0	0	0	0	0	0	0	0	0	0	0	3	2	3	2
27	4	4	4	4	4	4	4	4	4	4	4	4	4	4	4	4	4	4	4	1	2	2	0	0	0	0	0	0	0	0	0	0	3	2	2	2
22	4	4	4	4	4	4	4	4	4	4	4	4	4	4	3	4	4	4	4	1	0	0	0	0	0	0	0	0	0	0	0	0	4	2	3	4
27	4	4	4	4	4	4	4	3	3	3	4	4	4	4	3	4	4	3	4	0	0	0	0	0	0	0	0	0	0	0	0	0	3	1		3
21	4	4	4	4	4	4	4	4	4	4	4	4	4	4	4	4	4	4	4	2	0	0	0	0	0	0	0	0	0	0	0	0	3	2	2	2
25	2	1	2	1	4	2	2	2	3	3	1	2	1	1	1	2	2	1	4	1	2	3	3	3	3	1	1	1	1	0	0	0	3	2	1	2
35	0	1	2	4	4	4	4	4	1	1	2	4	4	2	4	4	4	4	4	2	0	0	0	0	0	0	0	0	0	0	0	0	3	1	2	2
32	2	3	2	1	4	2	2	3	4	0	0	3	3	2	3	2	4	2	4	0	0	0	0	1	0	0	0	0	0	0	0	0	2	1	2	2
28	0	2	0	0	4	3	4	2	2	2	2	2	2	2	2	2	2	2	2	0	0	0	0	0	0	0	0	0	0	0	0	0	3	2	3	3
25	0	1	0	0	1	1	1	1	1	1	0	1	1	1	1	1	1	1	1	0	0	0	0	0	0	0	0	0	0	0	0	0	3	2	2	2
29	4	4	4	2	3	2	3	3	3	2	1	2	3	4	2	2	2	1	1	2	2	1	2	0	0	0	0	0	0	0	0	0	3	1	3	2
16	4	3	2	4	4	4	3	4	3	4	4	4	3	4	3	3	4	4	4	1	0	0	0	0	0	0	0	0	0	0	0	0	3	2	2
39	2	1	3	3	1	3	3	1	4	4	4	1	4	4	4	4	3	4	4	0	0	0	0	0	0	0	0	0	0	0	0	0	1	2	3	2
23	4	3	3	4	4	3	3	3	4	3	4	4	3	4	3	3	3	2	4	1	1	1	0	0	0	0	0	0	0	0	0	0	3	2	2	4
24	4	3	4	4	4	4	4	3	4	4	4	4	4	4	4	3	3	1	4	3	2	0	0	0	0	0	0	0	0	0	0	0	3	1	2
21	4	4	4	4	4	4	4	4	4	4	4	4	4	4	4	4	4	4	4	0	0	0	0	0	0	0	0	0	0	0	0	0	3	1	3	2
15	4	4	4	4	4	4	4	4	4	4	3	4	4	4	4	4	4	4	4	0	0	0	0	0	0	0	0	0	0	0	0	0	3	2	2
28	3	1	4	4	4	3	2	2	4	3	4	1	1	1	0	3	3	1	3	2	0	0	0	0	0	0	0	0	0	0	0	0	4	6	3	4
24	4	4	4	4	4	4	4	4	4	4	4	4	4	4	4	4	4	4	4	2	1	1	0	1	1	0	0	0	0	0	0	0	3	2	2	3
26	4	4	4	4	4	4	4	4	4	4	4	4	4	4	4	4	4	4	4	0	0	0	0	0	0	0	0	0	0	0	0	0	3	2	3	3
29	1	2	2	3	2	1	2	1	1	1	1	2	2	1	0	1	2	2	1	0	0	0	0	0	0	0	0	0	0	0	0	0	3	2	2	3
19	4	4	4	4	4	4	4	4	4	4	4	4	4	4	4	4	4	4	4	0	0	0	0	0	0	0	0	0	0	0	0	0	3	1	2	3
37	1	4	4	4	4	4	4	2	4	4	4	2	4	4	4	4	4	4	4	0	0	0	0	0	0	0	0	0	0	0	0	0	1	2	2	3
23	1	2	4	4	4	4	4	0	4	4	4	3	4	1	2	4	4	2	4	0	0	0	0	0	0	0	0	0	0	0	0	0	1	2	2	3
37	1	1	1	2	4	4	4	4	4	4	4	2	4	4	4	4	4	4	4	0	0	0	0	0	0	0	0	0	0	0	0	0	2	2	2	4
32	1	1	4	2	4	4	4	4	4	4	4	4	4	4	4	4	4	4	4	2	0	0	0	0	0	0	0	0	0	0	0	0	2	2	3	3
34	0	1	1	1	1	3	3	2	2	1	1	1	1	1	1	1	2	1	3	0	0	0	0	0	0	0	0	0	0	0	0	0	2	4	2	3
38	3	2	3	2	3	2	2	2	2	2	2	2	2	2	2	2	2	2	3	0	0	1	2	1	0	0	0	0	1	0	0	0	3	2	3	4
26	0	1	1	0	1	3	1	1	1	1	2	1	1	1	0	0	1	1	1	1	0	0	0	0	0	0	0	0	0	0	0	0	3	2	2	3
27	1	3	2	2	4	4	2	3	4	3	4	2	3	3	4	3	4	4	4	2	0	0	0	0	0	0	0	0	0	0	0	0	3	2	3	4
17	3	1	1	0	1	0	1	0	0	1	1	1	0	0	0	0	1	0	1	3	3	3	3	3	3	3	3	0	0	0	0	0	3	1	1	2
19	4	2	2	4	3	4	3	3	3	4	4	2	4	4	4	3	4	3	4	2	1	1	0	0	0	0	0	0	0	0	0	0	3	1	2	2
16	0	1	2	4	4	4	3	2	3	2	2	2	2	3	2	2	2	2	2	0	0	1	0	0	0	0	0	0	0	0	0	0		1	2	2
31	0	0	0	0	0	0	0	0	0	0	0	0	0	0	0	0	0	0	0	0	0	0	0	0	0	0	0	0	0	0	0	0	1	2	3	2
29	1	2	2	3	4	3	3	2	1	1	2	2	1	3	1	2	1	2	3	0	1	0	0	0	0	0	0	0	0	0	0	0	2	2	2	3
20	4	4	4	4	4	4	4	4	4	4	3	4	4	4	4	4	4	4	4	0	0	0	0	0	0	0	0	0	0	0	0	0	3	4	1	2
30	3	4	4	4	4	4	4	3	3	3	2	2	3	1	3	4	3	3	4	1	1	0	0	0	0	0	0	0	0	0	0	0	3	4	2	2
22	4	4	4	4	4	4	4	4	4	4	4	4	4	4	4	4	4	4	4	0	0	0	0	0	0	0	0	0	0	0	0	0	2	1	2	2
42	2	1	1	1	3	3	2	2	1	1	1	2	2	1	1	1	1	1	2	0	0	0	0	0	0	0	0	0	0	0	0	0	2	1	2	3
37	4	4	4	4	4	4	4	4	4	4	3	4	4	3	3	4	4	3	4	0	0	0	0	0	0	0	0	0	0	0	0	0	4	1	2	3
33	2	2	3	3	3	2	2	3	4	3	4	3	2	4	3	3	2	3	3	0	0	0	0	0	0	0	0	0	0	0	0	0	3	2	2	2
34	4						4	4	4	4	4	4	4	4	4	4	4	4	4	0	0	0	0	0	0	0	0	0	0	0	0	0	3	1	3	3
28	0	0	0	0	1	2	0	0	1	0	1	0	1	1	0	0	1	0	1	0	0	0	0	0	0	0	0	0	0	0	0	0	2	1	2	2
18	2	3	2	2	2	2	2	2	2	2	2	1	2	2	2	2	2	2	2	0	1	2	1	0	1	0	0	0	0	0	0	0	3	2	1	2
27	1	3	4	4	4	3	4	4	4	4	4	4	4	4	4	4	4	4	4	0	0	0	0	0	0	0	0	0	0	0	0	0	2	1	3
17	1	2	2	3	4	4	3	4	4	4	2	2	2	2	1	1	1	2	4	0	0	0	0	1	0	0	0	0	0	0	0	0	2	1	2	2
27	3	4	3	3	4	3	3	3	2	2	1	1	2	1	2	2	3	2	3	0	0	0	0	0	0	0	0	0	0	0	0	0	3	2	2	4
23	1	4	3	4	4	3	4	3	4	4	4	4	4	3	3	4	4	3	4	0	1	0	0	0	0	0	0	0	0	0	0	0	3	1	2	2
26	4	4	4	4	4	4	3	4	4	4	1	1	2	2	4	4	4	4	4	0	0	0	0	0	0	0	0	0	0	0	0	0	3	2	3	4
25	4	4	4	3	4	2	4	4	4	4	4	4	4	4	4	4	4	4	4	2	2	0	0	0	0	0	0	0	0	0	0	0	3	2	3	2
30	1	2	2	2	4	2	2	4	2	2	4	2	2	4	2	2	2	2	4	0	0	0	0	0	0	0	0	0	0	0	0	0	2	1	2	2
44	2	4	4	4	4	4	4	4	4	4	2	4	4	2	4	4	4	4	4	0	0	0	0	0	0	0	0	0	0	0	0	0	3	2	3	3
22	1	4	4	1	4	4	3	3	4	2	0	2	2	3	2	2	2	3	4	0	0	0	0	0	0	0	0	0	0	0	0	0	3	2	2
21	1	3	4	1	4	0	4	4	4	4	2	4	4	4	4	4	4	4	4	0	0	0	0	0	0	0	0	0	0	0	0	0	3	1	3
32	2	3	3	2	4	4	4	4	4	4	3	3	3	2	4	4	3	4	4	1	0	0	0	0	0	0	0	0	0	0	0	0	4	5	3	4
18	4	4	4	4	4	4	4	4	4	4	4	4	4	4	3	4	4	4	2	2	2	3	0	0	0	0	0	0	0	0	0	0	3	3		3
16	1	1	3	3	4	4	1	2	2	2	0	0	0	4	0	0	1	0	4	0	0	0	0	0	0	0	0	0	0	0	0	0	3	2	1	2
27		4	4	1	3	4	2	3	2	1	4	2	2	1	2	2	3	2	4	2	2	1	0	0	0	0	0	0	0	0	0	0	3	2	2	2
38	0	0	0	0	2	0	2	0	2	0	0	1	0	0	0	2	0	0	0	0	0	0	0	0	1	0	0	0	0	0	0	0	1	2	2	2
27	4	3	3	4	4	4	3	4	4	4	4	3	4	4	3	3	4	3	4	0	0	0	0	0	0	0	0	0	0	0	0	0	3	1	2	2
38	0	1	0	1	3	3	3	3	4	4	4	2	3	3	3	1	3	3	4	0	0	0	0	0	0	0	0	0	0	0	0	0	2	2	3	2
32	4	3	4	2	4	4	4	4	3	2	4	3	2	3	1	2	3	2	3	0	0	0	0	0	0	0	0	0	0	0	0	0	3	1	2	3
33	2	2	2	2	2	2	2	2	2	2	2	2	2	2	2	2	2	2	2	0	0	0	0	0	0	0	0	0	0	0	0	0	2	1	2	2
30	4	3	4	4	4	3	3	4	3	3	4	3	3	3	3	3	3	3	4	0	0	0	0	0	0	0	0	0	0	0	0	0	3		3	3
28	1	2	2	1	1	1	2	1	1	2	1	2	3	3	1	2	3	1	2	0	0	0	0	0	0	0	0	0	0	0	0	0	3	2	2	4
26	3	4	2	4	2	2	2	1	2	2	1	2	2	3	1	1	2	1	2	0	0	0	0	0	0	0	0	0	0	0	0	0	2	2	2	2
26	4	3	3	4	4	3	3	4	4	4	4	3	3	4	3	3	4	3	4	0	0	0	0	0	0	0	0	0	0	0	0	0		2	1	2
28	3	2	3	1	2	2	3	2	2	2	3	3	2	3	3	3	3	2	3	0	0	0	0	0	0	0	0	0	0	0	0	0	3	2	2	2
20	0	4	4	4	4	4	4	4	4	4	3	3	4	4	4	4	4	4	4	2	0	0	0	0	0	0	0	0	0	0	0	0	3	1	1	2
17	2	4	4	4	4	4	4	4	4	4	4	4	4	4	4	4	4	4	4	0	0	0	0	0	0	0	0	0	0	0	0	0	2	2	2	2
31	2	2	2	1	2	2	2	2	2	2	3	2	2	3	1	1	2	1	2	2	2	2	0	0	2	0		0	0	0	0	0	3	2	3	4
36	1	2	2	1	2	2	2	2	1	1	1	2	2	1	1	1	2	2	1	2	2	0	0	0	0	0	0	0	0	0	0	0	3	2	2	3
30	3	4	4	4	4	3	3	4	4	4	4	4	4	4	4	4	4	3	4	0	0	0	0	0	0	0	0	0	0	0	0	0	4	2	2	3
24	4	4	4	4	4	4	4	4	4	4	4	4	4	4	4	4	4	4	4	2	0	0	0	0	0	0	0	0	0	0	0	0		3	2	2
16	1	0	1	0	4	4	2	2	4	4	3	3	4	3	2	4	4	3	4	0	0	0	0	0	0	0	0	0	0	0	0	0	3	2	3	2
25	2	2	1	2	4	4	4	4	4	4	4	3	4	2	4	4	4	4	4	0	0	0	0	0	0	0	0	0	0	0	0	0	2	2	3	2
